# Supplementary material for: Neofusicoccum parvum Colonization of the Grapevine Woody Stem Triggers Asynchronous Host Responses at the Site of Infection and in the Leaves
Source: Front Plant Sci. 2017 Jun 28;8:1117. doi: 10.3389/fpls.2017.01117 (PMC5487829; doi:10.3389/fpls.2017.01117)
Supplement: Supplementary file 7 [file DataSheet3.XLSX]

## Sheet: A
(A) Differentially expressed genes (DEGs), up- and down-regulated genes, in woody stem and leaf tissues after N. parvum innoculation
0 hpi				3 hpi				24 hpi				2 wpi				6 wpi				8 wpi				12 wpi
Stem		Leaf		Stem		Leaf		Stem		Leaf		Stem		Leaf		Stem		Leaf		Stem		Leaf		Stem		Leaf
Up-regulated genes	Down-regulated genes	Up-regulated genes	Down-regulated genes	Up-regulated genes	Down-regulated genes	Up-regulated genes	Down-regulated genes	Up-regulated genes	Down-regulated genes	Up-regulated genes	Down-regulated genes	Up-regulated genes	Down-regulated genes	Up-regulated genes	Down-regulated genes	Up-regulated genes	Down-regulated genes	Up-regulated genes	Down-regulated genes	Up-regulated genes	Down-regulated genes	Up-regulated genes	Down-regulated genes	Up-regulated genes	Down-regulated genes	Up-regulated genes	Down-regulated genes
VIT_17s0000g03560	VIT_18s0122g00550	VIT_00s0265g00050	VIT_08s0040g01890	VIT_17s0000g10020	VIT_07s0104g00540	VIT_06s0061g00730	VIT_04s0044g00530	VIT_13s0067g03770	VIT_15s0046g03570	VIT_06s0004g04080	VIT_13s0019g00330	VIT_18s0001g04280	VIT_18s0001g02060	VIT_15s0046g03570	VIT_04s0023g02130	VIT_04s0008g03550	VIT_01s0011g01460	VIT_15s0021g01280	VIT_04s0044g00530	VIT_16s0013g00630	VIT_07s0104g00420	VIT_12s0142g00340	VIT_01s0146g00150	VIT_13s0084g00080	VIT_14s0068g00360	VIT_19s0027g00740	VIT_14s0108g00700
VIT_02s0012g00170	VIT_03s0038g02800	VIT_12s0028g02410	VIT_16s0098g01720	VIT_11s0052g01730	VIT_11s0016g03710	VIT_13s0019g00330	VIT_04s0008g02640	VIT_18s0001g04120	VIT_12s0028g00400	VIT_07s0151g00350	VIT_07s0005g03930	VIT_18s0001g04120	VIT_07s0129g00200	VIT_05s0020g04080	VIT_18s0001g12830	VIT_16s0013g00630	VIT_01s0010g02550	VIT_10s0597g00020	VIT_01s0146g00150	VIT_06s0061g00730	VIT_03s0038g03560	VIT_11s0052g01190	VIT_05s0020g00420	VIT_06s0061g00730	VIT_19s0027g01290	VIT_12s0142g00340	VIT_01s0011g06470
VIT_01s0011g05650	VIT_06s0061g00730	VIT_19s0014g02370	VIT_11s0016g01300	VIT_05s0124g00400	VIT_01s0146g00150	VIT_03s0091g01060	VIT_07s0031g00800	VIT_18s0001g05240	VIT_08s0007g03750	VIT_10s0597g00020	VIT_01s0146g00150	VIT_15s0046g03570	VIT_02s0012g00990	VIT_02s0012g00170	VIT_19s0014g01420	VIT_08s0007g04570	VIT_01s0026g00710	VIT_06s0004g04080	VIT_00s0322g00030	VIT_13s0084g00080	VIT_17s0000g04300	VIT_11s0052g01280	VIT_05s0020g04800	VIT_10s0003g01830	VIT_01s0011g01980	VIT_19s0090g01050	VIT_07s0005g05620
VIT_01s0011g04790	VIT_15s0021g02680	VIT_16s0022g01570	VIT_16s0100g00470	VIT_00s2349g00010	VIT_12s0057g00380	VIT_00s0203g00160	VIT_17s0000g09810	VIT_17s0000g03560	VIT_18s0001g00060	VIT_15s0021g01280	VIT_08s0007g03990	VIT_17s0000g03560	VIT_00s0323g00060	VIT_05s0020g01910	VIT_07s0191g00090	VIT_02s0025g02020	VIT_06s0080g00210	VIT_04s0044g01100	VIT_03s0038g00630	VIT_18s0122g00550	VIT_12s0034g01180	VIT_11s0052g01270	VIT_08s0058g01110	VIT_08s0007g04570	VIT_03s0038g00020	VIT_05s0062g00240	VIT_08s0032g01150
VIT_15s0046g02510	VIT_11s0016g03710	VIT_18s0001g14980	VIT_12s0059g01250	VIT_15s0048g00350	VIT_15s0046g02000	VIT_07s0129g01100	VIT_01s0127g00400	VIT_04s0008g06920	VIT_04s0023g02130	VIT_06s0004g08170	VIT_04s0023g01120	VIT_05s0020g01910	VIT_01s0011g05410	VIT_08s0007g03750	VIT_18s0001g06330	VIT_14s0068g01360	VIT_08s0040g01330	VIT_14s0066g01730	VIT_19s0015g00510	VIT_03s0038g02800	VIT_07s0005g06340	VIT_11s0052g01180	VIT_15s0048g02900	VIT_03s0091g01060	VIT_14s0066g01420	VIT_19s0014g05040	VIT_00s0487g00010
VIT_00s0301g00050	VIT_04s0008g03780	VIT_08s0040g00670	VIT_02s0025g01380	VIT_08s0007g00060	VIT_18s0001g09710	VIT_12s0134g00500	VIT_19s0014g03710	VIT_05s0020g04080	VIT_18s0001g12830	VIT_17s0000g06940	VIT_12s0059g01250	VIT_18s0041g02070	VIT_11s0016g00590	VIT_18s0122g01170	VIT_07s0031g01250	VIT_11s0016g01200	VIT_11s0016g01300	VIT_16s0039g02020	VIT_09s0002g06380	VIT_08s0056g00210	VIT_05s0029g00040	VIT_11s0052g01200	VIT_00s0207g00010	VIT_14s0068g01360	VIT_12s0034g00660	VIT_00s0590g00010	VIT_13s0084g00130
VIT_05s0049g01980	VIT_03s0091g01060	VIT_05s0020g00880	VIT_02s0025g00260	VIT_07s0005g04460	VIT_07s0191g00130	VIT_17s0000g08480	VIT_05s0020g04800	VIT_18s0041g02050	VIT_10s0003g01240	VIT_05s0062g00790	VIT_17s0000g09810	VIT_18s0041g02010	VIT_02s0025g01380	VIT_18s0041g02020	VIT_07s0005g03060	VIT_18s0001g07220	VIT_08s0007g07130	VIT_18s0072g00370	VIT_01s0011g05380	VIT_16s0098g01720	VIT_11s0016g01300	VIT_10s0003g02190	VIT_18s0001g03290	VIT_18s0001g14170	VIT_06s0004g04400	VIT_01s0146g00360	VIT_09s0002g08090
VIT_06s0061g00450	VIT_14s0128g00440	VIT_02s0087g00930	VIT_01s0127g00400	VIT_16s0050g02480	VIT_07s0031g00650	VIT_19s0027g00740	VIT_07s0104g00960	VIT_18s0041g02070	VIT_18s0001g07240	VIT_19s0027g00740	VIT_07s0005g02440	VIT_18s0041g02060	VIT_07s0005g05520	VIT_19s0090g00330	VIT_18s0001g03300	VIT_14s0171g00510	VIT_14s0060g01090	VIT_02s0012g02190	VIT_08s0040g00630	VIT_04s0008g03780	VIT_19s0090g01320	VIT_12s0035g00340	VIT_08s0040g00680	VIT_14s0066g01220	VIT_19s0015g01550	VIT_10s0003g02190	VIT_05s0020g00760
VIT_10s0116g01650	VIT_18s0001g07220	VIT_12s0035g00350	VIT_09s0002g06380	VIT_03s0017g01280	VIT_12s0035g01150	VIT_14s0060g01090	VIT_10s0042g00100	VIT_18s0041g02010	VIT_07s0191g00090	VIT_14s0083g01160	VIT_09s0002g06380	VIT_18s0041g02080	VIT_17s0000g09810	VIT_12s0028g02410	VIT_11s0052g01730	VIT_04s0023g03610	VIT_00s0323g00050	VIT_12s0142g00340	VIT_11s0016g00770	VIT_03s0091g01060	VIT_01s0146g00150	VIT_14s0066g02060	VIT_09s0002g04490	VIT_12s0134g00500	VIT_08s0040g01710	VIT_10s0003g02060	VIT_14s0066g02350
VIT_02s0087g00930	VIT_18s0001g02060	VIT_09s0002g05600	VIT_08s0040g00970	VIT_06s0004g05880	VIT_09s0002g02400	VIT_14s0083g01160	VIT_07s0005g06420	VIT_18s0041g02060	VIT_17s0000g00870	VIT_18s0072g00370	VIT_01s0127g00400	VIT_18s0041g02020	VIT_15s0046g02000	VIT_12s0059g01380	VIT_14s0068g00830	VIT_03s0038g02770	VIT_12s0059g01010	VIT_03s0038g02180	VIT_18s0001g13580	VIT_19s0085g00690	VIT_11s0016g00590	VIT_01s0011g01970	VIT_13s0019g02630	VIT_07s0005g03450	VIT_07s0005g02230	VIT_17s0000g00210	VIT_07s0031g00920
VIT_03s0063g00380	VIT_18s0001g14170	VIT_13s0074g00700	VIT_19s0014g03710	VIT_13s0064g01050	VIT_15s0048g00660	VIT_01s0011g05390	VIT_08s0007g00330	VIT_18s0122g01160	VIT_02s0025g04980	VIT_18s0122g00120	VIT_06s0004g04610	VIT_05s0049g00410	VIT_01s0127g00400	VIT_12s0028g02420	VIT_18s0001g05060	VIT_18s0001g08580	VIT_05s0077g01280	VIT_09s0002g00330	VIT_00s2837g00010	VIT_14s0128g00440	VIT_08s0007g03990	VIT_06s0080g00090	VIT_18s0001g08550	VIT_04s0023g03610	VIT_04s0044g01150	VIT_08s0058g01000	VIT_08s0040g00680
VIT_08s0058g00470	VIT_14s0066g01050	VIT_06s0061g00350	VIT_17s0000g03700	VIT_00s0187g00260	VIT_06s0004g05430	VIT_14s0066g01730	VIT_10s0092g00590	VIT_18s0041g02020	VIT_00s1764g00010	VIT_02s0012g02190	VIT_11s0016g00770	VIT_01s0011g05650	VIT_14s0066g01060	VIT_11s0016g00360	VIT_07s0104g00660	VIT_13s0019g04900	VIT_00s0340g00060	VIT_07s0005g00890	VIT_16s0022g00470	VIT_18s0001g14170	VIT_11s0016g00290	VIT_04s0008g06570	VIT_03s0063g02660	VIT_14s0068g00270	VIT_03s0038g00670	VIT_04s0008g03770	VIT_12s0034g00040
VIT_11s0052g00240	VIT_00s0313g00010	VIT_06s0004g01770	VIT_03s0091g00580	VIT_18s0001g13650	VIT_04s0008g05410	VIT_18s0072g00370	VIT_11s0065g01100	VIT_19s0090g00330	VIT_05s0020g02130	VIT_16s0039g02020	VIT_19s0014g03710	VIT_02s0012g00400	VIT_05s0020g00420	VIT_18s0086g00710	VIT_09s0002g05280	VIT_16s0022g00700	VIT_02s0025g01380	VIT_09s0002g00320	VIT_01s0026g01460	VIT_04s0008g00530	VIT_05s0062g01160	VIT_00s0480g00100	VIT_19s0090g01000	VIT_16s0022g00870	VIT_13s0019g04500	VIT_18s0001g00950	VIT_18s0001g13340
VIT_18s0001g04980	VIT_04s0008g00530	VIT_18s0001g15000	VIT_18s0001g15310	VIT_02s0025g03270	VIT_04s0008g05400	VIT_18s0122g00120	VIT_00s0389g00040	VIT_12s0059g01380	VIT_08s0007g08470	VIT_02s0025g01850	VIT_07s0191g00130	VIT_12s0059g01380	VIT_12s0028g03390	VIT_06s0004g03300	VIT_06s0061g00280	VIT_19s0027g01290	VIT_17s0000g09810	VIT_11s0052g01320	VIT_00s0187g00360	VIT_13s0067g01420	VIT_12s0057g00380	VIT_00s0480g00070	VIT_09s0002g00640	VIT_14s0083g01160	VIT_19s0014g02730	VIT_00s0480g00070	VIT_05s0049g00950
VIT_15s0048g02240	VIT_13s0067g01420	VIT_01s0146g00100	VIT_07s0005g06420	VIT_05s0094g01080	VIT_14s0068g00830	VIT_12s0035g02180	VIT_13s0084g00070	VIT_05s0049g00430	VIT_13s0064g00440	VIT_14s0066g01730	VIT_16s0022g00470	VIT_05s0049g00430	VIT_08s0040g02030	VIT_02s0025g00370	VIT_17s0119g00350	VIT_11s0052g01320	VIT_01s0127g00400	VIT_11s0052g01270	VIT_19s0014g02740	VIT_08s0040g00930	VIT_07s0005g00890	VIT_00s0480g00060	VIT_04s0008g01110	VIT_05s0020g05060	VIT_17s0000g06350	VIT_00s0480g00060	VIT_08s0007g00540
VIT_01s0011g05810	VIT_08s0040g00930	VIT_01s0011g05810	VIT_14s0006g01090	VIT_06s0004g05980	VIT_02s0025g03590	VIT_07s0005g00730	VIT_03s0038g00760	VIT_18s0001g03300	VIT_10s0003g00530	VIT_12s0142g00340	VIT_03s0091g00580	VIT_18s0001g05060	VIT_03s0063g01370	VIT_15s0048g01010	VIT_00s0391g00070	VIT_11s0052g01280	VIT_02s0025g00260	VIT_05s0062g00240	VIT_16s0098g01770	VIT_13s0064g00590	VIT_05s0020g03470	VIT_10s0116g00560	VIT_13s0019g02850	VIT_07s0005g01030	VIT_18s0001g06580	VIT_10s0116g00560	VIT_05s0020g00930
VIT_12s0059g00760	VIT_02s0012g00990	VIT_04s0008g05620	VIT_01s0011g01660	VIT_13s0019g04280	VIT_11s0037g01120	VIT_09s0002g00330	VIT_02s0033g01000	VIT_02s0025g00360	VIT_15s0048g01000	VIT_12s0035g02180	VIT_05s0102g00310	VIT_03s0017g01240	VIT_08s0040g01970	VIT_18s0001g07320	VIT_18s0001g06250	VIT_11s0052g01270	VIT_04s0044g01000	VIT_05s0062g00610	VIT_10s0003g03310	VIT_11s0016g00460	VIT_11s0052g01370	VIT_00s0480g00040	VIT_02s0154g00480	VIT_00s0414g00060	VIT_19s0090g00530	VIT_18s0157g00190	VIT_12s0059g00640
VIT_11s0149g00040	VIT_16s0100g00470	VIT_04s0044g01110	VIT_18s0001g14950	VIT_03s0038g00760	VIT_07s0129g00300	VIT_11s0016g00330	VIT_11s0037g00570	VIT_18s0001g05060	VIT_09s0002g00770	VIT_03s0038g02180	VIT_05s0049g01500	VIT_18s0001g07320	VIT_03s0063g00020	VIT_02s0012g01900	VIT_04s0044g01740	VIT_05s0062g00240	VIT_05s0020g00420	VIT_11s0052g01190	VIT_15s0048g00560	VIT_18s0001g02060	VIT_02s0025g00250	VIT_18s0157g00190	VIT_13s0019g01430	VIT_18s0001g08580	VIT_04s0008g01480	VIT_08s0007g04800	VIT_16s0050g00020
VIT_11s0052g00420	VIT_17s0000g05050	VIT_06s0004g02060	VIT_17s0000g04130	VIT_13s0084g00810	VIT_07s0005g00070	VIT_07s0005g00890	VIT_02s0033g01020	VIT_08s0056g00200	VIT_02s0025g03190	VIT_09s0002g00320	VIT_00s0214g00020	VIT_00s0391g00070	VIT_10s0116g00600	VIT_14s0060g00820	VIT_18s0122g00610	VIT_05s0062g00250	VIT_07s0005g00890	VIT_11s0052g01300	VIT_18s0001g14950	VIT_11s0016g03750	VIT_14s0108g00510	VIT_11s0016g05060	VIT_06s0004g04470	VIT_02s0025g01750	VIT_18s0001g10210	VIT_08s0007g05000	VIT_14s0060g00720
VIT_01s0026g01660	VIT_04s0044g01100	VIT_06s0004g06020	VIT_08s0007g01920	VIT_18s0001g03660	VIT_12s0057g00630	VIT_09s0002g00320	VIT_04s0023g02290	VIT_11s0016g02480	VIT_04s0044g01490	VIT_07s0005g00890	VIT_08s0007g07620	VIT_17s0000g02140	VIT_06s0009g02040	VIT_00s1217g00010	VIT_12s0028g00590	VIT_11s0052g01190	VIT_08s0007g07780	VIT_05s0062g00480	VIT_11s0052g01800	VIT_18s0122g00470	VIT_02s0154g00610	VIT_01s0011g03500	VIT_13s0019g00860	VIT_02s0025g01950	VIT_08s0058g00210	VIT_07s0005g00360	VIT_17s0000g02050
VIT_06s0004g06020	VIT_14s0083g01150	VIT_15s0046g01450	VIT_03s0063g02680	VIT_00s0434g00090	VIT_07s0005g02220	VIT_16s0098g01900	VIT_14s0066g01210	VIT_07s0141g00830	VIT_16s0013g02100	VIT_02s0087g00400	VIT_07s0005g06420	VIT_12s0028g00590	VIT_02s0025g00250	VIT_19s0014g02840	VIT_12s0034g01080	VIT_11s0052g01300	VIT_14s0066g01060	VIT_11s0052g01200	VIT_17s0000g03740	VIT_14s0068g01360	VIT_14s0083g00070	VIT_04s0044g01120	VIT_13s0019g02840	VIT_02s0025g01900	VIT_01s0011g04990	VIT_04s0044g01130	VIT_19s0090g01000
VIT_05s0062g00900	VIT_14s0068g00270	VIT_06s0080g00170	VIT_03s0063g02620	VIT_03s0063g00600	VIT_11s0016g05520	VIT_06s0004g01750	VIT_08s0007g03240	VIT_03s0017g01240	VIT_00s0203g00060	VIT_16s0098g01900	VIT_10s0003g03310	VIT_05s0049g01980	VIT_04s0043g00290	VIT_03s0038g04100	VIT_07s0005g02670	VIT_11s0052g01200	VIT_06s0061g00550	VIT_12s0134g00160	VIT_03s0063g02680	VIT_08s0007g07120	VIT_15s0048g02730	VIT_04s0044g01110	VIT_13s0019g03160	VIT_01s0011g02170	VIT_00s1569g00010	VIT_01s0010g02460	VIT_02s0025g00360
VIT_05s0062g00890	VIT_11s0016g00590	VIT_04s0043g00370	VIT_18s0001g15330	VIT_18s0089g00910	VIT_13s0019g00720	VIT_11s0052g01250	VIT_01s0011g06450	VIT_12s0034g01810	VIT_08s0040g00710	VIT_10s0116g00520	VIT_18s0001g14950	VIT_15s0046g02170	VIT_13s0067g02400	VIT_19s0014g02370	VIT_01s0010g02670	VIT_11s0052g01220	VIT_01s0137g00300	VIT_11s0052g01180	VIT_13s0073g00140	VIT_08s0007g05500	VIT_08s0007g00330	VIT_14s0108g01520	VIT_13s0019g02780	VIT_18s0089g00210	VIT_13s0019g02740	VIT_04s0044g01120	VIT_19s0015g00670
VIT_08s0007g05210	VIT_07s0005g04110	VIT_00s0181g00210	VIT_13s0067g01180	VIT_12s0028g03550	VIT_01s0011g04610	VIT_05s0062g00250	VIT_00s0220g00180	VIT_07s0104g00660	VIT_16s0098g01430	VIT_11s0052g01340	VIT_18s0001g15330	VIT_08s0007g07520	VIT_06s0004g03890	VIT_08s0056g01640	VIT_15s0048g00350	VIT_00s0386g00050	VIT_01s0011g02860	VIT_11s0052g01260	VIT_12s0134g00420	VIT_04s0023g03610	VIT_08s0032g00440	VIT_05s0094g00360	VIT_11s0037g00510	VIT_07s0005g00740	VIT_11s0103g00220	VIT_08s0217g00100	VIT_10s0003g03750
VIT_13s0067g02220	VIT_11s0037g00530	VIT_13s0106g00060	VIT_10s0116g00990	VIT_00s0880g00010	VIT_01s0011g04950	VIT_05s0062g00610	VIT_03s0038g00670	VIT_13s0019g00510	VIT_04s0008g00650	VIT_11s0052g01250	VIT_14s0108g01340	VIT_08s0007g08410	VIT_17s0000g06030	VIT_05s0049g01980	VIT_01s0010g02740	VIT_11s0052g01180	VIT_09s0002g04750	VIT_00s0533g00050	VIT_03s0091g00440	VIT_13s0019g04070	VIT_01s0011g01660	VIT_05s0077g00510	VIT_02s0025g00280	VIT_08s0007g04820	VIT_03s0091g00640	VIT_10s0071g01060	VIT_00s0194g00190
VIT_18s0001g02020	VIT_07s0005g01030	VIT_07s0005g00820	VIT_05s0049g01520	VIT_04s0008g06830	VIT_14s0068g00870	VIT_01s0150g00460	VIT_04s0023g02130	VIT_10s0116g01480	VIT_02s0025g03380	VIT_11s0052g01280	VIT_17s0000g05510	VIT_19s0014g02170	VIT_07s0141g00730	VIT_18s0001g14980	VIT_11s0052g01090	VIT_11s0052g01260	VIT_08s0007g00730	VIT_09s0070g00480	VIT_18s0122g01320	VIT_04s0044g01460	VIT_07s0005g06480	VIT_12s0028g01670	VIT_17s0000g07190	VIT_07s0005g05520	VIT_04s0023g00930	VIT_14s0108g01520	VIT_11s0016g04670
VIT_04s0043g00370	VIT_08s0007g03990	VIT_15s0021g01880	VIT_03s0063g00370	VIT_12s0121g00300	VIT_08s0058g00170	VIT_12s0134g00160	VIT_00s0878g00020	VIT_04s0023g03820	VIT_07s0031g01540	VIT_05s0062g00610	VIT_15s0048g02550	VIT_16s0050g00390	VIT_05s0020g04800	VIT_13s0074g00100	VIT_16s0039g02040	VIT_08s0040g02030	VIT_08s0007g04690	VIT_12s0059g00570	VIT_07s0031g01680	VIT_17s0000g03290	VIT_17s0000g04130	VIT_17s0000g08010	VIT_04s0008g01570	VIT_17s0000g09810	VIT_14s0108g00850	VIT_06s0004g06660	VIT_19s0014g03310
VIT_06s0004g04550	VIT_10s0003g01560	VIT_00s0484g00030	VIT_02s0025g03190	VIT_16s0050g01310	VIT_02s0025g04170	VIT_19s0015g00530	VIT_11s0016g05770	VIT_00s0391g00070	VIT_14s0171g00300	VIT_01s0026g00200	VIT_03s0091g00440	VIT_02s0025g03660	VIT_14s0081g00500	VIT_07s0031g01540	VIT_15s0048g00360	VIT_00s0533g00050	VIT_06s0004g01100	VIT_15s0048g01750	VIT_13s0084g00070	VIT_14s0068g00270	VIT_04s0008g04910	VIT_01s0026g00280	VIT_16s0050g01150	VIT_03s0038g02180	VIT_14s0060g02110	VIT_11s0016g02800	VIT_07s0031g02210
VIT_12s0034g00080	VIT_16s0039g02020	VIT_07s0031g01180	VIT_13s0084g00070	VIT_07s0129g00180	VIT_01s0026g01770	VIT_00s0533g00050	VIT_07s0031g00920	VIT_18s0001g06250	VIT_19s0014g01520	VIT_05s0062g00250	VIT_03s0063g01150	VIT_06s0061g00450	VIT_08s0007g00040	VIT_08s0040g00670	VIT_08s0056g01570	VIT_09s0070g00480	VIT_08s0007g05330	VIT_12s0028g02990	VIT_01s0137g00410	VIT_14s0083g01150	VIT_17s0000g07000	VIT_06s0004g05670	VIT_00s0179g00150	VIT_16s0022g00940	VIT_11s0037g01180	VIT_06s0061g01120	VIT_05s0020g04490
VIT_01s0011g03070	VIT_07s0005g00740	VIT_18s0001g02340	VIT_00s0389g00040	VIT_07s0129g00110	VIT_15s0048g01120	VIT_12s0059g00570	VIT_01s0011g00250	VIT_03s0038g04100	VIT_07s0005g00070	VIT_12s0134g00160	VIT_10s0116g01650	VIT_11s0052g01110	VIT_08s0040g02260	VIT_19s0014g02170	VIT_01s0010g01130	VIT_12s0059g00570	VIT_16s0039g01690	VIT_11s0016g04190	VIT_00s0207g00010	VIT_16s0022g00870	VIT_08s0007g01920	VIT_13s0064g01470	VIT_04s0008g01490	VIT_02s0154g00600	VIT_15s0046g01540	VIT_02s0025g00480	VIT_16s0098g01000
VIT_09s0070g00080	VIT_18s0001g14040	VIT_17s0000g00530	VIT_14s0066g01240	VIT_14s0030g02110	VIT_12s0028g03110	VIT_08s0032g00930	VIT_01s0011g04630	VIT_17s0000g02140	VIT_06s0009g01930	VIT_00s0386g00050	VIT_13s0084g00070	VIT_16s0039g02040	VIT_17s0000g04210	VIT_02s0025g03660	VIT_01s0011g00250	VIT_03s0063g00010	VIT_04s0008g04890	VIT_18s0001g10040	VIT_14s0030g01550	VIT_04s0044g01100	VIT_16s0039g02550	VIT_08s0007g05800	VIT_08s0007g00130	VIT_07s0005g01930	VIT_13s0019g02640	VIT_13s0019g01180	VIT_11s0016g00210
VIT_06s0004g05120	VIT_01s0137g00240	VIT_15s0048g01880	VIT_13s0019g02360	VIT_00s0463g00030	VIT_18s0001g01470	VIT_15s0048g01750	VIT_08s0007g05990	VIT_12s0028g00590	VIT_06s0009g01080	VIT_11s0016g04190	VIT_13s0019g02360	VIT_12s0028g00710	VIT_01s0011g01660	VIT_17s0000g01790	VIT_19s0093g00550	VIT_11s0016g04190	VIT_04s0044g01260	VIT_11s0016g03640	VIT_17s0000g01910	VIT_14s0083g01160	VIT_18s0001g15330	VIT_18s0001g15460	VIT_13s0019g03170	VIT_11s0016g03020	VIT_16s0039g02350	VIT_12s0028g03720	VIT_12s0028g03790
VIT_02s0025g03310	VIT_07s0005g05520	VIT_01s0011g05830	VIT_10s0003g00900	VIT_00s0691g00010	VIT_07s0005g00330	VIT_12s0028g02990	VIT_15s0046g01190	VIT_05s0049g01980	VIT_16s0098g01200	VIT_12s0059g00570	VIT_11s0037g00340	VIT_08s0007g00060	VIT_17s0000g04130	VIT_03s0063g00300	VIT_00s0227g00130	VIT_05s0049g00980	VIT_08s0007g02550	VIT_19s0014g05040	VIT_14s0036g00520	VIT_12s0059g00960	VIT_14s0030g00520	VIT_13s0067g01120	VIT_04s0008g01500	VIT_06s0061g00550	VIT_18s0001g03890	VIT_12s0028g01670	VIT_15s0048g02420
VIT_03s0038g02970	VIT_01s0127g00870	VIT_02s0025g03310	VIT_07s0031g01600	VIT_04s0023g00830	VIT_16s0100g00220	VIT_11s0016g04190	VIT_05s0020g02880	VIT_15s0046g02170	VIT_05s0051g00670	VIT_08s0032g00930	VIT_19s0090g00810	VIT_18s0122g00510	VIT_17s0000g04990	VIT_00s1674g00010	VIT_16s0050g01850	VIT_19s0090g01440	VIT_13s0019g01890	VIT_02s0025g03540	VIT_04s0008g01300	VIT_18s0001g08580	VIT_01s0127g00370	VIT_07s0031g02840	VIT_13s0019g02740	VIT_11s0052g01280	VIT_08s0040g01660	VIT_06s0080g00420	VIT_02s0033g01100
VIT_10s0116g01740	VIT_01s0127g00850	VIT_09s0018g01670	VIT_08s0007g01930	VIT_11s0016g03580	VIT_09s0002g05180	VIT_11s0016g03640	VIT_15s0048g02600	VIT_04s0023g03100	VIT_17s0000g10260	VIT_12s0057g01020	VIT_06s0009g01080	VIT_12s0035g00350	VIT_08s0007g01920	VIT_18s0001g12510	VIT_17s0000g09320	VIT_05s0049g01740	VIT_16s0050g02540	VIT_16s0050g00380	VIT_08s0007g03240	VIT_16s0039g02020	VIT_17s0000g00040	VIT_08s0007g01510	VIT_04s0008g01580	VIT_10s0003g02440	VIT_14s0083g00650	VIT_01s0026g00280	VIT_06s0080g01090
VIT_14s0060g01990	VIT_11s0016g03020	VIT_18s0001g01830	VIT_11s0037g00570	VIT_19s0014g03090	VIT_02s0025g01080	VIT_06s0004g00480	VIT_02s0025g02790	VIT_08s0007g07520	VIT_05s0136g00140	VIT_02s0025g03290	VIT_18s0122g00960	VIT_12s0035g00330	VIT_06s0004g06100	VIT_18s0072g00910	VIT_17s0000g02680	VIT_14s0068g00230	VIT_02s0025g00650	VIT_15s0046g00220	VIT_05s0020g04070	VIT_02s0025g01750	VIT_15s0021g01300	VIT_02s0012g00400	VIT_13s0019g03000	VIT_00s0386g00050	VIT_07s0005g02080	VIT_13s0064g01470	VIT_04s0008g05850
VIT_18s0001g12100	VIT_02s0154g00600	VIT_13s0067g00330	VIT_10s0003g00650	VIT_15s0021g02570	VIT_14s0068g00200	VIT_07s0129g00220	VIT_05s0077g00280	VIT_13s0074g00160	VIT_17s0000g02680	VIT_04s0023g03070	VIT_18s0001g12830	VIT_12s0035g00380	VIT_01s0011g05260	VIT_06s0009g01930	VIT_18s0001g14100	VIT_16s0022g00470	VIT_11s0118g00090	VIT_11s0118g00570	VIT_12s0034g02560	VIT_13s0074g00500	VIT_12s0035g01970	VIT_18s0001g02420	VIT_16s0022g00510	VIT_04s0023g03070	VIT_18s0001g12700	VIT_03s0063g01960	VIT_19s0014g02240
VIT_07s0031g02200	VIT_01s0127g00400	VIT_15s0046g00290	VIT_04s0023g02290	VIT_16s0022g00030	VIT_12s0059g00650	VIT_10s0003g01050	VIT_11s0016g02350	VIT_08s0040g01190	VIT_13s0019g01010	VIT_12s0028g02990	VIT_14s0060g00810	VIT_14s0066g02060	VIT_11s0016g04630	VIT_13s0064g00840	VIT_08s0007g05060	VIT_07s0005g06420	VIT_01s0026g01440	VIT_06s0004g04640	VIT_02s0087g00280	VIT_10s0003g01560	VIT_08s0007g02260	VIT_17s0000g03910	VIT_00s0260g00070	VIT_11s0016g02900	VIT_04s0023g01010	VIT_01s0011g01160	VIT_07s0104g00090
VIT_11s0016g00640	VIT_05s0020g00420	VIT_10s0003g04100	VIT_18s0001g12900	VIT_16s0039g01030	VIT_17s0000g09800	VIT_05s0094g00920	VIT_19s0093g00310	VIT_15s0048g00350	VIT_18s0001g10450	VIT_16s0050g00100	VIT_07s0031g00920	VIT_11s0016g03900	VIT_13s0019g01890	VIT_02s0087g00910	VIT_11s0016g03160	VIT_08s0007g04990	VIT_02s0087g00760	VIT_19s0014g02120	VIT_14s0068g00680	VIT_00s0414g00030	VIT_10s0003g00960	VIT_12s0134g00650	VIT_00s0769g00010	VIT_09s0070g00480	VIT_05s0102g00620	VIT_08s0007g05800	VIT_04s0008g05210
VIT_14s0083g00960	VIT_12s0028g03390	VIT_18s0001g06390	VIT_06s0004g08150	VIT_11s0149g00280	VIT_05s0049g00970	VIT_08s0007g06520	VIT_07s0005g00010	VIT_08s0007g08410	VIT_18s0001g14100	VIT_10s0003g01050	VIT_01s0011g00250	VIT_04s0008g02740	VIT_16s0039g02550	VIT_12s0035g00340	VIT_14s0066g02320	VIT_11s0052g00630	VIT_04s0069g00930	VIT_09s0002g03610	VIT_03s0038g00670	VIT_07s0005g04110	VIT_06s0004g04400	VIT_16s0115g00340	VIT_13s0101g00220	VIT_18s0001g10040	VIT_06s0004g08330	VIT_07s0151g00640	VIT_03s0091g00690
VIT_18s0001g03540	VIT_19s0015g00530	VIT_10s0003g04560	VIT_07s0130g00250	VIT_19s0014g04940	VIT_00s0199g00310	VIT_14s0068g00230	VIT_13s0064g01470	VIT_19s0014g02170	VIT_17s0000g05990	VIT_19s0090g01440	VIT_16s0039g01580	VIT_02s0087g00710	VIT_11s0118g00160	VIT_11s0016g03900	VIT_14s0108g00430	VIT_19s0014g02120	VIT_07s0130g00180	VIT_14s0068g01380	VIT_04s0023g03010	VIT_14s0066g01730	VIT_11s0118g00390	VIT_17s0000g03940	VIT_12s0035g02010	VIT_11s0016g03640	VIT_14s0030g01150	VIT_08s0007g01510	VIT_07s0129g00670
VIT_02s0154g00010	VIT_08s0040g02030	VIT_19s0085g00010	VIT_08s0040g01710	VIT_00s0527g00010	VIT_19s0014g02390	VIT_18s0001g08250	VIT_18s0001g11090	VIT_01s0010g02740	VIT_01s0026g02190	VIT_14s0068g00230	VIT_07s0005g04420	VIT_13s0019g04600	VIT_04s0023g02840	VIT_12s0035g00330	VIT_07s0031g02550	VIT_16s0039g02210	VIT_14s0108g01060	VIT_18s0001g08230	VIT_18s0122g00960	VIT_07s0005g01030	VIT_12s0035g01780	VIT_00s0847g00020	VIT_11s0037g01180	VIT_17s0000g07570	VIT_13s0019g05320	VIT_17s0000g06970	VIT_13s0067g01070
VIT_12s0028g02350	VIT_08s0032g00910	VIT_04s0023g03230	VIT_08s0007g04310	VIT_06s0004g06860	VIT_06s0061g01290	VIT_01s0011g06330	VIT_06s0004g05020	VIT_02s0025g03660	VIT_04s0023g01370	VIT_15s0046g00220	VIT_15s0046g01210	VIT_09s0002g02430	VIT_10s0003g00960	VIT_14s0066g02060	VIT_02s0087g00840	VIT_12s0035g01140	VIT_16s0022g01780	VIT_13s0067g02190	VIT_08s0007g07600	VIT_00s0414g00060	VIT_02s0025g02570	VIT_00s0372g00040	VIT_01s0010g01260	VIT_14s0108g00440	VIT_14s0128g00730	VIT_01s0010g00950	VIT_01s0010g03850
VIT_01s0011g05180	VIT_08s0040g01970	VIT_08s0032g01110	VIT_06s0004g02680	VIT_07s0005g05010	VIT_14s0006g01510	VIT_11s0052g00630	VIT_07s0031g01530	VIT_11s0052g01110	VIT_08s0007g05060	VIT_17s0000g08260	VIT_05s0077g00280	VIT_16s0050g02480	VIT_18s0089g00380	VIT_12s0035g00350	VIT_06s0061g00260	VIT_07s0031g01700	VIT_16s0039g02130	VIT_12s0035g00380	VIT_08s0007g00750	VIT_02s0025g01920	VIT_18s0001g12210	VIT_00s0271g00060	VIT_19s0090g00080	VIT_16s0022g00440	VIT_16s0022g01210	VIT_06s0061g00380	VIT_18s0041g01220
VIT_08s0007g06060	VIT_06s0004g03050	VIT_06s0004g07700	VIT_14s0060g00480	VIT_04s0008g05870	VIT_14s0081g00720	VIT_10s0071g00660	VIT_13s0019g02050	VIT_17s0000g01790	VIT_11s0016g03160	VIT_01s0011g06330	VIT_09s0002g04490	VIT_01s0010g02440	VIT_06s0004g04400	VIT_12s0035g00380	VIT_18s0001g11390	VIT_08s0058g00560	VIT_18s0001g09690	VIT_12s0035g00340	VIT_06s0004g02690	VIT_12s0059g00990	VIT_15s0048g01700	VIT_19s0014g04900	VIT_19s0177g00040	VIT_17s0000g04330	VIT_14s0006g00450	VIT_13s0158g00340	VIT_00s0463g00020
VIT_05s0077g01150	VIT_00s0527g00030	VIT_09s0002g02120	VIT_14s0108g01110	VIT_00s0370g00040	VIT_01s0011g06200	VIT_12s0057g01350	VIT_06s0004g05180	VIT_16s0039g02040	VIT_14s0066g02320	VIT_01s0011g05790	VIT_07s0005g00210	VIT_09s0002g05600	VIT_04s0008g04920	VIT_07s0005g00200	VIT_02s0154g00070	VIT_17s0000g06860	VIT_01s0011g00760	VIT_12s0035g00350	VIT_18s0001g12830	VIT_11s0037g00530	VIT_04s0008g02960	VIT_00s0372g00070	VIT_19s0090g00120	VIT_06s0004g03400	VIT_12s0028g03350	VIT_01s0010g00240	VIT_08s0007g01290
VIT_11s0016g02200	VIT_08s0040g02070	VIT_18s0001g12550	VIT_08s0007g05100	VIT_02s0087g01010	VIT_07s0104g01620	VIT_01s0146g00360	VIT_04s0023g03510	VIT_00s1674g00010	VIT_14s0108g00430	VIT_04s0023g03130	VIT_17s0000g00900	VIT_09s0002g05490	VIT_02s0087g00460	VIT_04s0008g02740	VIT_15s0048g00550	VIT_11s0052g01800	VIT_02s0025g04860	VIT_17s0000g06050	VIT_15s0021g01010	VIT_19s0015g00730	VIT_16s0039g00920	VIT_19s0014g04930	VIT_15s0048g01490	VIT_15s0021g01390	VIT_09s0054g00530	VIT_11s0016g02380	VIT_14s0060g00240
VIT_11s0016g00280	VIT_18s0001g10040	VIT_06s0004g06290	VIT_19s0085g00370	VIT_17s0000g01490	VIT_16s0022g02380	VIT_11s0016g02410	VIT_05s0020g03490	VIT_00s0194g00110	VIT_06s0061g00410	VIT_00s0516g00030	VIT_07s0031g00680	VIT_09s0002g05590	VIT_02s0025g02570	VIT_17s0000g10260	VIT_15s0046g01050	VIT_06s0004g07900	VIT_17s0000g01690	VIT_01s0026g02340	VIT_01s0010g00600	VIT_18s0089g00210	VIT_18s0001g11560	VIT_13s0064g00390	VIT_00s0194g00190	VIT_12s0059g02640	VIT_13s0084g00310	VIT_08s0007g03900	VIT_15s0046g02260
VIT_18s0001g10690	VIT_12s0059g00570	VIT_18s0001g08430	VIT_03s0038g00670	VIT_13s0074g00450	VIT_10s0003g04040	VIT_00s1353g00010	VIT_18s0001g02700	VIT_15s0048g00360	VIT_07s0031g02550	VIT_00s0216g00040	VIT_02s0025g03520	VIT_09s0002g05570	VIT_15s0048g02900	VIT_12s0057g01140	VIT_01s0011g00590	VIT_18s0001g12310	VIT_00s1217g00010	VIT_13s0147g00120	VIT_13s0019g02810	VIT_00s0340g00050	VIT_11s0016g04960	VIT_17s0000g05040	VIT_13s0019g01440	VIT_11s0052g00630	VIT_14s0068g00740	VIT_01s0127g00540	VIT_18s0166g00020
VIT_06s0009g00410	VIT_04s0023g00400	VIT_18s0122g01340	VIT_06s0061g00280	VIT_12s0178g00040	VIT_10s0116g01760	VIT_00s0194g00070	VIT_09s0002g06970	VIT_08s0007g00060	VIT_05s0020g00680	VIT_18s0001g08230	VIT_06s0004g05020	VIT_09s0002g05560	VIT_02s0025g04850	VIT_05s0136g00140	VIT_00s0220g00110	VIT_13s0067g02190	VIT_08s0007g01930	VIT_07s0031g02310	VIT_05s0020g02310	VIT_07s0005g00740	VIT_15s0046g02160	VIT_12s0028g03900	VIT_18s0001g14640	VIT_17s0000g06860	VIT_11s0037g00660	VIT_15s0024g00050	VIT_14s0068g00330
VIT_08s0105g00230	VIT_09s0002g03250	VIT_18s0001g13740	VIT_08s0056g00190	VIT_12s0035g00420	VIT_12s0059g02360	VIT_18s0001g08230	VIT_08s0105g00430	VIT_16s0100g01210	VIT_13s0074g00690	VIT_19s0014g00280	VIT_07s0031g01530	VIT_18s0001g13610	VIT_06s0004g05380	VIT_04s0008g02560	VIT_08s0056g01520	VIT_12s0035g00350	VIT_12s0057g01240	VIT_09s0002g08590	VIT_15s0046g01190	VIT_00s0340g00060	VIT_06s0004g05430	VIT_03s0063g01760	VIT_04s0008g02680	VIT_02s0012g01410	VIT_18s0075g00480	VIT_19s0027g00710	VIT_13s0067g03140
VIT_18s0001g11180	VIT_10s0003g01050	VIT_05s0077g01140	VIT_13s0074g00150	VIT_12s0035g00410	VIT_15s0021g00140	VIT_05s0077g02260	VIT_17s0000g01010	VIT_18s0122g00510	VIT_06s0004g06560	VIT_15s0046g01230	VIT_07s0151g00640	VIT_14s0068g01960	VIT_17s0000g09100	VIT_18s0001g01620	VIT_07s0005g04130	VIT_14s0030g00540	VIT_17s0000g00920	VIT_04s0044g00020	VIT_03s0038g04570	VIT_08s0007g04820	VIT_17s0000g00920	VIT_00s0203g00020	VIT_09s0002g00630	VIT_05s0051g00380	VIT_03s0063g00310	VIT_14s0006g02830	VIT_15s0046g01140
VIT_18s0122g01340	VIT_08s0007g06520	VIT_05s0102g01120	VIT_18s0001g12830	VIT_08s0058g00780	VIT_17s0000g06200	VIT_10s0003g02190	VIT_06s0009g02640	VIT_01s0010g01130	VIT_02s0087g00840	VIT_12s0035g00350	VIT_12s0034g01240	VIT_18s0001g04980	VIT_08s0007g01930	VIT_13s0067g03210	VIT_11s0016g05380	VIT_14s0030g00570	VIT_12s0057g00400	VIT_04s0008g04920	VIT_18s0089g00410	VIT_17s0000g09810	VIT_11s0016g04830	VIT_05s0049g00720	VIT_19s0014g02240	VIT_07s0151g00700	VIT_08s0007g08900	VIT_17s0000g08370	VIT_09s0054g00530
VIT_05s0020g01090	VIT_14s0108g00440	VIT_09s0002g08100	VIT_14s0060g00810	VIT_12s0059g00800	VIT_03s0038g00690	VIT_11s0016g02360	VIT_17s0000g04030	VIT_09s0002g08460	VIT_08s0032g00790	VIT_12s0035g00330	VIT_04s0023g01140	VIT_14s0068g00640	VIT_04s0210g00190	VIT_18s0001g10500	VIT_14s0030g00740	VIT_05s0029g00850	VIT_14s0066g01210	VIT_06s0009g03630	VIT_05s0029g01140	VIT_02s0025g00260	VIT_15s0021g01560	VIT_18s0001g11610	VIT_07s0129g00670	VIT_07s0005g02730	VIT_04s0008g05470	VIT_01s0011g06630	VIT_12s0134g00400
VIT_13s0156g00210	VIT_06s0009g02020	VIT_00s0252g00130	VIT_14s0066g02350	VIT_17s0000g00710	VIT_00s0186g00090	VIT_12s0035g00340	VIT_03s0063g02660	VIT_10s0003g03750	VIT_00s0625g00020	VIT_12s0035g00340	VIT_04s0008g04710	VIT_15s0048g02240	VIT_17s0000g00920	VIT_18s0001g07780	VIT_01s0146g00100	VIT_14s0068g02300	VIT_03s0088g00500	VIT_10s0003g03170	VIT_11s0016g02350	VIT_09s0054g01080	VIT_16s0039g00740	VIT_03s0017g01460	VIT_00s0299g00100	VIT_13s0073g00140	VIT_06s0004g06950	VIT_06s0004g01130	VIT_01s0026g01030
VIT_01s0010g03850	VIT_02s0025g03680	VIT_17s0000g05520	VIT_16s0022g00670	VIT_04s0069g01060	VIT_08s0007g00780	VIT_14s0030g00520	VIT_06s0004g06550	VIT_19s0014g02080	VIT_06s0061g00350	VIT_12s0035g00380	VIT_18s0001g03990	VIT_12s0059g01080	VIT_05s0020g03430	VIT_03s0038g01650	VIT_14s0060g02330	VIT_11s0052g00390	VIT_05s0051g00830	VIT_18s0001g00950	VIT_18s0001g01690	VIT_13s0047g00230	VIT_04s0008g02700	VIT_18s0001g11730	VIT_14s0060g00240	VIT_18s0001g08230	VIT_07s0005g02470	VIT_19s0085g01030	VIT_01s0010g02220
VIT_18s0001g11130	VIT_03s0088g00380	VIT_08s0007g05980	VIT_11s0016g05770	VIT_16s0100g00380	VIT_08s0007g08390	VIT_14s0030g00140	VIT_16s0050g00020	VIT_15s0048g02990	VIT_10s0116g01910	VIT_01s0026g02340	VIT_06s0004g01250	VIT_01s0010g02580	VIT_07s0005g02230	VIT_00s0291g00100	VIT_04s0069g01120	VIT_02s0033g00670	VIT_05s0124g00400	VIT_04s0008g06570	VIT_11s0052g00120	VIT_15s0046g02000	VIT_18s0075g00280	VIT_05s0020g04670	VIT_09s0054g00530	VIT_12s0028g02400	VIT_15s0048g02410	VIT_08s0040g01130	VIT_06s0004g05090
VIT_18s0001g10800	VIT_00s0373g00010	VIT_01s0010g03850	VIT_00s0301g00190	VIT_15s0046g00470	VIT_17s0000g08670	VIT_17s0000g09230	VIT_19s0085g01100	VIT_11s0016g03900	VIT_06s0009g03810	VIT_00s0256g00030	VIT_09s0002g06970	VIT_00s0264g00030	VIT_12s0035g00060	VIT_17s0000g05120	VIT_03s0063g01880	VIT_02s0033g00870	VIT_18s0001g14980	VIT_13s0067g02120	VIT_19s0014g02730	VIT_16s0022g00940	VIT_02s0154g00050	VIT_12s0057g00060	VIT_01s0010g02220	VIT_14s0066g02040	VIT_10s0003g02000	VIT_04s0023g00730	VIT_05s0077g01970
VIT_04s0008g01660	VIT_06s0004g05870	VIT_00s0698g00010	VIT_07s0031g00920	VIT_18s0001g07810	VIT_01s0011g05150	VIT_08s0007g05520	VIT_14s0060g00720	VIT_16s0039g02110	VIT_11s0016g03710	VIT_00s0174g00070	VIT_17s0119g00350	VIT_06s0004g06680	VIT_05s0077g01250	VIT_16s0100g00350	VIT_04s0079g00790	VIT_02s0033g00660	VIT_03s0038g00670	VIT_04s0008g07040	VIT_08s0007g00840	VIT_04s0044g01000	VIT_00s0357g00060	VIT_14s0006g02950	VIT_08s0040g02950	VIT_11s0016g01650	VIT_15s0046g01550	VIT_02s0025g02960	VIT_08s0040g02950
VIT_11s0016g01070	VIT_05s0020g00620	VIT_19s0014g03090	VIT_01s0146g00060	VIT_08s0007g00390	VIT_00s0333g00050	VIT_13s0019g04030	VIT_03s0097g00530	VIT_14s0066g02060	VIT_02s0012g01270	VIT_17s0000g00210	VIT_17s0000g02430	VIT_13s0067g00930	VIT_04s0023g02130	VIT_02s0025g00970	VIT_09s0002g07120	VIT_02s0033g00700	VIT_16s0022g01770	VIT_00s0480g00100	VIT_06s0004g05180	VIT_09s0002g00320	VIT_17s0000g03280	VIT_12s0028g03550	VIT_14s0083g01110	VIT_00s0256g00030	VIT_09s0002g06820	VIT_16s0115g00340	VIT_13s0067g00260
VIT_04s0008g02860	VIT_01s0010g03540	VIT_14s0083g00530	VIT_07s0005g04420	VIT_11s0016g05410	VIT_01s0011g05120	VIT_05s0077g02010	VIT_16s0050g02520	VIT_01s0011g02220	VIT_16s0050g02620	VIT_14s0030g00140	VIT_01s0011g05200	VIT_08s0007g04890	VIT_14s0060g00810	VIT_19s0015g00050	VIT_13s0019g04470	VIT_15s0048g00660	VIT_02s0012g01170	VIT_05s0062g01270	VIT_11s0037g00290	VIT_02s0154g00600	VIT_08s0007g07480	VIT_05s0020g04780	VIT_16s0013g01070	VIT_16s0050g01530	VIT_18s0001g07320	VIT_13s0064g00390	VIT_09s0002g03020
VIT_08s0056g01710	VIT_18s0001g08700	VIT_14s0066g01920	VIT_08s0007g05990	VIT_16s0039g02300	VIT_11s0037g00690	VIT_13s0106g00250	VIT_16s0039g00660	VIT_04s0008g02740	VIT_18s0072g00380	VIT_02s0012g01010	VIT_17s0000g01010	VIT_19s0015g01740	VIT_05s0077g00840	VIT_16s0022g00630	VIT_13s0019g04480	VIT_02s0154g00390	VIT_15s0107g00130	VIT_10s0116g00560	VIT_01s0137g00210	VIT_01s0127g00400	VIT_14s0066g00410	VIT_01s0011g03110	VIT_11s0016g04080	VIT_16s0050g01550	VIT_14s0060g00160	VIT_11s0016g02760	VIT_09s0002g05920
VIT_14s0030g00140	VIT_08s0040g02590	VIT_19s0014g05190	VIT_03s0063g02490	VIT_17s0000g04540	VIT_17s0053g00990	VIT_00s0698g00010	VIT_10s0003g04000	VIT_07s0005g02430	VIT_06s0004g00620	VIT_08s0007g05520	VIT_08s0007g01680	VIT_00s0662g00010	VIT_16s0039g01700	VIT_09s0002g05490	VIT_19s0015g00160	VIT_19s0090g00580	VIT_00s0324g00060	VIT_13s0064g00050	VIT_13s0019g04200	VIT_09s0002g00330	VIT_16s0022g01770	VIT_02s0012g01960	VIT_16s0013g00970	VIT_14s0066g00760	VIT_14s0060g00170	VIT_00s1466g00010	VIT_03s0132g00080
VIT_19s0014g02870	VIT_09s0002g04480	VIT_02s0025g01770	VIT_18s0001g12840	VIT_00s0805g00010	VIT_05s0094g00480	VIT_04s0008g04920	VIT_03s0038g04500	VIT_13s0067g00720	VIT_10s0003g04580	VIT_05s0020g03010	VIT_05s0102g01170	VIT_12s0028g02660	VIT_13s0019g04500	VIT_09s0002g05400	VIT_08s0007g06710	VIT_07s0005g02200	VIT_01s0011g00240	VIT_12s0059g02010	VIT_00s0499g00030	VIT_11s0052g01280	VIT_16s0013g02100	VIT_03s0038g03410	VIT_04s0008g03400	VIT_10s0071g00860	VIT_00s0625g00020	VIT_18s0001g08160	VIT_01s0150g00300
VIT_19s0015g00710	VIT_04s0043g00290	VIT_19s0014g00100	VIT_19s0085g00810	VIT_17s0000g09130	VIT_14s0108g00740	VIT_13s0067g00110	VIT_14s0006g00300	VIT_00s0203g00100	VIT_01s0011g00590	VIT_08s0032g00510	VIT_19s0090g00610	VIT_08s0105g00460	VIT_19s0014g02650	VIT_09s0002g05600	VIT_11s0052g00620	VIT_03s0063g00720	VIT_04s0023g02130	VIT_18s0157g00190	VIT_06s0004g01250	VIT_11s0052g01270	VIT_13s0019g03060	VIT_08s0007g02940	VIT_16s0013g00980	VIT_11s0118g00160	VIT_01s0011g04820	VIT_16s0013g00440	VIT_07s0031g02200
VIT_05s0049g00050	VIT_03s0038g00350	VIT_05s0094g00350	VIT_18s0001g00560	VIT_16s0039g02220	VIT_14s0108g01470	VIT_15s0048g01540	VIT_17s0000g02050	VIT_19s0015g00640	VIT_01s0011g00600	VIT_04s0008g04920	VIT_01s0011g03440	VIT_05s0020g03080	VIT_14s0066g01270	VIT_13s0074g00660	VIT_17s0000g03280	VIT_06s0009g00980	VIT_18s0001g12830	VIT_08s0007g04800	VIT_05s0020g00930	VIT_05s0062g00240	VIT_16s0050g02210	VIT_07s0129g00210	VIT_16s0013g00990	VIT_00s0324g00010	VIT_09s0002g05730	VIT_03s0063g01760	VIT_11s0016g05640
VIT_05s0049g00010	VIT_00s0218g00050	VIT_05s0094g00300	VIT_05s0077g00280	VIT_13s0047g00210	VIT_14s0030g00260	VIT_13s0074g00390	VIT_01s0150g00320	VIT_13s0019g04600	VIT_10s0003g00300	VIT_15s0048g01540	VIT_18s0001g02200	VIT_09s0002g04170	VIT_00s0220g00070	VIT_13s0074g00700	VIT_14s0066g01550	VIT_13s0106g00440	VIT_07s0141g00830	VIT_05s0020g00670	VIT_06s0004g02390	VIT_11s0052g01190	VIT_09s0002g02320	VIT_16s0050g02510	VIT_16s0013g00950	VIT_01s0010g03210	VIT_00s0854g00030	VIT_03s0017g01710	VIT_19s0014g00080
VIT_05s0049g00040	VIT_16s0022g01820	VIT_04s0008g00120	VIT_14s0066g00450	VIT_12s0059g02520	VIT_05s0020g00480	VIT_03s0063g01560	VIT_19s0090g01000	VIT_07s0005g02660	VIT_14s0108g01670	VIT_13s0074g00390	VIT_03s0097g00570	VIT_06s0004g00750	VIT_08s0007g02120	VIT_10s0116g01920	VIT_14s0083g00110	VIT_07s0031g03150	VIT_09s0002g02340	VIT_02s0025g00560	VIT_12s0059g00640	VIT_11s0052g01300	VIT_16s0039g01700	VIT_07s0031g01710	VIT_16s0013g01050	VIT_01s0011g00490	VIT_10s0003g01030	VIT_00s0802g00010	VIT_16s0013g01080
VIT_04s0008g05610	VIT_06s0004g03810	VIT_18s0122g00630	VIT_11s0016g02350	VIT_15s0046g01930	VIT_11s0052g01560	VIT_08s0058g01000	VIT_00s0283g00030	VIT_00s0291g00100	VIT_07s0005g04130	VIT_03s0063g01560	VIT_19s0085g01100	VIT_16s0050g00870	VIT_06s0080g00420	VIT_10s0116g01910	VIT_12s0059g00590	VIT_02s0033g00800	VIT_05s0049g01130	VIT_04s0044g01110	VIT_18s0001g08550	VIT_01s0150g00460	VIT_08s0040g00680	VIT_12s0059g00880	VIT_11s0052g01650	VIT_02s0033g00870	VIT_18s0001g10120	VIT_01s0011g01170	VIT_16s0013g00980
VIT_01s0011g06440	VIT_18s0001g07550	VIT_16s0039g01670	VIT_02s0025g03600	VIT_00s0733g00010	VIT_05s0049g01410	VIT_03s0088g01180	VIT_12s0034g02390	VIT_07s0005g04460	VIT_19s0090g00990	VIT_03s0091g00100	VIT_00s0510g00040	VIT_10s0116g00820	VIT_12s0028g02160	VIT_00s0983g00010	VIT_17s0000g08990	VIT_03s0063g01160	VIT_06s0080g00030	VIT_01s0010g02460	VIT_16s0039g00520	VIT_08s0007g04950	VIT_01s0010g00600	VIT_01s0026g02470	VIT_11s0016g00200	VIT_01s0011g00760	VIT_08s0007g01650	VIT_16s0013g00450	VIT_16s0013g01120
VIT_04s0023g02360	VIT_13s0067g02400	VIT_00s0324g00070	VIT_01s0026g01340	VIT_00s0187g00340	VIT_02s0012g01160	VIT_08s0007g00890	VIT_13s0019g00860	VIT_09s0002g02430	VIT_11s0016g00770	VIT_04s0023g03650	VIT_05s0077g01010	VIT_01s0010g02770	VIT_07s0005g03530	VIT_19s0027g01210	VIT_00s0220g00130	VIT_18s0001g03910	VIT_13s0019g05160	VIT_04s0044g01120	VIT_17s0000g04030	VIT_12s0134g00160	VIT_09s0002g02340	VIT_08s0007g04790	VIT_11s0052g00800	VIT_13s0019g04030	VIT_10s0042g00560	VIT_18s0001g11310	VIT_10s0003g00140
VIT_07s0130g00400	VIT_08s0040g02400	VIT_03s0017g01040	VIT_07s0005g00010	VIT_18s0122g00990	VIT_01s0127g00710	VIT_11s0016g02180	VIT_00s1569g00010	VIT_16s0050g02480	VIT_08s0007g06520	VIT_01s0010g02460	VIT_13s0073g00580	VIT_18s0001g12840	VIT_14s0036g00540	VIT_11s0052g00240	VIT_01s0011g00160	VIT_06s0004g06830	VIT_16s0022g02080	VIT_06s0009g00680	VIT_03s0097g00530	VIT_10s0003g02440	VIT_13s0019g04500	VIT_10s0116g00940	VIT_04s0044g01560	VIT_05s0077g02010	VIT_05s0020g03360	VIT_18s0001g06270	VIT_16s0013g01050
VIT_14s0068g02190	VIT_07s0005g01060	VIT_18s0001g14610	VIT_17s0000g03490	VIT_12s0035g01700	VIT_08s0007g07380	VIT_00s0225g00090	VIT_04s0008g01570	VIT_19s0015g00020	VIT_05s0049g01740	VIT_00s0475g00010	VIT_14s0171g00160	VIT_10s0003g03950	VIT_18s0001g03760	VIT_14s0083g00070	VIT_14s0083g01100	VIT_17s0000g05110	VIT_03s0038g04570	VIT_14s0108g01520	VIT_16s0050g02520	VIT_00s0386g00050	VIT_16s0022g02080	VIT_13s0067g02300	VIT_15s0048g01400	VIT_03s0063g00830	VIT_14s0030g01750	VIT_18s0001g11170	VIT_16s0013g00900
VIT_09s0002g06980	VIT_04s0008g02770	VIT_16s0098g01860	VIT_13s0064g01470	VIT_05s0020g01750	VIT_09s0002g00690	VIT_08s0058g00980	VIT_19s0085g01050	VIT_19s0015g00050	VIT_15s0021g01870	VIT_08s0007g08840	VIT_17s0000g01680	VIT_11s0052g00620	VIT_00s0274g00080	VIT_10s0003g00300	VIT_00s0322g00030	VIT_01s0010g03560	VIT_05s0094g00990	VIT_01s0026g00980	VIT_10s0003g04000	VIT_11s0052g01180	VIT_08s0007g04250	VIT_05s0077g02320	VIT_18s0001g09360	VIT_16s0100g00010	VIT_02s0025g04180	VIT_01s0146g00280	VIT_16s0013g01000
VIT_01s0011g01480	VIT_03s0038g04720	VIT_00s0194g00070	VIT_07s0151g00250	VIT_16s0039g01070	VIT_16s0098g01280	VIT_14s0066g01850	VIT_13s0019g02740	VIT_02s0087g00770	VIT_18s0001g09340	VIT_17s0000g07640	VIT_19s0090g01000	VIT_14s0068g01760	VIT_07s0005g00210	VIT_01s0137g00810	VIT_17s0053g00990	VIT_18s0001g00030	VIT_08s0007g02120	VIT_05s0094g00360	VIT_01s0011g03660	VIT_11s0052g01260	VIT_10s0003g03180	VIT_04s0079g00810	VIT_16s0022g00540	VIT_18s0001g10800	VIT_08s0007g08780	VIT_10s0042g01250	VIT_12s0028g03270
VIT_01s0011g02860	VIT_05s0020g04880	VIT_17s0000g00210	VIT_04s0008g05100	VIT_03s0038g01950	VIT_02s0025g05160	VIT_04s0008g07040	VIT_00s0323g00020	VIT_02s0025g02160	VIT_12s0057g01270	VIT_00s0371g00100	VIT_01s0011g04990	VIT_18s0001g15410	VIT_17s0000g09160	VIT_15s0048g02240	VIT_06s0004g07970	VIT_07s0141g00890	VIT_12s0057g01480	VIT_11s0016g02800	VIT_02s0025g02140	VIT_08s0040g02030	VIT_19s0014g02650	VIT_12s0057g00070	VIT_07s0031g02550	VIT_16s0022g02440	VIT_12s0059g00190	VIT_08s0040g01950	VIT_16s0013g01090
VIT_19s0014g04980	VIT_14s0081g00480	VIT_06s0004g04030	VIT_02s0012g00760	VIT_10s0003g00370	VIT_04s0008g06870	VIT_00s0480g00100	VIT_02s0025g00280	VIT_18s0166g00310	VIT_11s0016g00100	VIT_05s0077g00690	VIT_11s0016g00650	VIT_00s0187g00260	VIT_18s0001g01660	VIT_13s0067g00930	VIT_17s0000g06360	VIT_19s0015g00070	VIT_14s0108g00940	VIT_06s0004g06660	VIT_16s0050g01150	VIT_04s0023g03070	VIT_08s0007g02120	VIT_12s0057g00150	VIT_00s0317g00140	VIT_18s0089g00380		VIT_08s0007g04790	VIT_19s0014g04650
VIT_08s0040g01470	VIT_13s0067g01180	VIT_08s0040g00130	VIT_03s0063g01460	VIT_18s0001g12350	VIT_12s0057g00600	VIT_00s0480g00070	VIT_04s0008g01550	VIT_18s0076g00380	VIT_09s0002g07120	VIT_17s0000g00120	VIT_00s0670g00010	VIT_07s0005g03780	VIT_18s0001g06580	VIT_08s0007g06520	VIT_13s0019g01650	VIT_16s0039g00840	VIT_19s0090g00920	VIT_12s0055g01180	VIT_08s0007g00130	VIT_15s0048g01750	VIT_02s0025g02790	VIT_18s0001g03620	VIT_08s0217g00090	VIT_13s0084g00130		VIT_14s0060g01320	VIT_04s0008g01070
VIT_04s0008g00440	VIT_18s0001g15520	VIT_08s0056g01300	VIT_03s0017g00940	VIT_01s0146g00140	VIT_19s0027g01680	VIT_00s0480g00060	VIT_09s0002g00640	VIT_18s0166g00320	VIT_00s1847g00010	VIT_00s2563g00010	VIT_13s0019g00860	VIT_01s0026g00220	VIT_07s0005g04400	VIT_13s0019g01240	VIT_06s0004g04860	VIT_16s0050g00480	VIT_02s0025g02790	VIT_14s0108g01590	VIT_04s0008g01110	VIT_11s0016g02900	VIT_17s0000g03690	VIT_18s0001g06240	VIT_01s0011g04820	VIT_05s0049g01400		VIT_14s0060g01300	VIT_12s0134g00240
VIT_03s0038g02110	VIT_05s0124g00530	VIT_00s0291g00090	VIT_07s0151g01000	VIT_04s0008g00450	VIT_01s0010g03860	VIT_10s0116g00560	VIT_08s0007g00130	VIT_09s0002g05530	VIT_03s0038g01440	VIT_11s0016g00470	VIT_04s0008g01530	VIT_11s0016g00900	VIT_05s0020g03440	VIT_01s0011g05400	VIT_01s0011g03450	VIT_16s0100g00600	VIT_10s0116g01730	VIT_14s0108g01620	VIT_13s0019g02840	VIT_09s0070g00480	VIT_13s0019g03350	VIT_18s0001g06340	VIT_10s0003g00260	VIT_07s0005g03780		VIT_03s0038g02280	VIT_11s0016g00200
VIT_04s0079g00810	VIT_08s0007g06950	VIT_05s0020g03070	VIT_00s0245g00050	VIT_04s0008g01500	VIT_18s0001g02100	VIT_04s0079g00220	VIT_13s0019g01430	VIT_09s0002g05590	VIT_03s0091g00870	VIT_07s0005g00750	VIT_16s0022g00510	VIT_05s0062g01000	VIT_10s0092g00150	VIT_19s0015g01740	VIT_08s0032g00890	VIT_15s0048g01690	VIT_08s0040g00670	VIT_01s0011g00690	VIT_13s0019g02930	VIT_12s0028g03390	VIT_02s0109g00080	VIT_01s0026g02190	VIT_18s0001g08100	VIT_17s0000g08450		VIT_15s0046g02110	VIT_15s0048g02070
VIT_07s0104g01360	VIT_01s0011g00490	VIT_05s0020g03060	VIT_01s0011g01520	VIT_04s0008g01520	VIT_11s0016g02490	VIT_06s0009g03350	VIT_16s0022g00510	VIT_09s0002g05570	VIT_03s0038g04570	VIT_06s0004g02410	VIT_09s0002g00640	VIT_14s0030g02020	VIT_07s0005g02370	VIT_08s0032g00050	VIT_16s0022g02170	VIT_04s0008g03770	VIT_14s0108g01560	VIT_14s0108g01600	VIT_16s0022g00510	VIT_08s0040g02070	VIT_01s0127g00420	VIT_03s0132g00100	VIT_16s0100g00360	VIT_11s0065g00100		VIT_10s0116g00940	VIT_04s0044g01560
VIT_02s0025g01170	VIT_06s0009g00810	VIT_15s0048g01670	VIT_08s0105g00430	VIT_00s2341g00010	VIT_11s0016g05380	VIT_18s0001g14030	VIT_13s0019g02780	VIT_09s0002g05600	VIT_07s0129g01090	VIT_18s0001g08290	VIT_02s0154g00490	VIT_05s0062g00980	VIT_00s0253g00090	VIT_00s0662g00010	VIT_14s0066g01270	VIT_08s0058g01000	VIT_17s0000g09920	VIT_14s0108g01610	VIT_06s0004g04470	VIT_18s0001g10040	VIT_01s0011g04800	VIT_03s0038g03960	VIT_03s0063g02520	VIT_02s0109g00430		VIT_13s0067g02300	VIT_10s0003g01410
VIT_02s0025g04560	VIT_13s0106g00440	VIT_18s0001g09650	VIT_06s0004g01250	VIT_00s0279g00050	VIT_06s0061g00680	VIT_06s0004g03140	VIT_18s0001g01030	VIT_09s0002g05490	VIT_14s0060g00690	VIT_01s0011g01160	VIT_00s1286g00010	VIT_05s0062g01010	VIT_14s0030g01340	VIT_12s0028g02660	VIT_14s0068g01120	VIT_18s0001g00950	VIT_06s0004g06640	VIT_07s0031g00060	VIT_13s0019g02780	VIT_11s0016g03640	VIT_14s0030g02240	VIT_01s0026g00820	VIT_00s0338g00030	VIT_06s0004g02590		VIT_18s0001g04600	VIT_18s0041g01290
VIT_01s0026g02480	VIT_15s0024g00070	VIT_01s0244g00170	VIT_08s0040g02280	VIT_03s0038g02340	VIT_08s0007g00710	VIT_08s0217g00100	VIT_08s0007g00740	VIT_09s0002g05400	VIT_01s0127g00440	VIT_03s0091g00240	VIT_04s0008g01550	VIT_08s0007g08310	VIT_07s0005g05610	VIT_18s0001g11150	VIT_08s0056g00560	VIT_14s0083g00520	VIT_06s0004g06130	VIT_17s0000g06590	VIT_06s0004g04510	VIT_14s0108g00440	VIT_17s0000g09160	VIT_03s0091g00310	VIT_08s0007g06710	VIT_06s0061g00590		VIT_17s0000g06040	VIT_11s0052g00800
VIT_03s0063g02700	VIT_17s0000g01690	VIT_14s0066g01020	VIT_12s0059g00640	VIT_00s0181g00260	VIT_15s0046g03680	VIT_01s0010g02460	VIT_00s0246g00150	VIT_09s0002g05560	VIT_14s0006g01090	VIT_18s0001g10830	VIT_18s0001g01030	VIT_00s0207g00140	VIT_06s0004g02390	VIT_18s0001g05730	VIT_17s0000g03850	VIT_14s0030g00670	VIT_00s0759g00010	VIT_07s0005g00150	VIT_16s0100g00720	VIT_06s0004g05870	VIT_17s0000g00280	VIT_04s0044g01880	VIT_13s0067g02560	VIT_18s0001g03910		VIT_05s0049g00210	VIT_18s0001g01680
VIT_08s0056g01300	VIT_18s0001g06250	VIT_14s0030g00520	VIT_10s0003g03090	VIT_18s0001g03600	VIT_00s0665g00030	VIT_06s0004g02060	VIT_06s0080g00400	VIT_03s0017g01280	VIT_07s0005g01800	VIT_07s0031g03220	VIT_00s0260g00070	VIT_18s0157g00140	VIT_08s0007g07410	VIT_08s0105g00570	VIT_03s0038g02010	VIT_11s0065g00350	VIT_06s0061g00790	VIT_13s0019g02380	VIT_13s0019g02820	VIT_08s0040g02590	VIT_12s0059g00270	VIT_05s0020g04680	VIT_00s0125g00060	VIT_02s0012g02340		VIT_12s0034g01350	VIT_12s0028g01650
VIT_00s0291g00090	VIT_07s0031g01600	VIT_13s0064g00830	VIT_17s0000g04030	VIT_18s0001g01740	VIT_16s0050g02240	VIT_04s0044g01120	VIT_18s0001g04760	VIT_18s0001g13610	VIT_08s0058g00930	VIT_18s0041g00430	VIT_00s0769g00010	VIT_05s0094g01230	VIT_07s0005g03980	VIT_11s0149g00040	VIT_07s0031g02700	VIT_08s0058g00990	VIT_18s0001g01020	VIT_06s0004g06390	VIT_09s0002g00640	VIT_07s0129g01080	VIT_07s0031g00680	VIT_14s0030g01980	VIT_08s0007g08520	VIT_11s0065g00040		VIT_18s0041g01330	VIT_07s0185g00130
VIT_05s0020g03070	VIT_08s0056g01530	VIT_19s0027g01690	VIT_13s0067g03170	VIT_04s0008g03250	VIT_01s0011g00610	VIT_06s0061g00040	VIT_16s0050g01160	VIT_08s0058g00470	VIT_07s0005g04600	VIT_18s0001g10680	VIT_13s0067g00270	VIT_13s0019g01190	VIT_06s0004g04790	VIT_18s0041g01280	VIT_03s0017g01000	VIT_06s0004g00030	VIT_01s0011g02150	VIT_12s0121g00230	VIT_17s0000g07190	VIT_05s0029g00400	VIT_19s0014g02730	VIT_06s0004g05120	VIT_05s0094g01590	VIT_11s0065g00630		VIT_01s0026g02190	VIT_06s0004g06840
VIT_05s0062g01270	VIT_12s0059g02420	VIT_00s1916g00010	VIT_08s0007g08550	VIT_12s0028g03080	VIT_04s0008g03100	VIT_04s0023g03650	VIT_14s0068g01950	VIT_15s0046g02220	VIT_11s0016g00900	VIT_03s0063g02640	VIT_09s0002g02640	VIT_08s0007g02100	VIT_01s0011g03440	VIT_05s0020g02880	VIT_06s0004g00790	VIT_01s0010g02020	VIT_08s0058g01450	VIT_17s0000g08010	VIT_18s0041g01230	VIT_14s0128g00460	VIT_06s0004g08360	VIT_10s0003g00580	VIT_10s0116g01810	VIT_09s0002g05980		VIT_07s0031g01980	VIT_16s0022g00540
VIT_15s0048g01670	VIT_07s0191g00050	VIT_12s0057g00710	VIT_03s0097g00530	VIT_01s0011g02120	VIT_18s0072g00150	VIT_04s0044g01110	VIT_19s0090g00420	VIT_11s0052g00240	VIT_16s0098g01180	VIT_06s0004g04000	VIT_10s0003g00010	VIT_17s0119g00120	VIT_04s0023g03240	VIT_14s0066g01080	VIT_03s0038g02860	VIT_11s0078g00290	VIT_06s0004g01500	VIT_08s0007g06000	VIT_13s0019g03000	VIT_09s0002g04480	VIT_18s0001g01660	VIT_07s0005g00820	VIT_11s0016g00580	VIT_01s0011g00350		VIT_08s0058g00470	VIT_03s0063g02250
VIT_11s0065g00630	VIT_06s0004g01180	VIT_11s0016g04420	VIT_06s0004g00710	VIT_18s0001g02570	VIT_01s0137g00650	VIT_07s0005g01040	VIT_08s0056g00180	VIT_14s0068g01960	VIT_08s0007g01040	VIT_18s0001g02720	VIT_06s0004g00360	VIT_14s0066g01670	VIT_00s0415g00050	VIT_01s0011g03370	VIT_19s0027g01870	VIT_18s0001g06850	VIT_15s0046g03340	VIT_00s2563g00010	VIT_00s0194g00030	VIT_18s0001g07550	VIT_07s0129g00310	VIT_09s0002g00890	VIT_15s0021g00890	VIT_16s0100g00600		VIT_05s0049g00460	VIT_00s0218g00100
VIT_01s0137g00550	VIT_06s0004g08150	VIT_10s0003g00090	VIT_06s0004g06010	VIT_01s0011g02980	VIT_18s0001g11970	VIT_14s0081g00030	VIT_19s0014g02660	VIT_00s0220g00110	VIT_14s0066g00410	VIT_04s0008g02250	VIT_09s0002g04330	VIT_13s0067g02640	VIT_19s0027g00290	VIT_02s0012g01030	VIT_03s0038g03900	VIT_18s0001g00340	VIT_08s0007g06450	VIT_06s0061g01120	VIT_04s0008g01570	VIT_19s0090g01600	VIT_07s0129g00290	VIT_04s0023g03600	VIT_03s0091g00230	VIT_06s0004g06210		VIT_04s0044g01880	VIT_07s0129g00620
VIT_01s0137g00520	VIT_13s0019g04460	VIT_09s0002g02420	VIT_00s1343g00010	VIT_19s0085g00820	VIT_06s0080g01050	VIT_05s0062g01320	VIT_19s0090g00120	VIT_08s0007g01750	VIT_17s0000g02260	VIT_13s0067g03890	VIT_06s0080g00400	VIT_08s0040g00320	VIT_04s0008g05330	VIT_00s0225g00130	VIT_19s0027g01890	VIT_08s0007g08410	VIT_08s0040g02280	VIT_18s0001g05180	VIT_00s0179g00150	VIT_16s0050g00670	VIT_07s0129g00300	VIT_10s0003g03790	VIT_11s0078g00260	VIT_15s0046g02380		VIT_03s0038g01110	VIT_18s0001g07320
VIT_17s0000g09610	VIT_08s0040g01710	VIT_09s0002g04280	VIT_03s0038g04500	VIT_03s0091g00310	VIT_18s0122g00770	VIT_05s0094g00350	VIT_19s0090g00080	VIT_18s0001g04980	VIT_12s0059g00590	VIT_04s0008g01210	VIT_13s0073g00120	VIT_14s0128g00520	VIT_05s0049g01230	VIT_03s0038g03440	VIT_18s0041g01270	VIT_08s0040g01710	VIT_00s0264g00090	VIT_17s0000g05030	VIT_01s0010g02290	VIT_18s0001g08700	VIT_02s0012g00980	VIT_05s0020g04420	VIT_19s0014g03480	VIT_08s0007g04120		VIT_00s0231g00070	VIT_11s0016g05330
VIT_06s0004g06480	VIT_00s0480g00040	VIT_03s0063g00080	VIT_01s0011g05670	VIT_19s0014g01440	VIT_09s0002g06780	VIT_05s0094g00340	VIT_19s0177g00040	VIT_14s0068g00640	VIT_18s0157g00090	VIT_18s0001g15460	VIT_12s0134g00060	VIT_18s0001g02770	VIT_15s0046g01010	VIT_06s0004g04460	VIT_07s0031g02340	VIT_18s0157g00140	VIT_11s0065g00050	VIT_18s0001g08150	VIT_13s0019g03170	VIT_09s0002g04280	VIT_01s0010g03620	VIT_07s0129g00180	VIT_10s0116g01820	VIT_07s0031g02700		VIT_09s0002g00650	VIT_07s0005g03970
VIT_01s0137g00540	VIT_17s0000g05060	VIT_11s0016g01370	VIT_00s0259g00200	VIT_15s0046g00240	VIT_00s0229g00170	VIT_18s0001g14910	VIT_15s0048g02880	VIT_11s0016g05210	VIT_09s0002g05740	VIT_00s0394g00030	VIT_00s0323g00080	VIT_06s0080g00170	VIT_09s0002g06660	VIT_04s0023g03420	VIT_19s0027g01880	VIT_15s0046g02300	VIT_19s0015g01010	VIT_12s0028g01670	VIT_02s0025g00280	VIT_17s0000g04870	VIT_12s0057g00630	VIT_11s0206g00070	VIT_05s0049g00140	VIT_11s0037g00070		VIT_03s0038g01090	VIT_07s0031g02550
VIT_13s0084g00070	VIT_13s0064g00740	VIT_02s0109g00230	VIT_00s0283g00030	VIT_01s0011g03530	VIT_06s0009g02800	VIT_05s0102g00710	VIT_18s0001g04790	VIT_04s0008g03050	VIT_19s0014g01410	VIT_19s0090g01490	VIT_08s0056g00180	VIT_04s0043g00220	VIT_14s0060g02090	VIT_04s0044g01110	VIT_04s0008g04530	VIT_08s0007g04670	VIT_00s0682g00010	VIT_15s0048g00340	VIT_00s0323g00080	VIT_00s0218g00050	VIT_07s0005g02220	VIT_07s0005g02100	VIT_08s0007g03370	VIT_14s0030g00650		VIT_03s0038g01130	VIT_06s0004g07440
VIT_02s0025g04860	VIT_07s0005g02230	VIT_15s0021g00040	VIT_02s0025g02140	VIT_06s0004g01510	VIT_07s0005g01800	VIT_08s0007g08310	VIT_04s0044g01530	VIT_19s0027g01790	VIT_00s0322g00030	VIT_11s0016g03130	VIT_12s0028g02140	VIT_18s0001g02020	VIT_06s0009g02550	VIT_05s0049g01400	VIT_14s0081g00200	VIT_14s0006g00350	VIT_00s0682g00020	VIT_17s0119g00120	VIT_08s0056g00180	VIT_05s0049g01350	VIT_12s0055g01110	VIT_10s0003g01960	VIT_04s0008g03630	VIT_14s0030g00670		VIT_08s0007g05390	VIT_16s0100g00360
VIT_18s0001g11500	VIT_14s0060g00480	VIT_08s0040g01730	VIT_19s0015g01090	VIT_00s0615g00030	VIT_12s0034g01760	VIT_00s0375g00030	VIT_13s0019g03430	VIT_01s0010g02580	VIT_17s0053g00990	VIT_03s0091g00450	VIT_04s0008g03190	VIT_19s0015g01310	VIT_11s0016g03940	VIT_02s0087g00630	VIT_11s0065g00740	VIT_01s0011g06600	VIT_06s0004g02950	VIT_19s0093g00150	VIT_18s0001g13260	VIT_08s0007g08800	VIT_08s0007g00840	VIT_03s0132g00340	VIT_13s0101g00230	VIT_10s0116g01670		VIT_07s0005g00820	VIT_06s0061g01250
VIT_18s0001g11580	VIT_12s0028g00590	VIT_11s0016g05410	VIT_08s0007g00130	VIT_16s0100g00460	VIT_17s0053g00770	VIT_11s0016g02200	VIT_12s0034g00130	VIT_12s0059g01080	VIT_04s0079g00420	VIT_18s0001g00810	VIT_03s0038g04590	VIT_19s0015g01290	VIT_00s0707g00010	VIT_18s0001g02440	VIT_07s0151g00020	VIT_17s0000g07670	VIT_06s0004g04790	VIT_11s0037g00890	VIT_17s0000g04020	VIT_16s0022g01820	VIT_04s0023g03510	VIT_08s0007g00200	VIT_17s0000g08080	VIT_06s0004g01550		VIT_14s0066g01790	VIT_18s0001g15130
VIT_18s0001g11560	VIT_05s0062g01430	VIT_01s0011g03820	VIT_13s0019g01430	VIT_14s0066g01450	VIT_18s0089g01220	VIT_02s0012g00550	VIT_01s0137g00510	VIT_14s0030g00740	VIT_13s0019g01650	VIT_14s0060g01450	VIT_06s0009g03670	VIT_19s0015g01300	VIT_05s0020g01480	VIT_17s0000g08070	VIT_14s0171g00210	VIT_04s0044g01160	VIT_13s0047g00510	VIT_04s0008g00800	VIT_14s0066g00590	VIT_19s0093g00590	VIT_19s0014g03850	VIT_01s0026g01640	VIT_00s0779g00010	VIT_08s0058g00990		VIT_04s0023g03600	VIT_00s0338g00030
VIT_18s0001g11570	VIT_13s0064g01720	VIT_04s0008g03660	VIT_16s0022g00510	VIT_11s0103g00570	VIT_04s0008g06320	VIT_12s0035g00880	VIT_10s0116g00410	VIT_13s0067g00930	VIT_06s0004g04860	VIT_18s0001g07380	VIT_18s0001g15010	VIT_04s0044g01160	VIT_13s0067g00270	VIT_06s0004g02060	VIT_06s0004g04550	VIT_00s0220g00110	VIT_09s0002g03490	VIT_00s0301g00090	VIT_19s0090g00080	VIT_15s0021g01390	VIT_18s0001g00760	VIT_13s0019g00750	VIT_17s0000g03790	VIT_07s0129g00360		VIT_14s0006g01400	VIT_08s0105g00190
VIT_16s0039g00910	VIT_18s0001g10580	VIT_02s0025g03450	VIT_06s0004g04470	VIT_12s0134g00480	VIT_17s0000g08080	VIT_06s0061g00560	VIT_18s0001g06690	VIT_01s0146g00100	VIT_08s0007g00440	VIT_01s0011g02930	VIT_19s0090g00080	VIT_05s0077g00030	VIT_05s0077g02290	VIT_04s0023g02810	VIT_00s0411g00020	VIT_01s0010g02460	VIT_06s0009g02520	VIT_05s0020g03190	VIT_19s0177g00040	VIT_11s0052g00630	VIT_07s0151g01000	VIT_14s0108g00630		VIT_02s0012g00540		VIT_12s0059g00370	VIT_02s0025g01710
VIT_16s0039g00920	VIT_19s0014g05130	VIT_05s0077g02010	VIT_06s0004g04510	VIT_13s0019g04010	VIT_07s0005g03390	VIT_07s0005g03570	VIT_15s0048g01490	VIT_08s0007g04890	VIT_01s0011g03450	VIT_14s0066g02270	VIT_19s0177g00040	VIT_18s0122g01440	VIT_05s0020g01140	VIT_18s0041g02430	VIT_00s0256g00030	VIT_02s0154g00350	VIT_01s0010g00690	VIT_02s0025g02410	VIT_02s0025g00830	VIT_04s0079g00760	VIT_07s0005g04920	VIT_10s0003g04540		VIT_01s0010g01090		VIT_11s0206g00070	VIT_19s0177g00120
VIT_18s0001g09990	VIT_05s0077g01250	VIT_06s0080g00330	VIT_09s0002g00640	VIT_04s0008g00180	VIT_12s0059g00220	VIT_08s0007g06040	VIT_12s0134g00040	VIT_19s0015g01740	VIT_02s0033g01410	VIT_01s0010g00020	VIT_15s0048g02880	VIT_04s0210g00110	VIT_01s0150g00310	VIT_12s0028g01100	VIT_12s0134g00590	VIT_01s0026g00980	VIT_02s0025g04190	VIT_07s0151g00640	VIT_00s0429g00040	VIT_17s0000g06860	VIT_05s0020g03180	VIT_01s0011g01140		VIT_13s0067g02360		VIT_16s0050g01310	VIT_00s0317g00030
VIT_18s0001g13780	VIT_17s0000g08960	VIT_14s0081g00630	VIT_17s0000g07190	VIT_13s0074g00720		VIT_01s0011g05500	VIT_03s0063g00380	VIT_05s0020g01980	VIT_16s0022g02170	VIT_12s0028g03230	VIT_02s0025g00830	VIT_08s0007g00200	VIT_14s0108g00850	VIT_16s0098g01180	VIT_16s0022g01970	VIT_16s0050g00240	VIT_12s0057g01320	VIT_18s0001g10910	VIT_00s1206g00010	VIT_04s0008g02770	VIT_04s0023g00410	VIT_19s0014g01710		VIT_18s0001g06850		VIT_16s0050g01300	VIT_19s0015g01440
VIT_13s0067g01960	VIT_14s0066g00810	VIT_05s0049g00090	VIT_11s0016g03940	VIT_18s0001g03910		VIT_06s0004g06390	VIT_03s0038g02680	VIT_09s0002g04170	VIT_14s0066g01270	VIT_18s0072g00460	VIT_19s0090g00120	VIT_04s0008g03530	VIT_13s0019g04300	VIT_05s0049g01130	VIT_00s0361g00040	VIT_08s0007g04590	VIT_14s0066g00920	VIT_06s0004g01510	VIT_00s1682g00020	VIT_01s0011g00670	VIT_04s0044g01410	VIT_17s0000g09470		VIT_18s0001g01140		VIT_12s0057g00520	VIT_02s0012g00660
VIT_08s0105g00260	VIT_03s0038g00150	VIT_06s0009g01380	VIT_00s0194g00030	VIT_02s0012g00860		VIT_12s0121g00230	VIT_00s0533g00020	VIT_05s0020g01810	VIT_08s0040g02900	VIT_04s0044g00280	VIT_19s0085g01030	VIT_08s0040g02750	VIT_06s0004g04020	VIT_08s0007g01040	VIT_00s0218g00140	VIT_05s0094g00320	VIT_17s0000g01850	VIT_18s0001g00290	VIT_01s0137g00510	VIT_02s0012g01410	VIT_10s0003g04350	VIT_10s0003g02030		VIT_18s0001g00340		VIT_02s0025g04350	VIT_06s0080g00570
VIT_07s0005g01460	VIT_14s0060g00790	VIT_06s0004g00490	VIT_13s0019g03170	VIT_12s0035g01070		VIT_17s0000g08010	VIT_16s0098g01640	VIT_11s0118g00440	VIT_15s0024g00980	VIT_00s0203g00190	VIT_09s0002g01040	VIT_13s0047g01220	VIT_07s0005g03540	VIT_05s0077g01310	VIT_15s0046g01970	VIT_07s0005g02560	VIT_13s0067g03170	VIT_06s0009g01930	VIT_06s0004g05050	VIT_08s0058g01110	VIT_08s0058g01450	VIT_03s0063g02610		VIT_08s0007g08410		VIT_16s0050g00850	VIT_14s0066g02610
VIT_07s0095g00550	VIT_04s0023g02690	VIT_09s0018g01920	VIT_18s0001g01030	VIT_07s0104g00650		VIT_08s0007g06000	VIT_19s0014g03650	VIT_13s0067g03360	VIT_11s0016g02180	VIT_08s0105g00570	VIT_14s0060g00360	VIT_12s0034g00030	VIT_04s0023g01940	VIT_08s0007g07480	VIT_12s0134g00670	VIT_16s0050g02220	VIT_01s0011g02180	VIT_03s0063g02640	VIT_03s0063g01180	VIT_17s0000g00010	VIT_01s0026g02680	VIT_08s0007g04180		VIT_00s0480g00030		VIT_07s0129g00920	VIT_05s0049g00140
VIT_16s0039g00520	VIT_07s0005g04130	VIT_17s0000g00120	VIT_14s0083g00170	VIT_07s0005g02080		VIT_07s0129g00230	VIT_03s0063g01770	VIT_13s0019g03330	VIT_13s0019g00740	VIT_06s0004g05740	VIT_04s0023g03370	VIT_12s0055g00290	VIT_01s0026g01770	VIT_14s0066g00410	VIT_13s0019g03430	VIT_05s0094g00360	VIT_03s0097g00530	VIT_04s0008g02250	VIT_16s0022g02310	VIT_14s0066g02090	VIT_07s0141g00570	VIT_15s0046g03500		VIT_18s0157g00190		VIT_12s0142g00130	VIT_05s0020g04500
VIT_13s0156g00340	VIT_04s0043g00310	VIT_08s0040g00230	VIT_08s0032g00760	VIT_01s0011g05240		VIT_11s0016g00470	VIT_08s0056g01240	VIT_08s0007g08130	VIT_13s0019g05110	VIT_03s0017g01690	VIT_02s0025g02960	VIT_03s0017g02110	VIT_15s0048g01120	VIT_08s0007g08310	VIT_11s0037g00570	VIT_05s0094g00220	VIT_06s0061g00270	VIT_18s0001g02720	VIT_18s0001g06690	VIT_14s0066g02040	VIT_01s0011g02150	VIT_09s0002g00570		VIT_15s0045g00370		VIT_08s0007g00200	VIT_14s0108g01000
VIT_18s0001g00860	VIT_05s0062g01000	VIT_00s0391g00040	VIT_04s0008g03190	VIT_16s0098g01210		VIT_07s0005g00750	VIT_00s0246g00160	VIT_08s0007g07370	VIT_18s0041g01270	VIT_03s0038g03630	VIT_17s0000g07200	VIT_12s0034g00130	VIT_13s0019g02640	VIT_18s0001g11630	VIT_18s0001g12990	VIT_14s0108g00540	VIT_07s0129g00400	VIT_11s0016g04700	VIT_09s0054g01520	VIT_12s0035g00380	VIT_00s0904g00010	VIT_18s0001g06150		VIT_04s0008g05380		VIT_19s0014g05330	VIT_13s0067g02560
VIT_04s0023g03470	VIT_04s0008g00180	VIT_08s0058g00700	VIT_18s0001g15010	VIT_10s0116g00690		VIT_00s2563g00010	VIT_05s0102g00600	VIT_11s0065g00450	VIT_03s0038g02290	VIT_16s0100g00510	VIT_17s0000g04150	VIT_03s0017g02000	VIT_17s0000g04150	VIT_05s0094g01160	VIT_00s0207g00010	VIT_16s0100g00290	VIT_01s0011g04320	VIT_04s0008g01210	VIT_03s0063g00380	VIT_14s0066g02060	VIT_00s0207g00210	VIT_14s0108g00090		VIT_17s0000g08460		VIT_05s0020g00440	VIT_02s0025g00330
VIT_01s0011g00560	VIT_06s0061g00560	VIT_14s0068g00090	VIT_10s0523g00030	VIT_18s0001g01530		VIT_10s0116g01640	VIT_08s0058g01260	VIT_06s0004g01910	VIT_07s0031g02440	VIT_09s0002g08660	VIT_14s0068g00920	VIT_13s0019g03430	VIT_16s0039g02350	VIT_11s0016g05230	VIT_10s0003g00900	VIT_14s0066g00810	VIT_06s0004g03730	VIT_13s0067g01120	VIT_07s0031g00620	VIT_11s0016g01650	VIT_18s0001g02700	VIT_18s0001g08810		VIT_06s0004g02680		VIT_19s0014g01710	VIT_05s0094g01590
VIT_18s0001g07810	VIT_01s0150g00180	VIT_10s0003g04990	VIT_19s0090g00080	VIT_08s0007g08220		VIT_14s0060g00440	VIT_16s0098g01000	VIT_11s0016g00530	VIT_01s0026g02500	VIT_18s0001g06220	VIT_14s0068g00930	VIT_08s0007g01810	VIT_08s0007g05130	VIT_05s0094g01130	VIT_07s0031g00300	VIT_14s0066g02350	VIT_13s0084g00600	VIT_08s0007g01510	VIT_15s0046g00490	VIT_04s0044g01670	VIT_13s0019g05260	VIT_12s0028g03560		VIT_07s0005g00410		VIT_18s0076g00250	VIT_08s0007g08520
VIT_19s0015g00680	VIT_14s0066g01270	VIT_08s0058g00440	VIT_17s0000g01250	VIT_05s0049g00770		VIT_04s0008g03590	VIT_17s0000g09800	VIT_01s0011g03370	VIT_17s0000g01000	VIT_12s0057g00720	VIT_02s0025g02970	VIT_07s0005g00820	VIT_12s0059g01790	VIT_01s0011g00730	VIT_07s0005g04770	VIT_05s0029g00680	VIT_16s0022g01860	VIT_01s0010g00950	VIT_00s0194g00190	VIT_11s0016g01530	VIT_03s0063g01850	VIT_03s0038g00660		VIT_01s0026g00220		VIT_00s0181g00010	VIT_17s0000g08380
VIT_05s0049g00420	VIT_03s0063g02490	VIT_00s0404g00050	VIT_19s0090g00120	VIT_14s0066g00500		VIT_06s0004g02410	VIT_11s0016g04670	VIT_11s0052g00620	VIT_18s0001g06880	VIT_00s0265g00070	VIT_18s0001g03470	VIT_13s0019g03550	VIT_17s0000g00950	VIT_17s0000g05030	VIT_08s0056g01530	VIT_11s0016g02800	VIT_18s0001g10170	VIT_19s0090g01490	VIT_04s0008g02680	VIT_14s0030g00570	VIT_07s0005g05610	VIT_09s0018g01540		VIT_18s0001g06360		VIT_17s0000g00400	VIT_03s0063g01910
VIT_11s0016g01370	VIT_14s0006g00520	VIT_03s0038g03190	VIT_03s0091g01290	VIT_02s0025g03150		VIT_03s0038g01350	VIT_12s0028g03790	VIT_01s0137g00220	VIT_02s0025g03280	VIT_18s0001g07340	VIT_04s0044g01530	VIT_06s0009g01810	VIT_16s0022g02310	VIT_03s0063g00450	VIT_08s0007g06170	VIT_08s0007g05240	VIT_01s0011g02040	VIT_13s0158g00340	VIT_14s0066g01330	VIT_16s0022g00240	VIT_15s0046g01680	VIT_00s0561g00020		VIT_01s0010g02460		VIT_15s0046g00470	VIT_18s0001g09130
VIT_08s0040g01730	VIT_16s0022g00660	VIT_18s0001g11430	VIT_13s0019g02550	VIT_02s0025g03160		VIT_03s0063g01960	VIT_17s0000g06300	VIT_16s0039g00320	VIT_04s0023g01300	VIT_14s0006g00180	VIT_17s0000g07210	VIT_09s0002g04020	VIT_09s0054g01470	VIT_18s0001g00560	VIT_14s0066g00970	VIT_02s0012g00550	VIT_02s0025g01160	VIT_07s0005g01760	VIT_05s0102g00600	VIT_05s0020g03030	VIT_04s0008g01210	VIT_09s0002g05080		VIT_18s0001g02440		VIT_08s0007g08940	VIT_05s0020g02270
VIT_11s0016g05410	VIT_07s0005g01300	VIT_17s0000g06640	VIT_11s0016g03250	VIT_11s0103g00530		VIT_12s0034g01140	VIT_04s0008g06150	VIT_04s0044g01120	VIT_04s0044g01150	VIT_19s0085g01110	VIT_05s0136g00260	VIT_15s0021g02060	VIT_05s0051g00670	VIT_01s0026g01660	VIT_02s0087g00470	VIT_15s0048g00320	VIT_12s0142g00670	VIT_11s0103g00190	VIT_17s0000g09800	VIT_14s0066g00760	VIT_01s0011g01320	VIT_03s0088g00620		VIT_14s0108g00190		VIT_00s0370g00020	VIT_07s0005g02450
VIT_04s0008g05470	VIT_12s0059g01320	VIT_09s0002g02980	VIT_14s0060g00360	VIT_18s0001g03790		VIT_11s0016g05530	VIT_00s0189g00050	VIT_04s0044g01110	VIT_10s0003g02670	VIT_02s0154g00520	VIT_12s0134g00650	VIT_00s0404g00040	VIT_19s0093g00550	VIT_06s0004g00070	VIT_08s0007g01810	VIT_19s0135g00060	VIT_14s0060g00060	VIT_11s0016g03130	VIT_11s0016g04670	VIT_09s0054g00300	VIT_00s1546g00010	VIT_07s0129g00930		VIT_14s0060g00420		VIT_03s0063g02610	VIT_03s0091g00230
VIT_05s0020g04110	VIT_19s0014g00090	VIT_03s0038g00370	VIT_17s0000g07200	VIT_04s0008g05050		VIT_15s0048g01420	VIT_18s0001g14640	VIT_00s0187g00260	VIT_07s0031g02990	VIT_06s0080g01160	VIT_02s0025g04720	VIT_19s0014g04060	VIT_08s0007g00600	VIT_13s0067g02640	VIT_07s0151g00440	VIT_14s0066g00340	VIT_15s0046g01010	VIT_18s0001g00810	VIT_16s0098g01210	VIT_10s0071g00860	VIT_00s0264g00100	VIT_19s0014g01150		VIT_18s0001g06060		VIT_03s0038g03860	VIT_04s0008g05510
VIT_06s0004g00090	VIT_08s0040g02340	VIT_08s0007g07550	VIT_18s0001g14310	VIT_18s0076g00100		VIT_09s0018g00520	VIT_14s0060g01730	VIT_07s0005g03780	VIT_15s0107g00500	VIT_08s0007g02450	VIT_12s0134g00670	VIT_19s0014g04190	VIT_13s0019g02160	VIT_06s0004g06020	VIT_09s0002g03940	VIT_01s0011g04680	VIT_16s0022g02110	VIT_11s0052g01780	VIT_05s0020g00960	VIT_01s0010g03210	VIT_08s0007g07090	VIT_11s0016g04920		VIT_08s0007g08840		VIT_09s0002g00570	VIT_01s0011g04550
VIT_06s0080g00310	VIT_19s0090g01070	VIT_04s0023g01360	VIT_05s0136g00260	VIT_00s0769g00010		VIT_07s0031g03220	VIT_13s0019g01440	VIT_07s0031g02630	VIT_14s0060g00290	VIT_16s0050g01870	VIT_18s0001g12800	VIT_00s0353g00060	VIT_11s0016g03570	VIT_05s0062g00900	VIT_11s0016g03350	VIT_01s0011g05500	VIT_17s0000g03030	VIT_11s0037g01210	VIT_10s0003g04820	VIT_11s0052g00390	VIT_16s0039g01410	VIT_11s0016g02920		VIT_14s0081g00030		VIT_15s0046g03180	VIT_01s0137g00780
VIT_16s0013g01110	VIT_00s0220g00070	VIT_06s0009g01940	VIT_00s0361g00040	VIT_09s0002g06030		VIT_10s0092g00150	VIT_06s0080g01090	VIT_01s0026g00220	VIT_04s0023g01940	VIT_09s0002g09280	VIT_12s0034g00130	VIT_19s0014g04160	VIT_18s0166g00160	VIT_05s0062g00890	VIT_11s0052g00840	VIT_15s0046g01190	VIT_18s0001g02530	VIT_12s0028g00670	VIT_09s0002g00630	VIT_16s0050g01530	VIT_17s0000g00140	VIT_12s0057g00190		VIT_16s0100g00290		VIT_14s0083g01140	VIT_18s0001g03860
VIT_10s0003g00590	VIT_06s0004g04390	VIT_18s0157g00020	VIT_18s0001g12800	VIT_18s0001g06850		VIT_18s0001g10830	VIT_14s0060g01010	VIT_05s0062g01000	VIT_13s0106g00230	VIT_11s0016g03010	VIT_11s0052g01630	VIT_08s0058g01100	VIT_12s0059g02660	VIT_01s0127g00060	VIT_18s0001g08610	VIT_07s0005g01300	VIT_18s0001g08680	VIT_01s0011g02930	VIT_15s0046g01300	VIT_11s0118g00160	VIT_13s0019g00720	VIT_01s0011g03050		VIT_00s0199g00220		VIT_18s0001g05840	VIT_17s0000g08080
VIT_03s0063g00460	VIT_05s0029g00190	VIT_17s0000g07260	VIT_00s0218g00220	VIT_01s0011g03140		VIT_18s0001g10680	VIT_15s0046g01440	VIT_14s0030g02020	VIT_10s0003g04500	VIT_13s0084g00820	VIT_11s0052g01600	VIT_03s0038g03660	VIT_11s0016g04140	VIT_13s0064g00370	VIT_07s0031g00220	VIT_13s0019g00840	VIT_19s0015g00920	VIT_13s0064g01260	VIT_05s0077g01920	VIT_04s0008g00320	VIT_01s0026g01710	VIT_16s0100g00740		VIT_14s0066g00810		VIT_02s0025g01070	VIT_01s0146g00100
VIT_01s0150g00120	VIT_09s0002g04490	VIT_10s0116g01640	VIT_11s0052g01630	VIT_09s0002g02450		VIT_06s0004g01510	VIT_08s0007g03640	VIT_05s0062g01010	VIT_06s0004g03980	VIT_13s0158g00080	VIT_08s0040g00780	VIT_03s0063g00610	VIT_02s0025g01080	VIT_00s0399g00060	VIT_08s0007g04780	VIT_12s0055g00200	VIT_03s0038g04610	VIT_01s0010g00020	VIT_19s0014g03310	VIT_18s0075g00660	VIT_05s0049g01660	VIT_08s0056g01300		VIT_17s0000g01290		VIT_12s0028g03800	VIT_06s0009g00370
VIT_17s0000g00200	VIT_11s0037g00890	VIT_12s0057g00700	VIT_01s0137g00520	VIT_18s0001g06140		VIT_05s0020g03170	VIT_04s0008g05210	VIT_05s0062g00980	VIT_14s0171g00210	VIT_10s0042g01050	VIT_06s0004g05050	VIT_05s0077g01480	VIT_17s0000g03780	VIT_02s0033g01380	VIT_06s0061g00730	VIT_00s0233g00030	VIT_10s0003g02660	VIT_17s0000g09120	VIT_12s0028g03790	VIT_03s0038g04430	VIT_06s0080g01270	VIT_18s0001g12520		VIT_16s0022g00670		VIT_06s0004g08440	VIT_00s0779g00010
VIT_00s1455g00010	VIT_13s0067g03810	VIT_09s0070g00310	VIT_11s0052g01090	VIT_18s0001g06180		VIT_11s0016g01230	VIT_18s0001g09230	VIT_05s0077g01300	VIT_07s0005g03950	VIT_08s0040g01140	VIT_16s0039g00570	VIT_04s0008g03770	VIT_17s0000g02850	VIT_06s0080g00170	VIT_08s0040g01890	VIT_02s0154g00110	VIT_08s0056g01420	VIT_17s0000g09130	VIT_05s0102g00620	VIT_01s0011g00490	VIT_06s0004g02950	VIT_18s0001g14410		VIT_05s0077g00840		VIT_18s0089g00340	VIT_08s0040g02380
VIT_03s0038g04590	VIT_04s0008g05000	VIT_07s0129g00230	VIT_01s0137g00510	VIT_00s2579g00010		VIT_12s0059g01060	VIT_06s0004g06710	VIT_15s0046g01430	VIT_07s0130g00470	VIT_15s0048g01170	VIT_00s0271g00030	VIT_14s0068g01190	VIT_14s0083g00250	VIT_01s0011g03290	VIT_13s0019g04280	VIT_12s0057g00700	VIT_18s0117g00220	VIT_11s0016g05090	VIT_19s0015g00270	VIT_02s0033g00770	VIT_06s0009g01570			VIT_11s0016g02800		VIT_14s0068g00510
VIT_06s0009g03670	VIT_06s0004g05020	VIT_08s0007g06000	VIT_02s0012g01570	VIT_09s0002g08330		VIT_18s0001g11630	VIT_11s0103g00760	VIT_01s0010g01730	VIT_03s0038g04270	VIT_14s0066g00400	VIT_16s0050g01090	VIT_18s0001g04860	VIT_18s0001g00360	VIT_05s0094g01210	VIT_13s0019g00330	VIT_17s0119g00280	VIT_16s0022g02010	VIT_11s0118g00250	VIT_10s0042g01150	VIT_13s0019g04030	VIT_06s0004g04730			VIT_13s0067g00890		VIT_00s0587g00030
VIT_04s0023g03510	VIT_18s0001g06580	VIT_04s0069g00730	VIT_16s0098g00850	VIT_13s0067g03700		VIT_01s0011g03090	VIT_18s0041g01220	VIT_18s0157g00140	VIT_01s0011g05700	VIT_11s0118g00360	VIT_05s0049g00740	VIT_14s0060g00350	VIT_00s0125g00200	VIT_00s1937g00010	VIT_04s0008g03550	VIT_17s0119g00150	VIT_01s0010g00680	VIT_06s0004g05740	VIT_09s0070g00060	VIT_02s0033g00670	VIT_08s0040g00710			VIT_11s0118g00420		VIT_04s0023g03590
VIT_03s0063g01690	VIT_08s0007g03430	VIT_00s0415g00040	VIT_08s0040g00780	VIT_12s0034g01140		VIT_17s0000g02700	VIT_06s0004g04950	VIT_05s0094g01230	VIT_05s0029g01540	VIT_05s0062g00300	VIT_16s0098g01640	VIT_18s0001g02420	VIT_18s0001g08970	VIT_12s0055g00480	VIT_13s0067g00220	VIT_12s0028g02160	VIT_01s0010g02290	VIT_08s0007g01450	VIT_12s0035g00620	VIT_02s0033g00870	VIT_06s0004g02910			VIT_11s0016g05010		VIT_03s0088g00620
VIT_10s0003g02910	VIT_07s0151g01130	VIT_02s0025g00560	VIT_16s0039g02040	VIT_05s0102g00480		VIT_06s0009g01930	VIT_04s0023g01660	VIT_05s0094g01140	VIT_13s0067g03880	VIT_05s0062g00270	VIT_13s0067g02630	VIT_19s0090g01350	VIT_14s0060g01040	VIT_13s0019g05110	VIT_15s0046g02420	VIT_10s0003g05690	VIT_04s0008g01590	VIT_08s0007g08260	VIT_05s0020g01090	VIT_02s0033g00700	VIT_06s0004g04790			VIT_05s0062g00960		VIT_04s0008g04210
VIT_08s0007g01570	VIT_07s0005g02370	VIT_17s0000g00160	VIT_07s0031g00350	VIT_09s0070g00490		VIT_06s0004g04000	VIT_10s0003g04040	VIT_00s0220g00130	VIT_13s0067g01670	VIT_18s0001g02610	VIT_04s0008g02680	VIT_14s0006g00180	VIT_04s0023g01010	VIT_02s0033g01320	VIT_15s0046g02410	VIT_08s0040g00920	VIT_05s0020g03330	VIT_12s0059g01380	VIT_04s0008g05210	VIT_15s0021g02470	VIT_07s0031g00010			VIT_18s0122g01400		VIT_14s0108g00840
VIT_12s0028g01600	VIT_14s0083g00110	VIT_00s0494g00010	VIT_06s0004g05050	VIT_08s0217g00100		VIT_18s0001g02720	VIT_17s0000g02660	VIT_13s0067g01320	VIT_01s0011g06300	VIT_17s0000g07790	VIT_01s0011g03460	VIT_19s0085g01110	VIT_05s0077g00780	VIT_05s0062g01150	VIT_00s0299g00100	VIT_00s0153g00050	VIT_05s0020g04090	VIT_03s0091g01080	VIT_07s0129g00670	VIT_04s0008g05390	VIT_13s0064g01270			VIT_17s0000g03230		VIT_00s0203g00180
VIT_11s0037g01280	VIT_14s0108g01660	VIT_03s0063g02610	VIT_04s0044g02010	VIT_05s0062g00970		VIT_04s0008g02250	VIT_17s0000g07510	VIT_18s0075g00120	VIT_00s0131g00010	VIT_12s0028g03200	VIT_03s0097g00560	VIT_02s0154g00520	VIT_01s0011g03430	VIT_13s0074g00550	VIT_00s0527g00030	VIT_19s0093g00350	VIT_06s0004g04470	VIT_01s0127g00540	VIT_09s0002g02300	VIT_03s0063g00700	VIT_04s0044g01700			VIT_14s0066g00240		VIT_11s0016g04920
VIT_02s0025g04880	VIT_07s0141g00060	VIT_06s0004g04080	VIT_11s0016g03200	VIT_18s0001g06460		VIT_18s0001g15460	VIT_01s0026g01050	VIT_17s0000g05030	VIT_00s0357g00130	VIT_08s0007g00580	VIT_19s0014g02180	VIT_00s0510g00050	VIT_06s0061g01290	VIT_10s0116g01540	VIT_15s0046g01210	VIT_00s0153g00070	VIT_06s0004g05770	VIT_01s0127g00560	VIT_11s0016g02790	VIT_16s0022g02440	VIT_09s0002g01420			VIT_06s0061g00120		VIT_11s0016g02920
VIT_07s0104g00930	VIT_18s0001g00770	VIT_16s0098g01060	VIT_19s0140g00120	VIT_13s0139g00030		VIT_00s0313g00040	VIT_06s0080g00780	VIT_08s0007g02100	VIT_06s0004g06410	VIT_02s0087g00380	VIT_05s0102g00600	VIT_12s0028g00610	VIT_12s0035g00050	VIT_02s0025g03270	VIT_12s0059g01430	VIT_08s0056g00630	VIT_09s0002g06790	VIT_03s0038g01930	VIT_02s0012g01940	VIT_13s0084g00130	VIT_17s0053g01010			VIT_17s0000g08010		VIT_06s0004g04350
VIT_13s0019g03060	VIT_16s0050g02460	VIT_18s0001g12930	VIT_19s0140g00140	VIT_16s0098g00210		VIT_14s0006g01030	VIT_16s0098g00760	VIT_14s0068g00420	VIT_11s0016g01850	VIT_18s0001g03890	VIT_17s0000g09800	VIT_17s0000g09150	VIT_14s0068g00150	VIT_02s0025g03280	VIT_03s0038g00830	VIT_14s0060g00550	VIT_11s0016g03940	VIT_18s0001g11290	VIT_18s0041g01220	VIT_08s0040g00810	VIT_00s0415g00050			VIT_19s0090g01070		VIT_14s0171g00320
VIT_08s0007g05260	VIT_04s0044g01740	VIT_03s0038g02440	VIT_01s0137g00550	VIT_16s0050g02330		VIT_19s0090g01490	VIT_14s0068g01690	VIT_01s0026g01660	VIT_15s0046g01950	VIT_08s0007g07310	VIT_05s0077g01460	VIT_05s0077g00950	VIT_06s0004g04210	VIT_07s0031g02950	VIT_07s0104g00020	VIT_11s0037g01120	VIT_11s0037g00510	VIT_18s0001g04150	VIT_13s0019g04540	VIT_17s0000g08450	VIT_16s0100g00530			VIT_18s0122g00980		VIT_00s0386g00040
VIT_19s0093g00320	VIT_06s0004g02950	VIT_06s0061g00040	VIT_03s0063g01590	VIT_09s0002g01150		VIT_15s0046g02400	VIT_02s0025g01280	VIT_17s0119g00120	VIT_01s0010g02340	VIT_09s0054g00990	VIT_01s0011g01350	VIT_12s0028g01190	VIT_17s0000g07880	VIT_08s0058g00150	VIT_03s0063g01020	VIT_14s0060g01170	VIT_13s0019g02780	VIT_17s0000g02150	VIT_15s0048g00270	VIT_02s0033g00800	VIT_18s0001g10210			VIT_12s0059g01320		VIT_08s0056g01300
VIT_19s0027g00460	VIT_17s0000g00710	VIT_11s0149g00050	VIT_00s0271g00060	VIT_05s0029g01080		VIT_00s0583g00030	VIT_15s0046g01140	VIT_17s0119g00150	VIT_02s0087g00370	VIT_19s0090g01090	VIT_11s0016g00210	VIT_14s0060g00550	VIT_19s0014g02240	VIT_12s0035g01190	VIT_17s0000g09090	VIT_00s0386g00020	VIT_13s0019g02850	VIT_00s0246g00150	VIT_00s0732g00010	VIT_02s0109g00430	VIT_06s0004g04340			VIT_02s0012g00170		VIT_13s0019g03610
VIT_01s0026g01340	VIT_06s0004g04170	VIT_05s0049g02220	VIT_12s0134g00040	VIT_07s0191g00200		VIT_11s0016g03130	VIT_01s0010g03630	VIT_00s0270g00120	VIT_07s0031g00280	VIT_01s0026g00290	VIT_17s0000g06300	VIT_19s0014g00020	VIT_13s0067g02380	VIT_12s0035g01200	VIT_04s0008g05830	VIT_13s0084g00610	VIT_13s0019g02930	VIT_06s0004g01130	VIT_00s0299g00100	VIT_06s0004g02590	VIT_08s0007g07450			VIT_03s0038g00360		VIT_01s0146g00370
VIT_07s0005g00260	VIT_17s0000g00720	VIT_01s0026g01950	VIT_11s0016g00760	VIT_12s0035g00860		VIT_18s0122g00610	VIT_12s0059g02510	VIT_14s0066g01670	VIT_14s0066g00970	VIT_15s0048g00740	VIT_03s0017g01450	VIT_14s0060g02000	VIT_00s0125g00290	VIT_05s0049g01180	VIT_10s0003g01130	VIT_05s0062g00210	VIT_13s0019g03000	VIT_14s0006g00180	VIT_15s0021g01880	VIT_00s0252g00110	VIT_19s0015g00980			VIT_19s0093g00320		VIT_14s0030g02170
VIT_02s0012g01120	VIT_01s0010g00610	VIT_02s0025g04630	VIT_00s0533g00020	VIT_13s0158g00210		VIT_18s0001g00810	VIT_12s0134g00400	VIT_10s0092g00240	VIT_06s0004g05970	VIT_18s0001g08590	VIT_00s0189g00050	VIT_14s0060g02020	VIT_18s0001g09250	VIT_01s0026g02340	VIT_03s0038g02120	VIT_00s0274g00090	VIT_14s0060g02340	VIT_19s0085g01110	VIT_03s0038g02310	VIT_14s0083g01200	VIT_16s0100g00450			VIT_06s0004g05700		VIT_18s0001g14410
VIT_00s0415g00040	VIT_01s0011g03440	VIT_07s0129g00490	VIT_07s0104g01250	VIT_05s0020g00670		VIT_03s0038g04100	VIT_09s0054g00530	VIT_14s0128g00520	VIT_09s0002g03940	VIT_13s0019g03530	VIT_19s0085g00360	VIT_14s0060g01990	VIT_13s0067g01450	VIT_05s0094g01080	VIT_14s0066g01870	VIT_01s0150g00570	VIT_16s0022g00510	VIT_06s0080g01160	VIT_17s0000g06190	VIT_03s0063g01210	VIT_09s0002g01760			VIT_08s0007g01420		VIT_07s0129g00930
VIT_07s0005g00410	VIT_04s0023g03240	VIT_11s0016g04260	VIT_16s0098g01640	VIT_06s0004g04980		VIT_01s0011g02930	VIT_05s0102g00750	VIT_10s0003g03280	VIT_11s0052g00840	VIT_18s0001g14140	VIT_14s0060g01730	VIT_18s0001g12100	VIT_19s0027g01120	VIT_01s0010g01380	VIT_18s0001g14180	VIT_07s0151g00490	VIT_16s0098g01060	VIT_18s0001g02420	VIT_08s0056g00800	VIT_03s0063g01160	VIT_17s0000g09120			VIT_01s0026g02400
VIT_19s0014g02880	VIT_05s0051g00340	VIT_11s0016g04270	VIT_17s0000g09800	VIT_13s0019g04810		VIT_14s0066g02270	VIT_08s0058g01270	VIT_02s0033g01400	VIT_18s0001g08610	VIT_18s0001g08160	VIT_08s0007g08030	VIT_04s0044g01860	VIT_14s0066g00680	VIT_08s0040g02750	VIT_17s0000g08080	VIT_17s0000g03730	VIT_17s0000g07190	VIT_13s0084g00820	VIT_04s0008g01810	VIT_06s0061g00590	VIT_12s0035g00970			VIT_08s0040g00920
VIT_16s0098g01080	VIT_16s0050g02340	VIT_12s0059g01710	VIT_05s0049g00720	VIT_01s0011g05250		VIT_18s0072g00460	VIT_05s0077g01970	VIT_02s0033g01380	VIT_08s0007g08580	VIT_01s0010g00980	VIT_02s0012g01350	VIT_04s0044g01850	VIT_19s0014g04670	VIT_08s0007g00200	VIT_18s0001g02540	VIT_07s0151g00260	VIT_18s0089g01270	VIT_03s0017g00540	VIT_16s0022g01210	VIT_10s0116g01650	VIT_16s0039g00370			VIT_07s0104g01800
VIT_03s0063g02610	VIT_13s0019g04470	VIT_07s0104g01350	VIT_19s0085g00360	VIT_19s0015g00130		VIT_08s0105g00570	VIT_08s0040g02950	VIT_06s0080g00170	VIT_14s0108g01500	VIT_08s0007g02040	VIT_06s0009g03390	VIT_04s0044g01880	VIT_13s0067g01350	VIT_09s0002g03920	VIT_07s0031g00980	VIT_09s0002g00810	VIT_01s0127g00590	VIT_13s0067g01980	VIT_14s0060g00240	VIT_15s0024g00070	VIT_06s0004g00200			VIT_00s0153g00050
VIT_04s0044g00510	VIT_17s0000g01730	VIT_01s0026g02270	VIT_02s0025g02100	VIT_17s0053g00140		VIT_06s0004g05740	VIT_04s0008g04150	VIT_01s0011g03290	VIT_01s0026g02490	VIT_12s0057g00210	VIT_07s0005g02070	VIT_13s0064g01510	VIT_04s0008g05210	VIT_14s0171g00410	VIT_04s0008g04250	VIT_01s0011g01160	VIT_18s0001g01030	VIT_06s0009g02840	VIT_16s0050g01180	VIT_03s0063g01310	VIT_15s0048g01870			VIT_19s0093g00110
VIT_11s0016g04250	VIT_08s0058g00170	VIT_16s0013g01940	VIT_00s2839g00010	VIT_18s0001g14500		VIT_02s0012g00400	VIT_12s0028g03010	VIT_03s0017g01000	VIT_06s0004g02850	VIT_07s0141g01050	VIT_00s2839g00010	VIT_11s0016g01190	VIT_01s0026g02580	VIT_13s0067g03880	VIT_18s0001g04790	VIT_05s0020g03190	VIT_07s0005g02410	VIT_06s0009g02970	VIT_17s0000g06810	VIT_16s0039g00820	VIT_00s0818g00010			VIT_19s0015g02730
VIT_05s0077g01010	VIT_03s0088g01250	VIT_15s0046g00220	VIT_07s0031g02210	VIT_00s0215g00110		VIT_12s0059g01380	VIT_13s0084g00310	VIT_18s0001g13650	VIT_03s0038g02520	VIT_01s0011g05240	VIT_05s0051g00700	VIT_14s0030g01980	VIT_17s0000g04850	VIT_06s0009g03640	VIT_05s0020g00950	VIT_02s0025g04730	VIT_17s0000g02530	VIT_05s0062g00310	VIT_10s0116g00500	VIT_16s0050g00480	VIT_09s0054g01600			VIT_07s0104g01830
VIT_01s0011g04700	VIT_14s0060g01290	VIT_12s0035g00880	VIT_09s0002g00630	VIT_16s0100g01190		VIT_03s0091g01080	VIT_18s0001g01630	VIT_04s0043g00220	VIT_02s0025g03390	VIT_02s0025g01320	VIT_08s0058g01260	VIT_12s0057g00420	VIT_01s0011g06200	VIT_04s0023g01240	VIT_14s0060g00330	VIT_11s0037g00290	VIT_07s0005g02610	VIT_00s0615g00020	VIT_15s0046g02260	VIT_12s0035g00610	VIT_05s0049g01840			VIT_08s0007g03510
VIT_14s0068g00670	VIT_00s0283g00030	VIT_18s0086g00200	VIT_15s0046g01300	VIT_18s0076g00250		VIT_14s0060g02090	VIT_16s0050g02620	VIT_02s0033g01310	VIT_14s0030g00410	VIT_08s0007g05270	VIT_16s0098g01000	VIT_02s0154g00010	VIT_18s0001g09590	VIT_06s0004g06410	VIT_01s0011g03210	VIT_00s0246g00200	VIT_08s0007g03160	VIT_13s0019g04390	VIT_02s0025g02330	VIT_02s0012g02340	VIT_06s0004g06010			VIT_03s0063g01970
VIT_16s0098g01170	VIT_14s0060g02090	VIT_11s0118g00480	VIT_01s0011g03430	VIT_11s0065g00130		VIT_07s0031g00670	VIT_08s0058g01040	VIT_06s0004g00800	VIT_09s0002g03520	VIT_05s0102g00190	VIT_14s0068g01340	VIT_11s0016g00520	VIT_03s0091g00260	VIT_15s0046g03030	VIT_04s0008g03010	VIT_14s0128g00690	VIT_05s0020g01140	VIT_15s0048g01530	VIT_11s0016g00400	VIT_07s0141g00890	VIT_14s0066g01020			VIT_02s0025g04660
VIT_09s0002g07500	VIT_02s0025g03010	VIT_02s0012g01010	VIT_01s0026g02040	VIT_18s0041g00280		VIT_18s0089g01270	VIT_06s0004g05460	VIT_09s0002g08410	VIT_15s0021g01880	VIT_13s0139g00140	VIT_00s0207g00250	VIT_18s0001g04150	VIT_02s0154g00220	VIT_01s0026g01000	VIT_08s0007g02920	VIT_12s0034g01930	VIT_05s0077g00590	VIT_19s0014g04900	VIT_16s0039g01560	VIT_12s0035g00570	VIT_04s0008g01000			VIT_00s1995g00010
VIT_11s0037g00440	VIT_17s0000g08170	VIT_07s0031g00120	VIT_12s0028g03790	VIT_12s0034g02390		VIT_16s0098g01060	VIT_07s0031g02200	VIT_13s0067g02220	VIT_00s0527g00030	VIT_18s0001g11610	VIT_19s0015g00490	VIT_04s0008g02070	VIT_06s0061g00150	VIT_11s0118g00410	VIT_15s0021g02790	VIT_14s0060g02760	VIT_12s0142g00200	VIT_13s0064g00390	VIT_08s0007g04560	VIT_15s0048g01690	VIT_14s0171g00160			VIT_00s2576g00010
VIT_07s0031g01160	VIT_02s0025g02140	VIT_17s0000g01700	VIT_13s0019g01440	VIT_18s0001g14480		VIT_01s0127g00560	VIT_01s0137g00460	VIT_19s0015g01290	VIT_12s0055g00800	VIT_18s0001g09080	VIT_09s0002g00630	VIT_11s0016g01060	VIT_09s0002g01590	VIT_15s0046g02390	VIT_00s0259g00110	VIT_14s0128g00570	VIT_15s0024g00390	VIT_08s0007g00580	VIT_01s0010g02420	VIT_07s0031g00980	VIT_01s0026g02490			VIT_14s0060g01280
VIT_06s0004g07230	VIT_00s2341g00010	VIT_18s0001g14770	VIT_05s0102g00620	VIT_15s0046g03380		VIT_03s0038g01930	VIT_05s0020g04680	VIT_13s0074g00550	VIT_08s0040g00070	VIT_14s0060g00310	VIT_01s0011g04840	VIT_01s0011g06140	VIT_00s0259g00180	VIT_01s0011g03070	VIT_08s0007g04020	VIT_14s0128g00680	VIT_06s0004g03300	VIT_02s0087g00380	VIT_04s0069g00920	VIT_12s0055g00920	VIT_12s0028g00260			VIT_11s0037g00290
VIT_00s0220g00160	VIT_08s0007g00130	VIT_05s0020g03170	VIT_18s0001g14640	VIT_18s0001g06270		VIT_07s0031g03090	VIT_07s0141g00270	VIT_18s0001g03230	VIT_06s0009g01200	VIT_18s0001g01440	VIT_05s0077g01920	VIT_19s0014g04650	VIT_19s0085g00520	VIT_07s0005g00820	VIT_15s0048g00870	VIT_12s0034g01900	VIT_00s0323g00080	VIT_11s0016g02760	VIT_01s0010g03630	VIT_03s0091g00520	VIT_13s0019g04740			VIT_16s0013g00590
VIT_03s0038g00360	VIT_00s0194g00030	VIT_17s0000g08900	VIT_12s0028g03550	VIT_03s0063g01790		VIT_18s0001g06220	VIT_15s0048g02860	VIT_07s0005g02620	VIT_10s0042g01150	VIT_18s0001g13140	VIT_11s0037g00940	VIT_12s0134g00240	VIT_11s0103g00760	VIT_01s0011g04410	VIT_01s0127g00730	VIT_03s0063g01820	VIT_05s0020g04190	VIT_08s0007g08020	VIT_12s0134g00400	VIT_16s0050g01430	VIT_04s0044g00550			VIT_14s0128g00650
VIT_10s0003g00470	VIT_00s0323g00030	VIT_01s0026g01060	VIT_11s0052g00100	VIT_04s0008g03060		VIT_12s0057g00720	VIT_17s0053g00990	VIT_01s0011g02280	VIT_10s0042g01180	VIT_12s0028g02490	VIT_05s0020g04490	VIT_18s0001g03620	VIT_07s0197g00060	VIT_06s0009g01810	VIT_14s0066g01220	VIT_13s0064g01480	VIT_08s0007g07180	VIT_01s0011g03000	VIT_09s0054g00530	VIT_03s0088g01180	VIT_00s1764g00010			VIT_08s0058g00640
VIT_03s0038g04670	VIT_02s0025g04170	VIT_17s0000g07770	VIT_13s0067g01350	VIT_00s0880g00020		VIT_00s1306g00010	VIT_09s0002g05160	VIT_02s0241g00110	VIT_06s0061g01040	VIT_15s0046g01360	VIT_12s0028g03790	VIT_00s1679g00010	VIT_18s0001g11390	VIT_19s0177g00320	VIT_09s0002g01380	VIT_14s0068g01440	VIT_11s0016g03510	VIT_08s0007g07990	VIT_10s0042g01070	VIT_03s0091g00540	VIT_02s0025g04980			VIT_17s0000g05360
VIT_15s0046g01280	VIT_16s0022g00510	VIT_11s0016g01880	VIT_11s0037g00040	VIT_08s0007g07180		VIT_09s0002g08660	VIT_19s0014g00080	VIT_03s0088g01040	VIT_17s0053g00680	VIT_05s0077g00540	VIT_13s0019g01440	VIT_01s0010g02450	VIT_02s0154g00400	VIT_08s0040g00400	VIT_05s0077g00950	VIT_06s0004g06730	VIT_11s0016g04620	VIT_08s0007g07330	VIT_07s0031g01270	VIT_05s0020g03280	VIT_14s0060g02090			VIT_14s0128g00610
VIT_09s0002g05080	VIT_04s0008g01550	VIT_14s0171g00400	VIT_15s0046g01440	VIT_18s0001g04160		VIT_08s0040g01040	VIT_08s0040g01470	VIT_09s0002g05250	VIT_08s0040g02290	VIT_08s0007g01350	VIT_05s0102g00620	VIT_14s0083g01140	VIT_08s0056g00050	VIT_14s0030g00410	VIT_17s0000g02900	VIT_08s0040g01190	VIT_14s0060g01630	VIT_06s0004g00440	VIT_08s0040g02950	VIT_14s0030g00650	VIT_19s0015g01090			VIT_14s0128g00660
VIT_14s0068g02150	VIT_08s0058g00390	VIT_02s0025g04650	VIT_05s0020g01090	VIT_18s0076g00310		VIT_19s0085g01110	VIT_13s0067g03490	VIT_04s0044g01170	VIT_17s0000g09090	VIT_16s0050g02310	VIT_19s0014g03310	VIT_01s0026g01640	VIT_00s0226g00070	VIT_11s0016g03170	VIT_01s0011g04490	VIT_05s0020g00930	VIT_14s0006g01880	VIT_10s0003g03810	VIT_03s0038g02160	VIT_14s0030g00670	VIT_06s0004g05770			VIT_14s0128g00620
VIT_08s0007g07120	VIT_12s0028g01800	VIT_01s0011g05170	VIT_05s0077g01450	VIT_10s0003g01680		VIT_08s0040g01140	VIT_13s0067g03430	VIT_04s0043g00370	VIT_04s0008g05830	VIT_06s0061g01040	VIT_18s0001g09670	VIT_13s0067g02280	VIT_01s0026g01550	VIT_13s0019g00350	VIT_19s0014g04860	VIT_02s0025g01590	VIT_00s0299g00030	VIT_08s0007g08000	VIT_04s0008g03950	VIT_16s0039g02500	VIT_02s0025g04170			VIT_14s0128g00540
VIT_06s0004g07790	VIT_05s0020g03900	VIT_00s1194g00010	VIT_07s0129g00670	VIT_00s0304g00080		VIT_18s0001g07340	VIT_01s0011g06190	VIT_05s0077g00030	VIT_15s0048g01880	VIT_15s0048g02370	VIT_10s0042g01180	VIT_09s0002g02700	VIT_18s0001g08410	VIT_00s0404g00040	VIT_19s0090g00480	VIT_14s0066g01830	VIT_00s0338g00010	VIT_00s1306g00020	VIT_11s0016g03240	VIT_14s0030g00660	VIT_13s0019g02840			VIT_18s0001g02810
VIT_14s0006g02950	VIT_13s0067g01820	VIT_11s0052g00630	VIT_13s0064g00860	VIT_12s0028g01670		VIT_06s0080g01160	VIT_15s0048g02540	VIT_08s0058g00150	VIT_12s0057g01300	VIT_02s0025g03000	VIT_13s0067g01450	VIT_11s0016g02070	VIT_18s0001g08380	VIT_19s0014g03510	VIT_14s0219g00140	VIT_14s0006g02900	VIT_12s0034g00210	VIT_15s0046g01360	VIT_12s0028g01360	VIT_08s0056g01530	VIT_16s0022g00510			VIT_05s0020g03080
VIT_17s0000g03720	VIT_13s0019g00250	VIT_19s0090g01230	VIT_19s0085g00520	VIT_16s0013g01520		VIT_14s0068g00260	VIT_16s0013g00970	VIT_12s0035g01190	VIT_03s0038g03660	VIT_01s0026g00350	VIT_06s0004g03330	VIT_05s0049g00460	VIT_15s0021g01880	VIT_10s0042g01150	VIT_10s0003g04970	VIT_14s0066g01820	VIT_15s0046g01070	VIT_11s0016g05830	VIT_10s0003g01100	VIT_08s0058g00990	VIT_13s0019g02850			VIT_02s0025g01410
VIT_13s0019g02040	VIT_04s0008g01750	VIT_04s0023g01320	VIT_07s0031g02160	VIT_06s0004g07060		VIT_17s0000g03990	VIT_16s0013g00990	VIT_07s0005g02950	VIT_17s0000g08080	VIT_05s0124g00240	VIT_14s0060g01010	VIT_01s0146g00150	VIT_00s0732g00010	VIT_10s0042g01180	VIT_14s0060g00550	VIT_01s0011g04160	VIT_04s0008g07110	VIT_03s0063g01760	VIT_18s0001g01630	VIT_07s0129g00360	VIT_05s0020g04090			VIT_18s0122g01170
VIT_10s0092g00590	VIT_16s0100g00650	VIT_13s0019g04070	VIT_16s0039g01900	VIT_19s0014g03920		VIT_08s0040g01130	VIT_02s0025g04460	VIT_01s0010g02010	VIT_00s0524g00030	VIT_01s0244g00010	VIT_15s0048g02820	VIT_05s0077g01540	VIT_00s0299g00100	VIT_00s0484g00030	VIT_01s0127g00260	VIT_14s0068g01500	VIT_08s0007g02440	VIT_03s0017g01450	VIT_16s0039g00340	VIT_08s0058g00980	VIT_11s0016g03940			VIT_13s0064g01480
VIT_06s0009g00440	VIT_01s0010g03380	VIT_06s0004g00570	VIT_12s0028g03100	VIT_18s0001g06080		VIT_02s0154g00520	VIT_16s0013g00980	VIT_01s0010g01950	VIT_04s0008g04250	VIT_00s1314g00010	VIT_15s0046g01440	VIT_08s0007g06060	VIT_03s0091g01010	VIT_13s0019g00830	VIT_06s0004g06700	VIT_01s0011g05200	VIT_11s0206g00110	VIT_03s0091g00420	VIT_04s0008g04490	VIT_14s0068g01920	VIT_13s0019g03000			VIT_06s0004g01480
VIT_03s0038g03530	VIT_11s0016g04620	VIT_18s0001g11170	VIT_18s0041g01220	VIT_17s0000g04750		VIT_08s0032g00670	VIT_12s0059g00280	VIT_01s0010g01960	VIT_11s0016g04960	VIT_00s1312g00010	VIT_08s0007g03640	VIT_08s0007g06030	VIT_00s1241g00010	VIT_13s0175g00150	VIT_15s0048g00940	VIT_06s0004g02100	VIT_14s0006g01570	VIT_02s0025g01320	VIT_11s0016g04910	VIT_11s0078g00290	VIT_13s0019g02770			VIT_06s0004g01470
VIT_00s0371g00100	VIT_13s0019g01840	VIT_09s0002g02940	VIT_02s0025g01220	VIT_18s0001g07470		VIT_06s0004g03440	VIT_10s0003g00140	VIT_04s0044g00920	VIT_18s0001g07340	VIT_18s0001g08600	VIT_05s0020g01090	VIT_14s0108g00890	VIT_08s0007g00410	VIT_17s0000g00530	VIT_06s0004g08420	VIT_18s0001g07680	VIT_17s0000g09770	VIT_08s0007g08040	VIT_01s0026g02620	VIT_11s0016g01640	VIT_07s0005g02410			VIT_02s0025g04410
VIT_17s0000g02970	VIT_15s0107g00320	VIT_02s0012g00150	VIT_04s0008g00880	VIT_00s0471g00020		VIT_08s0007g02470	VIT_16s0013g00900	VIT_04s0044g01670	VIT_00s1206g00010	VIT_13s0067g02280	VIT_00s0541g00020	VIT_08s0007g06040	VIT_07s0005g02480	VIT_04s0023g03480	VIT_01s0010g02590	VIT_14s0081g00670	VIT_07s0005g00830	VIT_10s0116g01580	VIT_03s0038g00950	VIT_18s0001g00340	VIT_17s0000g02530			VIT_05s0020g04540
VIT_00s0477g00030	VIT_06s0061g00070	VIT_18s0089g00050	VIT_10s0003g04670	VIT_17s0000g05180		VIT_13s0084g00820	VIT_16s0013g00950	VIT_14s0036g01030	VIT_10s0071g00770	VIT_10s0003g01170	VIT_04s0008g05210	VIT_03s0091g00810	VIT_17s0000g01890	VIT_01s0011g05300	VIT_15s0046g03200	VIT_04s0008g07080	VIT_15s0048g01120	VIT_01s0011g02660	VIT_09s0002g05160	VIT_18s0122g01150	VIT_15s0048g02080			VIT_14s0108g01660
VIT_17s0000g02520	VIT_12s0034g01430	VIT_06s0009g00690	VIT_01s0026g01550	VIT_06s0009g01600		VIT_09s0002g00450	VIT_12s0028g03270	VIT_14s0081g00350	VIT_07s0031g02900	VIT_06s0004g07700	VIT_09s0002g02490	VIT_15s0046g02300	VIT_01s0010g00410	VIT_06s0004g04530	VIT_01s0026g01720	VIT_11s0016g00970	VIT_05s0077g02150	VIT_01s0026g00290	VIT_02s0154g00010	VIT_16s0039g01170	VIT_06s0061g00430			VIT_11s0065g00360
VIT_02s0025g02500	VIT_14s0171g00340	VIT_02s0154g00260	VIT_15s0048g02870	VIT_13s0067g03220		VIT_14s0066g00400	VIT_11s0016g04080	VIT_11s0016g01670	VIT_07s0031g01170	VIT_17s0000g00430	VIT_01s0026g02580	VIT_04s0044g00250	VIT_01s0026g01910	VIT_05s0020g04560	VIT_15s0048g01730	VIT_12s0028g03230	VIT_04s0023g01240	VIT_01s0011g02600	VIT_18s0001g13980	VIT_16s0039g01100	VIT_08s0007g06150			VIT_17s0000g01090
VIT_17s0053g00380	VIT_01s0244g00100	VIT_02s0033g00800	VIT_13s0019g02430	VIT_01s0026g00770		VIT_13s0067g01020	VIT_08s0007g05860	VIT_11s0016g01650	VIT_10s0116g01210	VIT_09s0002g02700	VIT_14s0108g00980	VIT_03s0038g03430	VIT_00s0174g00170	VIT_01s0010g00710	VIT_13s0067g00330	VIT_04s0023g00590	VIT_08s0007g05130	VIT_08s0007g08010	VIT_15s0048g02860	VIT_11s0016g01520	VIT_13s0067g00270			VIT_13s0067g02060
VIT_00s0253g00150	VIT_17s0000g03990	VIT_17s0000g05040	VIT_01s0011g04760	VIT_16s0039g01420		VIT_08s0007g05130	VIT_11s0052g01650	VIT_05s0094g01320	VIT_18s0001g04790	VIT_10s0003g01160	VIT_05s0077g01450	VIT_05s0077g00510	VIT_15s0048g02660	VIT_11s0052g00170	VIT_18s0001g15420	VIT_00s1339g00010	VIT_05s0062g00460	VIT_17s0000g10270	VIT_17s0053g00990	VIT_11s0016g01660	VIT_09s0002g00610			VIT_15s0048g02720
VIT_09s0018g01820	VIT_07s0031g02900	VIT_08s0007g07310	VIT_08s0056g00800	VIT_18s0122g01370		VIT_15s0045g01490	VIT_11s0016g02550	VIT_08s0040g02750	VIT_01s0011g03210	VIT_02s0012g01450	VIT_01s0011g06200	VIT_00s2527g00010	VIT_12s0028g03350	VIT_03s0063g00610	VIT_06s0004g03130	VIT_00s0471g00050	VIT_00s0705g00010	VIT_18s0001g08590	VIT_18s0001g10690	VIT_16s0039g01130	VIT_00s0616g00020			VIT_02s0025g01730
VIT_19s0015g01370	VIT_13s0019g02490	VIT_19s0090g01090	VIT_06s0080g00780	VIT_12s0028g01730		VIT_18s0001g09650	VIT_12s0134g00240	VIT_04s0008g03530	VIT_08s0007g02470	VIT_14s0068g01200	VIT_11s0016g01740	VIT_11s0016g02200	VIT_17s0000g01260	VIT_06s0004g05120	VIT_18s0001g13930	VIT_11s0016g02300	VIT_10s0003g00440	VIT_05s0077g00540	VIT_09s0002g03520	VIT_00s0480g00030	VIT_08s0007g07210			VIT_09s0002g07860
VIT_18s0001g14440	VIT_15s0048g01170	VIT_14s0068g00140	VIT_08s0007g04560	VIT_17s0000g08810		VIT_06s0061g00450	VIT_09s0002g05990	VIT_11s0016g01530	VIT_08s0007g02440	VIT_01s0026g01140	VIT_11s0016g02790	VIT_14s0083g00340	VIT_04s0023g02780	VIT_05s0077g01480	VIT_02s0025g01740	VIT_01s0011g03660	VIT_15s0045g01490	VIT_14s0068g00040	VIT_17s0000g07580	VIT_00s0480g00040	VIT_05s0020g03450			VIT_07s0005g01240
VIT_18s0001g01110	VIT_13s0019g02530	VIT_13s0019g03530	VIT_12s0028g03350	VIT_07s0031g00040		VIT_08s0007g02700	VIT_15s0046g01310	VIT_11s0016g02750	VIT_19s0090g00310	VIT_05s0029g00390	VIT_07s0104g01460	VIT_17s0000g07670	VIT_02s0025g04590	VIT_13s0067g03430	VIT_17s0000g02420	VIT_18s0001g08320	VIT_17s0000g01790	VIT_19s0090g00710	VIT_02s0012g00570	VIT_11s0016g02830	VIT_05s0020g01140			VIT_07s0005g00510
VIT_11s0016g02410	VIT_13s0019g02540	VIT_08s0056g01610	VIT_18s0001g10030	VIT_01s0011g05520		VIT_15s0048g01530	VIT_04s0008g02670	VIT_00s0256g00030	VIT_07s0031g01420	VIT_18s0072g00470	VIT_19s0015g00440	VIT_03s0063g02640	VIT_12s0028g02520	VIT_07s0104g01390	VIT_01s0011g04860	VIT_14s0030g01610	VIT_01s0010g01650	VIT_06s0004g02650	VIT_11s0016g03350	VIT_18s0157g00140	VIT_14s0108g00850			VIT_09s0002g06990
VIT_06s0004g04140	VIT_15s0048g01180	VIT_12s0028g03900	VIT_06s0004g01930	VIT_11s0037g00730		VIT_12s0134g00020	VIT_12s0059g02280	VIT_11s0016g01550	VIT_17s0000g08360	VIT_18s0001g13740	VIT_12s0057g01010	VIT_14s0068g01440	VIT_15s0046g01510	VIT_02s0025g03310	VIT_08s0040g01230	VIT_17s0000g02050	VIT_15s0021g01080	VIT_07s0129g00560	VIT_13s0067g01960	VIT_08s0007g04670	VIT_13s0019g04300			VIT_06s0061g01110
VIT_07s0129g01050	VIT_18s0041g00710	VIT_08s0056g00990	VIT_17s0000g06610	VIT_18s0001g12650		VIT_10s0071g00250	VIT_04s0023g02120	VIT_12s0034g00030	VIT_15s0021g02790	VIT_14s0030g02200	VIT_19s0085g00520	VIT_11s0016g04700	VIT_14s0030g01860	VIT_00s0229g00020	VIT_03s0038g02140	VIT_07s0031g01130	VIT_19s0014g04800	VIT_02s0087g00780	VIT_03s0063g00460	VIT_01s0011g06600	VIT_14s0030g01810			VIT_08s0007g02000
VIT_17s0000g07510	VIT_18s0001g12690	VIT_11s0037g00020	VIT_08s0058g01270	VIT_13s0064g01470		VIT_12s0028g03480	VIT_11s0016g03830	VIT_03s0017g02110	VIT_17s0000g01110	VIT_19s0014g01780	VIT_11s0103g00760	VIT_13s0019g00040	VIT_13s0084g00800	VIT_04s0008g03770	VIT_17s0000g02750	VIT_05s0020g04510	VIT_19s0014g04810	VIT_08s0040g01820	VIT_11s0016g03560	VIT_04s0008g05350	VIT_14s0068g01950			VIT_15s0046g02400
VIT_14s0108g01070	VIT_08s0007g07740	VIT_17s0000g04470	VIT_05s0020g02860	VIT_00s0647g00010		VIT_18s0001g08760	VIT_04s0008g01400	VIT_15s0046g01970	VIT_00s0259g00110	VIT_12s0028g02590	VIT_07s0005g02110	VIT_03s0017g00550	VIT_07s0141g00680	VIT_18s0001g02420	VIT_18s0001g03610	VIT_11s0016g02380	VIT_02s0087g00930	VIT_18s0001g06560	VIT_07s0141g00690	VIT_11s0016g02280	VIT_05s0029g00020			VIT_13s0019g01990
VIT_12s0055g00510	VIT_12s0059g01750	VIT_14s0108g00990	VIT_06s0004g02930	VIT_12s0134g00160		VIT_00s1306g00020	VIT_11s0016g00200	VIT_13s0019g03430	VIT_18s0122g00700	VIT_08s0007g07550	VIT_07s0197g00060	VIT_13s0067g00240	VIT_01s0026g02450	VIT_06s0061g01030	VIT_17s0000g04810	VIT_10s0597g00050	VIT_03s0063g00380	VIT_09s0002g04470	VIT_00s0662g00030	VIT_04s0069g00860	VIT_07s0191g00060			VIT_08s0007g09000
VIT_19s0027g00230	VIT_02s0033g00260	VIT_03s0091g01040	VIT_17s0000g09350	VIT_04s0023g03920		VIT_15s0046g01360	VIT_08s0040g02210	VIT_17s0000g08660	VIT_03s0132g00070	VIT_04s0023g02880	VIT_12s0028g03100	VIT_10s0071g00810	VIT_17s0000g06200	VIT_04s0008g07110	VIT_14s0083g00940	VIT_01s0127g00540	VIT_05s0051g00670	VIT_18s0001g13140	VIT_18s0001g10150	VIT_17s0000g07670	VIT_17s0000g00980			VIT_02s0025g04620
VIT_01s0026g02710	VIT_11s0052g01090	VIT_18s0041g01630	VIT_04s0008g04150	VIT_04s0023g03900		VIT_12s0057g00950	VIT_16s0022g01640	VIT_01s0011g06260	VIT_11s0052g00160	VIT_18s0001g12220	VIT_18s0041g01220	VIT_15s0048g02070	VIT_00s0199g00250	VIT_13s0019g01980	VIT_00s0184g00110	VIT_01s0127g00560	VIT_00s0187g00080	VIT_01s0137g00680	VIT_11s0016g04080	VIT_16s0098g01510	VIT_19s0090g01570			VIT_01s0010g03940
VIT_13s0074g00720	VIT_16s0098g00850	VIT_08s0007g08600	VIT_04s0008g03950	VIT_14s0128g00850		VIT_03s0091g00420	VIT_15s0048g02740	VIT_06s0004g06320	VIT_01s0011g03190	VIT_14s0060g02440	VIT_06s0004g04950	VIT_05s0020g00440	VIT_12s0134g00400	VIT_19s0085g01110	VIT_07s0141g00270	VIT_04s0023g03190	VIT_01s0011g02710	VIT_02s0025g03000	VIT_12s0028g03270	VIT_10s0042g00090	VIT_04s0023g03210			VIT_03s0088g01140
VIT_17s0000g07790	VIT_08s0040g00780	VIT_14s0068g01870	VIT_05s0020g04110	VIT_08s0056g01170		VIT_01s0026g00290	VIT_15s0046g01810	VIT_08s0007g01810	VIT_17s0000g04020	VIT_01s0010g02090	VIT_16s0050g00950	VIT_09s0002g05810	VIT_19s0014g03960	VIT_04s0008g07250	VIT_19s0090g00900	VIT_09s0002g00970	VIT_05s0020g04490	VIT_05s0029g00390	VIT_08s0040g01250	VIT_11s0052g01150	VIT_18s0001g06290			VIT_11s0065g00030
VIT_03s0038g03730	VIT_03s0063g00140	VIT_17s0000g07910	VIT_14s0068g01570	VIT_02s0025g02900		VIT_18s0001g08590	VIT_05s0020g01460	VIT_03s0038g03910	VIT_18s0001g13260	VIT_04s0008g01160	VIT_04s0023g01660	VIT_12s0055g01160	VIT_13s0067g02880	VIT_10s0116g01210	VIT_12s0057g00460	VIT_06s0009g03670	VIT_05s0102g00600	VIT_05s0124g00240	VIT_04s0008g04270	VIT_01s0011g03500	VIT_00s0260g00080			VIT_14s0081g00670
VIT_18s0001g03910	VIT_07s0031g00350	VIT_14s0128g00360	VIT_01s0011g00830			VIT_08s0007g01350	VIT_16s0050g02680	VIT_03s0063g01820	VIT_18s0041g00330	VIT_15s0021g02720	VIT_08s0105g00230	VIT_12s0121g00300	VIT_15s0046g02070	VIT_04s0008g07150	VIT_11s0016g03540	VIT_06s0009g03680	VIT_08s0056g01610	VIT_01s0244g00010	VIT_11s0016g03740	VIT_12s0034g02560	VIT_18s0072g00340			VIT_15s0045g01130
VIT_12s0059g01240	VIT_01s0010g01650	VIT_03s0097g00510	VIT_00s0333g00050			VIT_18s0001g06560	VIT_00s1328g00020	VIT_00s0184g00010	VIT_16s0100g00520	VIT_00s1356g00010	VIT_02s0025g02590	VIT_12s0055g01280	VIT_12s0057g01330	VIT_00s0510g00050	VIT_03s0038g00950	VIT_17s0000g07960	VIT_17s0000g02850	VIT_00s1312g00010	VIT_09s0002g01150	VIT_06s0009g01080	VIT_06s0004g00360			VIT_05s0020g02290
VIT_03s0063g00370	VIT_09s0054g01470	VIT_18s0001g10830	VIT_08s0007g02360			VIT_05s0077g00540	VIT_16s0098g01160	VIT_07s0005g00820	VIT_01s0011g01730	VIT_12s0057g00570	VIT_15s0048g02870	VIT_18s0122g01340	VIT_06s0004g08080	VIT_08s0007g02470	VIT_14s0068g00740	VIT_12s0028g02220	VIT_18s0001g00360	VIT_05s0020g04780	VIT_14s0006g01250	VIT_04s0044g01160	VIT_09s0002g01460			VIT_14s0060g01530
VIT_12s0035g01410	VIT_13s0019g03360	VIT_00s0207g00130	VIT_03s0132g00070			VIT_15s0048g02370	VIT_13s0073g00050	VIT_06s0009g01810	VIT_14s0006g02890	VIT_19s0090g01780	VIT_13s0019g02430	VIT_03s0063g02320	VIT_08s0040g02950	VIT_17s0000g03880	VIT_15s0021g01540	VIT_13s0019g00390	VIT_18s0001g10640	VIT_13s0067g02280	VIT_05s0020g00820	VIT_05s0049g01980	VIT_07s0005g02160			VIT_13s0067g03120
VIT_02s0012g01350	VIT_08s0007g01910	VIT_07s0005g05520	VIT_03s0063g00310			VIT_09s0002g02700	VIT_13s0084g00090	VIT_03s0017g01920	VIT_14s0006g01080	VIT_06s0004g07210	VIT_07s0005g01210	VIT_07s0005g01450	VIT_08s0007g01530	VIT_08s0007g02450	VIT_06s0009g00880	VIT_13s0019g00910	VIT_00s0181g00260	VIT_12s0028g02590	VIT_12s0059g02280	VIT_13s0064g01720	VIT_14s0030g01620			VIT_01s0010g02770
VIT_05s0049g00760	VIT_13s0019g02150	VIT_11s0016g00330	VIT_04s0008g01420			VIT_05s0029g00390	VIT_19s0015g01160	VIT_15s0021g02060	VIT_14s0060g02380	VIT_18s0122g01010	VIT_17s0000g06190	VIT_19s0014g01780	VIT_04s0023g03550	VIT_14s0006g00180	VIT_11s0016g05590	VIT_13s0019g04090	VIT_18s0001g09250	VIT_01s0011g05570	VIT_02s0025g04060	VIT_11s0016g00220	VIT_01s0150g00310			VIT_01s0011g03660
VIT_03s0063g01770	VIT_07s0104g01390	VIT_15s0046g01060	VIT_04s0008g04490			VIT_01s0026g00350	VIT_14s0066g01580	VIT_00s0404g00040	VIT_07s0104g01790	VIT_07s0005g02950	VIT_11s0016g01320	VIT_08s0007g06160	VIT_17s0000g02470	VIT_02s0154g00520	VIT_09s0018g01240	VIT_18s0001g02260	VIT_07s0104g00090	VIT_18s0001g14130	VIT_19s0014g04590	VIT_02s0025g00580	VIT_13s0019g00250			VIT_14s0030g01610
VIT_16s0098g00600	VIT_01s0127g00800	VIT_03s0088g00320	VIT_05s0020g02470			VIT_02s0012g01450	VIT_03s0063g02250	VIT_03s0038g00760	VIT_12s0059g00660	VIT_16s0098g01110	VIT_08s0056g00800	VIT_05s0077g01140	VIT_01s0011g00080	VIT_04s0023g00730	VIT_04s0008g03240	VIT_16s0013g00220	VIT_13s0064g01290	VIT_12s0057g00570	VIT_12s0142g00760	VIT_07s0005g00410	VIT_08s0007g06890			VIT_01s0010g00240
VIT_18s0001g08160	VIT_08s0007g08030	VIT_05s0049g01550	VIT_14s0066g01040			VIT_06s0004g01740	VIT_02s0012g01250	VIT_18s0001g09370	VIT_15s0048g00660	VIT_06s0009g01940	VIT_17s0000g02660	VIT_14s0030g02200	VIT_07s0104g01420	VIT_17s0000g05850	VIT_01s0026g02030	VIT_14s0108g01650	VIT_17s0000g00330	VIT_06s0004g07210	VIT_12s0034g02570	VIT_01s0026g00220	VIT_08s0007g03850			VIT_15s0048g00980
VIT_08s0056g01240	VIT_08s0007g00950	VIT_07s0191g00050	VIT_07s0031g02200			VIT_18s0001g08600	VIT_18s0001g07320	VIT_17s0000g01690	VIT_07s0005g02200	VIT_19s0090g01740	VIT_04s0008g01810	VIT_13s0019g01490	VIT_04s0008g01120	VIT_07s0031g01420	VIT_01s0011g02940	VIT_19s0085g01110	VIT_05s0077g01390	VIT_18s0117g00140	VIT_13s0067g03210	VIT_14s0108g00270	VIT_13s0064g01240			VIT_05s0049g00410
VIT_12s0028g01130	VIT_15s0024g00770	VIT_01s0182g00140	VIT_18s0001g15420			VIT_18s0001g08040	VIT_06s0004g02140	VIT_10s0042g01200	VIT_19s0090g00580	VIT_18s0001g08650	VIT_17s0000g07510	VIT_08s0007g04520	VIT_01s0010g02030	VIT_17s0000g05860	VIT_11s0037g01230	VIT_18s0001g00510	VIT_13s0019g02120	VIT_07s0129g00340	VIT_14s0066g00370	VIT_14s0108g00190	VIT_08s0007g03340			VIT_08s0007g08750
VIT_18s0001g11610	VIT_05s0102g00600	VIT_03s0017g01210	VIT_07s0141g00270			VIT_14s0068g01200	VIT_08s0007g04550	VIT_19s0014g04160	VIT_08s0007g02030	VIT_08s0007g03760	VIT_01s0026g01050	VIT_03s0038g01380	VIT_06s0061g01380	VIT_08s0007g01730	VIT_17s0000g00430	VIT_15s0021g02280	VIT_06s0004g02940	VIT_08s0007g03760	VIT_13s0019g02040	VIT_14s0068g01760	VIT_07s0129g00090			VIT_08s0007g02850
VIT_07s0130g00160	VIT_18s0001g10620	VIT_16s0022g01430	VIT_17s0000g06360			VIT_12s0028g02590	VIT_07s0151g00340	VIT_19s0014g04060	VIT_18s0001g15420	VIT_02s0025g04910	VIT_15s0046g02260	VIT_14s0108g01000	VIT_13s0084g00310	VIT_17s0000g01110	VIT_14s0060g01010	VIT_00s0510g00050	VIT_11s0016g02790	VIT_15s0048g01740	VIT_06s0004g07070	VIT_08s0007g08840	VIT_04s0008g03290			VIT_08s0040g02600
VIT_00s0181g00030	VIT_19s0015g00490	VIT_02s0012g00090	VIT_17s0053g00990			VIT_19s0014g01780	VIT_19s0085g00740	VIT_19s0014g04190	VIT_04s0079g00200	VIT_16s0098g01080	VIT_14s0068g01490	VIT_14s0030g02170	VIT_14s0068g00740	VIT_03s0132g00100	VIT_08s0007g07870	VIT_18s0001g13400	VIT_12s0028g03300	VIT_02s0012g01960	VIT_08s0007g04350	VIT_07s0005g02560	VIT_06s0004g03240			VIT_07s0031g00340
VIT_08s0007g01350	VIT_16s0050g02310	VIT_01s0011g05210	VIT_06s0004g07970			VIT_08s0007g07550	VIT_01s0150g00060	VIT_00s0353g00060	VIT_12s0028g01170	VIT_08s0007g06690	VIT_04s0023g03110	VIT_00s0252g00130	VIT_19s0015g01200	VIT_03s0132g00070	VIT_08s0040g01240	VIT_14s0083g00160	VIT_08s0032g01190	VIT_13s0019g03280	VIT_13s0019g02300	VIT_15s0046g01570	VIT_08s0040g02330			VIT_11s0037g00320
VIT_12s0057g00060	VIT_09s0002g03260	VIT_18s0001g12080	VIT_02s0012g00570			VIT_01s0010g02090	VIT_11s0016g04690	VIT_05s0094g01530	VIT_09s0002g00670	VIT_18s0001g13130	VIT_12s0055g00510	VIT_18s0001g01630	VIT_12s0035g00080	VIT_18s0001g12520	VIT_14s0108g00420	VIT_18s0001g14870	VIT_11s0103g00760	VIT_18s0001g11170	VIT_14s0006g01420	VIT_14s0081g00030	VIT_11s0037g00490			VIT_18s0001g13380
VIT_05s0049g00550	VIT_05s0077g01460	VIT_17s0000g04450	VIT_16s0098g00900			VIT_18s0001g12220	VIT_15s0048g00630	VIT_13s0084g00810	VIT_03s0038g00930	VIT_01s0026g01950	VIT_06s0080g00780	VIT_18s0001g11830	VIT_08s0007g02110	VIT_14s0006g02490	VIT_05s0077g00750	VIT_15s0048g01180	VIT_16s0098g00360	VIT_05s0077g01360	VIT_08s0058g00280	VIT_05s0094g00320	VIT_11s0037g00520			VIT_13s0019g04040
VIT_00s0780g00030	VIT_14s0083g00290	VIT_14s0060g02430	VIT_11s0016g03350			VIT_08s0007g06870	VIT_07s0031g01640	VIT_13s0067g02240	VIT_03s0038g02140	VIT_08s0007g04200	VIT_18s0001g02300	VIT_08s0007g05790	VIT_04s0008g01420	VIT_10s0116g01740	VIT_08s0058g00110	VIT_02s0087g00750	VIT_19s0085g00350	VIT_03s0038g03410	VIT_15s0046g01320	VIT_15s0046g01580	VIT_01s0026g01770			VIT_07s0031g00050
VIT_00s1466g00010	VIT_12s0028g03120	VIT_12s0059g01260	VIT_16s0100g00400			VIT_04s0023g01430	VIT_07s0031g02550	VIT_16s0098g01320	VIT_18s0001g03610	VIT_18s0001g06270	VIT_12s0028g03350	VIT_14s0030g02150	VIT_05s0049g02240	VIT_12s0028g02170	VIT_04s0023g02430	VIT_05s0020g05040	VIT_04s0023g02830	VIT_15s0048g02270	VIT_07s0185g00130	VIT_05s0094g00330	VIT_19s0014g00210			VIT_08s0007g02800
VIT_03s0063g01760	VIT_00s2015g00010	VIT_16s0098g00940	VIT_11s0016g04080			VIT_13s0158g00370	VIT_13s0019g02280	VIT_06s0004g06750	VIT_14s0083g00940	VIT_17s0000g07820	VIT_08s0040g01020	VIT_18s0122g00180	VIT_06s0004g05460	VIT_11s0037g00990	VIT_06s0004g06960	VIT_16s0098g00710	VIT_07s0197g00060	VIT_19s0014g02350	VIT_03s0088g00290	VIT_16s0050g02220	VIT_08s0007g00120			VIT_19s0085g01110
VIT_12s0057g00950	VIT_00s0125g00200	VIT_01s0011g04320	VIT_03s0097g00700			VIT_12s0057g00570	VIT_14s0108g00590	VIT_10s0003g01130	VIT_08s0007g01650	VIT_18s0001g09040	VIT_15s0048g01150	VIT_00s0179g00280	VIT_18s0001g02570	VIT_17s0000g04020	VIT_10s0003g01790	VIT_10s0003g02260	VIT_14s0081g00200	VIT_18s0122g00380	VIT_01s0011g05700	VIT_05s0094g00340	VIT_08s0040g00040			VIT_12s0028g00610
VIT_03s0063g01230	VIT_14s0083g00260	VIT_01s0127g00850	VIT_19s0014g01420			VIT_06s0004g07210	VIT_06s0080g01230	VIT_08s0058g01100	VIT_00s0313g00030	VIT_17s0000g03560	VIT_02s0025g04590	VIT_14s0060g01470	VIT_12s0059g01190	VIT_18s0001g01830	VIT_01s0026g00570	VIT_06s0009g03010	VIT_00s0670g00020	VIT_07s0129g00210	VIT_07s0031g02950	VIT_04s0008g00120	VIT_08s0032g00310			VIT_08s0007g08050
VIT_07s0031g01260	VIT_04s0044g00290	VIT_00s0480g00060	VIT_15s0046g02650			VIT_18s0122g01010	VIT_14s0060g01490	VIT_06s0004g05120	VIT_10s0003g04560	VIT_01s0011g00700	VIT_15s0046g01140	VIT_18s0001g11130	VIT_10s0116g00190	VIT_06s0004g02410	VIT_01s0026g01240	VIT_16s0098g00860	VIT_13s0019g01700	VIT_17s0000g06020	VIT_01s0011g03180	VIT_14s0108g00540	VIT_02s0025g01050			VIT_11s0206g00110
VIT_14s0068g01870	VIT_14s0060g01040	VIT_11s0016g04750	VIT_09s0002g05990			VIT_08s0040g00900	VIT_08s0040g02090	VIT_17s0000g07580	VIT_09s0002g00650	VIT_07s0031g02610	VIT_01s0010g03630	VIT_11s0016g01970	VIT_05s0062g01120	VIT_08s0007g04190	VIT_01s0011g05500	VIT_13s0019g03430	VIT_16s0098g01080	VIT_18s0117g00340	VIT_02s0025g03140	VIT_00s0615g00030	VIT_08s0007g02440			VIT_13s0019g02530
VIT_03s0063g01150	VIT_18s0001g12700	VIT_14s0083g00520	VIT_11s0016g03740			VIT_07s0005g02950	VIT_12s0028g01740	VIT_16s0050g00780	VIT_00s0184g00110	VIT_12s0035g02020	VIT_05s0020g04060	VIT_04s0008g01070	VIT_10s0003g04320	VIT_01s0011g01730	VIT_10s0003g03690	VIT_08s0007g07740	VIT_18s0001g11800	VIT_12s0035g00690	VIT_18s0001g03170	VIT_16s0100g00290	VIT_00s0199g00150			VIT_12s0057g01450
VIT_18s0001g03180	VIT_00s0187g00090	VIT_06s0061g00970	VIT_01s0244g00090			VIT_08s0056g00050	VIT_05s0020g04130	VIT_02s0025g03310	VIT_03s0038g01300	VIT_15s0048g02270	VIT_05s0102g00750	VIT_18s0001g03520	VIT_02s0025g01740	VIT_18s0001g14630	VIT_05s0051g00010	VIT_16s0100g01110	VIT_09s0054g01030	VIT_10s0042g01250	VIT_02s0012g01250	VIT_02s0154g00090	VIT_15s0048g01120			VIT_18s0041g01080
VIT_03s0063g01970	VIT_01s0011g02720	VIT_02s0154g00320	VIT_08s0040g02210			VIT_07s0129g00030	VIT_05s0049g01760	VIT_15s0048g01100	VIT_06s0061g00700	VIT_02s0025g02070	VIT_12s0134g00400	VIT_17s0000g08450	VIT_06s0009g03450	VIT_17s0000g03600	VIT_15s0046g02640	VIT_08s0040g00550	VIT_17s0000g06190	VIT_00s0956g00030	VIT_18s0001g07320	VIT_05s0077g00510	VIT_13s0019g02640			VIT_03s0017g02000
VIT_06s0061g01070	VIT_05s0077g00780	VIT_03s0017g02260	VIT_15s0048g02740			VIT_08s0007g03760	VIT_06s0004g00260	VIT_07s0031g01070	VIT_03s0038g00940	VIT_04s0044g00060	VIT_09s0054g00530	VIT_08s0007g04800	VIT_07s0141g00290	VIT_19s0138g00140	VIT_10s0003g03660	VIT_16s0100g01100	VIT_07s0005g03610	VIT_08s0058g01390	VIT_08s0007g00020	VIT_08s0007g08310	VIT_04s0023g01240			VIT_03s0017g02140
VIT_16s0098g01350	VIT_01s0011g03430	VIT_08s0056g00100	VIT_01s0137g00580			VIT_02s0025g04630	VIT_15s0021g00940	VIT_07s0031g01130	VIT_05s0062g00850	VIT_18s0122g00380	VIT_12s0059g02510	VIT_18s0001g10810	VIT_15s0046g00290	VIT_14s0006g01080	VIT_03s0038g00150	VIT_02s0033g00260	VIT_19s0027g00230	VIT_07s0031g01710	VIT_11s0016g05170	VIT_16s0022g00670	VIT_08s0007g05130			VIT_10s0003g00470
VIT_04s0023g03570	VIT_18s0001g14640	VIT_18s0166g00290	VIT_01s0150g00510			VIT_18s0001g13130	VIT_09s0054g01750	VIT_01s0011g03630	VIT_19s0090g00900	VIT_14s0068g01780	VIT_08s0058g01270	VIT_18s0001g10800	VIT_01s0026g02620	VIT_15s0048g00660	VIT_18s0001g05180	VIT_16s0100g01190	VIT_05s0020g01780	VIT_09s0018g00240	VIT_07s0151g00410	VIT_11s0016g05770	VIT_05s0062g00460			VIT_10s0003g00460
VIT_13s0019g05260	VIT_15s0024g00740	VIT_13s0019g01080	VIT_05s0094g01320			VIT_17s0000g05020	VIT_02s0025g01710	VIT_07s0005g03640	VIT_11s0016g03540	VIT_10s0003g00050	VIT_17s0000g07550	VIT_00s0698g00010	VIT_12s0134g00230	VIT_02s0154g00390	VIT_03s0038g01480	VIT_16s0100g01070	VIT_17s0000g09790	VIT_12s0059g00880	VIT_14s0108g01500	VIT_00s0229g00190	VIT_05s0062g00570			VIT_02s0033g00270
VIT_18s0001g00290	VIT_18s0001g10640	VIT_06s0004g04580	VIT_16s0098g01160			VIT_14s0068g01780	VIT_13s0019g01100	VIT_00s0742g00040	VIT_16s0098g01150	VIT_19s0014g02350	VIT_00s0475g00020	VIT_04s0044g00020	VIT_11s0016g03540	VIT_03s0063g00600	VIT_04s0023g02690	VIT_02s0025g00740	VIT_04s0008g01850	VIT_10s0003g01600	VIT_15s0048g00630	VIT_02s0025g01610	VIT_12s0028g02840			VIT_16s0100g01150
VIT_03s0063g01310	VIT_14s0068g00150	VIT_05s0049g01220	VIT_06s0004g06520			VIT_15s0021g02300	VIT_07s0005g04340	VIT_05s0029g01040	VIT_09s0054g00680	VIT_17s0000g05020	VIT_05s0077g01970	VIT_18s0122g01320	VIT_13s0067g02930	VIT_08s0007g02030	VIT_04s0008g04710	VIT_03s0063g00140	VIT_00s0199g00250	VIT_18s0001g12580	VIT_17s0000g03830	VIT_07s0031g00920	VIT_06s0080g00980			VIT_00s0615g00020
VIT_08s0007g05800	VIT_00s0187g00080	VIT_09s0002g08640	VIT_15s0046g02420			VIT_18s0122g00380	VIT_14s0108g01000	VIT_07s0031g00980	VIT_03s0038g00950	VIT_10s0042g00170	VIT_04s0023g03550	VIT_07s0005g02820	VIT_19s0027g00510	VIT_18s0001g12100	VIT_00s0179g00380	VIT_08s0007g02660	VIT_00s0347g00030	VIT_12s0035g01880	VIT_17s0000g02200	VIT_07s0005g04130	VIT_06s0004g07130			VIT_18s0122g00450
VIT_18s0001g10830	VIT_01s0011g02710	VIT_17s0000g08730	VIT_13s0019g04280			VIT_01s0026g02200	VIT_09s0002g06770	VIT_11s0016g02660	VIT_11s0016g03240	VIT_01s0026g02200	VIT_18s0001g03570	VIT_11s0016g01070	VIT_11s0016g00640	VIT_04s0044g01880	VIT_16s0050g00830	VIT_16s0100g01200	VIT_09s0054g00530	VIT_08s0007g03530	VIT_02s0025g00980	VIT_06s0004g06670	VIT_06s0004g06790			VIT_11s0052g01110
VIT_18s0041g00430	VIT_10s0042g01180	VIT_06s0004g06080	VIT_06s0004g02120			VIT_12s0035g00690	VIT_04s0023g02010	VIT_04s0008g03770	VIT_09s0002g03690	VIT_12s0035g00690	VIT_04s0008g03950	VIT_06s0009g01110	VIT_17s0053g00990	VIT_04s0023g00320	VIT_13s0064g01640	VIT_14s0066g01150	VIT_08s0040g02950	VIT_01s0026g01030	VIT_07s0031g01640	VIT_11s0052g01710	VIT_05s0051g00670			VIT_11s0016g02610
VIT_11s0016g00480	VIT_18s0001g09250	VIT_13s0067g03390	VIT_01s0011g00600			VIT_18s0122g01340	VIT_11s0118g00650	VIT_04s0008g06040	VIT_14s0068g00740	VIT_09s0054g01690	VIT_18s0072g00120	VIT_08s0007g00030	VIT_09s0002g04080	VIT_18s0001g06390	VIT_17s0000g04790	VIT_13s0019g04390	VIT_10s0003g00850	VIT_02s0025g01430	VIT_07s0031g02550	VIT_08s0007g01030	VIT_03s0063g00380			VIT_13s0064g00270
VIT_05s0049g01550	VIT_14s0066g00680	VIT_18s0001g13330	VIT_19s0015g00760			VIT_09s0054g01690	VIT_02s0012g02540	VIT_14s0068g01190	VIT_15s0021g01540	VIT_09s0002g00720	VIT_08s0007g03970	VIT_08s0056g01710	VIT_03s0038g00930	VIT_11s0016g01190	VIT_01s0026g01020	VIT_05s0077g00520	VIT_06s0004g05100	VIT_14s0066g01610	VIT_04s0008g05540	VIT_05s0062g00980	VIT_00s0533g00020			VIT_02s0025g00750
VIT_03s0063g01040	VIT_14s0128g00110	VIT_07s0104g00340	VIT_11s0016g05710			VIT_05s0020g01930	VIT_08s0007g05180	VIT_12s0028g01820	VIT_05s0049g02240	VIT_05s0020g01930	VIT_07s0104g01420	VIT_08s0058g00970	VIT_09s0002g08510	VIT_13s0064g01510	VIT_08s0007g07490	VIT_06s0004g07650	VIT_11s0016g02100	VIT_14s0060g01320	VIT_15s0021g02790	VIT_11s0118g00420	VIT_13s0064g00670			VIT_16s0100g01100
VIT_14s0068g01920	VIT_11s0052g00100	VIT_11s0052g00210	VIT_16s0039g00720			VIT_07s0005g01520	VIT_11s0149g00060	VIT_18s0001g04860	VIT_00s1353g00010	VIT_07s0005g01520	VIT_14s0068g01570	VIT_06s0004g07740	VIT_03s0038g01300	VIT_09s0002g00650	VIT_05s0020g01160	VIT_17s0000g09570	VIT_15s0046g02110	VIT_18s0001g14480	VIT_08s0007g00930	VIT_08s0007g01020	VIT_18s0001g03890			VIT_02s0012g01570
VIT_08s0040g02200	VIT_00s1312g00010	VIT_18s0117g00080	VIT_14s0066g01580			VIT_10s0003g01600	VIT_08s0007g01650	VIT_01s0011g05860	VIT_04s0008g03240	VIT_04s0008g01470	VIT_12s0028g03010	VIT_00s0587g00030	VIT_11s0078g00400	VIT_05s0020g04680	VIT_17s0000g07470	VIT_02s0012g02820	VIT_03s0038g00850	VIT_08s0007g01430	VIT_18s0001g00190	VIT_11s0016g05010	VIT_00s0194g00190			VIT_16s0100g01070
VIT_09s0002g00750	VIT_02s0154g00220	VIT_18s0089g00100	VIT_13s0047g00010			VIT_11s0052g00450	VIT_11s0016g02520	VIT_18s0001g02420	VIT_13s0067g01350	VIT_10s0003g01600	VIT_01s0011g00830	VIT_02s0025g00430	VIT_05s0020g02630	VIT_14s0030g02310	VIT_03s0038g00840	VIT_18s0001g04280	VIT_07s0129g00690	VIT_14s0060g01300	VIT_12s0028g01600	VIT_07s0005g03570	VIT_02s0025g01080			VIT_16s0039g02040
VIT_08s0105g00470	VIT_01s0011g04260	VIT_13s0084g00060	VIT_03s0063g02250			VIT_14s0108g01280	VIT_15s0021g02070	VIT_06s0061g01030	VIT_01s0010g00740	VIT_01s0026g01730	VIT_19s0014g05430	VIT_19s0014g02860	VIT_16s0098g00900	VIT_14s0030g01980	VIT_14s0083g01110	VIT_18s0001g04120	VIT_09s0002g00220	VIT_02s0012g00150	VIT_08s0217g00090	VIT_15s0046g01450	VIT_13s0175g00130			VIT_16s0100g01130
VIT_01s0026g02330	VIT_19s0085g00890	VIT_14s0030g00960	VIT_15s0046g01370			VIT_18s0001g07140	VIT_00s0264g00050	VIT_18s0001g03660	VIT_14s0128g00110	VIT_14s0108g01280	VIT_00s0333g00050	VIT_01s0137g00430	VIT_15s0048g02540	VIT_03s0038g03500	VIT_05s0020g02070	VIT_02s0087g00710	VIT_08s0032g01220	VIT_03s0038g02280	VIT_01s0011g04820	VIT_14s0128g00520	VIT_17s0000g04470			VIT_16s0100g01200
VIT_03s0063g01750	VIT_07s0197g00060	VIT_13s0084g00510	VIT_05s0077g00810			VIT_19s0090g00400	VIT_08s0040g00540	VIT_00s0434g00090	VIT_08s0007g07870	VIT_01s0011g03820	VIT_01s0011g06140	VIT_18s0072g00370	VIT_08s0040g03120	VIT_06s0061g00700	VIT_08s0058g00500	VIT_18s0001g01280	VIT_17s0000g09370	VIT_15s0046g02110	VIT_10s0003g00260	VIT_18s0001g02770	VIT_18s0001g08970			VIT_16s0100g00550
VIT_06s0004g05230	VIT_11s0016g01160	VIT_13s0139g00220	VIT_05s0020g00480			VIT_02s0025g01430	VIT_13s0064g00900	VIT_19s0090g01350	VIT_05s0077g00750	VIT_17s0000g08570	VIT_09s0002g03690	VIT_18s0122g00120	VIT_18s0001g12970	VIT_15s0048g00530	VIT_10s0003g04280	VIT_04s0023g01960	VIT_19s0014g02830	VIT_07s0005g00660	VIT_05s0029g00500	VIT_05s0077g01150	VIT_13s0067g00360			VIT_17s0000g04930
VIT_18s0122g00320	VIT_02s0025g04000	VIT_08s0007g04750	VIT_17s0000g00030			VIT_00s0583g00040	VIT_06s0004g06170	VIT_00s0434g00080	VIT_00s2739g00010	VIT_18s0001g10370	VIT_11s0016g01460	VIT_14s0066g01730	VIT_06s0004g03590	VIT_04s0023g00580	VIT_11s0016g00040	VIT_18s0075g00700	VIT_13s0064g01800	VIT_18s0001g05800	VIT_02s0012g02290	VIT_08s0007g06060	VIT_04s0023g01700			VIT_18s0072g01250
VIT_18s0122g00830	VIT_02s0025g01220	VIT_15s0048g02830	VIT_02s0012g01250			VIT_17s0000g02470	VIT_05s0020g00390	VIT_06s0080g01160	VIT_17s0000g03550	VIT_11s0037g01400	VIT_08s0056g00290	VIT_18s0001g08580	VIT_04s0008g05470	VIT_07s0031g03090	VIT_01s0011g06410	VIT_18s0075g00950	VIT_03s0063g00310	VIT_10s0116g00940	VIT_01s0010g03640	VIT_08s0007g06030	VIT_12s0034g01780			VIT_04s0044g02010
VIT_14s0006g01610	VIT_03s0091g01010	VIT_17s0000g08760	VIT_10s0116g01880			VIT_10s0003g04180	VIT_02s0025g02640	VIT_12s0028g00610	VIT_14s0081g00720	VIT_14s0081g00070	VIT_05s0102g01100	VIT_02s0012g02190	VIT_11s0052g00840	VIT_01s0026g01870	VIT_12s0059g01180	VIT_18s0001g00850	VIT_06s0004g05460	VIT_05s0077g02320	VIT_12s0028g01740	VIT_14s0083g01100	VIT_17s0000g03780			VIT_15s0021g01080
VIT_12s0028g01360	VIT_18s0001g09040	VIT_17s0000g09170	VIT_12s0028g01150			VIT_13s0067g02300	VIT_14s0171g00360	VIT_00s0510g00050	VIT_04s0023g02430	VIT_00s0583g00040	VIT_08s0007g02350	VIT_00s0414g00020	VIT_09s0002g04120	VIT_04s0008g00130	VIT_10s0116g00160	VIT_00s1212g00020	VIT_13s0019g00590	VIT_13s0067g02300	VIT_11s0103g00380	VIT_18s0001g12840	VIT_08s0040g01510			VIT_08s0032g00240
VIT_13s0139g00110	VIT_00s1241g00010	VIT_08s0007g02290	VIT_07s0151g00410			VIT_02s0025g04340	VIT_04s0008g05510	VIT_04s0023g00730	VIT_13s0084g00660	VIT_17s0000g06230	VIT_06s0004g05880	VIT_00s0469g00050	VIT_18s0001g05250	VIT_19s0014g04650	VIT_11s0016g01460	VIT_18s0001g00400	VIT_18s0001g02570	VIT_06s0004g04480	VIT_03s0088g01050	VIT_18s0122g00980	VIT_14s0068g00140			VIT_15s0048g01530
VIT_07s0005g00890	VIT_08s0007g00410	VIT_01s0010g01660	VIT_09s0002g04780			VIT_03s0091g00160	VIT_06s0004g04910	VIT_04s0008g03010	VIT_00s1665g00010	VIT_05s0029g00650	VIT_01s0137g00460	VIT_00s0414g00030	VIT_14s0108g00740	VIT_12s0134g00240	VIT_13s0019g04420	VIT_18s0001g00080	VIT_04s0008g01430	VIT_08s0007g00140	VIT_12s0059g00590	VIT_01s0011g00160	VIT_05s0029g00120			VIT_08s0007g05360
VIT_03s0063g02250	VIT_01s0010g00410	VIT_18s0001g08230	VIT_19s0085g00740			VIT_03s0063g02120	VIT_01s0137g00780	VIT_02s0012g00880	VIT_07s0151g00280	VIT_05s0049g01160	VIT_08s0040g01470	VIT_00s0414g00060	VIT_07s0005g01500	VIT_18s0001g03620	VIT_18s0001g01590	VIT_18s0075g00670	VIT_06s0061g01560	VIT_08s0007g05530	VIT_05s0020g01120	VIT_19s0090g01070	VIT_02s0033g00310			VIT_04s0210g00050
VIT_05s0102g00480	VIT_15s0048g02300	VIT_18s0001g08100	VIT_04s0008g02860			VIT_11s0016g03240	VIT_04s0008g06060	VIT_02s0025g05100	VIT_06s0004g06960	VIT_08s0007g04790	VIT_01s0011g06190	VIT_00s0469g00020	VIT_01s0011g05560	VIT_14s0083g01140	VIT_13s0067g01530	VIT_18s0001g00790	VIT_08s0040g01230	VIT_10s0003g00390	VIT_03s0063g01790	VIT_06s0061g00100	VIT_08s0040g00030			VIT_02s0087g00930
VIT_03s0091g00450	VIT_12s0028g03050	VIT_19s0085g01000	VIT_18s0072g01220			VIT_11s0016g04720	VIT_04s0008g00860	VIT_03s0038g04110	VIT_10s0003g04270	VIT_08s0040g00380	VIT_07s0104g00930	VIT_05s0049g00010	VIT_18s0001g05680	VIT_17s0000g05680	VIT_04s0008g03940	VIT_18s0075g00580	VIT_10s0116g00190	VIT_12s0057g00170	VIT_10s0116g01040	VIT_13s0019g01180	VIT_02s0012g01380			VIT_18s0075g00620
VIT_18s0001g14690	VIT_02s0025g02710	VIT_07s0129g00400	VIT_00s0317g00140			VIT_09s0002g03130	VIT_18s0122g00830	VIT_17s0000g09150	VIT_01s0011g05190	VIT_02s0025g04320	VIT_19s0014g01420	VIT_02s0025g01950	VIT_07s0191g00090	VIT_16s0022g01690	VIT_04s0008g05210	VIT_13s0019g01930	VIT_12s0059g01190	VIT_18s0001g03620	VIT_06s0004g07010	VIT_12s0055g00200	VIT_15s0021g00320			VIT_18s0075g01090
VIT_07s0129g00970	VIT_12s0028g03350	VIT_10s0003g01980	VIT_09s0002g05940			VIT_06s0004g03920	VIT_18s0001g09290	VIT_05s0077g00950	VIT_01s0011g05150	VIT_14s0060g01320	VIT_07s0104g00350	VIT_02s0025g01900	VIT_16s0100g00620	VIT_01s0026g01640	VIT_05s0020g01090	VIT_18s0001g01010	VIT_02s0012g00830	VIT_03s0063g02120	VIT_15s0021g00370	VIT_14s0006g00520	VIT_14s0068g02050			VIT_18s0122g00520
VIT_10s0116g00440	VIT_08s0058g01390	VIT_19s0014g00710	VIT_08s0217g00090			VIT_13s0067g00490	VIT_09s0002g06810	VIT_12s0035g00760	VIT_07s0005g00390	VIT_07s0005g01350	VIT_11s0016g03740	VIT_02s0025g01920	VIT_02s0025g04120	VIT_05s0124g00240	VIT_12s0035g00620	VIT_18s0075g00810	VIT_08s0040g01810	VIT_13s0067g00260	VIT_13s0019g00740	VIT_17s0000g05030	VIT_08s0040g00170			VIT_08s0007g01550
VIT_01s0011g03400	VIT_00s0349g00040	VIT_10s0003g01900	VIT_10s0003g00260			VIT_03s0038g03220	VIT_16s0050g00710	VIT_01s0011g04490	VIT_01s0026g01240	VIT_02s0012g00150	VIT_02s0012g02570	VIT_02s0025g01860	VIT_13s0019g01830	VIT_09s0002g02700	VIT_02s0012g02250	VIT_19s0090g01420	VIT_09s0002g08940	VIT_17s0000g06040	VIT_02s0025g00350	VIT_12s0059g01320	VIT_18s0001g05100			VIT_18s0117g00600
VIT_14s0066g02020	VIT_01s0011g00080	VIT_15s0048g02630	VIT_01s0011g00410			VIT_16s0050g02560	VIT_05s0051g00680	VIT_19s0090g00480	VIT_16s0050g02460	VIT_07s0005g00980	VIT_12s0059g02280	VIT_04s0008g05610	VIT_09s0002g03410	VIT_17s0000g08150	VIT_18s0001g08710	VIT_18s0075g00590	VIT_17s0000g00320	VIT_04s0023g01320	VIT_15s0046g02230	VIT_14s0060g00440	VIT_15s0024g01170			VIT_18s0075g00670
VIT_10s0003g02840	VIT_03s0038g02170	VIT_13s0158g00370	VIT_15s0046g01920			VIT_02s0025g04520	VIT_11s0016g02980	VIT_07s0031g01480	VIT_09s0054g01230	VIT_18s0001g05800	VIT_02s0025g04060	VIT_12s0057g00750	VIT_15s0048g02410	VIT_05s0029g00390	VIT_19s0090g01610	VIT_18s0001g01460	VIT_17s0000g06360	VIT_06s0080g00450	VIT_02s0025g02630	VIT_04s0079g00230	VIT_18s0001g14260			VIT_18s0075g00630
VIT_17s0000g09490	VIT_03s0063g02340	VIT_07s0104g01150	VIT_09s0002g01000			VIT_04s0069g00790	VIT_04s0023g01150	VIT_01s0026g02720	VIT_09s0054g01330	VIT_13s0067g02300	VIT_07s0005g00340	VIT_05s0077g02150	VIT_01s0011g05230	VIT_12s0028g03550	VIT_14s0068g00750	VIT_08s0007g00950	VIT_04s0023g01630	VIT_05s0102g00450	VIT_16s0100g00360	VIT_17s0053g00700	VIT_18s0041g00070			VIT_18s0075g00540
VIT_15s0024g00440	VIT_10s0116g00940	VIT_18s0041g01750	VIT_17s0000g09740			VIT_18s0001g11250	VIT_08s0007g03370	VIT_09s0002g05710	VIT_09s0054g01470	VIT_08s0007g00140	VIT_11s0016g03830	VIT_01s0011g06440	VIT_04s0008g06630	VIT_14s0108g00480	VIT_05s0094g00500	VIT_17s0000g00640	VIT_16s0098g00900	VIT_08s0032g01220	VIT_18s0001g15220	VIT_05s0020g01910	VIT_15s0048g02710			VIT_13s0067g01970
VIT_13s0067g00790	VIT_05s0020g01750	VIT_09s0002g05070	VIT_12s0059g02530			VIT_13s0064g00410	VIT_08s0007g04030	VIT_14s0060g00550	VIT_09s0054g01520	VIT_08s0058g00800	VIT_18s0072g00990	VIT_13s0067g02870	VIT_07s0104g01440	VIT_11s0052g00100	VIT_09s0054g01700	VIT_00s0375g00050	VIT_06s0004g06950	VIT_02s0025g04520	VIT_18s0001g08690	VIT_17s0119g00280	VIT_13s0156g00300			VIT_00s0407g00050
VIT_17s0000g08370	VIT_04s0008g02070	VIT_09s0002g00810	VIT_06s0004g04360			VIT_09s0002g06260	VIT_18s0001g06070	VIT_01s0127g00260	VIT_02s0025g00240	VIT_04s0023g01320	VIT_14s0108g00340	VIT_13s0067g03820	VIT_06s0004g03930	VIT_00s1665g00010	VIT_18s0072g00920	VIT_08s0007g08020	VIT_07s0129g00260	VIT_01s0010g00380	VIT_13s0156g00220	VIT_00s0270g00120	VIT_08s0056g01600			VIT_16s0098g00600
VIT_16s0050g01690	VIT_14s0068g00740	VIT_13s0019g04610	VIT_09s0002g00570			VIT_11s0118g00180	VIT_02s0025g01720	VIT_19s0014g00020	VIT_03s0038g00150	VIT_04s0008g06210	VIT_10s0003g01410	VIT_05s0094g00200	VIT_08s0007g07930	VIT_16s0100g00470	VIT_08s0007g04520	VIT_03s0017g00250	VIT_13s0067g01960	VIT_05s0029g00750	VIT_04s0008g03940	VIT_17s0119g00120	VIT_17s0000g03720			VIT_02s0033g01390
VIT_17s0000g08760	VIT_18s0001g14500	VIT_14s0081g00620	VIT_16s0100g00360			VIT_07s0191g00180	VIT_16s0100g00330	VIT_13s0074g00510	VIT_13s0073g00530	VIT_09s0002g08650	VIT_16s0050g00850	VIT_05s0094g00360	VIT_09s0018g01210	VIT_10s0003g04270	VIT_01s0010g03510	VIT_18s0001g06400	VIT_18s0001g05250	VIT_18s0041g01330	VIT_15s0021g00890	VIT_17s0119g00150	VIT_07s0197g00040			VIT_17s0000g00640
VIT_16s0050g02430	VIT_18s0001g03080	VIT_13s0019g01220	VIT_07s0129g00470			VIT_08s0058g00470	VIT_11s0016g01810	VIT_10s0003g04000	VIT_04s0023g02690	VIT_19s0014g01180	VIT_14s0066g00370	VIT_04s0008g00120	VIT_16s0100g00710	VIT_08s0056g01160	VIT_01s0010g03490	VIT_14s0083g00250	VIT_08s0007g05860	VIT_15s0024g00400	VIT_04s0043g00840	VIT_19s0014g00980	VIT_18s0001g13730			VIT_08s0007g08020
VIT_16s0098g00160	VIT_05s0062g00400	VIT_03s0038g04470	VIT_01s0011g04620			VIT_11s0016g04750	VIT_14s0030g00190	VIT_08s0040g02300	VIT_18s0001g13230	VIT_17s0000g06040	VIT_08s0007g04350	VIT_05s0094g00320	VIT_06s0004g00220	VIT_17s0000g03580	VIT_19s0015g01320	VIT_08s0007g07330	VIT_17s0000g07770	VIT_05s0029g00870	VIT_16s0050g02290	VIT_07s0005g00630	VIT_14s0030g02230			VIT_03s0017g00250
VIT_00s0203g00050	VIT_08s0007g08470	VIT_13s0019g04040	VIT_00s0317g00060			VIT_02s0033g01380	VIT_03s0063g02360	VIT_02s0025g03790	VIT_00s0340g00040	VIT_12s0028g01370	VIT_11s0016g00200	VIT_05s0094g00330	VIT_15s0046g01550	VIT_02s0025g00200	VIT_06s0004g06570	VIT_06s0004g00440	VIT_01s0011g05560	VIT_18s0041g01340	VIT_18s0001g11950	VIT_08s0040g03040	VIT_15s0021g02690			VIT_14s0081g00190
VIT_07s0005g00770	VIT_10s0003g04320	VIT_14s0068g01300	VIT_06s0004g08440			VIT_03s0038g02650	VIT_02s0012g01260	VIT_06s0009g01750	VIT_14s0066g02410	VIT_19s0014g00450	VIT_01s0127g00230	VIT_11s0118g00220	VIT_06s0004g01780	VIT_01s0011g05190	VIT_00s0516g00020	VIT_15s0024g00550	VIT_02s0012g01320	VIT_00s0487g00050	VIT_11s0118g00650	VIT_07s0104g01800	VIT_07s0141g00220			VIT_15s0024g00550
VIT_18s0001g08100	VIT_01s0146g00180	VIT_14s0030g01660	VIT_15s0021g02460			VIT_07s0031g01980	VIT_08s0007g06710	VIT_13s0067g01900	VIT_07s0141g00060	VIT_13s0175g00080	VIT_13s0019g02300	VIT_03s0038g04260	VIT_12s0035g00070	VIT_01s0011g05100	VIT_19s0014g03970	VIT_10s0003g03810	VIT_15s0046g00320	VIT_18s0001g06240	VIT_11s0149g00060	VIT_05s0049g01070	VIT_19s0014g04670			VIT_17s0000g09800
VIT_08s0007g04180	VIT_09s0002g05150	VIT_00s0286g00140	VIT_01s0011g03120			VIT_12s0059g01870	VIT_13s0067g02560	VIT_14s0060g02000	VIT_13s0019g00040	VIT_11s0016g05740	VIT_08s0058g00280	VIT_04s0008g07080	VIT_05s0020g04570	VIT_12s0057g00990	VIT_08s0032g00780	VIT_05s0077g01460	VIT_07s0031g03040	VIT_18s0001g06340	VIT_18s0001g07600	VIT_08s0007g01410	VIT_17s0000g00330			VIT_05s0049g00520
VIT_05s0062g00830	VIT_19s0014g04660	VIT_05s0077g00550	VIT_01s0150g00330			VIT_18s0001g02570	VIT_06s0004g02290	VIT_14s0060g02020	VIT_12s0035g00990	VIT_03s0038g03220	VIT_16s0098g00720	VIT_11s0078g00290	VIT_04s0008g05770	VIT_08s0007g06060	VIT_06s0004g03900	VIT_12s0057g00060	VIT_14s0108g01550	VIT_11s0118g00180	VIT_07s0031g01560	VIT_08s0007g01400	VIT_18s0076g00330			VIT_00s1466g00010
VIT_06s0004g05180	VIT_15s0046g00730	VIT_19s0014g04600	VIT_05s0049g01850			VIT_14s0068g00500	VIT_14s0083g00410	VIT_09s0002g00430	VIT_13s0106g00740	VIT_05s0102g00450	VIT_00s0445g00010	VIT_18s0122g00620	VIT_04s0044g01560	VIT_08s0007g05990	VIT_06s0004g01270	VIT_00s1466g00010	VIT_02s0025g01130	VIT_03s0132g00070	VIT_10s0116g00350	VIT_14s0060g02170	VIT_13s0158g00380			VIT_01s0011g01350
VIT_17s0000g03690	VIT_12s0057g00420	VIT_04s0008g06890	VIT_14s0083g00980			VIT_04s0044g01850	VIT_07s0005g01320	VIT_03s0038g03110	VIT_07s0141g00620	VIT_00s0231g00040	VIT_15s0046g01810	VIT_18s0122g00640	VIT_01s0150g00020	VIT_07s0005g00390	VIT_02s0241g00140	VIT_09s0054g00570	VIT_01s0011g05230	VIT_07s0197g00080	VIT_16s0022g01870	VIT_01s0026g02400	VIT_04s0008g05210			VIT_15s0048g02640
VIT_07s0005g00710	VIT_08s0007g00440	VIT_16s0098g01870	VIT_19s0090g00360			VIT_08s0007g02030	VIT_00s0291g00050	VIT_17s0000g03600	VIT_10s0003g01480	VIT_11s0052g00200	VIT_04s0023g00690	VIT_18s0122g00630	VIT_10s0003g01980	VIT_14s0108g00890	VIT_18s0001g13870	VIT_14s0083g00260	VIT_02s0025g04060	VIT_02s0033g01380	VIT_18s0001g09130	VIT_08s0040g00920	VIT_14s0108g00980			VIT_13s0019g03930
VIT_19s0014g00830	VIT_10s0405g00040	VIT_14s0068g01780	VIT_02s0025g02620			VIT_04s0044g01620	VIT_13s0067g00700	VIT_09s0002g01390	VIT_08s0007g07490	VIT_18s0041g00270	VIT_16s0050g02680	VIT_02s0012g01570	VIT_09s0002g09090	VIT_06s0061g00120	VIT_11s0016g03030	VIT_13s0106g00690	VIT_01s0011g03800	VIT_03s0038g03960	VIT_13s0067g03180	VIT_00s0153g00050	VIT_17s0000g04850			VIT_09s0054g00570
VIT_02s0025g02070	VIT_09s0002g08510	VIT_19s0014g02350	VIT_16s0050g00160			VIT_10s0003g04100	VIT_17s0000g08380	VIT_18s0001g12100	VIT_17s0000g07470	VIT_09s0002g07890	VIT_00s1328g00020	VIT_14s0066g01150	VIT_07s0031g00530	VIT_05s0077g00280	VIT_13s0019g01830	VIT_03s0063g01760	VIT_01s0146g00340	VIT_01s0026g02190	VIT_02s0025g02620	VIT_19s0015g02730	VIT_01s0011g06200			VIT_08s0032g01000
VIT_19s0093g00510	VIT_14s0006g02970	VIT_04s0044g00680	VIT_06s0004g03310			VIT_06s0004g00070	VIT_07s0151g00800	VIT_04s0044g01870	VIT_09s0002g06810	VIT_00s0487g00050	VIT_13s0084g00090	VIT_06s0004g02380	VIT_07s0005g00110	VIT_12s0059g02670	VIT_00s1404g00010	VIT_00s0203g00020	VIT_02s0025g03410	VIT_03s0091g00310	VIT_02s0025g01090	VIT_00s0240g00050	VIT_08s0007g06400			VIT_15s0046g01360
VIT_18s0001g09230	VIT_18s0001g02540	VIT_19s0014g03130	VIT_09s0002g02620			VIT_11s0016g00640	VIT_05s0020g02270	VIT_04s0044g01860	VIT_18s0001g02830	VIT_07s0197g00090	VIT_01s0026g00360	VIT_06s0004g02370	VIT_05s0029g01430	VIT_09s0054g01280	VIT_02s0025g02690	VIT_08s0007g05630	VIT_04s0008g00420	VIT_17s0000g09640	VIT_01s0137g00780	VIT_07s0005g04890	VIT_11s0016g02790			VIT_05s0049g00790
VIT_02s0025g04660	VIT_18s0001g09920	VIT_08s0007g05360	VIT_18s0001g12490			VIT_11s0016g04810	VIT_13s0067g02710	VIT_04s0044g01880	VIT_03s0038g00050	VIT_18s0089g00100	VIT_16s0039g00720	VIT_13s0064g00270	VIT_04s0044g01970	VIT_09s0054g01340	VIT_14s0108g01550	VIT_05s0049g00720	VIT_05s0062g01100	VIT_06s0004g00070	VIT_14s0060g01820	VIT_17s0000g02950	VIT_13s0064g00860			VIT_11s0016g05830
VIT_19s0015g00130	VIT_18s0001g05250	VIT_05s0020g02020	VIT_04s0023g01150			VIT_09s0002g02080	VIT_01s0011g03420	VIT_18s0089g00910	VIT_18s0001g11180	VIT_18s0001g06110	VIT_11s0016g05330	VIT_02s0025g03100	VIT_06s0004g04700	VIT_09s0054g01520	VIT_16s0098g01070	VIT_08s0058g00550	VIT_10s0003g05210	VIT_03s0038g03430	VIT_09s0002g06810	VIT_07s0104g01830	VIT_09s0002g01590			VIT_03s0063g01760
VIT_06s0009g03740	VIT_14s0108g00740	VIT_17s0000g06370	VIT_02s0025g04570			VIT_04s0023g01250	VIT_10s0116g01550	VIT_17s0000g02750	VIT_03s0038g00840	VIT_18s0041g01620	VIT_05s0062g00910	VIT_03s0110g00310	VIT_03s0038g03540	VIT_06s0061g01520	VIT_15s0048g02680	VIT_03s0110g00430	VIT_11s0016g01800	VIT_04s0023g00580	VIT_03s0091g00850	VIT_19s0015g02890	VIT_00s0259g00180			VIT_05s0049g00720
VIT_12s0028g01390	VIT_03s0063g00880	VIT_18s0001g10510	VIT_18s0001g05020			VIT_18s0001g13200	VIT_19s0014g03670	VIT_11s0016g01190	VIT_17s0000g01780	VIT_18s0001g11250	VIT_08s0058g01210	VIT_15s0107g00210	VIT_08s0105g00250	VIT_05s0077g00510	VIT_04s0008g01080	VIT_12s0059g01050	VIT_11s0016g03080	VIT_04s0023g00560	VIT_03s0063g02520	VIT_19s0093g00320	VIT_19s0015g00440			VIT_10s0116g01840
VIT_02s0033g01370	VIT_19s0014g01690	VIT_00s0181g00040	VIT_02s0012g01260			VIT_18s0001g05950	VIT_08s0040g02380	VIT_14s0030g01980	VIT_19s0014g00900	VIT_13s0064g00410	VIT_15s0048g00630	VIT_00s0615g00020	VIT_07s0104g00100	VIT_09s0002g02120	VIT_09s0002g01680	VIT_10s0116g01840	VIT_12s0028g03060	VIT_09s0002g00700	VIT_00s0338g00030	VIT_03s0038g00220	VIT_11s0016g01480			VIT_03s0017g00180
VIT_16s0098g01780	VIT_16s0098g01790	VIT_18s0072g00460	VIT_08s0007g06710			VIT_06s0004g05120		VIT_03s0038g03520	VIT_08s0058g00500	VIT_13s0139g00220	VIT_17s0000g02200	VIT_19s0014g04980	VIT_13s0019g00500	VIT_00s0340g00040	VIT_14s0060g01290	VIT_03s0017g00180	VIT_12s0034g02220	VIT_18s0089g00510	VIT_04s0044g00610	VIT_03s0038g00250	VIT_08s0032g01190			VIT_07s0031g01260
VIT_19s0140g00210	VIT_17s0000g05840	VIT_18s0001g06270	VIT_12s0059g01900			VIT_12s0057g00690		VIT_15s0048g00530	VIT_11s0016g05460	VIT_11s0118g00180	VIT_02s0012g01050	VIT_13s0067g00680	VIT_13s0106g00610	VIT_17s0000g07670	VIT_06s0004g03360	VIT_02s0012g01370	VIT_13s0073g00600	VIT_04s0008g01880	VIT_11s0078g00260	VIT_01s0011g06290	VIT_00s1287g00010			VIT_07s0141g00120
VIT_16s0050g02670	VIT_04s0023g00830	VIT_04s0043g00570	VIT_01s0137g00390			VIT_18s0001g08610		VIT_11s0016g00520	VIT_04s0008g05240	VIT_08s0058g00470	VIT_08s0032g00790	VIT_17s0000g07030	VIT_13s0064g00940	VIT_03s0063g02640	VIT_16s0039g01580	VIT_03s0091g00420	VIT_16s0100g00710	VIT_18s0001g05950	VIT_18s0001g06070	VIT_03s0063g01970	VIT_12s0057g01010			VIT_03s0110g00290
VIT_06s0004g01380	VIT_05s0062g00780	VIT_07s0031g00590	VIT_11s0016g04330			VIT_13s0019g03550		VIT_18s0001g04150	VIT_01s0011g06410	VIT_18s0001g06390	VIT_07s0031g02550	VIT_03s0017g01040	VIT_08s0007g01310	VIT_05s0020g04540	VIT_02s0025g02430	VIT_07s0031g01260	VIT_19s0014g04470	VIT_05s0077g01480	VIT_10s0092g00640	VIT_08s0058g00410	VIT_11s0103g00760			VIT_18s0001g09680
VIT_08s0007g03860	VIT_12s0028g02650	VIT_12s0028g02000	VIT_13s0019g00120			VIT_07s0031g00220		VIT_04s0008g02070	VIT_02s0025g03510	VIT_06s0061g00700	VIT_08s0007g02160	VIT_13s0019g03100	VIT_05s0020g03930	VIT_11s0016g04700	VIT_08s0007g03240	VIT_03s0063g02330	VIT_19s0014g04540	VIT_01s0026g00940	VIT_02s0012g01260	VIT_13s0064g01470	VIT_16s0098g00360			VIT_06s0009g03390
VIT_15s0024g00820	VIT_15s0048g03000	VIT_08s0007g00890	VIT_18s0001g03610			VIT_01s0011g03070		VIT_15s0045g01200	VIT_03s0038g00160	VIT_09s0002g00650	VIT_04s0008g01780	VIT_12s0142g00610	VIT_07s0031g00940	VIT_04s0023g01920	VIT_03s0063g00800	VIT_08s0007g08040	VIT_16s0050g02680	VIT_13s0067g03070	VIT_05s0094g01540	VIT_12s0059g02150	VIT_04s0069g01020			VIT_03s0038g00130
VIT_07s0005g02020	VIT_07s0104g01440	VIT_00s0265g00070	VIT_11s0016g02520			VIT_10s0003g00580		VIT_01s0011g06140	VIT_03s0097g00570	VIT_18s0001g13200	VIT_05s0020g04130	VIT_04s0008g00440	VIT_07s0104g01120	VIT_06s0080g00280	VIT_03s0063g00810	VIT_08s0007g08030	VIT_01s0127g00060	VIT_06s0004g03540	VIT_08s0007g06710	VIT_01s0127g00260	VIT_18s0001g11390			VIT_17s0000g03160
VIT_13s0019g00010	VIT_10s0003g05480	VIT_17s0000g07070	VIT_00s0264g00050			VIT_03s0091g00390		VIT_09s0002g00220	VIT_00s0415g00050	VIT_03s0017g01040	VIT_17s0000g09740	VIT_11s0016g03080	VIT_06s0004g00880	VIT_07s0141g00620	VIT_03s0063g00770	VIT_16s0100g01220	VIT_05s0062g00900	VIT_16s0013g00890	VIT_13s0067g02560	VIT_00s1995g00010	VIT_07s0197g00060			VIT_18s0001g12710
VIT_09s0002g05660	VIT_17s0000g05570	VIT_17s0000g07090	VIT_00s0194g00330			VIT_17s0000g06210		VIT_18s0001g03620	VIT_11s0016g01460	VIT_18s0001g05950	VIT_01s0010g03600	VIT_18s0117g00300	VIT_13s0019g02690	VIT_08s0058g00750	VIT_03s0063g00830	VIT_04s0008g00700	VIT_06s0004g07730	VIT_04s0008g06000	VIT_17s0000g08580	VIT_00s2576g00010	VIT_19s0090g01740			VIT_15s0048g00740
VIT_05s0020g02020	VIT_13s0073g00600	VIT_14s0108g01620	VIT_13s0064g00900			VIT_14s0066g01790		VIT_13s0067g01270	VIT_06s0009g00260	VIT_18s0001g07690	VIT_14s0171g00430	VIT_03s0167g00050	VIT_11s0016g03160	VIT_13s0019g01030	VIT_03s0063g00750	VIT_03s0110g00290	VIT_10s0003g00790	VIT_01s0011g03070	VIT_09s0002g08540	VIT_00s0301g00090	VIT_15s0048g00870			VIT_09s0002g02950
VIT_08s0032g01150	VIT_06s0004g07030	VIT_12s0059g01980	VIT_06s0004g04910			VIT_09s0002g00890		VIT_14s0171g00150	VIT_17s0000g09790	VIT_14s0081g00630	VIT_12s0059g02520	VIT_07s0104g01360	VIT_14s0066g02320	VIT_06s0004g06290	VIT_13s0106g00250	VIT_06s0009g03390	VIT_03s0038g04210	VIT_16s0100g00380	VIT_14s0060g01810	VIT_14s0060g01280	VIT_08s0105g00230			VIT_19s0015g00490
VIT_15s0048g00790	VIT_01s0026g00580	VIT_05s0020g01080	VIT_18s0001g05640			VIT_04s0023g03600		VIT_01s0010g02450	VIT_15s0046g01510	VIT_05s0049g00090	VIT_17s0000g10060	VIT_01s0011g03520	VIT_05s0020g00890	VIT_09s0018g01660	VIT_06s0004g00410	VIT_18s0122g00810	VIT_03s0038g02290	VIT_18s0001g06030	VIT_07s0005g02450	VIT_09s0002g00810	VIT_16s0098g01170			VIT_05s0049g00660
VIT_11s0037g00850	VIT_10s0003g04990	VIT_12s0057g00190	VIT_18s0001g03860			VIT_01s0011g05560		VIT_09s0002g01630	VIT_19s0015g01430	VIT_04s0008g01330	VIT_03s0180g00070	VIT_14s0030g00600	VIT_01s0127g00440	VIT_02s0025g00180	VIT_15s0046g01290	VIT_07s0005g01130	VIT_05s0062g01130	VIT_03s0091g00390	VIT_15s0048g01050	VIT_02s0012g00760	VIT_18s0001g11800			VIT_12s0028g03120
VIT_11s0037g00840	VIT_16s0022g01620	VIT_08s0007g02990	VIT_14s0030g01420			VIT_13s0064g00890		VIT_13s0074g00110	VIT_14s0083g00700	VIT_08s0040g02360	VIT_12s0057g01440	VIT_14s0030g00570	VIT_04s0008g05020	VIT_08s0105g00230	VIT_08s0007g00030	VIT_08s0007g08010	VIT_18s0001g08270	VIT_17s0000g07770	VIT_07s0005g00450	VIT_10s0003g04880	VIT_15s0021g01880			VIT_05s0049g00840
VIT_19s0014g05090	VIT_17s0053g00590	VIT_16s0039g02820	VIT_18s0001g08770			VIT_05s0020g04420		VIT_05s0124g00240	VIT_01s0010g00930	VIT_13s0019g03890	VIT_01s0146g00520	VIT_05s0020g03280	VIT_13s0019g02280	VIT_07s0005g04330	VIT_10s0003g01410	VIT_12s0134g00170	VIT_09s0002g05710	VIT_18s0001g09460	VIT_08s0007g05040	VIT_11s0037g00290	VIT_01s0127g00210			VIT_00s0187g00010
VIT_15s0048g02500	VIT_02s0241g00120	VIT_01s0010g03880	VIT_15s0046g00990			VIT_11s0206g00070		VIT_03s0038g01790	VIT_00s0541g00020	VIT_16s0050g00620	VIT_17s0000g06290	VIT_02s0025g04560	VIT_00s0259g00160	VIT_11s0016g04720	VIT_05s0020g04570	VIT_09s0002g02950	VIT_08s0007g02240	VIT_17s0000g06210	VIT_08s0040g00160	VIT_11s0016g05530	VIT_10s0003g04040			VIT_12s0059g00440
VIT_06s0004g06170	VIT_06s0009g01640	VIT_14s0219g00110	VIT_10s0116g01820			VIT_05s0020g03980		VIT_12s0028g02350	VIT_04s0008g02750	VIT_05s0020g03980	VIT_12s0142g00070	VIT_03s0110g00370	VIT_04s0023g00790	VIT_15s0048g02070	VIT_07s0005g03680	VIT_18s0001g08590	VIT_11s0118g00220	VIT_11s0016g00710	VIT_19s0015g00160	VIT_09s0002g01320	VIT_14s0219g00050			VIT_01s0011g01810
VIT_00s0181g00040	VIT_08s0058g00540	VIT_08s0007g03840	VIT_02s0154g00040			VIT_16s0098g01790		VIT_10s0003g01160	VIT_14s0068g00750	VIT_12s0059g00520	VIT_11s0016g01130	VIT_04s0008g01960	VIT_06s0004g00620	VIT_17s0000g08530	VIT_17s0000g08890	VIT_14s0081g00540	VIT_16s0039g00700	VIT_09s0002g00890	VIT_09s0054g01750	VIT_07s0031g03220	VIT_00s1241g00010			VIT_17s0000g00680
VIT_18s0001g02050	VIT_08s0007g03600	VIT_08s0007g01360	VIT_01s0010g03800			VIT_13s0019g03890		VIT_01s0244g00010	VIT_05s0020g00410	VIT_00s0207g00230	VIT_09s0002g05730	VIT_01s0011g01360	VIT_03s0063g02610	VIT_05s0020g00440	VIT_00s0616g00030	VIT_05s0049g00660	VIT_15s0048g01060	VIT_01s0146g00480	VIT_07s0104g00590	VIT_14s0060g02760	VIT_17s0000g01890			VIT_05s0049g00770
VIT_19s0014g01870	VIT_06s0009g03420	VIT_02s0025g01090	VIT_02s0025g01720			VIT_08s0040g02360		VIT_10s0003g01170	VIT_15s0046g01550	VIT_01s0137g00820	VIT_13s0019g02110	VIT_12s0059g02540	VIT_00s0216g00060	VIT_09s0002g05810	VIT_15s0107g00320	VIT_05s0077g00540	VIT_10s0116g00760	VIT_01s0011g05560	VIT_07s0005g01180	VIT_14s0128g00650	VIT_17s0000g06190			VIT_06s0009g01410
VIT_04s0023g03350	VIT_01s0010g02430	VIT_04s0044g00610	VIT_05s0020g02830			VIT_16s0050g00620		VIT_07s0151g00450	VIT_16s0050g00850	VIT_12s0134g00010	VIT_17s0000g06650	VIT_18s0001g06320	VIT_13s0067g03600	VIT_15s0046g02020	VIT_13s0019g01840	VIT_05s0049g00750	VIT_05s0049g02310	VIT_17s0000g03380	VIT_02s0025g01710	VIT_14s0128g00610	VIT_06s0004g04140			VIT_00s0199g00010
VIT_01s0011g05960	VIT_07s0031g00490	VIT_11s0016g05430	VIT_14s0083g00410			VIT_05s0020g03380		VIT_02s0025g02610	VIT_15s0024g00240	VIT_00s0484g00030	VIT_03s0063g01790	VIT_19s0014g01360	VIT_11s0103g00380	VIT_18s0001g08430	VIT_02s0025g04680	VIT_19s0090g01360	VIT_19s0085g00920	VIT_17s0000g04460	VIT_18s0001g13210	VIT_12s0034g01930	VIT_08s0007g01540			VIT_14s0066g00680
VIT_11s0118g00570	VIT_01s0011g03910	VIT_08s0007g02600	VIT_03s0063g01910			VIT_09s0002g03410		VIT_11s0016g02070	VIT_13s0067g02160	VIT_14s0006g01080	VIT_08s0007g08280	VIT_18s0122g01210	VIT_15s0021g00520	VIT_12s0055g01150	VIT_06s0004g06300	VIT_03s0091g01040	VIT_08s0058g01070	VIT_11s0016g01970	VIT_14s0066g01870	VIT_14s0128g00660	VIT_16s0050g01180			VIT_06s0004g03350
VIT_12s0034g00040	VIT_08s0007g06510	VIT_10s0116g00370	VIT_13s0067g02710			VIT_00s0207g00230		VIT_05s0049g00460	VIT_11s0052g00320	VIT_12s0057g00470	VIT_00s0317g00060	VIT_01s0026g01190	VIT_12s0059g00590	VIT_02s0025g03510	VIT_15s0021g01380	VIT_09s0002g04410	VIT_14s0006g02720	VIT_05s0020g04420	VIT_16s0050g01060	VIT_14s0128g00620	VIT_17s0000g00990			VIT_03s0088g01240
VIT_12s0055g00200	VIT_07s0005g00110	VIT_00s0360g00010				VIT_17s0000g02010		VIT_12s0059g00810	VIT_12s0059g01790	VIT_04s0008g00310	VIT_05s0020g02650	VIT_03s0063g00700	VIT_02s0025g03580	VIT_03s0097g00570	VIT_12s0142g00280	VIT_17s0000g09050	VIT_00s0218g00100	VIT_00s2785g00010	VIT_11s0052g00470	VIT_18s0041g02060	VIT_13s0019g03370			VIT_05s0029g00390
VIT_03s0063g00050	VIT_07s0031g00540	VIT_07s0031g01910				VIT_06s0004g06430		VIT_00s0274g00080	VIT_12s0059g01750	VIT_04s0008g00300	VIT_17s0000g02020	VIT_13s0084g00130	VIT_03s0063g01890	VIT_02s0033g00590	VIT_01s0010g01200	VIT_05s0049g00970	VIT_08s0007g00020	VIT_08s0007g03630	VIT_17s0000g03790	VIT_13s0064g01480	VIT_00s0375g00040			VIT_00s1314g00010
VIT_15s0021g02690	VIT_09s0002g00920	VIT_04s0008g00460				VIT_13s0067g02030		VIT_05s0077g01540	VIT_12s0028g03110	VIT_17s0000g08770	VIT_14s0068g01590	VIT_18s0001g07220	VIT_14s0066g01380	VIT_07s0129g00210	VIT_08s0007g08380	VIT_00s1522g00010	VIT_18s0001g06790	VIT_05s0020g04220	VIT_14s0108g01440	VIT_03s0063g01820	VIT_15s0048g02660			VIT_13s0064g01290
VIT_07s0005g00290	VIT_05s0094g01080	VIT_18s0001g12090				VIT_10s0003g04990		VIT_08s0007g06060	VIT_07s0031g00350	VIT_01s0127g00130	VIT_11s0118g00650	VIT_17s0000g01810	VIT_09s0002g06560	VIT_18s0122g01340	VIT_06s0061g01230	VIT_01s0011g01810	VIT_01s0026g01490	VIT_08s0007g05790	VIT_08s0105g00180	VIT_09s0002g01080	VIT_18s0001g10250			VIT_18s0001g08040
VIT_02s0025g01710	VIT_18s0001g05530	VIT_18s0001g05580				VIT_02s0025g03240		VIT_08s0007g06030	VIT_19s0090g00230	VIT_18s0001g12260	VIT_19s0014g05110	VIT_16s0013g00630	VIT_05s0020g02690	VIT_04s0008g05340	VIT_08s0007g03990	VIT_18s0001g12700	VIT_17s0000g05640	VIT_05s0020g03980	VIT_13s0064g00900	VIT_12s0059g01060	VIT_03s0038g00160			VIT_18s0001g06650
VIT_19s0014g01940	VIT_08s0007g04780	VIT_15s0046g03310				VIT_12s0134g00450		VIT_14s0108g00890	VIT_06s0004g01050	VIT_00s0294g00020	VIT_02s0012g02540	VIT_16s0050g00480	VIT_17s0000g01110	VIT_12s0028g02590	VIT_13s0074g00500	VIT_07s0151g00010	VIT_05s0077g00010	VIT_07s0129g00180	VIT_07s0005g01080	VIT_18s0041g02080	VIT_18s0072g00390			VIT_08s0007g06160
VIT_01s0011g04190	VIT_01s0026g02500	VIT_18s0001g11160				VIT_17s0000g08240		VIT_03s0091g00810	VIT_14s0066g01380	VIT_08s0007g01230	VIT_13s0074g00590	VIT_08s0032g00240	VIT_04s0008g07370	VIT_08s0040g00870	VIT_12s0059g00990	VIT_16s0050g00650	VIT_14s0108g01500	VIT_18s0001g11830	VIT_05s0020g01040	VIT_18s0041g02020	VIT_01s0011g05690			VIT_14s0006g02730
VIT_13s0019g02680	VIT_06s0004g02710	VIT_15s0046g01660				VIT_10s0003g01990		VIT_15s0046g02300	VIT_15s0048g02250	VIT_18s0086g00200	VIT_08s0007g08680	VIT_01s0137g00550	VIT_02s0025g00840	VIT_05s0077g01140	VIT_07s0005g01030	VIT_18s0001g06560	VIT_17s0000g00340	VIT_11s0206g00090	VIT_08s0007g03230	VIT_11s0016g04700	VIT_12s0057g01250			VIT_01s0137g00050
VIT_01s0011g04220	VIT_18s0001g03170	VIT_18s0001g04540				VIT_18s0001g10070		VIT_04s0044g00250	VIT_18s0001g13570	VIT_12s0142g00780	VIT_08s0007g01650	VIT_01s0137g00560	VIT_10s0003g05370	VIT_18s0122g00500	VIT_02s0025g01910	VIT_06s0061g01500	VIT_06s0004g08060	VIT_14s0006g01400	VIT_16s0050g00710	VIT_13s0067g01120	VIT_03s0091g00430			VIT_12s0028g00980
VIT_12s0057g00190	VIT_14s0030g00220	VIT_04s0008g05160				VIT_18s0041g01350		VIT_03s0038g01480	VIT_05s0049g02080	VIT_06s0004g08250	VIT_15s0021g02070	VIT_01s0137g00520	VIT_08s0007g08280	VIT_14s0030g02200	VIT_02s0025g01980	VIT_19s0014g02390	VIT_06s0061g00230	VIT_11s0206g00080	VIT_10s0116g01810	VIT_14s0066g01830	VIT_07s0129g00210			VIT_01s0026g01950
VIT_07s0151g00800	VIT_06s0004g05940	VIT_03s0063g00100				VIT_07s0005g02100		VIT_05s0077g00510	VIT_08s0007g02240	VIT_04s0023g01080	VIT_18s0001g07600	VIT_17s0000g09610	VIT_01s0011g04710	VIT_02s0025g01020	VIT_13s0067g03230	VIT_01s0011g02540	VIT_11s0016g03160	VIT_16s0050g00620	VIT_19s0090g01750	VIT_14s0066g01820	VIT_17s0000g09790			VIT_02s0012g01650
VIT_13s0158g00090	VIT_11s0016g03050	VIT_03s0038g01510				VIT_18s0001g10470		VIT_00s2527g00010	VIT_00s0516g00020	VIT_10s0003g01400	VIT_03s0063g00180	VIT_06s0004g06480	VIT_18s0001g08690	VIT_15s0046g01440	VIT_00s0313g00010	VIT_09s0002g04470	VIT_06s0061g00940	VIT_06s0004g06430	VIT_06s0004g06590	VIT_12s0057g00010	VIT_14s0083g00150			VIT_06s0061g00470
VIT_18s0001g08810	VIT_00s0483g00010	VIT_01s0026g01300				VIT_14s0006g01080		VIT_09s0002g02120	VIT_14s0006g01650	VIT_01s0010g01000	VIT_05s0020g00390	VIT_01s0137g00540	VIT_02s0236g00030	VIT_05s0102g01120	VIT_08s0007g01680	VIT_15s0048g02370	VIT_11s0016g05240	VIT_19s0014g03400	VIT_10s0116g01820	VIT_17s0000g07450	VIT_02s0025g04590			VIT_07s0141g00100
VIT_10s0003g00980	VIT_17s0000g05640	VIT_12s0057g00220				VIT_18s0001g14610		VIT_11s0016g02200	VIT_15s0021g01690	VIT_14s0083g00620	VIT_02s0025g02640	VIT_19s0015g02500	VIT_14s0006g00910	VIT_05s0020g00410	VIT_04s0008g01290	VIT_03s0091g00670	VIT_06s0009g03550	VIT_05s0020g01400	VIT_00s0160g00220	VIT_04s0008g06620	VIT_15s0046g01510			VIT_04s0008g00620
VIT_19s0090g00130	VIT_05s0020g03930	VIT_19s0014g03470				VIT_12s0028g01350		VIT_14s0083g00340	VIT_08s0056g00290	VIT_19s0014g01530	VIT_05s0020g02570	VIT_18s0001g12170	VIT_18s0122g00290	VIT_01s0010g01430	VIT_16s0022g02190	VIT_06s0004g07200	VIT_08s0007g00930	VIT_06s0004g02530	VIT_06s0004g02790	VIT_02s0025g04620	VIT_00s0204g00020			VIT_18s0001g08470
VIT_19s0090g00100	VIT_13s0019g03650	VIT_18s0001g07290				VIT_16s0050g01020		VIT_17s0000g07670	VIT_19s0015g01200	VIT_12s0028g01040	VIT_19s0090g00360	VIT_19s0015g02050	VIT_18s0001g02790	VIT_16s0050g01400	VIT_14s0068g00930	VIT_02s0012g01450	VIT_07s0005g00180	VIT_05s0062g00760	VIT_08s0007g07050	VIT_14s0081g00580	VIT_08s0058g00200			VIT_19s0085g00940
VIT_02s0154g00410	VIT_07s0151g00280	VIT_03s0063g01380				VIT_10s0003g01550		VIT_14s0068g01440	VIT_05s0029g00070	VIT_09s0002g03440	VIT_03s0063g00150	VIT_19s0015g02940	VIT_18s0001g03610	VIT_07s0129g00240	VIT_05s0136g00260	VIT_17s0000g03580	VIT_12s0028g01600	VIT_16s0098g00200	VIT_12s0057g00220	VIT_14s0068g01300	VIT_04s0008g01850			VIT_00s0203g00070
VIT_02s0025g02490	VIT_12s0057g00200	VIT_01s0011g00530				VIT_08s0007g01520		VIT_02s0025g04410	VIT_09s0018g02130	VIT_15s0046g02480	VIT_01s0127g00340	VIT_02s0025g04890	VIT_01s0011g04620	VIT_05s0020g04300	VIT_14s0068g00920	VIT_08s0058g00960	VIT_18s0001g00190	VIT_10s0003g01990	VIT_17s0000g08380	VIT_07s0005g02180	VIT_01s0150g00050			VIT_19s0014g03820
VIT_01s0011g04550	VIT_02s0012g00740	VIT_11s0052g00670				VIT_11s0016g03880		VIT_05s0020g04540	VIT_13s0156g00210	VIT_03s0038g03040	VIT_18s0122g00830	VIT_02s0012g02340	VIT_05s0077g02270	VIT_07s0129g00110	VIT_13s0067g02870	VIT_07s0151g00450	VIT_01s0011g04820	VIT_07s0005g02100	VIT_13s0067g02710	VIT_04s0008g02200	VIT_07s0005g01710			VIT_18s0001g05670
VIT_07s0151g00810	VIT_16s0022g00680	VIT_07s0104g00860				VIT_01s0011g03860		VIT_11s0016g04700	VIT_06s0004g01270	VIT_00s0479g00010	VIT_14s0081g00710	VIT_09s0002g06450	VIT_06s0004g02230	VIT_07s0129g00180	VIT_13s0067g03820	VIT_03s0038g04760	VIT_13s0073g00560	VIT_04s0044g00050	VIT_01s0011g03420	VIT_03s0091g00450	VIT_07s0031g01840			VIT_11s0016g01320
VIT_13s0074g00650	VIT_02s0154g00080	VIT_07s0005g02570				VIT_14s0128g00160		VIT_02s0025g04540	VIT_04s0023g01100	VIT_17s0000g01460	VIT_17s0000g02120	VIT_09s0002g06440	VIT_13s0019g00900	VIT_08s0007g08960	VIT_03s0038g04510	VIT_13s0067g00140	VIT_19s0177g00280	VIT_13s0067g03780	VIT_13s0019g03390	VIT_18s0001g08550	VIT_11s0037g00150			VIT_16s0039g01710
VIT_10s0071g00840	VIT_04s0008g05740	VIT_01s0026g01730				VIT_01s0011g06150		VIT_12s0035g00910	VIT_02s0241g00140	VIT_06s0004g04810	VIT_18s0001g15130	VIT_18s0001g11500	VIT_03s0063g00030	VIT_11s0016g00490	VIT_01s0011g04990	VIT_08s0007g06160	VIT_08s0040g01760	VIT_12s0028g01350	VIT_18s0001g02750	VIT_15s0024g00080	VIT_00s0179g00090			VIT_05s0077g00500
VIT_19s0014g02720	VIT_13s0156g00090	VIT_13s0067g02500				VIT_07s0104g00890		VIT_10s0071g00810	VIT_17s0000g05840	VIT_01s0026g01880	VIT_00s0179g00320	VIT_07s0129g00760	VIT_09s0002g06770	VIT_01s0010g02170	VIT_06s0009g02550	VIT_03s0038g04450	VIT_17s0000g09680	VIT_12s0028g01640	VIT_08s0040g02190	VIT_09s0054g00930	VIT_12s0035g00900			VIT_00s1352g00010
VIT_12s0028g02110	VIT_01s0010g02440	VIT_01s0026g00200				VIT_14s0068g00940		VIT_14s0066g02220	VIT_18s0001g13870	VIT_14s0128g00160	VIT_16s0050g00840	VIT_07s0129g00800	VIT_01s0010g03890	VIT_03s0063g02040	VIT_17s0000g03040	VIT_04s0023g02430	VIT_04s0008g02950	VIT_11s0016g03880	VIT_01s0010g00560	VIT_18s0001g07680	VIT_09s0054g00530			VIT_11s0078g00480
VIT_09s0002g04180	VIT_09s0002g01710	VIT_11s0052g01710				VIT_09s0002g03440		VIT_08s0007g02320	VIT_18s0122g00180	VIT_11s0052g00800	VIT_05s0051g00680	VIT_07s0129g00710	VIT_04s0008g05520	VIT_09s0002g08100	VIT_15s0021g00830	VIT_10s0003g01260	VIT_04s0008g01780	VIT_15s0046g02030		VIT_06s0004g02100	VIT_19s0014g03960			VIT_12s0035g02020
VIT_04s0044g00610	VIT_10s0092g00360	VIT_01s0026g01140				VIT_11s0016g04570		VIT_18s0001g11030	VIT_06s0009g01910	VIT_07s0031g00480	VIT_14s0006g01530	VIT_18s0001g11580	VIT_11s0016g05050	VIT_02s0236g00140	VIT_11s0016g00650	VIT_04s0023g02880	VIT_07s0151g00750	VIT_01s0026g01880		VIT_04s0008g06020	VIT_14s0066g02340			VIT_17s0000g03660
VIT_14s0083g00750	VIT_13s0019g02280	VIT_00s1356g00010				VIT_10s0116g00440		VIT_08s0007g08660	VIT_13s0074g00760	VIT_06s0004g04580	VIT_11s0016g02980	VIT_12s0035g00610	VIT_16s0022g02370	VIT_04s0008g00960	VIT_05s0051g00340	VIT_14s0066g01860	VIT_12s0057g01400	VIT_07s0104g00890		VIT_03s0038g02920	VIT_08s0040g00590			VIT_14s0108g01070
VIT_18s0001g10480	VIT_04s0008g00510	VIT_19s0014g05000				VIT_04s0008g00440		VIT_04s0008g06830	VIT_01s0010g03850	VIT_10s0116g00440	VIT_11s0078g00260	VIT_15s0048g01700	VIT_01s0244g00110	VIT_15s0048g02230	VIT_06s0061g00270	VIT_06s0004g04180	VIT_18s0001g12350	VIT_01s0127g00130		VIT_11s0037g01210	VIT_05s0020g01800			VIT_08s0007g07640
VIT_08s0007g07320	VIT_08s0217g00090	VIT_02s0025g03070				VIT_06s0004g06150		VIT_09s0018g01660	VIT_05s0049g01460	VIT_18s0001g10470	VIT_08s0007g02950	VIT_15s0048g01690	VIT_12s0059g00600	VIT_13s0175g00080	VIT_17s0000g03750	VIT_01s0026g00850	VIT_00s0194g00270	VIT_08s0040g00010		VIT_18s0122g00590	VIT_01s0011g04310			VIT_04s0008g02710
VIT_07s0031g00730	VIT_07s0005g01290	VIT_00s0583g00040				VIT_05s0062g01070		VIT_04s0008g06850	VIT_14s0108g01550	VIT_05s0049g01220	VIT_04s0023g01150	VIT_16s0100g00600	VIT_02s0025g00860	VIT_08s0032g01220	VIT_18s0001g03080	VIT_00s0956g00020	VIT_00s0270g00100	VIT_00s0262g00010		VIT_13s0064g00560	VIT_14s0219g00040			VIT_14s0068g01780
VIT_14s0066g00610	VIT_09s0002g00960	VIT_05s0094g00470				VIT_17s0000g09710		VIT_19s0090g00060	VIT_16s0098g01070	VIT_18s0001g10070	VIT_05s0020g04500	VIT_16s0039g00760	VIT_17s0000g01210	VIT_14s0108g01000	VIT_05s0094g00240	VIT_02s0025g04630	VIT_02s0012g01090	VIT_04s0008g01220		VIT_07s0031g00700	VIT_04s0008g04470			VIT_18s0001g13420
VIT_18s0001g12430	VIT_05s0020g04130	VIT_08s0007g01530				VIT_15s0048g00680		VIT_09s0002g06120	VIT_19s0014g01690	VIT_00s0484g00020	VIT_18s0001g06070	VIT_16s0039g01060	VIT_09s0002g01540	VIT_17s0000g02480	VIT_18s0001g02700	VIT_08s0056g01200	VIT_03s0017g01210	VIT_04s0043g00160		VIT_17s0000g07440	VIT_00s0203g00200			VIT_18s0117g00340
VIT_11s0016g05430	VIT_11s0016g04220	VIT_00s0916g00010				VIT_04s0043g00160		VIT_05s0102g00090	VIT_15s0048g02680	VIT_01s0011g04270	VIT_04s0008g02630	VIT_16s0039g00820	VIT_16s0022g01870	VIT_01s0010g02950	VIT_07s0151g00250	VIT_18s0041g01880	VIT_03s0038g02100	VIT_10s0003g02910		VIT_04s0008g02570	VIT_14s0060g01550			VIT_09s0018g01630
VIT_07s0151g01080	VIT_14s0060g02140	VIT_04s0008g00610				VIT_18s0001g15720		VIT_18s0001g10690	VIT_16s0100g00620	VIT_16s0098g00190	VIT_11s0052g00400	VIT_07s0141g00890	VIT_16s0039g00310	VIT_06s0080g00450	VIT_04s0008g07080	VIT_14s0066g02180	VIT_03s0063g01890	VIT_18s0001g15720		VIT_14s0108g00710	VIT_17s0000g07330			VIT_01s0010g03930
VIT_04s0044g00970	VIT_03s0063g01890	VIT_19s0090g01780				VIT_06s0004g08210		VIT_03s0063g01010	VIT_14s0108g00150	VIT_16s0050g01690	VIT_11s0016g01810	VIT_07s0141g00920	VIT_00s0199g00230	VIT_02s0025g04520	VIT_13s0064g00030	VIT_18s0001g11170	VIT_07s0005g01650	VIT_00s1764g00020		VIT_16s0098g00120	VIT_13s0084g00310			VIT_07s0005g02570
VIT_19s0027g00600	VIT_02s0025g02740	VIT_05s0020g04860				VIT_03s0038g03040		VIT_03s0063g01000	VIT_12s0059g00290	VIT_17s0000g08760	VIT_18s0001g05020	VIT_14s0006g01670	VIT_18s0072g00150	VIT_17s0000g05520	VIT_00s0499g00040	VIT_14s0036g00460	VIT_08s0007g02780	VIT_13s0019g01080		VIT_16s0050g02330	VIT_03s0038g02190			VIT_15s0046g02150
VIT_03s0063g01380	VIT_02s0025g04130	VIT_19s0015g00190				VIT_09s0002g02420		VIT_15s0048g02070	VIT_04s0008g01080	VIT_17s0000g09170	VIT_14s0030g00190	VIT_14s0006g01680	VIT_00s0301g00040	VIT_08s0007g08300	VIT_13s0067g01950	VIT_00s1352g00010	VIT_12s0059g02520	VIT_16s0098g00190		VIT_18s0001g14010	VIT_03s0091g00360			VIT_10s0003g02810
VIT_05s0020g01830	VIT_17s0000g01110					VIT_06s0004g02880		VIT_09s0002g05810	VIT_09s0054g01880	VIT_12s0057g00800	VIT_18s0001g02690	VIT_13s0067g01070	VIT_18s0001g14250	VIT_03s0038g03960	VIT_08s0007g06800	VIT_14s0060g00240	VIT_13s0019g02110	VIT_00s0567g00010		VIT_14s0068g02000	VIT_14s0066g02360			VIT_10s0003g01600
VIT_07s0031g02560	VIT_09s0002g05730					VIT_18s0001g10310		VIT_00s0981g00010	VIT_06s0004g00940	VIT_02s0241g00120	VIT_05s0094g01540	VIT_03s0038g04000	VIT_00s0174g00110	VIT_19s0090g00410	VIT_06s0004g01080	VIT_04s0023g03110	VIT_13s0019g05100	VIT_04s0044g01290		VIT_08s0007g03690	VIT_19s0015g01200			VIT_10s0116g01200
VIT_04s0008g00720	VIT_01s0137g00720					VIT_15s0046g02030		VIT_00s0657g00010	VIT_05s0020g02800	VIT_05s0020g01690	VIT_13s0067g02560	VIT_18s0001g09990	VIT_04s0044g00130	VIT_00s0179g00260	VIT_05s0077g01960	VIT_12s0028g03050	VIT_13s0158g00320	VIT_18s0001g06200		VIT_08s0007g08260	VIT_17s0000g09370			VIT_11s0037g01400
VIT_18s0089g01140	VIT_15s0046g03180					VIT_04s0044g01290		VIT_00s0558g00010	VIT_01s0127g00720	VIT_19s0014g03400	VIT_13s0156g00150	VIT_03s0180g00010	VIT_06s0004g05950	VIT_13s0156g00210	VIT_12s0059g01070	VIT_01s0011g02510	VIT_14s0171g00110	VIT_03s0091g00470		VIT_17s0000g01410	VIT_13s0019g02200			VIT_05s0049g00480
VIT_12s0057g00180	VIT_12s0028g03190					VIT_12s0142g00130		VIT_12s0121g00300	VIT_18s0089g00380	VIT_05s0062g01070	VIT_12s0059g01900	VIT_07s0031g00050	VIT_18s0001g11970	VIT_03s0063g00530	VIT_16s0013g01960	VIT_01s0010g03710	VIT_00s0199g00230	VIT_14s0060g02150		VIT_04s0008g05620	VIT_03s0063g00310			VIT_12s0028g02530
VIT_12s0057g00170	VIT_17s0000g07690					VIT_00s0434g00020		VIT_12s0055g01160	VIT_13s0067g00730	VIT_04s0043g00160	VIT_12s0059g01340	VIT_14s0030g01560	VIT_15s0046g03150	VIT_01s0010g02930	VIT_14s0108g00710	VIT_18s0117g00340	VIT_00s0211g00130	VIT_08s0007g03870		VIT_01s0010g01080	VIT_05s0049g02240			VIT_07s0005g01360
VIT_12s0057g00090	VIT_17s0000g01000					VIT_18s0001g10700		VIT_12s0055g01280	VIT_10s0003g00960	VIT_11s0016g03880	VIT_04s0008g03570	VIT_00s0409g00040	VIT_01s0011g05450	VIT_08s0007g05790	VIT_10s0003g05680	VIT_13s0067g02290	VIT_00s0225g00100	VIT_01s0137g00690		VIT_15s0045g01310	VIT_06s0004g07830			VIT_10s0003g00850
VIT_12s0057g00080	VIT_14s0068g00300					VIT_07s0031g00540		VIT_11s0052g00300	VIT_06s0004g00410	VIT_16s0098g00200	VIT_14s0066g02190	VIT_17s0000g08770	VIT_10s0116g01810	VIT_05s0020g04420	VIT_11s0103g00760	VIT_08s0058g01390	VIT_00s0225g00120	VIT_08s0007g00200		VIT_15s0048g00980	VIT_18s0001g02570			VIT_01s0011g04080
VIT_12s0057g00070	VIT_12s0035g01170					VIT_01s0137g00690		VIT_08s0007g03890	VIT_00s0394g00010	VIT_01s0011g04290	VIT_15s0048g01050	VIT_14s0066g00900	VIT_13s0019g01510	VIT_17s0000g03380	VIT_14s0083g00320	VIT_15s0046g02150	VIT_00s0261g00040	VIT_19s0014g05330		VIT_06s0009g01320	VIT_12s0059g01190			VIT_01s0010g02200
VIT_12s0057g00120	VIT_14s0066g00100					VIT_05s0029g01490		VIT_07s0005g00470	VIT_17s0000g08870	VIT_01s0011g04300	VIT_19s0014g03480	VIT_16s0050g00090	VIT_04s0008g02380	VIT_08s0007g05980	VIT_02s0012g01570	VIT_07s0031g01710	VIT_00s0333g00020	VIT_01s0026g01640		VIT_07s0031g01040	VIT_10s0116g00190			VIT_08s0040g00380
VIT_12s0057g00110	VIT_19s0014g03720					VIT_18s0001g10350		VIT_07s0005g04550	VIT_01s0127g00010	VIT_01s0011g03890	VIT_07s0255g00110	VIT_18s0001g13780	VIT_03s0038g01510	VIT_17s0000g03390	VIT_13s0019g02940	VIT_10s0116g01200	VIT_00s0337g00040	VIT_18s0001g10350		VIT_12s0059g01380	VIT_04s0044g01880			VIT_01s0150g00350
VIT_12s0057g00100	VIT_00s0516g00020					VIT_13s0019g00750		VIT_07s0104g00820	VIT_04s0008g03380	VIT_00s0203g00050	VIT_06s0004g01210	VIT_15s0048g00970	VIT_08s0007g07060	VIT_01s0010g02940	VIT_04s0008g05540	VIT_13s0067g03140	VIT_00s0823g00020	VIT_13s0019g00750		VIT_05s0049g00430	VIT_09s0002g05150			VIT_13s0019g02020
VIT_00s2547g00010	VIT_00s0238g00020					VIT_08s0007g04780		VIT_07s0005g01450	VIT_07s0005g03710	VIT_06s0004g02880	VIT_03s0038g01380	VIT_17s0000g04890	VIT_00s0203g00150	VIT_18s0122g00180	VIT_08s0007g07930	VIT_17s0000g05810	VIT_01s0011g05300	VIT_10s0003g00790		VIT_04s0008g01510	VIT_11s0016g03540			VIT_18s0001g11930
VIT_06s0004g07500	VIT_01s0150g00480					VIT_06s0004g03700		VIT_08s0007g06160	VIT_08s0040g00490	VIT_10s0003g02000	VIT_05s0020g03150	VIT_14s0030g00670	VIT_15s0048g00770	VIT_11s0016g05740	VIT_04s0023g00300	VIT_07s0031g01270	VIT_02s0012g00020	VIT_03s0038g02980		VIT_18s0001g10380	VIT_09s0002g04080			VIT_02s0109g00230
VIT_07s0005g01520	VIT_05s0049g02080					VIT_07s0005g06090		VIT_18s0001g08710	VIT_00s0698g00010	VIT_19s0014g00710	VIT_18s0001g05220	VIT_01s0011g06450	VIT_15s0046g01340	VIT_08s0040g00470	VIT_16s0013g01990	VIT_02s0025g03030	VIT_02s0012g00460	VIT_07s0005g02130		VIT_06s0009g01090	VIT_06s0009g03450			VIT_16s0100g00570
VIT_07s0005g02570	VIT_11s0103g00630					VIT_06s0061g01210		VIT_05s0077g01140	VIT_04s0044g00020	VIT_10s0003g01900	VIT_15s0021g00940	VIT_07s0005g00590	VIT_12s0035g01340	VIT_14s0006g01030	VIT_03s0038g02130	VIT_14s0083g01000	VIT_02s0025g01300	VIT_10s0003g04540		VIT_04s0008g01570	VIT_07s0141g00290			VIT_04s0023g02790
VIT_01s0010g03930	VIT_18s0001g05480					VIT_14s0171g00400		VIT_08s0007g00430	VIT_11s0016g00910	VIT_13s0019g04610	VIT_09s0054g01750	VIT_05s0049g00400	VIT_00s0337g00040	VIT_07s0005g03830	VIT_03s0038g02450	VIT_05s0029g00650	VIT_02s0025g02450	VIT_01s0011g01140		VIT_12s0059g01560	VIT_15s0046g00290			VIT_14s0060g02300
VIT_17s0000g01280	VIT_17s0000g00730					VIT_01s0011g01140		VIT_13s0019g03420	VIT_08s0056g01480	VIT_11s0052g00700	VIT_02s0025g01710	VIT_00s0181g00250	VIT_16s0013g00240	VIT_11s0206g00080	VIT_11s0052g01800	VIT_05s0049g01160	VIT_03s0038g04410	VIT_05s0020g00440		VIT_18s0001g10540	VIT_16s0098g00900			VIT_07s0031g02560
VIT_06s0004g02030	VIT_17s0000g05830					VIT_10s0003g04540		VIT_13s0019g01490	VIT_08s0007g00020	VIT_07s0005g02100	VIT_17s0000g04810	VIT_11s0016g05540	VIT_04s0023g01090	VIT_00s0181g00220	VIT_06s0004g04030	VIT_02s0025g04270	VIT_04s0023g01090	VIT_06s0009g00480		VIT_13s0019g01840	VIT_15s0048g02540			VIT_04s0044g00040
VIT_01s0026g00200	VIT_07s0005g03990					VIT_14s0068g02190		VIT_18s0001g09970	VIT_13s0073g00050	VIT_00s0456g00020	VIT_07s0031g00840	VIT_18s0001g12800	VIT_18s0001g05830	VIT_11s0206g00090	VIT_02s0025g04830	VIT_02s0025g04230	VIT_05s0020g01820	VIT_06s0009g01110		VIT_16s0013g02090	VIT_08s0040g03120			VIT_00s0333g00050
VIT_06s0061g00550	VIT_16s0022g02370					VIT_10s0116g00760		VIT_01s0010g01430	VIT_10s0116g01780	VIT_12s0134g00270	VIT_09s0054g01760	VIT_06s0009g02790	VIT_02s0025g00550	VIT_14s0060g01470	VIT_03s0110g00370	VIT_18s0072g00380	VIT_05s0077g02100	VIT_19s0014g01710		VIT_08s0040g02600	VIT_01s0010g02070			VIT_09s0002g03690
VIT_12s0059g02510	VIT_08s0058g01350					VIT_05s0020g00740		VIT_07s0129g00240	VIT_05s0020g00830	VIT_19s0014g04640	VIT_05s0102g00760	VIT_17s0000g01950	VIT_06s0004g04110	VIT_11s0206g00070	VIT_03s0110g00360	VIT_11s0016g03140	VIT_05s0077g02270	VIT_02s0025g04490		VIT_13s0019g00420	VIT_13s0067g01960			VIT_05s0077g01650
VIT_05s0077g01390	VIT_14s0068g01520					VIT_18s0076g00250		VIT_13s0047g00310	VIT_06s0004g07870	VIT_19s0014g04600	VIT_06s0009g02110	VIT_03s0038g03170	VIT_10s0092g00640	VIT_08s0007g07190	VIT_01s0011g04710	VIT_14s0066g01620	VIT_05s0094g01460	VIT_13s0019g03270		VIT_15s0107g00320	VIT_07s0141g00690			VIT_05s0077g01560
VIT_01s0011g02160	VIT_09s0002g05680					VIT_06s0004g06890		VIT_03s0038g04400	VIT_04s0008g05770	VIT_09s0002g00150	VIT_05s0049g00570	VIT_18s0001g00340	VIT_15s0046g00280	VIT_05s0020g03980	VIT_05s0020g02690	VIT_13s0067g02300	VIT_06s0004g00450	VIT_10s0116g00760		VIT_06s0061g00070	VIT_07s0129g00260			VIT_06s0004g01030
VIT_06s0004g02630	VIT_04s0008g05830					VIT_05s0049g00940		VIT_04s0008g05060	VIT_11s0016g00200	VIT_08s0007g01520	VIT_00s0264g00050	VIT_18s0122g01150	VIT_16s0013g00040	VIT_11s0016g01970	VIT_13s0019g03380	VIT_14s0060g02300	VIT_06s0004g05950	VIT_18s0072g00080		VIT_13s0019g00390	VIT_16s0013g00890			VIT_15s0045g01160
VIT_18s0001g01060	VIT_18s0001g03880					VIT_13s0067g02500		VIT_07s0129g00180	VIT_09s0070g00140	VIT_06s0004g02530	VIT_04s0008g01250	VIT_04s0044g00040	VIT_00s0203g00140	VIT_04s0008g01070	VIT_08s0040g01920	VIT_05s0049g01420	VIT_06s0009g02110	VIT_01s0026g01960		VIT_12s0059g02140	VIT_01s0011g03470			VIT_05s0077g01550
VIT_08s0040g02160	VIT_07s0104g00500					VIT_18s0001g12560		VIT_07s0129g00110	VIT_19s0090g01820	VIT_17s0000g09380	VIT_01s0026g01430	VIT_06s0004g01020	VIT_07s0031g01910	VIT_18s0001g03520	VIT_08s0040g01250	VIT_06s0004g00980	VIT_06s0080g00930	VIT_08s0007g07630		VIT_05s0020g01180	VIT_06s0004g06950			VIT_05s0102g00450
VIT_12s0028g03860	VIT_13s0147g00230					VIT_11s0016g03400		VIT_00s0463g00030	VIT_06s0004g08460	VIT_18s0001g10310	VIT_05s0094g01590	VIT_06s0004g01030	VIT_02s0025g05120	VIT_03s0038g03560	VIT_04s0008g02670	VIT_03s0091g00160	VIT_07s0005g02450	VIT_06s0004g06890		VIT_11s0065g00320	VIT_05s0049g00270			VIT_16s0050g00200
VIT_05s0020g04860	VIT_06s0004g06910					VIT_10s0405g00050		VIT_12s0059g01120	VIT_13s0156g00460	VIT_06s0004g06430	VIT_01s0011g02360	VIT_06s0004g01010	VIT_01s0011g00120	VIT_06s0004g00940	VIT_11s0118g00550	VIT_03s0063g02120	VIT_07s0031g02460	VIT_00s0181g00010		VIT_10s0042g00070	VIT_11s0037g00010			VIT_09s0002g02980
VIT_13s0019g00720	VIT_06s0004g02700					VIT_00s0181g00010		VIT_08s0007g04520	VIT_14s0030g00140	VIT_15s0046g02030	VIT_18s0122g00300	VIT_14s0066g00760	VIT_15s0046g02080	VIT_01s0127g00720	VIT_06s0004g01890	VIT_00s2569g00010	VIT_07s0130g00120	VIT_09s0054g00790		VIT_18s0001g13610	VIT_04s0008g05470			VIT_16s0050g00180
VIT_03s0063g00680	VIT_00s0499g00020					VIT_13s0019g03870		VIT_03s0063g00140	VIT_16s0098g00360	VIT_14s0068g00940	VIT_14s0171g00360	VIT_18s0075g00660	VIT_05s0077g00770	VIT_01s0011g02530	VIT_01s0026g02230	VIT_06s0004g00990	VIT_07s0255g00120	VIT_02s0025g04420		VIT_11s0016g01070	VIT_18s0001g10150			VIT_12s0057g00750
VIT_03s0017g02170	VIT_01s0026g00030					VIT_04s0023g03570		VIT_15s0048g02230	VIT_11s0103g00380	VIT_10s0003g02910	VIT_17s0000g07470	VIT_00s0174g00270	VIT_12s0134g00560	VIT_13s0320g00060	VIT_16s0050g00020	VIT_01s0011g05130	VIT_08s0007g04000	VIT_19s0014g02440		VIT_19s0085g01110	VIT_17s0000g07770			VIT_15s0024g00400
	VIT_12s0028g03330					VIT_03s0097g00510		VIT_18s0001g11060	VIT_15s0107g00320	VIT_10s0003g01990	VIT_06s0004g04910	VIT_04s0023g03470	VIT_09s0002g06920	VIT_06s0061g00890	VIT_08s0040g00500	VIT_18s0001g15640	VIT_08s0040g03130	VIT_04s0023g03570		VIT_04s0023g02450	VIT_00s0684g00030			VIT_18s0089g00600
	VIT_18s0001g09130					VIT_01s0182g00130		VIT_17s0000g09480	VIT_13s0019g01840	VIT_16s0050g01020	VIT_08s0007g04000	VIT_00s0362g00010	VIT_16s0022g01740	VIT_09s0002g02130	VIT_03s0063g00780	VIT_01s0011g06140	VIT_09s0002g03970	VIT_10s0003g02030		VIT_18s0001g09990	VIT_15s0046g00320			VIT_06s0009g01620
	VIT_17s0000g07470					VIT_10s0003g02030		VIT_04s0044g01270	VIT_08s0007g05700	VIT_19s0015g01120	VIT_01s0146g00020	VIT_10s0003g00260	VIT_04s0023g02500	VIT_09s0002g04500	VIT_06s0009g00980	VIT_03s0063g01730	VIT_09s0002g04240	VIT_04s0008g02860		VIT_00s0510g00050	VIT_02s0012g01320			VIT_06s0080g01200
	VIT_18s0001g07580					VIT_01s0150g00250		VIT_09s0002g04770	VIT_00s0338g00030	VIT_18s0001g15720	VIT_18s0001g03860	VIT_16s0100g00380	VIT_19s0014g02320	VIT_12s0035g01080	VIT_03s0180g00070	VIT_14s0068g00740	VIT_09s0002g07530	VIT_15s0046g00470		VIT_08s0007g02470	VIT_07s0031g01320			VIT_11s0118g00180
	VIT_13s0019g01200					VIT_05s0049g01550		VIT_10s0071g00670	VIT_04s0008g05220	VIT_14s0083g01130	VIT_04s0008g06060	VIT_18s0001g03240	VIT_18s0001g08750	VIT_08s0032g00800	VIT_13s0067g01420	VIT_01s0011g05150	VIT_09s0018g01960	VIT_10s0116g01610		VIT_18s0001g07340	VIT_04s0008g05190			VIT_02s0033g01400
	VIT_18s0001g12340					VIT_17s0000g05550		VIT_14s0030g02170	VIT_08s0007g03990	VIT_19s0014g00220	VIT_04s0008g00860	VIT_15s0046g03120	VIT_18s0001g08060	VIT_02s0025g03490	VIT_18s0001g02060	VIT_06s0004g00970	VIT_10s0071g01010	VIT_12s0059g00770		VIT_18s0001g13270	VIT_03s0063g00940			VIT_07s0129g00660
	VIT_01s0137g00780					VIT_06s0004g06080		VIT_03s0038g01380	VIT_07s0005g01030	VIT_12s0142g00130	VIT_18s0001g09290	VIT_15s0046g03090	VIT_18s0001g08010	VIT_00s0698g00010	VIT_04s0008g04260	VIT_01s0011g00380	VIT_11s0016g02630	VIT_02s0154g00320		VIT_01s0011g00740	VIT_13s0156g00060			VIT_01s0011g04860
	VIT_00s0291g00020					VIT_15s0021g00330		VIT_14s0108g01000	VIT_05s0020g05050	VIT_17s0000g02570	VIT_16s0050g00710	VIT_15s0046g00470	VIT_03s0038g04410	VIT_04s0044g00020	VIT_18s0001g09580	VIT_13s0067g01100	VIT_11s0016g03580	VIT_09s0002g05600		VIT_11s0037g00740	VIT_14s0108g01550			VIT_08s0040g01230
	VIT_09s0018g01290					VIT_16s0050g01860		VIT_11s0118g00540	VIT_02s0025g01850	VIT_00s0567g00010	VIT_01s0011g04810	VIT_09s0002g04280	VIT_07s0005g02450	VIT_18s0122g01320	VIT_03s0091g00280	VIT_11s0037g00660	VIT_11s0016g05430	VIT_09s0002g05490		VIT_04s0069g00990	VIT_06s0004g00830			VIT_10s0003g00420
	VIT_13s0019g03210					VIT_18s0001g00470		VIT_06s0080g01060	VIT_02s0025g01790	VIT_00s1194g00010	VIT_10s0116g01810	VIT_16s0022g00440	VIT_14s0060g01420	VIT_18s0001g04060	VIT_03s0038g02800	VIT_10s0003g01100	VIT_12s0028g00200	VIT_16s0050g01620		VIT_08s0040g01130	VIT_02s0025g01110			VIT_13s0019g01650
	VIT_08s0105g00500					VIT_00s0253g00040		VIT_03s0180g00030	VIT_13s0067g03230	VIT_04s0023g02420	VIT_06s0004g05500	VIT_19s0014g02850	VIT_14s0030g01750	VIT_07s0005g02820	VIT_08s0040g00930	VIT_08s0056g00290	VIT_12s0028g01000	VIT_14s0128g00380		VIT_12s0028g00610	VIT_01s0011g05810			VIT_12s0057g00420
	VIT_03s0063g01930					VIT_02s0154g00080		VIT_06s0080g00450	VIT_07s0031g00740	VIT_03s0091g00470	VIT_00s0317g00030	VIT_05s0049g00390	VIT_00s0179g00360	VIT_14s0128g00240	VIT_03s0180g00040	VIT_01s0011g02470	VIT_12s0034g01370	VIT_00s0370g00020		VIT_03s0091g01290	VIT_17s0000g06570			VIT_03s0038g03430
	VIT_10s0116g01180					VIT_12s0059g00770		VIT_03s0038g03960	VIT_18s0089g00630	VIT_00s0434g00020	VIT_06s0080g00570	VIT_05s0049g00310	VIT_17s0000g02480	VIT_09s0018g01840	VIT_12s0134g00500	VIT_08s0058g00690	VIT_13s0047g01120	VIT_12s0028g02240		VIT_03s0088g00260	VIT_15s0048g02410			VIT_00s0271g00110
	VIT_04s0008g00860					VIT_06s0009g01420		VIT_00s0179g00260	VIT_11s0037g00690	VIT_07s0141g00040	VIT_10s0116g01820	VIT_04s0008g00470	VIT_04s0023g03760	VIT_04s0008g02860	VIT_00s0199g00210	VIT_10s0071g00150	VIT_13s0106g00200	VIT_04s0008g06310		VIT_01s0026g00900	VIT_10s0003g05020			VIT_07s0005g00090
	VIT_04s0008g01700					VIT_09s0002g05600		VIT_00s0691g00010	VIT_14s0006g02620	VIT_18s0001g10700	VIT_05s0049g00140	VIT_16s0022g00310	VIT_06s0080g00930	VIT_10s0003g04540	VIT_18s0001g09920	VIT_18s0001g03260	VIT_14s0060g00250	VIT_03s0063g02610		VIT_00s1553g00010	VIT_01s0011g05230			VIT_11s0016g01220
	VIT_03s0017g02210					VIT_16s0050g01620		VIT_05s0020g04420	VIT_08s0058g00210	VIT_10s0405g00020	VIT_02s0025g02820	VIT_08s0007g05570	VIT_13s0156g00100	VIT_08s0058g00980	VIT_07s0005g06340	VIT_15s0024g00400	VIT_14s0060g00990	VIT_07s0031g01160		VIT_13s0019g02530	VIT_06s0004g08230			VIT_12s0134g00230
	VIT_00s0259g00170					VIT_13s0067g03750		VIT_13s0019g03890	VIT_01s0011g04990	VIT_16s0022g01690	VIT_02s0025g01720	VIT_08s0007g05580	VIT_19s0090g01200	VIT_08s0058g01090	VIT_08s0056g00210	VIT_04s0069g01010	VIT_14s0066g01120	VIT_12s0142g00390		VIT_16s0022g02200	VIT_00s0194g00080			VIT_18s0001g13980
	VIT_01s0137g00650					VIT_03s0017g01280		VIT_17s0000g03380	VIT_06s0004g00240	VIT_17s0000g05680	VIT_05s0020g02920	VIT_16s0022g02100	VIT_01s0010g03960	VIT_04s0008g05770	VIT_18s0122g00550	VIT_08s0007g02360	VIT_14s0068g00300	VIT_05s0165g00090		VIT_13s0019g02540	VIT_06s0004g07870			VIT_13s0067g02930
	VIT_15s0048g02910					VIT_18s0001g14660		VIT_08s0040g00470	VIT_18s0001g03080	VIT_07s0005g02130	VIT_13s0067g01150	VIT_07s0104g00440	VIT_13s0019g00890	VIT_06s0009g01840	VIT_05s0029g00040	VIT_06s0009g01620	VIT_14s0081g00710	VIT_12s0134g00200		VIT_11s0016g00960	VIT_05s0029g00080			VIT_12s0057g00430
	VIT_05s0020g00610					VIT_14s0108g00430		VIT_04s0008g02970	VIT_05s0062g01320	VIT_01s0182g00130	VIT_11s0016g05510	VIT_00s0340g00050	VIT_09s0002g06300	VIT_09s0070g00160	VIT_03s0063g00670	VIT_02s0012g01270	VIT_14s0171g00360	VIT_18s0001g06150		VIT_00s0454g00030	VIT_13s0019g04550			VIT_18s0089g00510
	VIT_09s0002g02620					VIT_00s0477g00040		VIT_03s0063g00880	VIT_18s0001g02700	VIT_14s0108g01120	VIT_04s0043g00850	VIT_00s0340g00060	VIT_07s0005g03390	VIT_15s0048g02740	VIT_16s0039g00430	VIT_13s0067g01940	VIT_15s0046g01560	VIT_10s0003g05380		VIT_12s0057g01450	VIT_05s0020g04570			VIT_03s0017g01040
	VIT_07s0005g02710					VIT_00s0370g00020		VIT_09s0002g04560	VIT_02s0012g02540	VIT_16s0050g01860	VIT_06s0004g02290	VIT_03s0038g03400	VIT_00s0174g00160	VIT_14s0030g00140	VIT_07s0005g03090	VIT_07s0031g01980	VIT_15s0046g02080	VIT_06s0061g00440		VIT_02s0025g04540	VIT_16s0100g00340			VIT_03s0017g01140
	VIT_14s0219g00090					VIT_14s0068g00250		VIT_11s0206g00070	VIT_19s0014g02970	VIT_08s0040g01740	VIT_14s0083g00410	VIT_02s0025g03450	VIT_10s0116g01720	VIT_12s0035g01680	VIT_19s0085g00690	VIT_03s0091g00310	VIT_16s0022g02370	VIT_14s0066g00250		VIT_01s0011g02960	VIT_19s0014g04960			VIT_03s0180g00040
	VIT_08s0007g03220					VIT_08s0040g02730		VIT_00s0181g00220	VIT_01s0011g01320	VIT_02s0154g00320	VIT_09s0002g08680	VIT_17s0000g04540	VIT_11s0037g00610	VIT_04s0008g05850	VIT_18s0001g14170	VIT_00s0780g00040	VIT_16s0050g00110	VIT_18s0001g06020		VIT_18s0001g14310	VIT_10s0003g01980			VIT_17s0000g00200
	VIT_10s0003g00220					VIT_19s0014g01470		VIT_11s0206g00090	VIT_04s0044g01680	VIT_03s0017g02260	VIT_06s0009g00310	VIT_16s0098g01700	VIT_13s0067g01680	VIT_06s0004g03580	VIT_14s0108g00980	VIT_12s0057g00420	VIT_16s0050g02190	VIT_01s0137g00720		VIT_15s0048g02430	VIT_14s0171g00140			VIT_05s0049g00510
	VIT_18s0001g01410					VIT_12s0028g02240		VIT_18s0001g11130	VIT_12s0028g03440	VIT_17s0000g05850	VIT_13s0019g03390	VIT_00s0370g00070	VIT_08s0007g08780	VIT_06s0004g07210	VIT_01s0026g02580	VIT_03s0038g03430	VIT_17s0000g03200	VIT_03s0017g01210		VIT_13s0047g00210	VIT_16s0098g01650			VIT_01s0011g02790
	VIT_09s0018g02110					VIT_08s0007g01480		VIT_11s0016g01970	VIT_09s0002g03170	VIT_17s0000g05860	VIT_01s0010g01810	VIT_15s0021g02470	VIT_12s0059g00190	VIT_14s0083g00530	VIT_08s0056g01230	VIT_11s0016g00520	VIT_17s0000g05650	VIT_17s0000g08820		VIT_06s0009g02860	VIT_07s0005g00110			VIT_14s0068g01040
	VIT_09s0002g03350					VIT_07s0031g01160		VIT_04s0008g01070	VIT_06s0004g07130	VIT_18s0001g14660	VIT_18s0001g02750	VIT_06s0004g04590	VIT_12s0059g00030	VIT_09s0002g02320	VIT_14s0060g01160	VIT_16s0098g01150	VIT_18s0001g08060	VIT_18s0001g06140		VIT_16s0098g00860	VIT_08s0007g07290			VIT_11s0037g00870
	VIT_04s0023g03360					VIT_18s0001g08100		VIT_14s0060g01290	VIT_04s0079g00410	VIT_12s0142g00390	VIT_13s0067g01680	VIT_10s0003g00580		VIT_14s0066g01920	VIT_01s0150g00210	VIT_12s0057g00430	VIT_18s0001g12520	VIT_03s0063g00840		VIT_13s0019g03430	VIT_00s0361g00080			VIT_18s0001g07700
	VIT_12s0035g01340					VIT_16s0022g01430		VIT_08s0040g00910	VIT_14s0108g01460	VIT_18s0001g12530	VIT_01s0137g00780	VIT_01s0010g02260		VIT_18s0072g00370	VIT_01s0137g00560	VIT_18s0089g00510	VIT_18s0072g00550	VIT_03s0038g03860		VIT_18s0001g12800	VIT_01s0011g00840			VIT_06s0004g05240
	VIT_05s0049g01720					VIT_12s0134g00200		VIT_18s0001g03520	VIT_14s0108g01470	VIT_18s0001g00490	VIT_08s0007g06710	VIT_08s0058g00260		VIT_18s0122g00120	VIT_10s0092g00370	VIT_18s0001g06120	VIT_19s0014g05220	VIT_01s0137g00360		VIT_12s0034g00130	VIT_14s0108g00630			VIT_04s0008g06000
	VIT_19s0085g00900					VIT_10s0003g02120		VIT_16s0039g01580	VIT_07s0104g00350	VIT_01s0011g03490	VIT_09s0002g08540	VIT_05s0049g00090		VIT_14s0066g01730	VIT_18s0001g12870	VIT_03s0017g01040	VIT_19s0090g00270	VIT_12s0142g00240		VIT_18s0041g00910	VIT_09s0002g05710			VIT_07s0005g00820
	VIT_18s0072g00270					VIT_11s0016g03590		VIT_10s0003g05550	VIT_08s0007g07930	VIT_12s0035g01200	VIT_17s0000g03790	VIT_06s0004g05240		VIT_02s0012g02190	VIT_00s0389g00040	VIT_18s0001g06090		VIT_02s0025g04130		VIT_12s0055g00320	VIT_08s0007g02240			VIT_03s0088g00700
	VIT_18s0001g00040					VIT_03s0017g01210		VIT_10s0003g05620	VIT_18s0001g14610	VIT_12s0035g01190	VIT_03s0091g00230	VIT_05s0049g00510		VIT_16s0039g02020	VIT_01s0010g03560	VIT_13s0067g03430		VIT_18s0001g06170		VIT_18s0041g00740	VIT_16s0039g00700			VIT_11s0052g01620
	VIT_07s0031g00110					VIT_07s0130g00320		VIT_06s0004g02590	VIT_11s0149g00090	VIT_14s0083g01140	VIT_17s0000g08380	VIT_02s0234g00130		VIT_00s0469g00020	VIT_02s0025g02570	VIT_17s0000g07580		VIT_01s0011g03490		VIT_15s0046g01950	VIT_10s0116g00760			VIT_01s0146g00480
	VIT_14s0066g00070					VIT_19s0014g03370		VIT_17s0000g08460	VIT_16s0022g01860	VIT_11s0016g04220	VIT_08s0007g03370	VIT_15s0021g01630		VIT_19s0015g00730	VIT_18s0001g09500	VIT_13s0067g03490		VIT_09s0002g00570		VIT_12s0055g00290	VIT_09s0002g06820			VIT_17s0000g07400
	VIT_18s0001g12400					VIT_18s0001g06140		VIT_03s0063g00820	VIT_12s0035g00080	VIT_16s0050g00150	VIT_07s0005g02450	VIT_16s0013g01110		VIT_05s0049g00010	VIT_07s0129g00730	VIT_11s0016g03350		VIT_18s0001g12930		VIT_00s0218g00150	VIT_05s0049g02310			VIT_07s0031g02390
	VIT_05s0020g01440					VIT_02s0025g00140		VIT_18s0001g10810	VIT_07s0005g05030	VIT_12s0178g00040	VIT_02s0087g00340	VIT_12s0028g03270		VIT_06s0004g08170	VIT_07s0031g01680	VIT_19s0014g03180		VIT_18s0001g06180		VIT_03s0017g02110	VIT_01s0011g06560			VIT_17s0000g07420
	VIT_13s0067g01930					VIT_07s0130g00340		VIT_18s0001g10800	VIT_16s0013g01990	VIT_10s0003g04950	VIT_17s0000g06360	VIT_07s0031g01980		VIT_04s0008g05610	VIT_02s0025g03320	VIT_18s0001g03240		VIT_18s0001g05840		VIT_00s0218g00160	VIT_19s0014g04790			VIT_12s0059g00340
	VIT_12s0057g00240					VIT_09s0002g00570		VIT_16s0050g02360	VIT_07s0005g03310	VIT_18s0001g04700	VIT_06s0004g07970	VIT_16s0100g00400		VIT_11s0016g03130	VIT_16s0039g00880	VIT_08s0007g03810		VIT_16s0050g01990		VIT_03s0017g02000	VIT_05s0020g02250			VIT_05s0020g04380
	VIT_17s0000g06630					VIT_12s0035g01190		VIT_18s0001g05620	VIT_03s0038g02220	VIT_16s0050g01250	VIT_01s0026g02620	VIT_16s0013g01120		VIT_10s0116g00920	VIT_18s0122g00790	VIT_06s0004g05240		VIT_02s0012g00660		VIT_03s0017g02140	VIT_18s0001g09490			VIT_05s0020g04420
	VIT_05s0020g02890					VIT_09s0002g03150		VIT_11s0016g02470	VIT_05s0049g00980	VIT_18s0001g12930	VIT_14s0108g00590	VIT_16s0013g01080		VIT_18s0089g00660	VIT_17s0000g01370	VIT_18s0001g11240		VIT_08s0058g00680		VIT_05s0062g00710	VIT_04s0008g05240			VIT_04s0008g01080
	VIT_11s0118g00770					VIT_11s0016g04760		VIT_11s0016g03580	VIT_00s0207g00220	VIT_10s0003g02120	VIT_09s0018g01790	VIT_17s0000g00200		VIT_01s0011g06440	VIT_18s0001g09400	VIT_04s0008g06000		VIT_07s0005g00120		VIT_03s0017g02120	VIT_04s0008g01660			VIT_03s0063g00880
	VIT_04s0023g01170					VIT_01s0010g03880		VIT_14s0066g02030	VIT_10s0003g02710	VIT_18s0041g02150	VIT_06s0004g04010	VIT_08s0040g02730		VIT_05s0077g02150	VIT_16s0050g00090	VIT_00s0772g00020		VIT_00s0256g00050		VIT_07s0129g00760	VIT_16s0100g00460			VIT_10s0003g00340
	VIT_00s0189g00010					VIT_01s0026g00960		VIT_08s0007g00030	VIT_04s0079g00810	VIT_18s0041g02160	VIT_06s0004g03590	VIT_04s0008g02340		VIT_14s0066g02040	VIT_01s0011g02840	VIT_07s0151g00440		VIT_14s0066g00600		VIT_07s0129g00800	VIT_13s0064g00940			VIT_12s0059g00370
	VIT_19s0014g02320					VIT_18s0122g00330		VIT_13s0064g00620	VIT_07s0104g01480	VIT_09s0002g03150	VIT_08s0007g00750	VIT_12s0028g01780		VIT_01s0010g00920	VIT_09s0002g06000	VIT_07s0129g00580		VIT_06s0004g04490		VIT_10s0003g00480	VIT_01s0011g00770			VIT_13s0019g02710
	VIT_19s0015g01230					VIT_01s0150g00480		VIT_11s0052g01700	VIT_14s0083g00640	VIT_01s0011g00470	VIT_16s0100g00690	VIT_12s0028g01770		VIT_04s0008g00140	VIT_00s0252g00040	VIT_17s0000g07560		VIT_11s0016g00820		VIT_10s0003g00470	VIT_03s0038g02470			VIT_01s0010g01390
	VIT_05s0020g03360					VIT_07s0129g00430		VIT_09s0070g00160	VIT_04s0008g07340	VIT_16s0022g01430	VIT_14s0108g00740	VIT_18s0001g06550		VIT_05s0094g00220	VIT_03s0180g00130	VIT_17s0000g07370		VIT_12s0059g01300		VIT_16s0100g01000	VIT_08s0007g03270			VIT_12s0057g00510
	VIT_08s0058g00480					VIT_05s0020g01080		VIT_06s0080g01090	VIT_19s0014g03200	VIT_04s0023g02210	VIT_06s0004g05150	VIT_05s0077g02140		VIT_05s0094g00300	VIT_13s0019g04310	VIT_04s0023g03600		VIT_08s0007g08240		VIT_02s0033g00270	VIT_19s0140g00210			VIT_10s0003g05480
	VIT_09s0002g00260					VIT_07s0031g00660		VIT_06s0004g07210	VIT_17s0000g09100	VIT_03s0038g02100	VIT_05s0077g00030	VIT_00s0181g00080		VIT_19s0014g04940	VIT_06s0004g06550	VIT_17s0000g07420		VIT_08s0007g02520		VIT_16s0100g00900	VIT_13s0019g02690			VIT_17s0000g02010
	VIT_03s0088g01160					VIT_12s0059g01300		VIT_05s0102g00260	VIT_02s0025g03010	VIT_01s0137g00360	VIT_19s0015g00130	VIT_06s0004g07520		VIT_03s0038g04260	VIT_04s0023g01610	VIT_18s0122g00180		VIT_10s0071g00300		VIT_16s0100g00830	VIT_00s0625g00020			VIT_00s0203g00050
	VIT_06s0004g06970					VIT_13s0064g01510		VIT_04s0044g01180	VIT_14s0060g02090	VIT_06s0004g01670	VIT_02s0025g04550	VIT_06s0009g03680		VIT_04s0008g07140	VIT_14s0083g00050	VIT_00s0347g00040		VIT_07s0031g00770		VIT_16s0100g01170	VIT_07s0191g00010			VIT_05s0077g01090
	VIT_19s0090g00570					VIT_07s0151g00850		VIT_09s0002g02320	VIT_13s0074g00770	VIT_10s0003g05380	VIT_01s0137g00510	VIT_13s0019g00390		VIT_09s0002g06980	VIT_15s0046g01010	VIT_11s0016g01970		VIT_19s0014g02720		VIT_18s0122g00450	VIT_05s0102g01210			VIT_18s0001g11620
	VIT_13s0067g03020					VIT_18s0001g14410		VIT_18s0122g00120	VIT_16s0050g00150	VIT_14s0066g00250	VIT_09s0018g01190	VIT_00s0214g00130		VIT_18s0157g00190	VIT_06s0004g08490	VIT_19s0014g04650		VIT_18s0001g13080		VIT_16s0100g00750	VIT_09s0002g03590			VIT_18s0122g01240
	VIT_11s0016g04110					VIT_15s0046g01560		VIT_12s0059g00960	VIT_05s0020g02690	VIT_18s0001g06140	VIT_10s0003g00900	VIT_08s0040g00010		VIT_11s0016g05060	VIT_14s0066g01660	VIT_03s0063g00880		VIT_08s0058g01100		VIT_13s0064g00270	VIT_06s0061g00410			VIT_01s0146g00350
	VIT_18s0001g05040					VIT_15s0021g01550		VIT_12s0059g01000	VIT_13s0019g03380	VIT_18s0001g15000	VIT_11s0037g00570	VIT_09s0002g01000		VIT_06s0009g03750	VIT_08s0007g08150	VIT_12s0059g00370		VIT_03s0038g03660		VIT_08s0058g00790	VIT_14s0060g00690			VIT_00s0262g00120
	VIT_02s0025g05030					VIT_18s0001g10480		VIT_12s0059g00990	VIT_17s0000g01050	VIT_01s0127g00910	VIT_06s0061g01300	VIT_08s0058g00440		VIT_01s0011g02860	VIT_17s0000g07630	VIT_18s0001g11830		VIT_08s0007g02860		VIT_02s0033g00260	VIT_19s0177g00100			VIT_19s0014g03400
	VIT_04s0008g06670					VIT_08s0058g01100		VIT_19s0015g00710	VIT_01s0026g02480	VIT_12s0055g00800	VIT_00s0591g00020	VIT_08s0058g00410		VIT_09s0002g03170	VIT_14s0006g02690	VIT_12s0134g00240		VIT_12s0028g03800		VIT_16s0100g01120	VIT_08s0007g00930			VIT_09s0070g00140
	VIT_09s0002g02220					VIT_00s2269g00010		VIT_00s0414g00040	VIT_18s0122g00460	VIT_01s0146g00370	VIT_15s0048g00350	VIT_16s0098g00860		VIT_17s0000g04220	VIT_18s0001g10540	VIT_17s0000g03370		VIT_05s0049g01720		VIT_16s0100g00910	VIT_06s0004g00620			VIT_13s0156g00570
						VIT_08s0007g04890		VIT_00s0414g00020	VIT_03s0063g00940	VIT_00s0181g00020	VIT_03s0180g00130	VIT_06s0009g03010		VIT_08s0007g05250	VIT_18s0117g00220	VIT_09s0002g04560		VIT_03s0088g00620		VIT_16s0100g00770	VIT_18s0041g01860			VIT_12s0057g01160
						VIT_10s0003g03250		VIT_00s0414g00060	VIT_08s0040g01250	VIT_15s0048g01880	VIT_03s0038g04490	VIT_06s0009g02860		VIT_00s0527g00010	VIT_07s0005g00590	VIT_00s1372g00020		VIT_14s0068g01620		VIT_06s0061g00450	VIT_06s0004g05230			VIT_00s0207g00280
						VIT_00s0203g00180		VIT_05s0049g00010	VIT_18s0072g00140	VIT_01s0011g04770	VIT_07s0031g02700	VIT_18s0001g03430		VIT_18s0122g00630	VIT_18s0001g12360	VIT_14s0108g00280		VIT_00s0203g00180		VIT_00s0615g00020	VIT_00s0324g00040			VIT_16s0050g01700
						VIT_08s0056g00510		VIT_02s0025g01750	VIT_02s0087g01020	VIT_14s0006g02490	VIT_06s0004g02620	VIT_10s0003g02430		VIT_13s0064g00270	VIT_07s0005g03930	VIT_13s0156g00590		VIT_08s0056g00510		VIT_11s0052g01110	VIT_01s0011g04820			VIT_16s0050g01880
						VIT_11s0016g04920		VIT_02s0025g01760	VIT_14s0030g02300	VIT_16s0050g01010	VIT_14s0108g01110	VIT_10s0003g02450		VIT_13s0101g00250	VIT_18s0001g12800	VIT_16s0039g01310		VIT_05s0020g03160		VIT_02s0025g00760	VIT_13s0073g00560			VIT_00s0772g00010
						VIT_10s0003g01070		VIT_02s0025g01950	VIT_18s0001g05680	VIT_01s0010g02910	VIT_03s0038g00880	VIT_14s0066g01320		VIT_03s0017g01040	VIT_01s0011g03380	VIT_02s0025g04350		VIT_06s0004g04350		VIT_02s0025g00750	VIT_08s0056g00810			VIT_07s0129g01070
						VIT_18s0001g11120		VIT_02s0025g01920	VIT_02s0025g03630	VIT_11s0016g01190	VIT_00s0317g00050	VIT_09s0002g02980		VIT_17s0000g07020	VIT_03s0038g03140	VIT_16s0148g00060		VIT_08s0058g00670		VIT_13s0067g00680	VIT_03s0063g02610			VIT_19s0014g04160
						VIT_15s0046g01380		VIT_04s0008g05610	VIT_02s0025g03640	VIT_06s0004g06290	VIT_12s0028g01120	VIT_18s0072g00770		VIT_11s0016g05900	VIT_04s0008g03920	VIT_06s0080g01260		VIT_18s0001g12520		VIT_03s0091g00040	VIT_13s0067g03600			VIT_04s0008g00300
						VIT_08s0056g01300		VIT_14s0171g00040	VIT_14s0108g00490	VIT_19s0014g03090	VIT_11s0037g00950	VIT_00s0187g00340		VIT_00s0477g00040	VIT_18s0122g00250	VIT_16s0039g01870		VIT_17s0000g02480		VIT_08s0007g02630	VIT_19s0090g00280			VIT_16s0148g00320
						VIT_01s0010g02890		VIT_12s0057g00750	VIT_01s0026g00970	VIT_17s0000g05790	VIT_13s0074g00440	VIT_01s0011g05420		VIT_11s0016g05480	VIT_00s0333g00050	VIT_19s0014g04080		VIT_05s0094g00520		VIT_16s0100g01010	VIT_14s0066g00140			VIT_09s0002g09090
						VIT_06s0004g06820		VIT_16s0100g00860	VIT_18s0089g01210	VIT_08s0007g08230	VIT_06s0009g02640	VIT_07s0005g01970		VIT_04s0008g00420	VIT_13s0019g01210	VIT_18s0001g10470		VIT_02s0236g00100		VIT_16s0100g01030	VIT_01s0011g02840			VIT_04s0044g01990
						VIT_00s0181g00020		VIT_18s0122g00880	VIT_08s0032g00700	VIT_19s0014g01360	VIT_16s0022g00830	VIT_14s0066g02350		VIT_04s0008g00310	VIT_06s0004g00980	VIT_17s0000g06710		VIT_01s0146g00370		VIT_10s0003g05450	VIT_08s0007g04180			VIT_16s0050g01900
						VIT_18s0001g12520		VIT_14s0066g02040	VIT_03s0180g00070	VIT_03s0038g03840	VIT_03s0038g00670	VIT_07s0005g00150		VIT_04s0008g00440	VIT_18s0089g00010	VIT_08s0058g01090		VIT_11s0103g00490		VIT_12s0028g03260	VIT_05s0094g01400			VIT_09s0002g02830
						VIT_11s0016g00690		VIT_04s0023g02360	VIT_17s0053g00890	VIT_11s0016g04920	VIT_03s0038g04570	VIT_17s0000g06590		VIT_11s0016g03080	VIT_10s0071g00860	VIT_19s0014g02620		VIT_19s0090g01390		VIT_02s0025g03440	VIT_17s0000g07990			VIT_16s0013g01920
						VIT_02s0025g04990		VIT_06s0009g02550	VIT_11s0065g00930	VIT_04s0008g00470	VIT_04s0043g00310	VIT_06s0004g07120		VIT_16s0098g01860	VIT_13s0156g00540	VIT_17s0053g00710		VIT_01s0127g00910		VIT_04s0044g02010	VIT_08s0007g04190			VIT_17s0000g08770
						VIT_17s0000g01360		VIT_17s0000g08170	VIT_15s0046g00980	VIT_08s0007g05580	VIT_01s0026g01240	VIT_13s0074g00570		VIT_11s0016g04180	VIT_08s0007g06950	VIT_05s0049g01200		VIT_03s0038g03980		VIT_19s0090g00190	VIT_16s0100g00520			VIT_14s0060g00450
						VIT_08s0007g07340		VIT_14s0006g03200	VIT_19s0014g03700	VIT_18s0001g08330	VIT_12s0059g00640	VIT_02s0025g03530		VIT_14s0083g01160	VIT_07s0130g00390	VIT_19s0014g04320		VIT_07s0031g00040		VIT_05s0049g00400	VIT_08s0040g00890			VIT_00s0211g00030
						VIT_17s0000g08860		VIT_17s0000g03040	VIT_10s0003g02050	VIT_00s0415g00040	VIT_16s0050g02460	VIT_11s0016g02830		VIT_07s0005g03310	VIT_17s0000g03540	VIT_08s0007g06610		VIT_09s0002g08110		VIT_17s0000g05600	VIT_00s0620g00020			VIT_16s0050g01300
						VIT_14s0006g02760		VIT_01s0011g01680	VIT_13s0067g01420	VIT_10s0071g00320	VIT_00s0304g00080	VIT_05s0020g03710		VIT_06s0004g04280	VIT_09s0002g07360	VIT_16s0148g00070		VIT_13s0074g00580		VIT_15s0021g01060	VIT_01s0011g05930			VIT_10s0092g00650
						VIT_04s0044g01240		VIT_05s0051g00340	VIT_18s0001g02060	VIT_08s0058g00680	VIT_03s0063g02490	VIT_02s0025g01720		VIT_04s0008g03810	VIT_13s0047g00510	VIT_12s0059g02540		VIT_14s0030g01700		VIT_15s0048g01530	VIT_17s0000g09740			VIT_01s0010g01660
						VIT_01s0127g00910		VIT_06s0004g03840	VIT_03s0038g02800	VIT_14s0171g00320	VIT_01s0011g00570	VIT_14s0068g01360		VIT_04s0079g00810	VIT_07s0031g00470	VIT_16s0148g00280		VIT_19s0014g01150		VIT_04s0008g01860	VIT_09s0054g01870			VIT_13s0019g01490
						VIT_07s0031g00040		VIT_11s0149g00280	VIT_08s0040g00930	VIT_08s0056g00510	VIT_13s0019g02810	VIT_15s0048g01530		VIT_07s0104g01480	VIT_01s0010g02690	VIT_10s0092g00650		VIT_18s0001g10360		VIT_08s0032g00240	VIT_17s0000g04320			VIT_14s0066g00900
						VIT_14s0030g01790		VIT_07s0005g02560	VIT_03s0180g00040	VIT_14s0108g01510	VIT_02s0025g01240	VIT_02s0025g04880		VIT_00s0194g00070	VIT_17s0000g04830	VIT_13s0019g01490		VIT_01s0011g05470		VIT_18s0001g04120	VIT_17s0000g01110			VIT_04s0008g00440
						VIT_11s0016g04260		VIT_05s0094g00200	VIT_01s0026g00710	VIT_14s0030g01790	VIT_03s0063g00050	VIT_14s0128g00680		VIT_01s0011g03520	VIT_05s0051g00930	VIT_16s0148g00210		VIT_02s0025g02490		VIT_18s0001g01280	VIT_11s0052g00950			VIT_06s0004g04820
						VIT_19s0014g03130		VIT_05s0094g00320	VIT_18s0001g09920	VIT_06s0004g07930	VIT_08s0007g01640	VIT_14s0128g00690		VIT_00s1306g00010	VIT_09s0002g03190	VIT_00s0437g00010		VIT_01s0011g03050		VIT_18s0075g00620	VIT_01s0011g05290			VIT_00s0388g00020
						VIT_07s0205g00010		VIT_00s0540g00020	VIT_07s0005g06340	VIT_05s0062g01190	VIT_19s0085g00370	VIT_14s0060g02760		VIT_02s0025g01170	VIT_06s0009g01590	VIT_00s1764g00020		VIT_17s0000g05790		VIT_11s0016g00570	VIT_11s0052g00090			VIT_04s0043g00160
						VIT_17s0000g02600		VIT_05s0020g03090	VIT_08s0056g00210	VIT_00s0357g00100	VIT_19s0085g00380	VIT_03s0063g01290		VIT_02s0025g04560	VIT_11s0016g00340	VIT_15s0046g00440		VIT_04s0008g05970		VIT_18s0075g00700	VIT_01s0146g00520			VIT_11s0052g01700
						VIT_00s0267g00030		VIT_11s0118g00220	VIT_18s0122g00550	VIT_01s0150g00480	VIT_14s0030g01900	VIT_19s0140g00120		VIT_00s1682g00010	VIT_19s0027g00490	VIT_00s0265g00100		VIT_15s0048g02630		VIT_18s0122g00690	VIT_02s0025g00710			VIT_01s0026g02270
						VIT_01s0011g04770		VIT_17s0000g01430	VIT_05s0029g00040	VIT_11s0016g00690	VIT_05s0020g03490	VIT_05s0077g00520		VIT_13s0074g00770	VIT_08s0040g03250	VIT_07s0031g00490		VIT_05s0020g02500		VIT_18s0001g00850	VIT_11s0016g04220			VIT_12s0059g01400
						VIT_05s0020g04020		VIT_06s0004g05500	VIT_03s0063g00670	VIT_00s0561g00020	VIT_14s0219g00150	VIT_07s0104g00930		VIT_10s0003g01220	VIT_13s0064g00560	VIT_18s0001g10700		VIT_07s0005g01140		VIT_18s0001g00080	VIT_03s0063g01890			VIT_01s0137g00750
						VIT_00s0804g00020		VIT_02s0025g00220	VIT_06s0061g00810	VIT_00s0586g00030	VIT_17s0000g03690	VIT_15s0048g01390		VIT_01s0026g02480	VIT_07s0005g02830	VIT_18s0001g05690		VIT_11s0016g03330		VIT_18s0075g00780	VIT_11s0103g00530			VIT_03s0088g00290
						VIT_04s0008g05970		VIT_13s0084g00150	VIT_18s0001g14170	VIT_18s0001g11120	VIT_17s0000g00280	VIT_15s0048g01350		VIT_00s0532g00070	VIT_05s0049g00100	VIT_14s0060g02150		VIT_09s0002g04580		VIT_18s0075g00540	VIT_18s0001g10240			VIT_05s0029g01490
						VIT_01s0011g03580		VIT_11s0016g05070	VIT_14s0108g00980	VIT_17s0000g08860	VIT_07s0031g01250	VIT_16s0098g00290		VIT_00s0366g00020	VIT_03s0017g00300	VIT_05s0020g01490		VIT_09s0002g05820		VIT_18s0001g01010	VIT_02s0025g00840			VIT_01s0010g02800
						VIT_08s0007g02600		VIT_11s0016g05060	VIT_01s0026g02580	VIT_08s0007g00610	VIT_08s0040g02280	VIT_08s0007g04670		VIT_00s2659g00010	VIT_10s0003g00260	VIT_03s0088g00290		VIT_19s0027g00340		VIT_01s0127g00800	VIT_13s0158g00320			VIT_18s0001g09360
						VIT_14s0108g00090		VIT_04s0008g06570	VIT_15s0021g02680	VIT_05s0020g01080	VIT_02s0154g00230	VIT_03s0097g00710		VIT_18s0122g01380	VIT_08s0007g07960	VIT_01s0011g00840		VIT_09s0018g01540		VIT_18s0075g00580	VIT_19s0014g01270			VIT_08s0007g01470
						VIT_07s0005g02710		VIT_13s0019g04190	VIT_09s0054g01220	VIT_00s0265g00060	VIT_14s0083g00110	VIT_10s0003g00390		VIT_03s0038g01320	VIT_10s0003g00040	VIT_12s0028g03920		VIT_00s0207g00140		VIT_18s0075g00630	VIT_16s0039g02270			VIT_06s0004g02850
						VIT_08s0058g01010		VIT_01s0011g01480	VIT_09s0054g01360	VIT_12s0057g00190	VIT_11s0016g05770	VIT_13s0067g01650		VIT_01s0011g05310	VIT_14s0030g01280	VIT_07s0031g00500		VIT_19s0014g01360		VIT_18s0117g00590	VIT_02s0236g00030			VIT_09s0002g04020
						VIT_15s0046g03240		VIT_07s0005g03670	VIT_17s0000g01650	VIT_02s0025g00890	VIT_18s0001g08800	VIT_05s0051g00870		VIT_01s0127g00410	VIT_14s0068g01520	VIT_15s0048g01200		VIT_00s0207g00180		VIT_00s0415g00070	VIT_05s0077g02270			VIT_10s0003g04540
						VIT_19s0027g00340		VIT_17s0000g05940	VIT_07s0104g00540	VIT_14s0060g00940	VIT_19s0014g00080	VIT_10s0003g04470		VIT_18s0001g05680	VIT_06s0004g08480	VIT_00s0204g00120		VIT_00s0541g00010		VIT_16s0098g00600	VIT_01s0011g04140			VIT_05s0020g00440
						VIT_08s0007g07320		VIT_01s0011g02860	VIT_04s0008g01100	VIT_09s0054g01000	VIT_13s0067g00660	VIT_01s0026g02400		VIT_05s0049g00960	VIT_14s0006g02290	VIT_03s0110g00370		VIT_00s0357g00100		VIT_17s0000g00640	VIT_19s0015g01210			VIT_06s0009g00480
						VIT_03s0038g03260		VIT_04s0008g02100	VIT_04s0008g02960	VIT_04s0008g05860	VIT_09s0002g05990	VIT_05s0049g01070		VIT_07s0104g00310	VIT_11s0016g02890	VIT_03s0038g02520		VIT_07s0031g01630		VIT_18s0001g09630	VIT_03s0063g00960			VIT_19s0014g01720
						VIT_13s0019g02730		VIT_11s0078g00290	VIT_18s0076g00340	VIT_14s0060g00980	VIT_04s0008g02670	VIT_19s0093g00110		VIT_14s0108g00490	VIT_11s0016g02430	VIT_13s0067g00220		VIT_02s0012g00890		VIT_17s0000g00650	VIT_01s0011g01880			VIT_13s0084g00090
						VIT_11s0103g00520		VIT_14s0066g01150	VIT_17s0000g09610	VIT_12s0028g01710	VIT_04s0023g02020	VIT_19s0093g00400		VIT_18s0089g01210	VIT_09s0002g02420	VIT_09s0002g04020		VIT_08s0007g03780		VIT_08s0007g08020	VIT_11s0016g04870			VIT_14s0066g01650
						VIT_18s0001g15000		VIT_02s0012g01570	VIT_18s0001g12200	VIT_00s0256g00050	VIT_10s0003g04040	VIT_19s0093g00320		VIT_08s0056g01300	VIT_06s0009g02710	VIT_06s0004g03700		VIT_14s0006g02490		VIT_14s0083g00250	VIT_02s0012g00930			VIT_01s0026g00530
						VIT_07s0129g00930		VIT_13s0064g00270	VIT_19s0015g02910	VIT_11s0016g00820	VIT_04s0008g04290	VIT_19s0093g00350		VIT_07s0095g00670	VIT_13s0019g01890	VIT_14s0171g00400		VIT_01s0010g00760		VIT_05s0049g00520	VIT_00s0261g00010			VIT_01s0150g00170
						VIT_09s0054g01000		VIT_00s0615g00020	VIT_00s0389g00040	VIT_08s0007g08240	VIT_09s0070g00060	VIT_19s0015g02730		VIT_08s0007g08230	VIT_19s0014g02500	VIT_13s0074g00550		VIT_04s0008g04810		VIT_14s0083g00290	VIT_02s0025g01690			VIT_01s0137g00480
						VIT_04s0008g05860		VIT_13s0067g00680	VIT_00s0389g00030	VIT_05s0124g00100	VIT_18s0001g10210	VIT_19s0093g00390		VIT_05s0020g04950	VIT_01s0011g05480	VIT_01s0026g02500		VIT_15s0048g00650		VIT_08s0007g08000	VIT_08s0007g03840			VIT_05s0020g03350
						VIT_19s0014g01360		VIT_07s0129g01030	VIT_19s0135g00180	VIT_02s0025g04200	VIT_11s0016g02550	VIT_19s0015g02680		VIT_07s0005g02120	VIT_00s0333g00040	VIT_09s0002g05810		VIT_07s0141g00600		VIT_15s0046g01360	VIT_11s0016g02490			VIT_04s0008g06850
						VIT_18s0089g00920		VIT_03s0017g01690	VIT_19s0135g00190	VIT_18s0001g08340	VIT_02s0025g02140	VIT_19s0015g02890		VIT_15s0046g00980	VIT_05s0029g00480	VIT_19s0014g01720		VIT_04s0008g06730		VIT_05s0094g00160	VIT_15s0021g02760			VIT_19s0090g00060
						VIT_19s0090g00510		VIT_01s0137g00190	VIT_17s0000g03270	VIT_01s0011g03360	VIT_08s0007g00130	VIT_05s0049g01100		VIT_16s0050g02560	VIT_13s0156g00120	VIT_14s0128g00240				VIT_12s0057g00950	VIT_02s0012g02540			VIT_08s0007g07630
						VIT_02s0025g00080		VIT_17s0000g07030	VIT_15s0048g02900	VIT_07s0205g00010	VIT_13s0019g01430	VIT_16s0039g01070		VIT_00s0194g00280	VIT_04s0008g01000	VIT_08s0007g06760				VIT_06s0009g00130	VIT_08s0007g01650			VIT_00s0304g00020
						VIT_14s0060g01420		VIT_14s0006g02140	VIT_02s0025g02570	VIT_16s0100g00740	VIT_17s0000g03310	VIT_08s0040g00920		VIT_18s0001g07220	VIT_04s0008g05470	VIT_14s0068g02190				VIT_18s0001g09680	VIT_06s0009g02530			VIT_01s0127g00070
						VIT_11s0016g03760		VIT_18s0001g06760	VIT_18s0001g09650	VIT_17s0000g04860	VIT_17s0000g10280	VIT_05s0049g01120		VIT_18s0001g09160	VIT_12s0028g00940	VIT_18s0001g03160				VIT_06s0004g01990	VIT_09s0002g06980			VIT_05s0020g02260
						VIT_13s0019g03610		VIT_00s0370g00020	VIT_18s0001g11470	VIT_17s0000g01120	VIT_04s0008g03560	VIT_05s0049g01090		VIT_17s0000g01810	VIT_05s0020g04110	VIT_11s0103g00010				VIT_08s0007g08010	VIT_14s0060g02270			VIT_18s0001g05570
						VIT_17s0000g04860		VIT_04s0008g00440	VIT_18s0001g00030	VIT_07s0031g00660	VIT_19s0015g01220	VIT_07s0005g04890		VIT_05s0020g03060	VIT_08s0040g02330	VIT_11s0103g00050				VIT_09s0002g02950	VIT_14s0060g00990			VIT_00s0225g00060
						VIT_14s0006g02490		VIT_11s0016g03080	VIT_08s0007g07740	VIT_12s0059g01300	VIT_06s0061g00270	VIT_07s0005g00010		VIT_15s0021g01280	VIT_06s0004g03220	VIT_00s0125g00190				VIT_12s0028g03120	VIT_09s0002g01540			VIT_00s0225g00080
						VIT_11s0065g01070		VIT_11s0016g01760	VIT_14s0068g02120	VIT_16s0098g01750	VIT_06s0004g00240	VIT_07s0005g00030		VIT_09s0054g01360	VIT_06s0004g03240	VIT_14s0219g00130				VIT_05s0049g00840	VIT_08s0007g00710			VIT_08s0007g04550
						VIT_08s0040g01930		VIT_16s0050g00030	VIT_04s0023g00080	VIT_18s0001g09980	VIT_06s0080g01230	VIT_19s0093g00310		VIT_05s0062g01270	VIT_17s0000g01540	VIT_08s0007g01810				VIT_00s0187g00010	VIT_11s0016g02630			VIT_03s0091g01050
						VIT_14s0108g00930		VIT_18s0001g01800	VIT_18s0041g00390	VIT_15s0021g01550	VIT_01s0011g04820	VIT_00s0240g00050		VIT_04s0008g01450	VIT_16s0098g01840	VIT_17s0119g00080				VIT_05s0020g04990	VIT_16s0022g01870			VIT_06s0061g01310
						VIT_07s0141g00600		VIT_18s0117g00280	VIT_08s0040g00770	VIT_18s0001g13080	VIT_18s0001g14440	VIT_06s0004g05700		VIT_07s0104g00540	VIT_18s0001g14950	VIT_11s0118g00710				VIT_00s0187g00020	VIT_18s0001g09130			VIT_15s0048g00190
						VIT_18s0001g05840		VIT_18s0117g00300	VIT_13s0084g00050	VIT_09s0002g05170	VIT_10s0003g00260	VIT_08s0007g01410		VIT_17s0000g09540	VIT_07s0031g01360	VIT_05s0020g03140				VIT_17s0000g00680	VIT_18s0001g08820			VIT_01s0182g00140
						VIT_15s0024g00820		VIT_09s0002g04720	VIT_04s0008g06870	VIT_14s0108g00840	VIT_01s0010g03640	VIT_08s0007g01400		VIT_17s0000g09550	VIT_18s0001g14040	VIT_05s0020g02170				VIT_18s0001g06560	VIT_18s0001g05790			VIT_11s0016g05330
								VIT_18s0117g00290	VIT_01s0011g06240	VIT_10s0003g03250	VIT_19s0090g01190	VIT_00s0153g00050		VIT_13s0067g00110	VIT_02s0025g01380	VIT_07s0031g02270				VIT_12s0055g00380	VIT_05s0020g04870			VIT_05s0049g01550
								VIT_08s0056g00810	VIT_01s0011g02840	VIT_00s0360g00020	VIT_00s0958g00020	VIT_12s0028g00930		VIT_19s0015g02500	VIT_12s0059g01250	VIT_02s0012g01250				VIT_16s0039g02430	VIT_06s0004g07880			VIT_11s0016g05170
								VIT_07s0005g00460	VIT_12s0028g00530	VIT_11s0016g05430	VIT_04s0008g01500	VIT_12s0028g00920		VIT_19s0015g02910	VIT_07s0005g00740	VIT_02s0025g04420				VIT_13s0019g03520	VIT_12s0028g03600			VIT_18s0041g00520
								VIT_07s0104g01360	VIT_10s0003g05370	VIT_02s0025g01300	VIT_13s0019g02930	VIT_08s0040g03040		VIT_19s0135g00230	VIT_19s0090g01050	VIT_08s0056g00780				VIT_09s0054g00570	VIT_18s0072g00150			VIT_09s0002g04130
								VIT_02s0025g01170	VIT_12s0134g00510	VIT_08s0007g07340	VIT_13s0019g02740	VIT_08s0040g03100		VIT_00s0389g00030	VIT_03s0038g00430	VIT_16s0098g01250				VIT_16s0013g02160	VIT_17s0000g03680			VIT_01s0026g01570
								VIT_12s0121g00080	VIT_18s0001g11370	VIT_14s0006g02760	VIT_04s0008g01490	VIT_14s0060g02170		VIT_19s0015g02750	VIT_17s0000g04540	VIT_01s0011g02520				VIT_12s0034g01880	VIT_15s0046g01650			VIT_15s0021g00330
								VIT_14s0030g00600	VIT_00s0438g00010	VIT_11s0037g00810	VIT_13s0019g03170	VIT_14s0030g00030		VIT_19s0027g00040	VIT_06s0004g01310	VIT_05s0049g01410				VIT_06s0004g02010	VIT_14s0081g00710			VIT_02s0033g01370
								VIT_05s0020g03280	VIT_19s0014g02730	VIT_03s0038g03980	VIT_06s0004g08200	VIT_07s0005g00260		VIT_19s0015g02780	VIT_06s0004g05050	VIT_17s0000g05550				VIT_02s0025g01320	VIT_09s0002g06810			VIT_02s0154g00080
								VIT_05s0020g03320	VIT_00s0252g00040	VIT_18s0001g10360	VIT_17s0000g09370	VIT_16s0022g00540		VIT_19s0135g00190	VIT_09s0002g08960	VIT_13s0067g03200				VIT_05s0049g00780	VIT_01s0010g00940			VIT_07s0151g00740
								VIT_16s0098g00800	VIT_01s0244g00170	VIT_13s0019g05150	VIT_14s0108g01500	VIT_19s0090g01490		VIT_19s0015g02940	VIT_07s0141g00690	VIT_03s0017g02170				VIT_19s0015g00490	VIT_04s0023g01110			VIT_11s0016g05840
								VIT_07s0129g01040	VIT_18s0089g00610	VIT_06s0004g06910	VIT_13s0019g04710	VIT_00s2563g00010		VIT_19s0027g00030	VIT_19s0090g01080	VIT_11s0037g00420				VIT_05s0049g00770	VIT_05s0020g00080			VIT_05s0020g03740
								VIT_12s0142g00420	VIT_17s0000g08950	VIT_06s0080g00760	VIT_06s0004g06550	VIT_02s0025g00580		VIT_19s0015g02660	VIT_16s0022g02030	VIT_03s0038g04600				VIT_10s0003g03410	VIT_04s0023g00770			VIT_02s0154g00310
								VIT_03s0017g02330	VIT_08s0058g00810	VIT_08s0007g02600	VIT_16s0050g00020	VIT_07s0005g00410		VIT_15s0048g01540	VIT_01s0011g05590	VIT_18s0001g14840				VIT_05s0124g00080	VIT_01s0026g02480			VIT_05s0020g03750
								VIT_08s0040g01920	VIT_10s0116g00780	VIT_07s0005g02710	VIT_09s0054g01010	VIT_05s0077g01280		VIT_18s0001g09650	VIT_09s0002g05730	VIT_18s0001g07230				VIT_18s0001g03520	VIT_15s0046g01340			VIT_14s0068g00820
								VIT_12s0059g02540	VIT_07s0129g01060	VIT_15s0046g03240	VIT_11s0103g00550	VIT_08s0007g05100		VIT_18s0001g11580	VIT_06s0080g00320	VIT_11s0016g04690				VIT_15s0048g02370	VIT_18s0001g06070			VIT_14s0006g02530
								VIT_03s0017g01550	VIT_01s0127g00600	VIT_19s0027g00340	VIT_02s0033g01020	VIT_13s0067g01890		VIT_18s0001g11470	VIT_08s0007g07140	VIT_19s0090g01470				VIT_14s0066g00680	VIT_00s0337g00040			VIT_07s0151g00760
								VIT_00s2659g00010	VIT_03s0063g01930	VIT_02s0241g00100	VIT_02s0033g01060	VIT_07s0005g01980		VIT_03s0063g01560	VIT_11s0016g03560	VIT_10s0003g02540				VIT_06s0004g03330	VIT_03s0038g03970			VIT_06s0009g01420
								VIT_12s0059g02580	VIT_13s0019g04310	VIT_00s0207g00180	VIT_02s0033g01030	VIT_01s0026g00980		VIT_18s0001g11490	VIT_09s0002g04120	VIT_09s0002g05590				VIT_19s0027g01120	VIT_04s0023g01090			VIT_05s0020g03730
								VIT_00s2485g00010	VIT_07s0031g00650	VIT_19s0090g00510	VIT_02s0033g01000	VIT_08s0007g08840		VIT_15s0048g01700	VIT_18s0001g12970	VIT_11s0052g00540				VIT_03s0088g01240	VIT_02s0033g01160			VIT_13s0320g00050
								VIT_06s0009g02170	VIT_14s0060g01550	VIT_02s0025g00080	VIT_15s0046g01190	VIT_18s0001g13670		VIT_18s0001g00030	VIT_00s0662g00040	VIT_09s0002g05570				VIT_14s0128g00110	VIT_00s1206g00020			VIT_16s0050g01620
								VIT_19s0085g01200	VIT_08s0007g05880	VIT_11s0016g03760	VIT_02s0012g01570	VIT_17s0119g00110		VIT_04s0023g02650	VIT_04s0008g05440	VIT_07s0005g02000				VIT_03s0038g04760	VIT_18s0001g05830			VIT_04s0008g04230
								VIT_05s0020g04180	VIT_13s0067g02130	VIT_11s0037g00390	VIT_01s0137g00550	VIT_03s0017g00650		VIT_08s0040g00820	VIT_13s0047g00340	VIT_06s0004g04590				VIT_05s0029g00390	VIT_18s0001g08340			VIT_10s0003g04470
								VIT_08s0007g03910	VIT_13s0067g01960	VIT_18s0122g00290	VIT_10s0092g00370	VIT_14s0006g01250		VIT_07s0141g00890	VIT_06s0004g06110	VIT_18s0117g00300				VIT_11s0016g02070	VIT_07s0130g00480			VIT_19s0015g00060
								VIT_00s0169g00040	VIT_08s0007g08150	VIT_01s0026g00960	VIT_15s0048g01490	VIT_04s0008g02460		VIT_07s0141g00920	VIT_08s0056g01140	VIT_18s0117g00290				VIT_17s0000g03550	VIT_01s0011g00850			VIT_13s0067g03750
								VIT_06s0004g01890	VIT_04s0023g02790	VIT_07s0151g00930	VIT_00s0389g00040	VIT_01s0011g03020		VIT_04s0023g00080	VIT_05s0062g00960	VIT_08s0040g02730				VIT_19s0014g01780	VIT_14s0006g02910			VIT_06s0009g03380
								VIT_08s0007g03650	VIT_02s0025g03200	VIT_18s0001g05580	VIT_17s0000g06280	VIT_19s0014g02480		VIT_06s0004g06710	VIT_11s0016g03370	VIT_11s0016g01440				VIT_05s0077g01140	VIT_16s0013g00040			VIT_08s0040g02840
								VIT_07s0104g01590	VIT_14s0006g00630	VIT_04s0023g02930	VIT_11s0016g02350	VIT_05s0020g03190		VIT_06s0009g02230	VIT_11s0016g03380	VIT_01s0026g02140				VIT_08s0007g06160	VIT_04s0023g00880			VIT_19s0014g01540
								VIT_10s0003g01390	VIT_00s0317g00050	VIT_07s0031g00770	VIT_09s0054g01520	VIT_08s0007g02360		VIT_18s0041g00390	VIT_01s0026g02620	VIT_12s0035g01210				VIT_00s0541g00020	VIT_18s0001g09070			VIT_09s0002g05570
								VIT_18s0001g06320	VIT_01s0011g05260	VIT_18s0001g14410	VIT_03s0063g00670	VIT_04s0069g01010		VIT_08s0040g00770	VIT_13s0158g00320	VIT_07s0031g01160				VIT_14s0066g01860	VIT_10s0003g00530			VIT_06s0004g04590
								VIT_19s0014g04170	VIT_19s0085g00540	VIT_15s0046g03310	VIT_07s0031g00800	VIT_06s0009g01620		VIT_03s0180g00010	VIT_08s0040g01970	VIT_11s0103g00380				VIT_14s0006g02730	VIT_11s0016g05430			VIT_09s0002g04720
								VIT_19s0014g01370	VIT_07s0005g01500	VIT_18s0001g10480	VIT_06s0004g05230	VIT_04s0008g01520		VIT_14s0030g01560	VIT_08s0056g00980	VIT_01s0011g02480				VIT_13s0067g01070	VIT_06s0004g04350			VIT_00s0404g00040
								VIT_19s0014g01150	VIT_08s0007g03930	VIT_05s0020g03340	VIT_07s0141g00690	VIT_12s0035g01910		VIT_14s0030g01550	VIT_05s0077g00570	VIT_12s0028g00530				VIT_05s0020g03880	VIT_02s0025g01300			VIT_09s0018g02010
								VIT_19s0014g01360	VIT_17s0000g05800	VIT_19s0014g02710	VIT_07s0005g03190	VIT_00s0194g00030		VIT_17s0000g08770	VIT_15s0021g02660	VIT_09s0002g01300				VIT_18s0001g06550	VIT_07s0031g02040			VIT_05s0020g01980
								VIT_08s0032g00710	VIT_04s0008g01210	VIT_00s0533g00010	VIT_00s0662g00040	VIT_02s0025g00280		VIT_01s0127g00130	VIT_09s0054g00610	VIT_00s0125g00020				VIT_18s0072g00830	VIT_16s0100g01230			VIT_18s0001g14440
								VIT_03s0063g00700	VIT_17s0000g06970	VIT_15s0046g01660	VIT_11s0016g00670	VIT_13s0019g03090		VIT_01s0011g05350	VIT_16s0013g02090	VIT_12s0059g01780				VIT_02s0033g00300	VIT_07s0005g02450			VIT_09s0018g00620
								VIT_08s0032g00510	VIT_01s0011g04950	VIT_00s0203g00180	VIT_16s0100g00400	VIT_02s0154g00480		VIT_12s0035g01350	VIT_08s0032g00150	VIT_14s0060g01990				VIT_12s0028g00980	VIT_16s0039g02660			VIT_12s0028g02240
								VIT_18s0001g07220	VIT_11s0149g00120	VIT_10s0003g01070	VIT_16s0013g00990	VIT_12s0028g01410		VIT_13s0064g00450	VIT_02s0025g00830	VIT_07s0141g00360				VIT_05s0020g03710	VIT_00s0179g00360			VIT_18s0001g04800
								VIT_17s0000g01810	VIT_17s0000g06780	VIT_02s0025g04990	VIT_16s0013g01050	VIT_10s0597g00050		VIT_10s0003g05380	VIT_00s0391g00040	VIT_02s0012g00290				VIT_11s0016g01160	VIT_18s0001g15360			VIT_07s0031g01160
								VIT_05s0020g03070	VIT_00s0333g00050	VIT_07s0005g01250	VIT_01s0011g03470	VIT_16s0100g00720		VIT_19s0014g03850	VIT_06s0009g02700	VIT_18s0001g06150				VIT_02s0025g04000	VIT_07s0005g00270			VIT_15s0045g01140
								VIT_05s0020g03060	VIT_08s0007g06910	VIT_12s0059g01640	VIT_12s0028g03270	VIT_08s0007g08750		VIT_03s0017g00940	VIT_00s2668g00010	VIT_10s0003g05380				VIT_06s0004g04970	VIT_14s0068g00300			VIT_01s0011g02480
								VIT_05s0062g01270	VIT_08s0007g06990	VIT_07s0031g00040	VIT_04s0008g02230	VIT_16s0050g01250		VIT_19s0014g03530	VIT_07s0129g01000	VIT_10s0003g02110				VIT_02s0025g01220	VIT_09s0054g01750			VIT_18s0075g00520
								VIT_16s0050g00480	VIT_03s0038g02050	VIT_13s0019g01040	VIT_11s0016g03350	VIT_02s0025g00350		VIT_19s0014g02730	VIT_18s0001g02630	VIT_09s0002g00540				VIT_10s0116g00960	VIT_07s0104g00590			VIT_15s0048g02230
								VIT_06s0004g06480	VIT_04s0023g02870	VIT_11s0016g03410	VIT_02s0012g00570	VIT_08s0040g01370		VIT_18s0001g13790	VIT_19s0090g00800	VIT_16s0050g01190				VIT_18s0001g11170	VIT_06s0004g06290			VIT_12s0034g01160
								VIT_15s0021g01060	VIT_19s0027g01690	VIT_06s0061g00680	VIT_09s0002g05160	VIT_11s0149g00050		VIT_04s0008g01880	VIT_07s0141g00330	VIT_08s0007g00470				VIT_19s0015g01280	VIT_07s0129g00370			VIT_11s0037g00860
								VIT_02s0025g04890	VIT_08s0007g07000	VIT_00s0804g00020	VIT_07s0141g00270	VIT_11s0103g00050		VIT_14s0068g01160	VIT_07s0005g05660	VIT_17s0000g07090				VIT_05s0049g01020	VIT_18s0001g03830			VIT_18s0001g15240
								VIT_18s0001g11500	VIT_08s0007g06950	VIT_14s0083g00080	VIT_17s0000g04790	VIT_11s0103g00040		VIT_01s0244g00170	VIT_01s0011g00280	VIT_09s0002g00360				VIT_19s0014g03820	VIT_04s0023g03880			VIT_06s0080g00320
								VIT_04s0044g01610	VIT_08s0007g06960	VIT_09s0002g01060	VIT_07s0005g05100	VIT_13s0067g01780		VIT_10s0003g02730	VIT_13s0147g00110	VIT_18s0001g06020				VIT_08s0007g05030	VIT_12s0034g01370			VIT_16s0022g01430
								VIT_12s0035g00610	VIT_08s0007g06900	VIT_08s0056g00430	VIT_03s0063g00310	VIT_19s0014g02110		VIT_08s0007g06260	VIT_14s0066g00380	VIT_03s0063g01790				VIT_00s1352g00010	VIT_14s0068g01020			VIT_18s0001g02820
								VIT_16s0100g00600	VIT_04s0079g00800	VIT_13s0019g02730	VIT_06s0004g05460	VIT_15s0048g02870		VIT_17s0053g00570	VIT_19s0014g03520	VIT_08s0040g01200				VIT_04s0008g00620	VIT_02s0025g01530			VIT_16s0050g00140
								VIT_16s0039g01060	VIT_05s0020g04630	VIT_07s0129g00930	VIT_00s0533g00020	VIT_05s0020g03860		VIT_13s0019g01130	VIT_07s0141g00720	VIT_12s0028g01770				VIT_18s0001g08470	VIT_09s0054g01590			VIT_14s0006g01610
								VIT_16s0039g00860	VIT_18s0001g09100	VIT_08s0040g03310	VIT_09s0002g04340	VIT_04s0008g02050		VIT_19s0085g00350	VIT_08s0007g05160	VIT_07s0005g06290				VIT_11s0016g02780	VIT_01s0026g01470			VIT_18s0001g09400
								VIT_06s0080g00090	VIT_01s0010g00610	VIT_07s0031g01630	VIT_04s0008g01110	VIT_13s0067g00700		VIT_14s0066g01020	VIT_17s0000g07210	VIT_10s0116g01040				VIT_08s0056g01190	VIT_03s0063g00650			VIT_06s0004g01670
								VIT_07s0141g00890	VIT_13s0047g00510	VIT_08s0056g00740	VIT_10s0597g00050	VIT_12s0059g01060		VIT_05s0020g01130	VIT_05s0094g01190	VIT_10s0116g01140				VIT_06s0004g00020	VIT_09s0002g06770			VIT_15s0045g00380
								VIT_14s0006g01680	VIT_14s0006g02210	VIT_02s0025g02670	VIT_00s0179g00150	VIT_11s0037g00440		VIT_17s0000g03030	VIT_11s0016g00980	VIT_03s0038g03860				VIT_01s0026g02710	VIT_06s0004g08380			VIT_16s0050g00750
								VIT_08s0007g04120	VIT_07s0031g00470	VIT_05s0020g01830	VIT_11s0016g03940	VIT_06s0009g02640		VIT_07s0005g00980	VIT_17s0000g07200	VIT_01s0010g02450				VIT_17s0000g00770	VIT_16s0039g00150			VIT_19s0090g01160
								VIT_06s0004g06710	VIT_16s0039g00730	VIT_18s0001g08870	VIT_11s0016g04080	VIT_02s0025g03290		VIT_13s0019g01660	VIT_18s0001g03510	VIT_02s0025g00140				VIT_12s0028g00860	VIT_02s0025g04710			VIT_08s0007g00470
								VIT_19s0015g00380	VIT_06s0061g01610	VIT_13s0064g01510	VIT_04s0079g00410	VIT_09s0002g01890		VIT_18s0001g05800	VIT_18s0001g03470	VIT_18s0001g06170				VIT_04s0044g00060	VIT_11s0016g03410			VIT_09s0002g04160
								VIT_14s0108g01110	VIT_03s0091g00860	VIT_15s0024g00820	VIT_18s0001g02540	VIT_00s0480g00020		VIT_14s0006g00630	VIT_18s0001g14310	VIT_14s0030g00970				VIT_14s0068g01780	VIT_13s0064g01080			VIT_18s0001g10420
								VIT_10s0003g01360	VIT_15s0048g01040	VIT_03s0091g01090	VIT_15s0048g02540	VIT_07s0031g01160		VIT_12s0059g01150	VIT_04s0023g03370	VIT_16s0098g00460				VIT_10s0116g00080	VIT_13s0019g03940			VIT_18s0001g06020
								VIT_07s0031g00050	VIT_09s0002g05100	VIT_04s0008g04810	VIT_16s0050g02520	VIT_01s0026g00820		VIT_15s0046g01680	VIT_08s0007g01640	VIT_12s0059g01080				VIT_18s0001g13420	VIT_16s0100g00740			VIT_17s0000g10060
								VIT_03s0180g00010	VIT_18s0001g02370	VIT_07s0141g00600	VIT_16s0039g00660	VIT_11s0016g02700		VIT_11s0016g01240	VIT_05s0102g00710	VIT_16s0050g00080				VIT_18s0117g00340	VIT_18s0072g00100			VIT_08s0040g01200
								VIT_00s0409g00040	VIT_05s0062g00860	VIT_18s0001g05840	VIT_07s0005g06670	VIT_01s0011g03660		VIT_12s0178g00040	VIT_18s0089g01230	VIT_03s0091g01130				VIT_17s0000g01280	VIT_17s0000g05650			VIT_14s0006g01120
								VIT_01s0127g00160	VIT_13s0064g00560	VIT_08s0056g01300	VIT_05s0094g00360	VIT_18s0001g08320		VIT_15s0024g00050	VIT_14s0068g01230	VIT_07s0031g00880				VIT_07s0005g02570	VIT_17s0000g05250			VIT_12s0028g03190
								VIT_04s0079g00020	VIT_19s0090g00610	VIT_18s0001g08810	VIT_01s0011g05670	VIT_14s0060g02440		VIT_12s0028g02430	VIT_08s0007g03830	VIT_19s0014g03090				VIT_04s0008g05750	VIT_07s0005g01080			VIT_15s0046g00080
								VIT_17s0000g08770	VIT_02s0025g03580	VIT_13s0019g03610	VIT_01s0150g00320	VIT_14s0068g00500		VIT_17s0000g06970	VIT_01s0011g04350	VIT_18s0001g00160				VIT_07s0031g01710	VIT_08s0007g02330			VIT_10s0116g01040
								VIT_01s0011g05350	VIT_19s0027g00750	VIT_05s0094g01530	VIT_01s0026g01340	VIT_08s0040g01520		VIT_07s0031g02840	VIT_11s0016g02170	VIT_08s0007g07390				VIT_15s0046g01140	VIT_02s0012g01220			VIT_14s0083g00840
								VIT_01s0011g00210	VIT_17s0000g00710	VIT_06s0004g00070	VIT_19s0093g00310	VIT_03s0180g00320		VIT_18s0041g00350	VIT_17s0000g06440	VIT_02s0025g01070				VIT_19s0090g00840	VIT_04s0008g05960			VIT_18s0001g06140
								VIT_01s0026g00430	VIT_14s0066g01340	VIT_09s0002g00810	VIT_07s0005g00010	VIT_03s0180g00280		VIT_16s0100g00480	VIT_04s0023g01120	VIT_15s0021g02050				VIT_10s0116g01200	VIT_06s0004g08310			VIT_18s0001g02780
								VIT_00s0590g00010	VIT_17s0000g00720	VIT_19s0014g01470	VIT_06s0004g03550	VIT_07s0104g00800		VIT_13s0019g02390	VIT_17s0000g01240	VIT_05s0062g01190				VIT_08s0058g01390	VIT_00s0301g00040			VIT_01s0137g00180
								VIT_13s0067g03810	VIT_10s0003g00190	VIT_12s0028g02240	VIT_19s0015g01090	VIT_05s0049g00940		VIT_06s0009g02790	VIT_01s0010g02030	VIT_00s0561g00020				VIT_02s0025g00420	VIT_04s0043g00360			VIT_03s0038g03860
								VIT_16s0039g02250	VIT_01s0010g02420	VIT_07s0031g01160	VIT_00s0194g00030	VIT_08s0007g03690		VIT_19s0015g01900	VIT_14s0108g00740	VIT_00s0274g00060				VIT_10s0003g02810	VIT_01s0011g05680			VIT_17s0000g06290
								VIT_19s0015g01340	VIT_14s0171g00450	VIT_08s0007g01480	VIT_12s0057g00670	VIT_02s0012g00550		VIT_16s0098g01880	VIT_14s0060g01520	VIT_14s0060g01850				VIT_09s0018g00240	VIT_12s0034g01330			VIT_01s0011g01920
								VIT_15s0048g00970	VIT_13s0064g01260	VIT_09s0018g01920	VIT_11s0052g01650	VIT_01s0011g06310		VIT_06s0004g01000	VIT_05s0077g01450	VIT_14s0060g01830				VIT_02s0025g01280	VIT_05s0077g02100			VIT_10s0003g04090
								VIT_03s0038g03420	VIT_14s0030g01720	VIT_07s0031g00030	VIT_17s0000g01630	VIT_10s0003g03930		VIT_17s0000g04880	VIT_04s0023g01840	VIT_09s0002g02960				VIT_03s0038g00340	VIT_09s0002g00420			VIT_18s0001g06170
								VIT_18s0001g00210	VIT_00s0194g00020	VIT_00s0477g00040	VIT_03s0063g00380	VIT_07s0031g00920		VIT_16s0050g01950	VIT_11s0016g01160	VIT_18s0001g00840				VIT_01s0026g02470	VIT_08s0040g00620			VIT_07s0031g00610
								VIT_02s0025g00400	VIT_08s0007g05540	VIT_11s0016g02720	VIT_10s0003g03750	VIT_04s0044g01100		VIT_11s0118g00080	VIT_08s0007g05900	VIT_08s0007g03680				VIT_12s0059g01370	VIT_13s0019g01510			VIT_13s0067g01890
								VIT_18s0001g09890	VIT_16s0100g00530	VIT_07s0005g03720	VIT_19s0093g00550	VIT_18s0122g00970		VIT_13s0158g00440	VIT_18s0041g01220	VIT_19s0090g01530				VIT_02s0025g01430	VIT_03s0038g01510			VIT_07s0255g00030
								VIT_17s0000g04890	VIT_05s0020g04760	VIT_06s0004g00480	VIT_08s0007g08540	VIT_03s0038g00360		VIT_03s0017g00610	VIT_13s0019g04540	VIT_18s0072g01130				VIT_12s0028g02530	VIT_06s0004g08460			VIT_01s0137g00700
								VIT_08s0007g06620	VIT_05s0077g01170	VIT_10s0003g04990	VIT_13s0019g04300	VIT_04s0079g00530		VIT_17s0000g07400	VIT_14s0068g02040	VIT_04s0023g00360				VIT_01s0011g04080	VIT_03s0063g02530			VIT_11s0016g02110
								VIT_04s0008g05330	VIT_03s0038g04420	VIT_08s0040g00010	VIT_16s0022g02310	VIT_10s0003g00480		VIT_15s0045g00440	VIT_05s0020g04510	VIT_12s0035g01030				VIT_14s0128g00120	VIT_11s0037g00850			VIT_00s0317g00110
								VIT_17s0000g04310	VIT_05s0029g00500	VIT_11s0016g03140	VIT_03s0038g03450	VIT_10s0003g00470		VIT_00s0487g00010	VIT_14s0030g02180	VIT_14s0006g02800				VIT_07s0005g02580	VIT_02s0154g00040			VIT_14s0081g00550
								VIT_13s0156g00070	VIT_13s0073g00560	VIT_05s0029g01490	VIT_16s0098g01150	VIT_19s0090g01250		VIT_07s0197g00130	VIT_16s0022g00370	VIT_10s0071g00300				VIT_13s0019g02020	VIT_02s0025g02820			VIT_18s0001g14810
								VIT_19s0085g00510	VIT_14s0030g00640	VIT_19s0014g05330	VIT_03s0063g01180	VIT_11s0016g00710		VIT_13s0064g00830	VIT_15s0048g01490	VIT_01s0011g02390				VIT_02s0025g04290	VIT_03s0063g00850			VIT_06s0080g00120
								VIT_11s0016g00630	VIT_10s0003g00260	VIT_08s0040g02760	VIT_18s0001g06690	VIT_14s0068g02150		VIT_15s0045g00810	VIT_05s0020g01240	VIT_13s0073g00590				VIT_18s0001g11930	VIT_02s0025g00230			VIT_14s0066g01570
								VIT_09s0002g08120	VIT_01s0026g01450	VIT_18s0001g09460	VIT_10s0116g00410	VIT_05s0094g01590		VIT_19s0027g01690	VIT_17s0000g06280	VIT_14s0060g01840				VIT_02s0025g04330	VIT_08s0040g03130			VIT_18s0001g05840
								VIT_14s0108g00500	VIT_09s0002g00690	VIT_14s0066g01790	VIT_11s0052g01800	VIT_01s0026g02080		VIT_04s0079g00800	VIT_18s0001g06690	VIT_09s0002g02970				VIT_18s0001g15660	VIT_02s0025g01520			VIT_18s0122g00290
								VIT_18s0001g10460	VIT_08s0217g00090	VIT_17s0000g06210	VIT_17s0000g03740	VIT_01s0127g00250		VIT_05s0020g04630	VIT_15s0048g01320	VIT_15s0024g00410				VIT_11s0016g03140	VIT_00s0211g00130			VIT_13s0067g00240
								VIT_08s0007g01790	VIT_06s0004g03420	VIT_05s0029g00870	VIT_07s0104g01120	VIT_08s0007g07120		VIT_00s1916g00010	VIT_19s0177g00030	VIT_18s0117g00320				VIT_02s0033g01120	VIT_15s0048g02780			VIT_15s0021g02050
								VIT_14s0108g01420	VIT_14s0060g01720	VIT_09s0002g06210	VIT_06s0009g03550	VIT_04s0008g06130		VIT_10s0116g00700	VIT_09s0002g05270	VIT_18s0001g15230				VIT_02s0025g04250	VIT_10s0003g01130			VIT_14s0219g00110
								VIT_12s0059g00280	VIT_18s0041g00370	VIT_19s0027g01740	VIT_12s0057g00980	VIT_18s0001g01280		VIT_01s0010g00020	VIT_15s0048g01390	VIT_19s0090g00960				VIT_02s0025g04260	VIT_09s0002g01520			VIT_14s0083g00370
								VIT_18s0001g05800	VIT_08s0040g01330	VIT_09s0002g03870	VIT_15s0046g01310	VIT_18s0075g00700		VIT_18s0001g07380	VIT_15s0046g02560	VIT_14s0060g01780				VIT_09s0002g06890	VIT_18s0001g08060			VIT_02s0012g01590
								VIT_14s0030g00670	VIT_08s0040g01300	VIT_07s0129g00310	VIT_08s0040g00680	VIT_18s0122g00690		VIT_19s0177g00280	VIT_09s0002g04340	VIT_03s0038g01340				VIT_05s0049g01420	VIT_18s0001g08010			VIT_14s0060g01830
								VIT_18s0076g00200	VIT_04s0008g03400	VIT_14s0030g02240	VIT_02s0025g01610	VIT_18s0001g00850		VIT_10s0042g00960	VIT_19s0014g01650	VIT_05s0051g00680				VIT_13s0073g00520	VIT_05s0020g01170			VIT_18s0001g02100
								VIT_13s0074g00450	VIT_18s0001g05250	VIT_00s0253g00040	VIT_08s0058g01040	VIT_18s0001g00680		VIT_04s0023g03470	VIT_10s0003g04340	VIT_12s0035g00920				VIT_03s0063g01870	VIT_18s0001g07200			VIT_01s0026g01020
								VIT_07s0005g03050	VIT_01s0011g00770	VIT_18s0001g00470	VIT_09s0002g01850	VIT_18s0001g00400		VIT_15s0021g02090	VIT_12s0028g02540	VIT_13s0084g00670				VIT_06s0004g00980	VIT_10s0003g04050			VIT_01s0011g03850
								VIT_01s0011g06450	VIT_10s0003g00090	VIT_03s0038g03570	VIT_13s0019g02200	VIT_18s0001g00080		VIT_06s0080g01230	VIT_17s0000g07260	VIT_14s0068g01390				VIT_03s0091g00160	VIT_15s0021g02210			VIT_04s0079g00630
								VIT_08s0032g01170	VIT_19s0014g02160	VIT_12s0059g00770	VIT_03s0097g00530	VIT_18s0075g00780		VIT_14s0060g01490	VIT_01s0011g00570	VIT_14s0030g01890				VIT_06s0004g01020	VIT_19s0090g01200			VIT_00s0508g00040
								VIT_09s0002g01490	VIT_01s0011g05050	VIT_02s0154g00080	VIT_00s0415g00030	VIT_18s0075g00670		VIT_11s0016g05120	VIT_14s0006g00520	VIT_03s0088g00620				VIT_06s0004g01010	VIT_18s0001g14190			VIT_14s0066g02470
								VIT_07s0031g02840	VIT_03s0088g01250	VIT_18s0001g07630	VIT_04s0079g00790	VIT_18s0001g01290		VIT_09s0002g00690	VIT_11s0016g02960	VIT_09s0054g00380				VIT_01s0011g05180	VIT_11s0016g03580			VIT_07s0104g00450
								VIT_08s0040g02540	VIT_10s0003g00640	VIT_18s0001g13790	VIT_01s0010g02740	VIT_18s0075g00540		VIT_00s0252g00060	VIT_06s0004g00720	VIT_12s0055g00700				VIT_06s0004g00300	VIT_10s0003g04030			VIT_02s0025g02620
								VIT_08s0007g00280	VIT_11s0016g02890	VIT_04s0008g01860	VIT_16s0039g02040	VIT_18s0001g01010		VIT_07s0005g01290	VIT_19s0014g00090	VIT_03s0038g04110				VIT_05s0077g01690	VIT_12s0059g00190			VIT_08s0007g08460
								VIT_15s0048g00750	VIT_00s0341g00010	VIT_03s0063g00290	VIT_17s0000g07190	VIT_18s0075g00590		VIT_04s0008g06970	VIT_18s0122g00980	VIT_01s0026g00910				VIT_06s0061g01380				VIT_12s0028g03760
								VIT_11s0016g01870	VIT_19s0014g02500	VIT_16s0022g00860	VIT_14s0066g00850	VIT_18s0117g00550		VIT_09s0002g00700	VIT_19s0090g01070	VIT_17s0119g00110				VIT_06s0004g01030				VIT_05s0020g00610
								VIT_09s0002g01800	VIT_02s0012g00740	VIT_01s0011g05390	VIT_11s0016g05170	VIT_00s0731g00010		VIT_18s0001g03240	VIT_07s0129g00230	VIT_01s0011g03550				VIT_09s0054g00080				VIT_18s0001g15130
								VIT_01s0011g03380	VIT_11s0016g05000	VIT_04s0044g01100	VIT_05s0020g03970	VIT_00s1212g00020		VIT_01s0011g00560	VIT_03s0063g02490	VIT_02s0012g01260				VIT_04s0044g00040				VIT_18s0001g15230
								VIT_13s0074g00150	VIT_01s0011g05480	VIT_01s0150g00500	VIT_09s0002g04780	VIT_18s0001g00730		VIT_10s0003g00090	VIT_12s0059g01320	VIT_02s0241g00020				VIT_05s0077g01540				VIT_10s0003g00220
								VIT_05s0077g01210	VIT_14s0006g01870	VIT_17s0000g05870	VIT_09s0002g05660	VIT_18s0117g00450		VIT_05s0077g01500	VIT_19s0177g00300	VIT_01s0127g00700				VIT_11s0016g01060				VIT_03s0038g03660
								VIT_05s0020g00380	VIT_11s0016g01260	VIT_13s0064g00050	VIT_11s0016g00910	VIT_00s2280g00010		VIT_01s0011g05050	VIT_12s0057g01030	VIT_12s0034g01890				VIT_17s0000g04880				VIT_14s0030g01890
								VIT_10s0042g00140	VIT_11s0016g04920	VIT_12s0055g01180	VIT_06s0004g06570	VIT_18s0117g00600		VIT_15s0046g03090	VIT_06s0004g07960	VIT_11s0016g04920				VIT_05s0077g01560				VIT_18s0001g00040
								VIT_01s0011g00230	VIT_10s0116g00940	VIT_17s0000g08010	VIT_08s0007g00020	VIT_18s0001g00790		VIT_07s0104g00480	VIT_02s0033g00240	VIT_11s0016g02920				VIT_05s0077g01530				VIT_04s0023g02100
								VIT_05s0051g00830	VIT_10s0003g04180	VIT_01s0011g05960	VIT_00s0218g00100	VIT_18s0075g00980		VIT_08s0007g01270	VIT_13s0019g02890	VIT_08s0007g08520				VIT_00s1679g00010				VIT_06s0004g04110
								VIT_15s0048g01790	VIT_13s0156g00120	VIT_12s0028g01670	VIT_14s0066g01580	VIT_18s0075g00580		VIT_17s0000g05380	VIT_13s0019g02810	VIT_08s0007g01560				VIT_05s0077g01550				VIT_09s0054g00380
								VIT_11s0016g00570	VIT_15s0107g00310	VIT_10s0116g01640	VIT_13s0019g03220	VIT_18s0075g00630		VIT_00s1034g00010	VIT_04s0008g07370	VIT_07s0005g01320				VIT_08s0040g01770				VIT_17s0000g03200
								VIT_19s0015g01900	VIT_09s0002g01760	VIT_06s0080g00420	VIT_13s0073g00050	VIT_18s0075g00810		VIT_19s0015g00680	VIT_13s0073g00520	VIT_14s0060g01810				VIT_07s0005g06210				VIT_01s0026g00910
								VIT_16s0098g01880	VIT_04s0023g00670	VIT_08s0007g06000	VIT_17s0119g00080	VIT_00s0413g00010		VIT_03s0063g00080	VIT_02s0025g02700	VIT_18s0166g00090				VIT_03s0110g00170				VIT_03s0088g00490
								VIT_18s0001g00340	VIT_08s0040g01730	VIT_09s0002g02320	VIT_16s0022g00540	VIT_10s0116g01660		VIT_05s0049g00390	VIT_07s0104g01820	VIT_08s0058g00480				VIT_05s0102g00450				VIT_11s0016g02920
								VIT_18s0122g01150	VIT_04s0008g05470	VIT_12s0028g00530	VIT_12s0028g01160	VIT_09s0002g06420		VIT_05s0049g00420	VIT_07s0104g01800	VIT_01s0146g00100				VIT_18s0089g00630				VIT_14s0083g00380
								VIT_18s0001g00930	VIT_12s0028g00940	VIT_19s0014g03160	VIT_14s0060g00720	VIT_18s0001g02470		VIT_04s0008g00660	VIT_04s0079g00690	VIT_05s0049g00560				VIT_10s0003g01100				VIT_02s0025g02540
								VIT_00s0481g00020	VIT_10s0042g01160	VIT_17s0000g02700	VIT_08s0007g04550	VIT_14s0066g01240		VIT_09s0002g01440	VIT_01s0026g01340	VIT_14s0030g02170				VIT_18s0001g00990				VIT_03s0038g03550
								VIT_18s0001g14080	VIT_18s0001g11220	VIT_05s0020g03170	VIT_13s0067g03200	VIT_07s0005g00660		VIT_11s0016g01370	VIT_07s0104g01830	VIT_11s0037g00200				VIT_06s0004g07500				VIT_12s0034g01970
								VIT_06s0004g01020	VIT_18s0001g14950	VIT_12s0028g03480	VIT_06s0004g02120	VIT_15s0046g00240		VIT_11s0016g04920	VIT_19s0085g00600	VIT_17s0000g02110				VIT_09s0002g02980				VIT_04s0023g01850
								VIT_06s0004g01030	VIT_02s0025g01380	VIT_15s0024g00050	VIT_04s0023g00790	VIT_13s0019g03780		VIT_04s0008g00470	VIT_17s0000g10430	VIT_18s0001g10770				VIT_09s0002g03010				VIT_10s0003g01590
								VIT_06s0004g01010	VIT_12s0059g01250	VIT_17s0000g08730	VIT_18s0001g00760	VIT_01s0011g03530		VIT_10s0116g00940	VIT_16s0022g00540	VIT_14s0030g01790				VIT_08s0058g00690				VIT_05s0077g01330
								VIT_00s0397g00050	VIT_07s0005g00740	VIT_01s0026g00840	VIT_00s0880g00020	VIT_15s0024g00410		VIT_10s0003g04180	VIT_11s0016g02280	VIT_09s0054g00430				VIT_12s0028g01950				VIT_07s0031g00040
								VIT_12s0057g00780	VIT_17s0000g03760	VIT_04s0023g03470	VIT_15s0046g01370	VIT_08s0007g06560		VIT_11s0037g01210	VIT_00s0301g00040	VIT_06s0004g00380				VIT_09s0002g02990				VIT_15s0046g03090
								VIT_18s0089g00010	VIT_18s0001g08140	VIT_18s0001g15020	VIT_16s0050g02360	VIT_08s0007g06610		VIT_09s0018g02090	VIT_08s0007g01850	VIT_01s0011g05440				VIT_11s0052g00200				VIT_10s0092g00220
								VIT_16s0013g01500	VIT_07s0151g01040	VIT_13s0019g04030	VIT_04s0008g01130	VIT_13s0019g02040		VIT_07s0005g02300	VIT_14s0066g01050	VIT_08s0007g05180				VIT_12s0034g02530				VIT_18s0001g08810
								VIT_00s0316g00010	VIT_15s0021g00270	VIT_18s0001g10350	VIT_02s0012g01250	VIT_08s0007g01230		VIT_17s0000g07560	VIT_06s0009g01580	VIT_04s0043g00860				VIT_18s0001g06240				VIT_03s0110g00080
								VIT_13s0139g00100	VIT_14s0060g01940	VIT_06s0004g06390	VIT_18s0001g07320	VIT_12s0028g03580		VIT_17s0000g07370	VIT_09s0002g04880	VIT_05s0020g04160				VIT_10s0071g00150				VIT_11s0016g04260
								VIT_14s0066g00760	VIT_01s0026g00170	VIT_08s0007g02700	VIT_00s0216g00060	VIT_00s0265g00110		VIT_17s0000g07420	VIT_00s0216g00020	VIT_12s0059g02050				VIT_12s0057g01130				VIT_01s0011g04780
								VIT_04s0044g01300	VIT_03s0038g02280	VIT_08s0058g00790	VIT_05s0062g01180	VIT_19s0085g00850		VIT_15s0107g00310	VIT_02s0025g02600	VIT_12s0034g01870				VIT_15s0024g00400				VIT_08s0007g02410
								VIT_12s0059g00800	VIT_09s0002g08960	VIT_18s0001g14030	VIT_09s0002g01120	VIT_14s0108g00280		VIT_12s0059g00370	VIT_04s0023g01140	VIT_18s0001g10360				VIT_10s0071g00190				VIT_00s0682g00050
								VIT_10s0116g00700	VIT_17s0000g02020	VIT_06s0004g00590	VIT_12s0059g01810	VIT_11s0052g00390		VIT_16s0050g01980	VIT_12s0028g03100	VIT_13s0019g05150				VIT_05s0102g01100				VIT_04s0079g00260
								VIT_03s0097g00550	VIT_08s0007g09010	VIT_12s0028g02430	VIT_18s0001g02700	VIT_02s0012g01010		VIT_10s0042g01160	VIT_02s0025g03400	VIT_01s0137g00340				VIT_18s0089g00600				VIT_06s0061g00680
								VIT_19s0027g01520	VIT_18s0001g09140	VIT_07s0129g01100	VIT_10s0003g04000	VIT_05s0020g03030		VIT_08s0058g01310	VIT_09s0002g01350	VIT_00s0586g00030				VIT_04s0069g01010				VIT_05s0020g01830
								VIT_04s0008g02950	VIT_01s0010g00670	VIT_12s0134g00500	VIT_12s0028g00320	VIT_13s0067g03780		VIT_01s0011g04130	VIT_02s0025g02680	VIT_04s0008g05700				VIT_06s0009g01620				VIT_13s0147g00230
								VIT_08s0040g03250	VIT_08s0058g00260	VIT_00s0203g00160	VIT_10s0003g02890	VIT_03s0091g00560		VIT_04s0008g04320	VIT_05s0029g00440	VIT_01s0010g02910				VIT_08s0007g02360				VIT_12s0059g01580
								VIT_18s0001g05110	VIT_19s0093g00580	VIT_18s0001g09160	VIT_19s0014g00160	VIT_10s0042g00700		VIT_18s0001g11720	VIT_03s0063g02480	VIT_01s0011g03050				VIT_06s0004g01440				VIT_00s0665g00030
								VIT_13s0156g00340	VIT_11s0016g04860	VIT_11s0016g01200	VIT_10s0003g02900	VIT_17s0000g06710		VIT_02s0025g00470	VIT_05s0102g00310	VIT_05s0062g00820				VIT_13s0019g01720				VIT_00s0988g00010
								VIT_08s0007g05090	VIT_11s0016g03560	VIT_18s0072g00260	VIT_13s0019g04140	VIT_06s0004g08250		VIT_08s0007g05580	VIT_08s0007g07410	VIT_09s0002g00370				VIT_11s0016g04750				VIT_11s0016g05440
								VIT_14s0081g00670	VIT_09s0002g04120	VIT_11s0037g00010	VIT_12s0055g01110	VIT_13s0067g01020		VIT_12s0035g00850	VIT_06s0004g05020	VIT_12s0034g01950				VIT_18s0001g06430				VIT_08s0056g01160
								VIT_07s0005g02830	VIT_05s0029g00140	VIT_18s0001g03240	VIT_07s0151g01000	VIT_08s0105g00380		VIT_05s0020g02540	VIT_02s0025g01600	VIT_05s0020g02500				VIT_07s0031g03210				VIT_01s0011g02320
								VIT_08s0217g00020	VIT_16s0013g01080	VIT_07s0031g00190	VIT_13s0019g04280	VIT_01s0011g02960		VIT_07s0104g00420	VIT_16s0050g02440	VIT_16s0039g02700				VIT_07s0031g01980				VIT_08s0007g01950
								VIT_18s0072g00690	VIT_00s0662g00040	VIT_18s0089g01030		VIT_09s0002g02840		VIT_12s0035g02180	VIT_11s0016g05750	VIT_01s0011g02320				VIT_01s0026g00820				VIT_04s0023g00120
								VIT_09s0002g01860	VIT_12s0059g02750	VIT_07s0005g00820		VIT_16s0098g00460		VIT_19s0014g01560	VIT_17s0000g07190	VIT_08s0058g00860				VIT_19s0014g04690				VIT_08s0105g00200
								VIT_01s0010g00690	VIT_07s0191g00250	VIT_19s0014g03180		VIT_10s0003g02110		VIT_14s0066g02270	VIT_13s0019g03170	VIT_18s0001g09330				VIT_07s0031g02200				VIT_09s0002g04580
								VIT_08s0007g08090	VIT_14s0066g01290	VIT_16s0013g00890		VIT_14s0066g00250		VIT_12s0057g01320	VIT_04s0008g01490	VIT_07s0005g01140				VIT_08s0040g01220				VIT_05s0049g00800
								VIT_18s0001g14650	VIT_06s0061g00560	VIT_04s0008g06000		VIT_01s0137g00700		VIT_05s0077g02010	VIT_08s0007g00130	VIT_01s0010g03870				VIT_04s0044g01620				VIT_02s0025g00500
								VIT_12s0028g01400	VIT_11s0016g03370	VIT_01s0011g03070		VIT_18s0001g02760		VIT_04s0023g02610	VIT_06s0004g04510	VIT_09s0002g04580				VIT_01s0011g04860				VIT_06s0061g01360
								VIT_11s0016g01280	VIT_09s0002g08510	VIT_11s0016g00640		VIT_09s0002g00510		VIT_01s0011g03680	VIT_02s0025g02140	VIT_19s0090g00200				VIT_13s0019g01650				VIT_01s0011g06580
								VIT_19s0015g00780	VIT_03s0038g04060	VIT_06s0004g02750		VIT_01s0010g02750		VIT_10s0003g00580	VIT_11s0037g00510	VIT_09s0018g01540				VIT_14s0108g01020				VIT_01s0010g03680
								VIT_10s0116g00420	VIT_01s0011g04830	VIT_10s0003g00420		VIT_09s0002g01080		VIT_18s0001g06030	VIT_00s0194g00030	VIT_03s0063g02320				VIT_17s0000g06360				VIT_02s0012g00880
								VIT_10s0042g00960	VIT_00s0533g00050	VIT_05s0077g01480		VIT_15s0048g00640		VIT_18s0001g08330	VIT_19s0015g01090	VIT_16s0050g01890				VIT_13s0067g02930				VIT_13s0064g00460
								VIT_17s0053g00980	VIT_12s0028g03390	VIT_04s0008g00220		VIT_00s0370g00010		VIT_17s0000g02020	VIT_16s0050g01150	VIT_13s0074g00350				VIT_09s0002g08510				VIT_04s0023g01890
								VIT_01s0011g00790	VIT_14s0060g02220	VIT_04s0023g01250		VIT_06s0080g00810		VIT_15s0024g00660	VIT_02s0025g00280	VIT_00s0259g00070				VIT_03s0038g03430				VIT_04s0043g00850
								VIT_08s0040g02090	VIT_00s0174g00130	VIT_01s0010g02070		VIT_18s0122g00230		VIT_14s0081g00630	VIT_09s0002g04680	VIT_17s0000g00890				VIT_14s0083g01110				VIT_03s0091g01090
								VIT_02s0025g02250	VIT_08s0040g02030	VIT_05s0094g00480		VIT_03s0038g03530		VIT_16s0013g00970	VIT_14s0128g00190	VIT_05s0020g02830				VIT_13s0067g00660				VIT_09s0002g04240
								VIT_17s0000g08290	VIT_15s0048g01750	VIT_12s0028g01110		VIT_14s0171g00400		VIT_05s0020g00630	VIT_12s0055g00930	VIT_09s0002g07540				VIT_12s0055g01280				VIT_00s0189g00010
								VIT_04s0008g05840	VIT_08s0032g00910	VIT_07s0191g00180		VIT_13s0158g00100		VIT_17s0000g09130	VIT_07s0005g00050	VIT_18s0001g08530				VIT_07s0005g05960				VIT_19s0015g01230
								VIT_18s0001g03240	VIT_12s0057g01020	VIT_10s0071g00660		VIT_03s0097g00520		VIT_17s0000g09120	VIT_19s0015g00920	VIT_19s0014g01360				VIT_18s0001g06120				VIT_01s0011g02780
								VIT_11s0016g04650	VIT_18s0001g15010	VIT_06s0004g07910		VIT_05s0077g01680		VIT_16s0013g00890	VIT_18s0001g14230	VIT_02s0241g00100				VIT_03s0017g01040				VIT_11s0016g03760
								VIT_18s0001g07670	VIT_05s0051g00330	VIT_01s0026g00940		VIT_19s0014g01640		VIT_05s0094g00480	VIT_18s0001g05570	VIT_04s0043g00850				VIT_18s0001g06090				VIT_13s0019g03610
								VIT_15s0046g03070	VIT_05s0020g01850	VIT_05s0094g00350		VIT_00s0615g00030		VIT_18s0089g01030	VIT_10s0071g00870	VIT_04s0044g01430				VIT_03s0017g01140				VIT_01s0011g05420
								VIT_15s0046g03090	VIT_08s0056g00980	VIT_05s0094g00220		VIT_01s0011g03650		VIT_16s0013g01110	VIT_02s0025g01220	VIT_05s0077g00770				VIT_03s0180g00040				VIT_04s0008g06670
								VIT_18s0001g11590	VIT_05s0124g00230	VIT_15s0046g01690		VIT_07s0031g00490		VIT_04s0008g06000	VIT_01s0011g05360	VIT_12s0035g00530				VIT_02s0025g01360
								VIT_06s0009g02420	VIT_01s0010g03730	VIT_03s0038g03400		VIT_04s0044g01290		VIT_16s0013g01070	VIT_11s0103g00050	VIT_07s0031g01630				VIT_17s0000g00200
								VIT_15s0021g00480	VIT_10s0003g03880	VIT_04s0023g03600		VIT_06s0004g03540		VIT_16s0013g00980	VIT_11s0103g00040	VIT_09s0002g08680				VIT_01s0150g00120
								VIT_15s0046g00470	VIT_16s0100g00510	VIT_17s0000g07770		VIT_18s0001g11240		VIT_16s0013g01120	VIT_04s0044g00110	VIT_00s0480g00020				VIT_04s0008g06000
								VIT_09s0002g04280	VIT_15s0046g01540	VIT_13s0019g01660		VIT_17s0000g02970		VIT_16s0013g01090	VIT_01s0011g06190	VIT_11s0016g00780				VIT_07s0005g03230
								VIT_11s0016g03770	VIT_00s2507g00010	VIT_06s0004g05670		VIT_02s0025g04420		VIT_16s0013g01050	VIT_05s0020g02210	VIT_05s0020g03360				VIT_07s0151g00440
								VIT_17s0000g05380	VIT_10s0116g01390	VIT_00s0153g00050		VIT_01s0011g04450		VIT_16s0013g00950	VIT_11s0016g02620	VIT_04s0008g02760				VIT_18s0001g03240
								VIT_19s0014g02850	VIT_14s0171g00340	VIT_12s0028g00920		VIT_10s0116g01860		VIT_16s0013g01080	VIT_01s0011g04480	VIT_13s0019g03610				VIT_05s0049g00510
								VIT_08s0007g02510	VIT_08s0032g00150	VIT_13s0019g04070		VIT_17s0000g02990		VIT_16s0013g00900	VIT_07s0141g00730	VIT_14s0030g01750				VIT_14s0068g01040
								VIT_19s0015g00670	VIT_00s0391g00040	VIT_15s0045g00440		VIT_00s0225g00050		VIT_16s0013g00990	VIT_05s0020g04800	VIT_16s0098g01530				VIT_06s0004g05240
								VIT_05s0049g00310	VIT_06s0009g02700	VIT_05s0077g02010		VIT_08s0056g00780		VIT_16s0013g01000	VIT_14s0081g00500	VIT_01s0011g05420				VIT_18s0001g11240
								VIT_04s0008g00470	VIT_08s0032g00190	VIT_07s0031g03090		VIT_18s0001g11760		VIT_07s0031g00710	VIT_07s0005g01060	VIT_01s0010g00510				VIT_09s0002g09120
								VIT_09s0018g02090	VIT_18s0001g00600	VIT_03s0091g00390		VIT_14s0081g00550		VIT_08s0040g00840	VIT_00s0179g00340	VIT_18s0089g01220				VIT_18s0072g00260
								VIT_13s0047g00320	VIT_18s0001g02630	VIT_05s0020g04420		VIT_16s0050g01190		VIT_07s0005g00680	VIT_14s0060g02360	VIT_14s0006g02490				VIT_12s0059g00280
								VIT_08s0007g05330	VIT_14s0068g00030	VIT_17s0000g03380		VIT_01s0026g00900		VIT_09s0002g00910	VIT_06s0004g04270	VIT_01s0010g00760				VIT_08s0007g05860
								VIT_04s0008g07260	VIT_04s0008g04240	VIT_11s0206g00080		VIT_02s0025g02500		VIT_14s0068g00250	VIT_08s0040g03300	VIT_05s0020g00260				VIT_07s0129g00580
								VIT_17s0000g07560	VIT_17s0053g00600	VIT_11s0206g00070		VIT_04s0023g01320		VIT_17s0000g07350	VIT_00s0865g00030	VIT_03s0038g00440				VIT_03s0088g00810
								VIT_17s0000g07370	VIT_12s0035g00270	VIT_04s0023g00560		VIT_14s0128g00390		VIT_06s0004g07440	VIT_00s0868g00020	VIT_19s0014g01370				VIT_17s0000g07400
								VIT_17s0000g07420	VIT_18s0001g14450	VIT_14s0030g01980		VIT_04s0023g02420		VIT_08s0040g02730	VIT_19s0014g05020	VIT_18s0001g06610				VIT_07s0031g02390
								VIT_12s0059g00340	VIT_04s0023g03510	VIT_15s0048g01430		VIT_17s0000g01970		VIT_07s0104g00400	VIT_07s0104g00960	VIT_00s0981g00010				VIT_17s0000g07560
								VIT_12s0059g00350	VIT_02s0012g00980	VIT_01s0026g01590		VIT_07s0151g00500		VIT_00s0341g00040	VIT_14s0030g00450	VIT_04s0008g06790				VIT_11s0052g01650
								VIT_12s0059g00430	VIT_04s0008g01910	VIT_14s0006g01030		VIT_04s0023g03610		VIT_11s0118g00030	VIT_06s0004g04250					VIT_17s0000g07420
								VIT_16s0022g00310	VIT_13s0064g00940	VIT_15s0046g00070		VIT_10s0003g00410		VIT_01s0011g04830	VIT_06s0004g04240					VIT_11s0016g01970
								VIT_08s0105g00550	VIT_13s0067g01840	VIT_11s0016g03640		VIT_07s0031g02240		VIT_11s0016g04190	VIT_06s0004g04300					VIT_05s0020g04420
								VIT_06s0004g03220	VIT_08s0056g01620	VIT_17s0000g07890		VIT_19s0015g01370		VIT_03s0063g01780	VIT_13s0019g05370					VIT_04s0008g01080
								VIT_18s0041g01900	VIT_00s0404g00050	VIT_08s0007g04750		VIT_00s0253g00040		VIT_10s0003g05470	VIT_06s0004g04230					VIT_04s0023g00830
								VIT_15s0021g02450	VIT_19s0014g03520	VIT_13s0064g01300		VIT_03s0038g03570		VIT_01s0011g01980	VIT_06s0004g01710					VIT_14s0060g01470
								VIT_06s0004g00460	VIT_01s0011g03560	VIT_02s0012g00550		VIT_12s0059g00770		VIT_12s0059g00570	VIT_18s0001g13680					VIT_13s0158g00150
								VIT_08s0058g01310	VIT_14s0068g02130	VIT_12s0057g00010		VIT_08s0007g03610		VIT_15s0048g02720	VIT_06s0004g01690					VIT_00s0179g00260
								VIT_07s0104g00600	VIT_00s1682g00020	VIT_00s1353g00010		VIT_14s0006g02900		VIT_14s0068g00520	VIT_18s0072g00800					VIT_14s0030g02150
								VIT_11s0016g02020	VIT_05s0094g01190	VIT_09s0002g03010		VIT_04s0044g00220		VIT_14s0060g01970	VIT_04s0044g00560					VIT_17s0000g03370
								VIT_16s0098g01840	VIT_00s0555g00020	VIT_09s0002g08640		VIT_18s0001g01110		VIT_03s0038g03630	VIT_13s0064g01340					VIT_09s0002g04560
								VIT_04s0023g02140	VIT_11s0052g01640	VIT_06s0004g03920		VIT_04s0044g00270		VIT_00s0181g00080	VIT_15s0046g01110					VIT_13s0019g02710
								VIT_19s0015g00910	VIT_05s0077g00710	VIT_02s0025g04520		VIT_11s0016g03400		VIT_09s0002g08660	VIT_08s0007g00040					VIT_00s2317g00010
								VIT_15s0048g02020	VIT_17s0000g00520	VIT_07s0197g00080		VIT_05s0102g00450		VIT_11s0037g00430	VIT_13s0019g00800					VIT_10s0003g05480
								VIT_00s0265g00120	VIT_15s0048g00730	VIT_06s0009g01810		VIT_17s0000g00010		VIT_00s0214g00090	VIT_06s0004g04370					VIT_19s0014g04090
								VIT_11s0016g03340	VIT_07s0129g00310	VIT_16s0098g01140		VIT_11s0016g04080		VIT_17s0000g01250	VIT_13s0067g03650					VIT_14s0108g00280
								VIT_04s0008g02120	VIT_07s0129g00320	VIT_05s0020g03380		VIT_09s0002g03610		VIT_14s0068g00110	VIT_13s0019g00760					VIT_10s0003g04860
								VIT_17s0000g08790	VIT_07s0129g00300	VIT_03s0038g02650		VIT_06s0080g00790		VIT_14s0068g00130	VIT_06s0004g03890					VIT_05s0077g01090
								VIT_15s0046g01860	VIT_09s0002g07520	VIT_04s0044g01850		VIT_19s0015g01280		VIT_08s0040g00010	VIT_13s0019g00780					VIT_12s0142g00780
								VIT_08s0007g05570	VIT_00s0227g00200	VIT_04s0044g01880		VIT_08s0056g01190		VIT_01s0244g00090	VIT_01s0150g00550					VIT_07s0095g00290
								VIT_08s0007g05580	VIT_00s0174g00330	VIT_03s0063g01970		VIT_05s0077g00500		VIT_14s0068g00010	VIT_16s0098g01510					VIT_18s0001g10310
								VIT_04s0008g03660	VIT_19s0014g00060	VIT_03s0063g01960		VIT_07s0005g03340		VIT_09s0002g04010	VIT_17s0000g02550					VIT_06s0004g07030
								VIT_03s0038g03400	VIT_02s0025g00210	VIT_06s0061g00450		VIT_08s0007g05030		VIT_04s0008g04240	VIT_04s0008g00880					VIT_13s0067g02030
								VIT_12s0057g01530	VIT_07s0005g06500	VIT_05s0020g00440		VIT_07s0130g00040		VIT_14s0066g01900	VIT_09s0002g03740					VIT_16s0098g00010
								VIT_11s0037g00210	VIT_09s0002g02990	VIT_04s0008g04180		VIT_11s0016g02780		VIT_18s0001g14450	VIT_01s0026g01530					VIT_04s0008g01360
								VIT_03s0038g00410	VIT_01s0010g02210	VIT_14s0068g02190		VIT_04s0008g01800		VIT_04s0023g03510	VIT_08s0007g06670					VIT_04s0044g00750
								VIT_03s0038g00430	VIT_15s0048g01810	VIT_10s0003g02030		VIT_09s0002g01400		VIT_10s0071g01160	VIT_00s0732g00010					VIT_14s0108g00340
								VIT_18s0001g08130	VIT_03s0038g00370	VIT_06s0009g01110		VIT_18s0001g11170		VIT_12s0035g02150	VIT_13s0156g00260					VIT_03s0038g03800
								VIT_02s0025g03450	VIT_04s0023g03010	VIT_04s0008g02860		VIT_07s0129g01050		VIT_17s0000g09160	VIT_10s0003g04670					VIT_07s0104g01270
								VIT_17s0000g04540	VIT_11s0016g02170	VIT_18s0001g14840		VIT_00s1352g00010		VIT_08s0058g00440	VIT_06s0004g02800					VIT_04s0008g00370
								VIT_06s0004g01310	VIT_18s0001g01390	VIT_19s0015g00190		VIT_18s0001g09850		VIT_13s0067g01840	VIT_11s0037g00340					VIT_19s0014g04060
								VIT_15s0021g02470	VIT_14s0060g00760	VIT_07s0005g06410		VIT_12s0028g00980		VIT_08s0058g00410	VIT_10s0003g00330					VIT_05s0062g00760
								VIT_06s0004g04590	VIT_01s0127g00470	VIT_06s0004g06890		VIT_16s0050g00100		VIT_07s0031g03200	VIT_00s0323g00030					VIT_16s0148g00020
								VIT_09s0002g06820	VIT_05s0077g00840	VIT_14s0219g00120		VIT_14s0128g00020		VIT_04s0008g00800	VIT_01s0146g00400					VIT_05s0020g02910
								VIT_16s0039g02210	VIT_01s0010g02030	VIT_02s0033g01370		VIT_19s0014g03290		VIT_00s0404g00050	VIT_18s0001g09360					VIT_16s0050g01700
								VIT_10s0003g00130	VIT_14s0108g00740	VIT_13s0067g02220		VIT_07s0031g02610		VIT_15s0021g02260	VIT_11s0016g04270					VIT_12s0035g00020
								VIT_07s0141g00690	VIT_18s0001g09460	VIT_13s0019g04660		VIT_18s0001g02300		VIT_00s1512g00010	VIT_07s0129g00530					VIT_18s0001g10070
								VIT_10s0003g00580	VIT_08s0007g07550	VIT_03s0038g03530		VIT_18s0001g11980		VIT_19s0090g01440	VIT_15s0046g01960					VIT_12s0034g02570
								VIT_07s0005g00870	VIT_05s0077g01450	VIT_14s0171g00400		VIT_01s0026g02710		VIT_08s0040g00790	VIT_06s0009g02640					VIT_00s0366g00020
								VIT_07s0005g00850	VIT_11s0016g01160	VIT_10s0003g04540		VIT_12s0028g00860		VIT_03s0038g03190	VIT_02s0025g04580					VIT_16s0050g01880
								VIT_14s0068g00390	VIT_13s0019g02330	VIT_01s0026g01960		VIT_08s0007g07640		VIT_00s1682g00020	VIT_14s0068g00270					VIT_19s0014g04190
								VIT_06s0004g07020	VIT_18s0001g07130	VIT_16s0013g01950		VIT_11s0016g03210		VIT_00s0555g00020	VIT_02s0025g00130					VIT_08s0007g06560
								VIT_05s0049g00090	VIT_01s0010g01840	VIT_10s0405g00050		VIT_04s0008g00180		VIT_16s0022g01390	VIT_16s0050g00790					VIT_05s0020g03870
								VIT_06s0004g05240	VIT_17s0000g06280	VIT_11s0016g03400		VIT_15s0048g00980		VIT_18s0001g11430	VIT_08s0040g00630					VIT_04s0044g01990
								VIT_14s0081g00730	VIT_08s0007g03430	VIT_18s0001g12560		VIT_11s0052g00880		VIT_18s0001g11520	VIT_18s0072g00480					VIT_17s0000g04360
								VIT_05s0049g00510	VIT_04s0044g02010	VIT_00s0181g00010		VIT_02s0012g00150		VIT_01s0010g00380	VIT_10s0042g00940					VIT_16s0013g01920
								VIT_05s0049g00490	VIT_16s0022g02310	VIT_11s0052g00240		VIT_02s0012g00410		VIT_10s0003g02910	VIT_07s0141g00290					VIT_11s0016g03880
								VIT_02s0234g00130	VIT_14s0030g00440	VIT_18s0001g10520		VIT_13s0067g00260		VIT_07s0129g00310	VIT_09s0002g05160					VIT_14s0060g00460
								VIT_15s0021g01630	VIT_15s0046g02560	VIT_02s0025g04420		VIT_18s0001g10180		VIT_07s0129g00290	VIT_09s0002g05150					VIT_12s0059g02600
								VIT_06s0004g01610	VIT_09s0002g04340	VIT_07s0031g00750		VIT_17s0000g07790		VIT_19s0014g05040	VIT_05s0020g01070					VIT_19s0014g04320
								VIT_16s0013g00890	VIT_18s0001g15700	VIT_06s0061g01310		VIT_03s0038g03730		VIT_15s0046g01930	VIT_18s0001g08090					VIT_12s0059g02540
								VIT_13s0019g00540	VIT_16s0098g01560	VIT_01s0011g00530		VIT_18s0001g03910		VIT_09s0002g02990	VIT_08s0007g02770					VIT_00s1830g00010
								VIT_18s0089g01030	VIT_17s0000g07260	VIT_02s0012g00730		VIT_17s0000g10000		VIT_09s0002g03020	VIT_08s0007g02760					VIT_16s0022g01660
								VIT_10s0003g00140	VIT_01s0011g00570	VIT_13s0067g02500		VIT_02s0033g00700		VIT_19s0015g01720	VIT_08s0058g00540					VIT_16s0148g00330
								VIT_12s0028g03270	VIT_14s0006g00520	VIT_14s0128g00390		VIT_02s0109g00430		VIT_12s0028g01600	VIT_14s0068g02010					VIT_14s0066g02680
								VIT_16s0100g00400	VIT_05s0029g00190	VIT_02s0025g02510		VIT_02s0033g00790		VIT_16s0050g02630	VIT_01s0011g03660					VIT_16s0039g02400
								VIT_10s0003g00590	VIT_19s0014g00090	VIT_04s0023g03570		VIT_11s0016g04050		VIT_18s0001g01390	VIT_06s0004g04720					VIT_04s0008g02510
								VIT_07s0005g03220	VIT_18s0122g00980	VIT_03s0097g00510		VIT_04s0023g01710		VIT_15s0048g00340	VIT_08s0058g00270					VIT_05s0020g03290
								VIT_07s0005g03210	VIT_19s0090g01070	VIT_05s0049g01550		VIT_08s0058g00400		VIT_14s0060g00790	VIT_17s0000g01870					VIT_10s0092g00650
								VIT_05s0049g00500	VIT_12s0059g01320	VIT_08s0007g01310		VIT_08s0007g08020		VIT_01s0127g00470	VIT_04s0023g01430					VIT_16s0148g00220
								VIT_18s0072g00260	VIT_02s0025g02770	VIT_09s0002g04130		VIT_18s0166g00250		VIT_14s0066g02350	VIT_03s0180g00320					VIT_10s0003g01430
								VIT_05s0020g00460	VIT_07s0129g00230	VIT_15s0021g00330		VIT_03s0017g01460		VIT_05s0077g00690	VIT_06s0004g07220					VIT_16s0022g01710
								VIT_09s0018g01920	VIT_03s0063g02490	VIT_04s0008g01060		VIT_07s0005g04350		VIT_08s0007g07470	VIT_19s0014g04690					VIT_04s0008g00440
								VIT_08s0040g00840	VIT_19s0085g00810	VIT_06s0061g01120		VIT_16s0013g01590		VIT_17s0000g06590	VIT_07s0129g00660					VIT_19s0015g02410
								VIT_07s0005g00680	VIT_12s0057g01480	VIT_12s0121g00230		VIT_05s0049g00520		VIT_07s0005g00150	VIT_17s0000g00330					VIT_00s0388g00020
								VIT_17s0000g07350	VIT_18s0001g12370	VIT_10s0003g00550		VIT_08s0032g01000		VIT_17s0000g05410	VIT_14s0068g01200					VIT_07s0129g00880
								VIT_08s0040g02730	VIT_13s0019g03120	VIT_04s0008g01870		VIT_05s0049g00790		VIT_12s0142g00340	VIT_05s0020g03770					VIT_03s0017g01550
								VIT_06s0004g04010	VIT_04s0079g00600	VIT_06s0009g01380		VIT_00s0650g00010		VIT_06s0004g02740	VIT_08s0007g00980					VIT_04s0008g00310
								VIT_07s0104g00700	VIT_08s0007g07400	VIT_17s0000g09160		VIT_05s0094g00160		VIT_13s0019g04390	VIT_11s0016g00590					VIT_05s0020g03270
								VIT_12s0059g00620	VIT_07s0031g02170	VIT_08s0007g04800		VIT_05s0049g00720		VIT_03s0038g00490	VIT_16s0022g00960					VIT_14s0083g01210
								VIT_08s0007g08120	VIT_11s0037g00890	VIT_00s0480g00060		VIT_03s0110g00430		VIT_03s0038g00740	VIT_00s0323g00050					VIT_16s0050g00010
								VIT_17s0000g06220	VIT_04s0008g07370	VIT_08s0058g01000		VIT_09s0002g02570		VIT_05s0020g03710	VIT_03s0088g00060					VIT_16s0050g01690
								VIT_08s0032g00420	VIT_05s0020g02480	VIT_06s0004g02060		VIT_09s0002g03700		VIT_01s0026g00590	VIT_14s0060g00360					VIT_18s0122g01260
								VIT_04s0008g03430	VIT_13s0019g00340	VIT_04s0043g00220		VIT_18s0001g09680		VIT_11s0037g01280	VIT_01s0011g03600					VIT_01s0026g02270
								VIT_00s0341g00040	VIT_08s0032g01030	VIT_11s0016g02180		VIT_03s0063g01770		VIT_05s0020g03690	VIT_06s0009g02110					VIT_16s0039g01330
								VIT_00s1455g00010	VIT_04s0008g01120	VIT_18s0001g15410		VIT_06s0004g01990		VIT_13s0019g04360	VIT_18s0122g01030					VIT_18s0001g11620
								VIT_00s0309g00090	VIT_17s0000g08670	VIT_04s0044g01120		VIT_07s0005g01130		VIT_02s0025g01720	VIT_11s0016g05050					VIT_19s0014g00830
								VIT_00s0309g00050	VIT_13s0073g00520	VIT_04s0044g01110		VIT_01s0011g02600		VIT_01s0010g01840	VIT_12s0028g02340					VIT_00s0262g00120
								VIT_02s0012g00830	VIT_07s0104g00320	VIT_03s0017g01760		VIT_03s0017g01410		VIT_15s0048g01530	VIT_19s0015g01210					VIT_17s0000g02360
								VIT_13s0067g00230	VIT_07s0104g01820	VIT_13s0158g00340		VIT_11s0118g00730		VIT_15s0024g00850	VIT_15s0046g01320					VIT_16s0039g01310
								VIT_03s0063g01780	VIT_06s0004g05680	VIT_06s0061g00040		VIT_18s0001g08590		VIT_18s0001g12000	VIT_05s0020g03890					VIT_06s0004g05170
								VIT_11s0016g02110	VIT_07s0005g00030	VIT_00s0824g00010		VIT_05s0049g00750		VIT_17s0000g05360	VIT_07s0104g01270					VIT_14s0068g00010
								VIT_10s0003g05470	VIT_07s0104g01830	VIT_14s0108g01600		VIT_05s0049g00550		VIT_19s0140g00120	VIT_17s0053g00590					VIT_16s0148g00060
								VIT_00s2648g00010	VIT_18s0001g00690	VIT_14s0108g01590		VIT_14s0030g01220		VIT_18s0001g14270	VIT_07s0005g05510					VIT_17s0000g03510
								VIT_12s0028g01780	VIT_19s0093g00310	VIT_14s0108g01610		VIT_05s0049g00840		VIT_18s0157g00020	VIT_08s0007g03090					VIT_19s0014g04130
								VIT_12s0028g01770	VIT_16s0039g00970	VIT_00s2576g00010		VIT_17s0000g00680		VIT_04s0008g04210	VIT_17s0000g04330					VIT_10s0071g00440
								VIT_14s0108g01540	VIT_06s0004g03690	VIT_01s0011g01290		VIT_08s0007g05830		VIT_17s0000g01830	VIT_08s0007g00340					VIT_19s0014g04080
								VIT_18s0001g06680	VIT_12s0035g02110	VIT_12s0034g01140		VIT_18s0001g11730		VIT_10s0116g01640	VIT_18s0001g07550					VIT_16s0098g00110
								VIT_08s0032g00730	VIT_15s0048g00950	VIT_02s0025g02410		VIT_01s0137g00790		VIT_08s0007g07560	VIT_19s0014g05070					VIT_17s0000g03330
								VIT_00s0181g00080	VIT_14s0068g00680	VIT_11s0103g00190		VIT_05s0049g00760		VIT_11s0016g05560	VIT_00s0532g00020					VIT_19s0014g04160
								VIT_07s0031g02420	VIT_00s0301g00040	VIT_05s0077g01310		VIT_12s0059g01720		VIT_06s0080g00420	VIT_17s0000g03290					VIT_19s0014g04050
								VIT_06s0009g03670	VIT_00s0274g00060	VIT_09s0002g02120		VIT_07s0104g01130		VIT_08s0007g06000	VIT_14s0128g00460					VIT_08s0058g00540
								VIT_10s0116g01310	VIT_08s0007g01850	VIT_11s0016g02200		VIT_13s0067g02630		VIT_10s0003g00250	VIT_19s0090g01600					VIT_00s0388g00060
								VIT_06s0080g00910	VIT_02s0012g00020	VIT_01s0011g04180		VIT_05s0049g00730		VIT_12s0057g00940	VIT_19s0027g00080					VIT_04s0008g00300
								VIT_10s0116g01360	VIT_02s0012g00050	VIT_13s0019g01190		VIT_08s0056g01240		VIT_13s0019g03060	VIT_18s0001g07800					VIT_16s0148g00320
								VIT_08s0040g01290	VIT_14s0108g00940	VIT_00s0375g00030		VIT_19s0090g01340		VIT_13s0019g03020	VIT_14s0030g01360					VIT_13s0067g03780
								VIT_00s1386g00010	VIT_07s0005g00360	VIT_10s0071g01100		VIT_00s0233g00010		VIT_11s0016g03010	VIT_07s0005g00940					VIT_12s0028g01640
								VIT_08s0040g02600	VIT_05s0062g01430	VIT_00s0264g00040		VIT_18s0001g06400		VIT_12s0059g02020	VIT_05s0029g00400					VIT_16s0050g01900
								VIT_06s0009g01760	VIT_02s0154g00050	VIT_07s0005g01330		VIT_13s0064g01100		VIT_04s0069g00620	VIT_05s0020g00620					VIT_11s0016g03080
								VIT_07s0005g05660	VIT_00s0357g00060	VIT_17s0000g07760		VIT_10s0003g03810		VIT_04s0069g00740	VIT_18s0001g08700					VIT_07s0129g00990
								VIT_06s0080g00410	VIT_18s0001g10580	VIT_01s0011g03740		VIT_15s0048g02640		VIT_10s0003g00780	VIT_18s0001g02400					VIT_00s0409g00040
								VIT_10s0003g04880	VIT_07s0005g01040	VIT_03s0038g04100		VIT_09s0054g00570		VIT_04s0069g00540	VIT_18s0001g02410					VIT_19s0014g02620
								VIT_08s0058g00410	VIT_08s0056g00080	VIT_07s0031g01980		VIT_12s0034g01880		VIT_04s0069g00720	VIT_04s0023g01960					VIT_19s0014g04470
								VIT_09s0002g06530	VIT_08s0007g01300	VIT_07s0005g03230		VIT_06s0004g02010		VIT_10s0003g00760	VIT_08s0007g06460					VIT_10s0003g01900
								VIT_12s0057g00650	VIT_17s0000g00270	VIT_01s0146g00360		VIT_05s0049g00810		VIT_10s0003g00790	VIT_11s0016g03250					VIT_17s0000g08770
								VIT_17s0000g03930	VIT_06s0004g07810	VIT_12s0057g01350		VIT_08s0007g05630		VIT_08s0007g05260	VIT_04s0023g03040					VIT_19s0014g04310
								VIT_04s0023g02900	VIT_09s0002g04860	VIT_08s0058g00980		VIT_10s0116g01840		VIT_08s0007g04670	VIT_07s0005g03030					VIT_16s0148g00070
								VIT_19s0090g01440	VIT_01s0011g05230	VIT_14s0066g01850		VIT_07s0031g01260		VIT_17s0000g01910	VIT_13s0067g01450					VIT_14s0066g02670
								VIT_02s0154g00160	VIT_15s0048g03000	VIT_04s0008g07040		VIT_02s0025g01320		VIT_13s0064g00050	VIT_00s0340g00090					VIT_14s0066g00900
								VIT_00s0271g00110	VIT_13s0019g02720	VIT_11s0016g05010		VIT_14s0030g01230		VIT_01s0011g03740	VIT_07s0197g00040					VIT_16s0148g00010
								VIT_19s0014g04660	VIT_05s0102g00310	VIT_01s0011g05970		VIT_06s0009g03390		VIT_03s0097g00710	VIT_01s0011g03540					VIT_05s0020g03300
								VIT_11s0016g01020	VIT_14s0066g02550	VIT_11s0016g01990		VIT_12s0134g00170		VIT_13s0019g00340	VIT_13s0067g01180					VIT_04s0008g00330
								VIT_13s0047g00210	VIT_05s0020g04820	VIT_02s0087g00930		VIT_08s0007g05270		VIT_08s0007g05530	VIT_18s0001g08800					VIT_00s0262g00090
								VIT_10s0003g02430	VIT_05s0020g04840	VIT_02s0087g00710		VIT_06s0004g04660		VIT_05s0020g01750	VIT_08s0007g01620					VIT_18s0001g09820
								VIT_10s0003g02450	VIT_08s0007g05350	VIT_09s0002g03410		VIT_07s0031g02210		VIT_05s0051g00870	VIT_13s0320g00010					VIT_00s0437g00010
								VIT_19s0014g05040	VIT_15s0048g02530	VIT_09s0002g01900		VIT_05s0049g00660		VIT_10s0003g04470	VIT_08s0058g00280					VIT_00s0294g00010
								VIT_09s0002g02980	VIT_02s0025g01600	VIT_11s0016g04810		VIT_05s0049g00690		VIT_07s0005g04880	VIT_08s0040g02210					VIT_10s0071g00450
								VIT_09s0002g03010	VIT_06s0061g00850	VIT_05s0020g00670		VIT_01s0011g01810		VIT_07s0005g04890	VIT_13s0019g02040					VIT_00s2745g00010
								VIT_05s0102g00710	VIT_14s0066g02660	VIT_03s0091g01080		VIT_05s0049g00770		VIT_07s0005g00030	VIT_13s0019g03210					VIT_19s0014g04150
								VIT_04s0008g01170	VIT_00s0531g00010	VIT_10s0042g01250		VIT_09s0054g00560		VIT_12s0028g00930	VIT_16s0115g00160					VIT_04s0044g00660
								VIT_03s0038g04610	VIT_19s0014g05050	VIT_17s0000g07560		VIT_11s0016g05780		VIT_12s0028g00920	VIT_04s0023g02840					VIT_16s0050g02700
								VIT_09s0002g02480	VIT_16s0022g00510	VIT_17s0000g07370		VIT_05s0049g00610		VIT_12s0035g02110	VIT_07s0151g00470					VIT_06s0004g01400
								VIT_07s0005g00880	VIT_17s0000g07190	VIT_17s0000g07420		VIT_05s0124g00080		VIT_01s0010g02460	VIT_19s0027g00010					VIT_04s0044g00720
								VIT_00s0187g00340	VIT_13s0019g03170	VIT_00s0207g00130		VIT_09s0002g02950		VIT_02s0012g02160	VIT_11s0016g02900					VIT_01s0010g02430
								VIT_03s0063g00550	VIT_13s0019g02930	VIT_13s0019g00730		VIT_05s0049g00780		VIT_13s0158g00340	VIT_07s0129g01070					VIT_11s0016g02970
								VIT_04s0008g03160	VIT_13s0019g02780	VIT_13s0019g00750		VIT_03s0063g01150		VIT_11s0118g00710	VIT_01s0146g00340					VIT_06s0004g06840
								VIT_06s0009g02650	VIT_13s0019g02770	VIT_03s0038g03960		VIT_03s0063g01210		VIT_19s0090g01490	VIT_08s0058g01340					VIT_14s0060g02070
								VIT_14s0066g02350	VIT_13s0019g02740	VIT_04s0069g00790		VIT_03s0063g01160		VIT_14s0068g01500	VIT_13s0067g03050					VIT_04s0008g03530
								VIT_17s0000g05410	VIT_13s0019g02850	VIT_16s0050g02560		VIT_00s0229g00060		VIT_02s0012g01120	VIT_02s0025g04720					VIT_05s0029g01540
								VIT_02s0025g02440	VIT_13s0019g03000	VIT_15s0046g00980		VIT_04s0023g02730		VIT_00s0211g00120	VIT_01s0011g02960					VIT_19s0085g00850
								VIT_13s0074g00570	VIT_04s0008g01590	VIT_00s1306g00010		VIT_02s0012g00390		VIT_18s0001g04340	VIT_13s0067g03300					VIT_05s0051g00650
								VIT_11s0016g02830	VIT_04s0008g01490	VIT_00s0313g00040		VIT_17s0000g01410		VIT_00s0415g00040	VIT_19s0014g00160					VIT_15s0048g01200
								VIT_05s0051g00450	VIT_04s0008g01570	VIT_06s0009g01930		VIT_10s0003g00880		VIT_00s0274g00060	VIT_06s0009g00440					VIT_05s0077g00030
								VIT_05s0020g03710	VIT_13s0019g02820	VIT_17s0000g05520		VIT_06s0061g01070		VIT_03s0038g01950	VIT_02s0025g02310					VIT_09s0002g04020
								VIT_04s0008g04740	VIT_13s0019g02840	VIT_19s0090g00410		VIT_04s0023g03570		VIT_02s0241g00080	VIT_16s0100g00290					VIT_13s0067g00220
								VIT_02s0025g04090	VIT_16s0098g01060	VIT_13s0074g00100		VIT_13s0067g01120		VIT_00s1488g00020	VIT_03s0091g01010					VIT_04s0008g01720
								VIT_04s0023g03170	VIT_01s0010g02290	VIT_06s0004g03540		VIT_18s0001g00290		VIT_00s2563g00010	VIT_03s0091g00040					VIT_03s0038g02980
								VIT_14s0068g01360	VIT_18s0041g01230	VIT_06s0004g07920		VIT_19s0085g00910		VIT_06s0004g01420	VIT_03s0180g00200					VIT_07s0005g06110
								VIT_15s0048g01490	VIT_06s0004g04470	VIT_07s0129g00180		VIT_16s0050g01430		VIT_00s0220g00180	VIT_00s0271g00060					VIT_07s0005g06060
								VIT_02s0025g04880	VIT_13s0019g00930	VIT_11s0016g04750		VIT_18s0001g00740		VIT_05s0077g01280	VIT_10s0003g02110					VIT_01s0011g04210
								VIT_19s0090g00530	VIT_11s0037g00510	VIT_06s0080g00170		VIT_02s0025g04340		VIT_13s0067g01890	VIT_18s0041g02150					VIT_19s0015g01310
								VIT_17s0000g05360	VIT_00s1569g00010	VIT_01s0137g00690		VIT_02s0025g04260		VIT_19s0014g02650	VIT_14s0060g00680					VIT_19s0015g01290
								VIT_14s0128g00570	VIT_00s0194g00030			VIT_02s0025g02560		VIT_14s0066g00350	VIT_19s0090g00660					VIT_19s0015g01300
								VIT_09s0002g01320	VIT_19s0015g01090			VIT_18s0001g12310		VIT_13s0074g00090	VIT_12s0055g01140					VIT_03s0038g03530
								VIT_02s0025g03440	VIT_00s2341g00010			VIT_18s0001g03790		VIT_14s0108g01520	VIT_00s0304g00070					VIT_14s0171g00400
								VIT_07s0104g00930	VIT_02s0025g00280			VIT_01s0127g00490		VIT_00s0475g00010	VIT_06s0004g01510					VIT_13s0074g00570
								VIT_15s0048g01350	VIT_16s0050g01150			VIT_18s0001g13270		VIT_00s0455g00040	VIT_12s0142g00070					VIT_01s0011g01140
								VIT_15s0048g01390	VIT_02s0154g00480			VIT_04s0023g02450		VIT_01s0026g00980	VIT_06s0009g03450					VIT_05s0020g00440
								VIT_12s0028g02540	VIT_13s0073g00150			VIT_08s0007g05800		VIT_08s0007g08840	VIT_08s0007g08450					VIT_06s0009g00480
								VIT_06s0080g00420	VIT_00s0179g00150			VIT_18s0001g10910		VIT_17s0000g00160	VIT_01s0026g01060					VIT_06s0009g01110
								VIT_08s0007g06000	VIT_16s0100g00720			VIT_18s0001g10870		VIT_17s0000g09650	VIT_18s0001g10040					VIT_12s0028g02570
								VIT_13s0019g01180	VIT_02s0025g04170			VIT_18s0001g10850		VIT_08s0007g01300	VIT_18s0001g10060					VIT_19s0014g01720
								VIT_01s0146g00060	VIT_14s0128g00190			VIT_10s0116g00830		VIT_03s0038g02510	VIT_18s0001g10050					VIT_18s0041g00090
								VIT_12s0057g01030	VIT_07s0005g00050			VIT_18s0041g00430		VIT_12s0028g03800	VIT_08s0040g02810					VIT_06s0004g02710
								VIT_14s0171g00490	VIT_08s0040g02700			VIT_05s0077g01690		VIT_17s0119g00110	VIT_18s0001g11300					VIT_01s0011g00530
								VIT_18s0072g00080	VIT_05s0020g01450			VIT_05s0077g01570		VIT_10s0071g00320	VIT_01s0011g03180					VIT_08s0007g03570
								VIT_01s0011g06600	VIT_15s0046g02230			VIT_05s0077g01580		VIT_17s0000g00270	VIT_05s0077g01670					VIT_08s0007g08970
								VIT_10s0003g00790	VIT_07s0191g00210			VIT_05s0077g01560		VIT_07s0104g00550	VIT_17s0000g06270					VIT_01s0011g05850
								VIT_14s0006g02590	VIT_07s0104g00300			VIT_05s0077g01550		VIT_06s0004g04080	VIT_07s0005g03350					VIT_18s0001g12420
								VIT_12s0035g01700	VIT_17s0000g06880			VIT_18s0001g15650		VIT_03s0017g00650	VIT_18s0001g14910					VIT_08s0007g07630
								VIT_03s0097g00710	VIT_11s0149g00050			VIT_18s0001g15640		VIT_07s0191g00190	VIT_04s0044g00190					VIT_11s0103g00050
								VIT_14s0060g00110	VIT_14s0006g02720			VIT_14s0081g00050		VIT_18s0001g13310	VIT_04s0008g01310					VIT_07s0104g01730
								VIT_05s0020g01750	VIT_10s0071g00870			VIT_14s0081g00030		VIT_07s0031g03050	VIT_07s0031g00330					VIT_17s0000g01930
								VIT_17s0000g02320	VIT_02s0025g01220			VIT_18s0001g15660		VIT_08s0007g08290	VIT_13s0084g00080					VIT_01s0011g03020
								VIT_10s0003g00390	VIT_08s0007g02200			VIT_08s0040g02740		VIT_08s0007g08260	VIT_08s0007g05140					VIT_14s0219g00130
								VIT_13s0067g01650	VIT_01s0011g05360			VIT_13s0047g00230		VIT_13s0019g03480	VIT_04s0008g04490					VIT_16s0098g00690
								VIT_05s0051g00870	VIT_13s0067g00640			VIT_17s0000g05960		VIT_00s0207g00070	VIT_00s0225g00070					VIT_00s0304g00020
								VIT_07s0141g00390	VIT_01s0011g06190			VIT_16s0098g01900		VIT_19s0014g02480	VIT_08s0056g01070					VIT_13s0047g00010
								VIT_19s0027g00460	VIT_18s0001g04100			VIT_09s0002g00330		VIT_17s0000g09910	VIT_10s0116g01880					VIT_17s0119g00080
								VIT_19s0015g02890	VIT_17s0000g07280			VIT_09s0002g00320		VIT_14s0060g01030	VIT_00s0225g00080					VIT_07s0005g03290
								VIT_19s0015g02730	VIT_04s0023g03130			VIT_14s0108g00970		VIT_00s0324g00110	VIT_15s0107g00270					VIT_05s0020g03140
								VIT_05s0049g01100	VIT_07s0005g01060			VIT_19s0014g00170		VIT_08s0007g05350	VIT_13s0019g02700					VIT_11s0016g03400
								VIT_07s0005g04880	VIT_00s0179g00340			VIT_05s0049g01550		VIT_04s0008g00450	VIT_11s0016g02770					VIT_00s0181g00010
								VIT_05s0049g01120	VIT_09s0002g05780			VIT_01s0011g06620		VIT_05s0020g03190	VIT_04s0023g01600					VIT_16s0013g01950
								VIT_05s0049g01090	VIT_07s0104g00960			VIT_16s0100g00270		VIT_08s0007g02360	VIT_09s0002g04240					VIT_18s0001g05570
								VIT_00s0240g00050	VIT_06s0004g01710			VIT_03s0038g01930		VIT_16s0098g00890	VIT_07s0129g00620					VIT_07s0104g00830
								VIT_08s0007g01410	VIT_18s0072g00800			VIT_12s0055g01020		VIT_06s0009g01620	VIT_00s0218g00100					VIT_03s0063g02250
								VIT_00s0153g00050	VIT_06s0004g04370			VIT_14s0066g01850		VIT_12s0142g00390	VIT_18s0001g11940					VIT_09s0054g01610
								VIT_06s0004g05700	VIT_07s0005g04190			VIT_06s0004g07770		VIT_08s0058g00090	VIT_14s0066g01960					VIT_00s0225g00060
								VIT_12s0028g00920	VIT_17s0000g02550			VIT_12s0055g01030		VIT_05s0029g01000	VIT_08s0007g00330					VIT_12s0059g02180
								VIT_14s0060g02170	VIT_07s0031g01940			VIT_14s0068g01920		VIT_13s0019g02850	VIT_06s0004g04640					VIT_05s0077g02090
								VIT_14s0030g00030	VIT_18s0001g03760			VIT_18s0072g00160		VIT_07s0031g00670	VIT_14s0068g01710					VIT_12s0028g01150
								VIT_18s0001g01690	VIT_09s0002g03740			VIT_07s0129g00360		VIT_10s0003g01770	VIT_06s0004g04170					VIT_08s0056g00780
								VIT_07s0005g00260	VIT_18s0001g08380			VIT_05s0049g01420		VIT_04s0008g01110	VIT_15s0024g00070					VIT_10s0003g01460
								VIT_19s0085g00600	VIT_10s0116g00190			VIT_07s0104g00220		VIT_16s0100g00720	VIT_14s0030g01370					VIT_01s0026g00740
								VIT_01s0010g02460	VIT_02s0025g02590			VIT_07s0104g00200		VIT_02s0025g04170	VIT_14s0128g00330					VIT_04s0023g03570
								VIT_16s0022g00540	VIT_07s0191g00180			VIT_07s0104g00210		VIT_01s0011g05970	VIT_06s0004g06730					VIT_03s0097g00510
								VIT_13s0158g00340	VIT_18s0001g06430			VIT_16s0039g01360		VIT_00s2419g00010	VIT_16s0022g01820					VIT_01s0011g02520
								VIT_11s0118g00710	VIT_16s0098g01170			VIT_16s0039g01100		VIT_02s0025g00350	VIT_01s0026g02120					VIT_01s0182g00140
								VIT_19s0090g01490	VIT_15s0048g02870			VIT_16s0039g01130		VIT_03s0038g02440	VIT_07s0129g01080					VIT_11s0016g05170
								VIT_14s0068g01500	VIT_10s0003g04670			VIT_16s0039g01110		VIT_08s0040g01370	VIT_08s0056g01130					VIT_18s0041g00520
								VIT_00s1343g00010	VIT_06s0004g02800			VIT_13s0019g04460		VIT_16s0050g00140	VIT_01s0150g00390					VIT_18s0041g00490
								VIT_00s0415g00040	VIT_05s0020g03860			VIT_16s0039g01170		VIT_12s0057g01440	VIT_10s0003g03080					VIT_17s0000g05550
								VIT_03s0038g01950	VIT_11s0016g02440			VIT_01s0182g00140		VIT_01s0011g04700	VIT_03s0038g00300					VIT_01s0011g06620
								VIT_00s2563g00010	VIT_10s0003g00330			VIT_03s0038g03860		VIT_16s0050g01250	VIT_03s0038g02370					VIT_09s0002g04130
								VIT_18s0001g15580	VIT_00s0323g00030			VIT_18s0001g06180		VIT_06s0061g00440	VIT_11s0149g00130					VIT_01s0026g01570
								VIT_09s0002g09050	VIT_10s0003g03510			VIT_18s0001g06140		VIT_16s0050g01240	VIT_00s0184g00040					VIT_13s0067g03200
								VIT_07s0005g00410	VIT_08s0007g00740			VIT_18s0001g06170		VIT_14s0068g00810	VIT_05s0020g00480					VIT_11s0016g04160
								VIT_05s0077g01280	VIT_03s0063g02190			VIT_18s0001g06150		VIT_04s0008g02040	VIT_10s0003g04040					VIT_06s0004g05070
								VIT_18s0001g05160	VIT_18s0001g09360			VIT_18s0001g06020		VIT_06s0061g00040	VIT_15s0021g01920					VIT_02s0012g00740
								VIT_08s0007g05100	VIT_07s0129g00490			VIT_15s0045g00370		VIT_16s0013g01950	VIT_18s0001g13010					VIT_02s0154g00080
								VIT_14s0108g01520	VIT_18s0001g06010			VIT_15s0046g00440		VIT_11s0118g00180	VIT_03s0091g00710					VIT_00s0253g00040
								VIT_08s0007g08840	VIT_18s0089g01420			VIT_00s2840g00010		VIT_05s0029g00130	VIT_01s0010g02430					VIT_16s0022g00680
								VIT_01s0011g04680	VIT_15s0046g01190			VIT_00s1995g00010		VIT_18s0001g00660	VIT_07s0005g00510					VIT_11s0016g05840
								VIT_01s0150g00150	VIT_13s0067g00180			VIT_00s2576g00010		VIT_08s0007g02200	VIT_07s0141g00540					VIT_06s0004g00910
								VIT_14s0030g01450	VIT_12s0028g00630			VIT_15s0045g00380		VIT_07s0005g06410	VIT_12s0059g02360					VIT_02s0154g00310
								VIT_17s0000g09650	VIT_04s0008g05890			VIT_14s0108g00540		VIT_13s0067g00640	VIT_10s0116g01760					VIT_06s0004g08060
								VIT_18s0041g01830	VIT_14s0068g00270			VIT_02s0025g04620		VIT_01s0010g03780	VIT_10s0116g00500					VIT_09s0002g05560
								VIT_02s0025g03430	VIT_08s0007g07660			VIT_15s0048g01160		VIT_02s0154g00530	VIT_17s0000g04130					VIT_16s0050g01620
								VIT_09s0002g05230	VIT_05s0020g03470			VIT_05s0077g01830		VIT_04s0008g00210	VIT_06s0004g06100					VIT_05s0020g00680
								VIT_01s0026g02630	VIT_15s0046g01090			VIT_02s0025g03600		VIT_04s0044g01510	VIT_08s0007g01920					VIT_19s0015g00060
								VIT_03s0132g00150	VIT_18s0072g00480			VIT_13s0047g01210		VIT_04s0008g00910	VIT_01s0026g02600					VIT_03s0017g01300
								VIT_00s0174g00200	VIT_14s0081g00010			VIT_01s0011g02480		VIT_18s0001g01700	VIT_14s0108g01080					VIT_19s0015g00050
								VIT_12s0028g02640	VIT_07s0141g00290			VIT_17s0000g05700		VIT_05s0020g03860	VIT_14s0006g01290					VIT_08s0007g05060
								VIT_08s0007g08260	VIT_11s0052g00870			VIT_18s0001g09110		VIT_08s0007g00740	VIT_14s0006g01340					VIT_19s0015g00020
								VIT_08s0007g00190	VIT_05s0020g04690			VIT_07s0031g02390		VIT_17s0000g08240	VIT_07s0005g01210					VIT_09s0002g05590
								VIT_04s0008g02460	VIT_18s0001g08090			VIT_05s0077g01470		VIT_04s0023g02010	VIT_11s0016g01320					VIT_01s0011g02730
								VIT_07s0104g01730	VIT_09s0002g04080			VIT_03s0088g00290		VIT_13s0158g00180	VIT_03s0038g02310					VIT_13s0019g04600
								VIT_01s0011g03020	VIT_01s0011g06340			VIT_17s0053g00460		VIT_07s0151g00860	VIT_04s0023g03710					VIT_09s0002g05570
								VIT_08s0007g00540	VIT_08s0058g00540			VIT_19s0090g01530		VIT_09s0002g07500	VIT_14s0006g01620					VIT_09s0002g04720
								VIT_04s0008g00450	VIT_10s0003g01550			VIT_18s0001g06610		VIT_17s0000g06180	VIT_04s0008g01810					VIT_10s0092g00360
								VIT_05s0020g03190	VIT_17s0000g08680			VIT_11s0016g05530		VIT_18s0089g01420	VIT_17s0000g02660					VIT_08s0007g02340
								VIT_04s0069g01010	VIT_05s0077g01430			VIT_02s0012g01400		VIT_18s0001g05710	VIT_14s0060g00240					VIT_08s0040g02730
								VIT_13s0019g02030	VIT_01s0010g02090			VIT_08s0007g07880		VIT_06s0004g00580	VIT_04s0008g01800					VIT_16s0039g02010
								VIT_11s0016g05750	VIT_04s0008g01160			VIT_04s0044g01420		VIT_05s0102g01180	VIT_17s0000g02650					VIT_07s0005g01220
								VIT_12s0142g00390	VIT_14s0068g00500			VIT_05s0094g01300		VIT_12s0057g00930	VIT_14s0083g00120					VIT_12s0028g02240
								VIT_11s0016g04250	VIT_17s0000g00330			VIT_06s0004g01750		VIT_06s0004g02900	VIT_08s0007g00410					VIT_07s0031g01160
								VIT_08s0040g03280	VIT_08s0040g02470			VIT_00s0480g00030		VIT_09s0002g01890	VIT_00s0203g00170					VIT_18s0075g00520
								VIT_08s0058g00090	VIT_05s0094g01420			VIT_10s0116g00560		VIT_05s0020g00920	VIT_17s0000g06190					VIT_09s0002g01300
								VIT_00s0400g00020	VIT_05s0020g03770			VIT_00s0480g00040		VIT_02s0025g03290	VIT_09s0054g01620					VIT_08s0056g00640
								VIT_00s0397g00010	VIT_07s0031g00920			VIT_04s0008g04510		VIT_15s0046g01090	VIT_01s0137g00050					VIT_18s0001g08100
								VIT_14s0068g02240	VIT_08s0007g00980			VIT_00s0125g00190		VIT_01s0146g00330	VIT_13s0019g03370					VIT_15s0048g02230
								VIT_16s0050g01550	VIT_13s0019g00890			VIT_14s0219g00130		VIT_07s0031g01160	VIT_17s0000g07510					VIT_05s0077g02330
								VIT_16s0050g00170	VIT_13s0019g00900			VIT_14s0219g00120		VIT_13s0067g02300	VIT_01s0026g01050					VIT_16s0050g01250
								VIT_16s0050g00200	VIT_03s0091g00760			VIT_03s0091g00450		VIT_05s0077g02320	VIT_15s0046g02260					VIT_12s0028g01780
								VIT_01s0011g05710	VIT_15s0046g01530			VIT_03s0088g01180		VIT_01s0026g00820	VIT_04s0043g00340					VIT_10s0003g05380
								VIT_04s0008g01520	VIT_02s0025g00840			VIT_14s0066g02170		VIT_17s0000g05320	VIT_02s0012g01940					VIT_03s0180g00080
								VIT_16s0098g01580	VIT_16s0022g00870			VIT_00s0264g00040		VIT_03s0063g00060	VIT_16s0039g01900					VIT_08s0007g00470
								VIT_19s0090g00340	VIT_01s0011g05390			VIT_18s0001g00510		VIT_08s0007g01450	VIT_17s0000g06410					VIT_03s0063g01790
								VIT_12s0028g01410	VIT_11s0016g00590			VIT_01s0127g00560		VIT_06s0004g05740	VIT_15s0046g01130					VIT_07s0130g00200
								VIT_05s0029g00350	VIT_00s0323g00060			VIT_13s0019g04160		VIT_18s0001g08320	VIT_15s0046g00170					VIT_12s0028g03190
								VIT_10s0597g00050	VIT_00s0323g00050			VIT_18s0001g03810		VIT_11s0118g00250	VIT_04s0008g03780					VIT_18s0001g02780
								VIT_08s0007g08750	VIT_01s0011g05410			VIT_19s0014g01530		VIT_18s0001g12260	VIT_13s0067g02400					VIT_03s0038g03860
								VIT_08s0007g03900	VIT_06s0004g05560			VIT_00s0772g00010		VIT_14s0060g02440	VIT_08s0040g02400					VIT_18s0001g06170
								VIT_01s0011g05970	VIT_05s0094g01390			VIT_19s0027g00390		VIT_01s0010g02090	VIT_19s0093g00590					VIT_05s0077g00870
								VIT_12s0057g01430	VIT_01s0127g00450			VIT_01s0011g03800		VIT_04s0008g01160	VIT_06s0004g02360					VIT_02s0025g00350
								VIT_16s0050g01240	VIT_17s0000g07990			VIT_17s0000g01460		VIT_13s0019g03040	VIT_00s0271g00030					VIT_04s0008g02220
								VIT_14s0066g00880	VIT_18s0001g06520			VIT_03s0038g03800		VIT_01s0011g05290	VIT_08s0040g02110					VIT_11s0016g02110
								VIT_08s0007g08400	VIT_11s0078g00310			VIT_18s0122g01270		VIT_18s0122g00780	VIT_01s0146g00280					VIT_00s0317g00110
								VIT_05s0020g02610	VIT_10s0042g01020			VIT_06s0004g04580		VIT_05s0049g00940	VIT_02s0025g02710					VIT_18s0001g13670
								VIT_14s0066g00480	VIT_03s0038g04700			VIT_08s0007g04850		VIT_05s0049g00930	VIT_03s0091g00530					VIT_01s0011g04030
								VIT_18s0117g00150	VIT_17s0000g05580			VIT_02s0087g00750		VIT_08s0040g02470	VIT_06s0004g06950					VIT_10s0003g05550
								VIT_04s0008g02040	VIT_18s0001g12880			VIT_12s0035g01820		VIT_05s0020g02200	VIT_07s0005g00630					VIT_06s0004g01670
								VIT_13s0067g01780	VIT_01s0026g00270			VIT_15s0021g00330		VIT_14s0030g00420	VIT_16s0050g01490					VIT_18s0001g06150
								VIT_14s0068g00910	VIT_07s0005g02700			VIT_07s0104g00850		VIT_01s0011g01800	VIT_08s0056g01150					VIT_16s0050g00750
								VIT_12s0057g00690	VIT_10s0003g02800			VIT_10s0003g01730		VIT_02s0012g00550	VIT_11s0037g00070					VIT_18s0001g10180
								VIT_00s0757g00030	VIT_09s0002g07110			VIT_04s0044g01460		VIT_10s0405g00050	VIT_09s0002g03620					VIT_18s0001g06020
								VIT_18s0072g00940	VIT_11s0016g05050			VIT_18s0001g06940		VIT_08s0058g00680	VIT_12s0059g00670					VIT_02s0025g02420
								VIT_18s0001g03600	VIT_04s0008g02380			VIT_18s0001g06950		VIT_09s0018g01790	VIT_01s0011g06430					VIT_08s0040g01200
								VIT_01s0011g04480	VIT_17s0000g05920			VIT_18s0001g06910		VIT_06s0009g02450	VIT_08s0040g00600					VIT_12s0028g01770
								VIT_06s0061g01240	VIT_05s0094g01590			VIT_15s0021g00650		VIT_04s0044g01100	VIT_15s0024g00910					VIT_04s0044g00270
								VIT_07s0104g00970	VIT_13s0074g00620			VIT_03s0038g00220		VIT_16s0022g00890	VIT_02s0087g00340					VIT_18s0001g06140
								VIT_13s0019g05370	VIT_12s0057g01080			VIT_11s0118g00240		VIT_16s0022g00860	VIT_01s0026g00330					VIT_12s0028g01790
								VIT_18s0001g13680	VIT_08s0007g07120			VIT_14s0060g01280		VIT_19s0027g00700	VIT_01s0026g00320					VIT_04s0044g00220
								VIT_18s0072g00210	VIT_19s0014g01440			VIT_14s0060g00420		VIT_07s0031g01730	VIT_01s0026g00630					VIT_17s0000g03260
								VIT_18s0001g01700	VIT_01s0026g02270			VIT_08s0007g05430		VIT_18s0001g06520	VIT_10s0003g01490					VIT_10s0003g04090
								VIT_18s0001g01740	VIT_17s0053g00590			VIT_16s0050g02660		VIT_11s0078g00310	VIT_01s0127g00230					VIT_06s0004g07270
								VIT_04s0008g03250	VIT_19s0015g01150			VIT_08s0007g05490		VIT_03s0038g00360	VIT_14s0030g01870					VIT_01s0011g00470
								VIT_10s0003g00290	VIT_17s0000g04330			VIT_00s0179g00350		VIT_12s0028g01880	VIT_07s0151g00310					VIT_07s0031g00610
								VIT_10s0003g00380	VIT_18s0001g07550			VIT_05s0020g02310		VIT_05s0020g01550	VIT_06s0004g01830					VIT_05s0094g01230
								VIT_01s0011g03500	VIT_19s0014g05070			VIT_02s0025g02920		VIT_07s0104g00270	VIT_17s0000g05640					VIT_16s0098g00460
								VIT_05s0049g01360	VIT_17s0000g03290			VIT_07s0151g00260		VIT_12s0134g00040	VIT_16s0098g01640					VIT_13s0067g01890
								VIT_04s0023g01850	VIT_06s0009g00820			VIT_18s0001g03260		VIT_06s0004g03140	VIT_16s0098g00600					VIT_06s0004g07250
								VIT_13s0067g00700	VIT_06s0004g03810			VIT_18s0117g00360		VIT_12s0035g00900	VIT_14s0066g01370					VIT_01s0137g00700
								VIT_18s0001g05710	VIT_19s0090g01600			VIT_18s0001g11250		VIT_17s0000g02230	VIT_01s0011g02500					VIT_18s0001g02760
								VIT_03s0063g02650	VIT_08s0040g02590			VIT_15s0024g00400		VIT_10s0003g03790	VIT_12s0059g01410					VIT_14s0108g01630
								VIT_12s0059g01060	VIT_19s0027g00080			VIT_10s0003g00550		VIT_11s0016g00710	VIT_09s0002g03260					VIT_10s0003g04080
								VIT_11s0037g00440	VIT_05s0020g00620			VIT_04s0008g03930		VIT_00s0282g00020	VIT_18s0001g01200					VIT_11s0016g04230
								VIT_06s0009g02640	VIT_03s0063g01120			VIT_16s0098g00190		VIT_14s0066g01580	VIT_07s0005g05180					VIT_14s0060g01830
								VIT_06s0061g00030	VIT_05s0049g01350			VIT_16s0050g01690		VIT_09s0002g05080	VIT_13s0067g02420					VIT_18s0001g00840
								VIT_01s0011g06270	VIT_07s0031g00130			VIT_05s0062g00760		VIT_01s0026g02080	VIT_12s0028g03170					VIT_01s0026g01020
								VIT_19s0015g00930	VIT_17s0000g04560			VIT_00s0262g00120		VIT_09s0054g00620	VIT_05s0051g00700					VIT_08s0007g07700
								VIT_02s0025g03290	VIT_01s0127g00210			VIT_00s0429g00010		VIT_08s0056g00510	VIT_02s0025g01960					VIT_03s0091g00550
								VIT_12s0028g03740	VIT_13s0019g03360			VIT_17s0000g09170		VIT_17s0000g08260	VIT_17s0000g10370					VIT_07s0104g00500
								VIT_14s0068g01470	VIT_04s0008g03210			VIT_19s0015g02410		VIT_00s0407g00080	VIT_04s0023g01010					VIT_13s0156g00160
								VIT_07s0255g00010	VIT_18s0001g06370			VIT_10s0092g00710		VIT_18s0001g13580	VIT_11s0037g00910					VIT_01s0026g00030
								VIT_12s0059g01710	VIT_17s0000g04910			VIT_19s0014g03400		VIT_00s0313g00080	VIT_01s0146g00420					VIT_02s0236g00020
								VIT_07s0031g01160	VIT_05s0094g01520			VIT_12s0059g02590		VIT_04s0008g06130	VIT_16s0039g02430					VIT_13s0064g01330
								VIT_18s0001g02520	VIT_07s0005g03020			VIT_16s0098g00200		VIT_11s0118g00800	VIT_18s0164g00050					VIT_06s0004g05650
								VIT_04s0008g04410	VIT_07s0129g00330			VIT_16s0050g01700		VIT_11s0016g01820	VIT_18s0001g07110					VIT_10s0003g05230
								VIT_09s0096g00090	VIT_19s0027g01120			VIT_18s0001g08230		VIT_04s0008g05490	VIT_00s0194g00340					VIT_13s0147g00100
								VIT_14s0060g02300	VIT_17s0000g03720			VIT_10s0003g04090		VIT_03s0038g02320	VIT_18s0001g01530					VIT_01s0011g02390
								VIT_05s0077g02320	VIT_14s0108g01160			VIT_14s0060g02320		VIT_19s0014g03410	VIT_05s0049g00660					VIT_14s0066g00060
								VIT_01s0026g00820	VIT_00s0220g00070			VIT_16s0100g01110		VIT_07s0005g00660	VIT_05s0077g00630					VIT_15s0048g02910
								VIT_11s0016g02700	VIT_07s0031g02010			VIT_16s0100g01070		VIT_06s0004g03330	VIT_06s0080g00600					VIT_18s0001g15130
								VIT_09s0002g02630	VIT_14s0083g00400			VIT_10s0003g05430		VIT_14s0066g01710	VIT_05s0077g01920					VIT_02s0025g04960
								VIT_18s0001g02570	VIT_00s0956g00020			VIT_10s0003g05450		VIT_14s0083g00400	VIT_00s0125g00200					VIT_18s0001g15230
								VIT_14s0081g00320	VIT_01s0011g01830			VIT_09s0002g01300		VIT_01s0026g00810	VIT_11s0037g00940					VIT_10s0003g00220
								VIT_19s0090g00810	VIT_09s0002g01550			VIT_18s0075g00520		VIT_15s0024g00410	VIT_14s0068g00150					VIT_12s0057g01510
								VIT_03s0063g00060	VIT_08s0007g01620			VIT_01s0137g00460		VIT_18s0001g13210	VIT_00s0407g00050					VIT_01s0010g02240
								VIT_19s0085g00820	VIT_09s0002g02620			VIT_18s0001g00610		VIT_08s0007g01230	VIT_05s0049g00740					VIT_18s0001g00040
								VIT_01s0011g03660	VIT_09s0002g02610			VIT_01s0011g04630		VIT_08s0007g00810	VIT_08s0032g00340					VIT_08s0007g06500
								VIT_06s0004g05820	VIT_08s0058g00280			VIT_13s0019g02050		VIT_12s0028g03580	VIT_10s0042g00060					VIT_12s0034g01890
								VIT_02s0025g02990	VIT_16s0098g00720			VIT_19s0014g02900		VIT_14s0108g00340	VIT_17s0000g02850					VIT_03s0088g00490
								VIT_11s0016g03110	VIT_08s0040g02210			VIT_18s0001g06670		VIT_18s0001g15720	VIT_14s0083g00290					VIT_11s0016g02920
								VIT_12s0057g00900	VIT_13s0019g03210			VIT_07s0191g00230		VIT_02s0012g01010	VIT_14s0083g00260					VIT_14s0068g02150
								VIT_14s0068g01510	VIT_06s0004g04060			VIT_02s0025g00140		VIT_10s0092g00590	VIT_05s0049g00720					VIT_13s0156g00150
								VIT_08s0007g00350	VIT_12s0035g00070			VIT_18s0001g06790		VIT_05s0020g03030	VIT_05s0077g01910					VIT_14s0066g00020
								VIT_03s0097g00590	VIT_11s0118g00480			VIT_10s0003g01920		VIT_12s0035g02090	VIT_18s0072g00360					VIT_19s0014g02100
								VIT_01s0011g02340	VIT_04s0023g02840			VIT_12s0028g01350		VIT_04s0023g03070	VIT_07s0005g06160					VIT_05s0020g04560
								VIT_05s0062g01180	VIT_10s0092g00590			VIT_19s0014g00830		VIT_19s0014g00750	VIT_07s0104g01300					VIT_05s0049g00560
								VIT_14s0060g02440	VIT_07s0151g00470			VIT_19s0014g00710		VIT_03s0091g00560	VIT_14s0068g00190					VIT_17s0000g03960
								VIT_18s0001g12220	VIT_10s0003g05030			VIT_10s0003g01900		VIT_00s0125g00090	VIT_06s0004g02650					VIT_11s0016g01620
								VIT_03s0180g00320	VIT_02s0025g01400			VIT_10s0003g01940		VIT_03s0063g02600	VIT_14s0030g01220					VIT_06s0004g00960
								VIT_06s0004g07230	VIT_12s0142g00760			VIT_05s0077g01090		VIT_17s0000g09710	VIT_05s0102g00620					VIT_19s0015g00610
								VIT_03s0180g00280	VIT_01s0146g00340			VIT_17s0000g08720		VIT_07s0031g02310	VIT_05s0051g00530					VIT_01s0011g04780
								VIT_07s0104g00800	VIT_17s0000g01700			VIT_12s0034g02220		VIT_11s0118g00360	VIT_14s0006g03100					VIT_01s0150g00410
								VIT_03s0091g00310	VIT_08s0058g01340			VIT_04s0008g01220		VIT_15s0024g00040	VIT_00s0194g00190					VIT_07s0005g04340
								VIT_12s0057g01240	VIT_07s0031g02310			VIT_13s0019g03610		VIT_15s0046g03370	VIT_05s0049g00730					VIT_17s0000g02600
								VIT_05s0020g05020	VIT_16s0100g00710			VIT_12s0028g03200		VIT_04s0023g01030	VIT_08s0007g02040					VIT_12s0034g01870
								VIT_05s0020g05000	VIT_17s0000g04150			VIT_01s0011g00420		VIT_18s0001g14760	VIT_05s0102g00600					VIT_08s0007g07490
								VIT_18s0122g00780	VIT_13s0067g03300			VIT_12s0035g01330		VIT_05s0077g00480	VIT_08s0007g05630					VIT_05s0077g01370
								VIT_05s0020g02200	VIT_08s0007g05710			VIT_05s0029g00870		VIT_05s0077g00490	VIT_10s0116g01580					VIT_13s0067g02530
								VIT_08s0007g03690	VIT_12s0028g00320			VIT_18s0122g01290		VIT_18s0001g08500	VIT_06s0009g03390					VIT_12s0034g01950
								VIT_00s0229g00190	VIT_13s0019g04140			VIT_09s0002g00810		VIT_18s0001g08510	VIT_02s0025g00300					VIT_01s0011g02320
								VIT_02s0012g00550	VIT_01s0010g03620			VIT_10s0003g03830		VIT_08s0007g03670	VIT_18s0001g14640					VIT_05s0049g01470
								VIT_01s0011g06310	VIT_15s0024g00040			VIT_14s0083g00580		VIT_07s0104g00620	VIT_12s0028g03120					VIT_09s0002g04580
								VIT_10s0405g00050	VIT_17s0000g06350			VIT_01s0011g05930		VIT_10s0003g02100	VIT_09s0002g09020					VIT_05s0049g00800
								VIT_08s0040g02520	VIT_12s0057g00630			VIT_06s0004g00030		VIT_14s0066g00250	VIT_17s0000g09800					VIT_08s0007g03220
								VIT_07s0104g01350	VIT_00s0181g00180			VIT_14s0066g01820		VIT_09s0002g00570	VIT_11s0016g04670					VIT_01s0010g03680
								VIT_19s0014g00380	VIT_08s0007g02190			VIT_03s0091g00690		VIT_18s0001g10680	VIT_05s0020g01900					VIT_04s0023g03360
								VIT_02s0012g01730	VIT_18s0089g01170			VIT_18s0001g09230		VIT_14s0128g00780	VIT_13s0064g01060					VIT_16s0013g00070
								VIT_18s0001g09170	VIT_12s0055g01110			VIT_04s0069g00860		VIT_06s0004g01470	VIT_17s0000g05470					VIT_14s0066g00070
								VIT_16s0098g01260	VIT_10s0003g02890			VIT_13s0019g01810		VIT_02s0012g00310	VIT_03s0063g01150					VIT_04s0023g01890
								VIT_12s0035g01990	VIT_07s0005g02220			VIT_06s0004g04970		VIT_08s0056g01690	VIT_06s0061g00590					VIT_19s0014g02770
								VIT_18s0072g01040	VIT_10s0003g02900			VIT_13s0019g01710		VIT_00s0370g00010	VIT_11s0052g00570					VIT_13s0067g00700
								VIT_04s0044g01100	VIT_19s0014g00160			VIT_06s0004g04950		VIT_11s0016g01880	VIT_00s0229g00060					VIT_19s0090g00510
								VIT_00s0187g00290	VIT_19s0014g03660			VIT_06s0004g04960		VIT_04s0023g01080	VIT_01s0026g00550					VIT_12s0035g00530
								VIT_18s0122g00970	VIT_00s0204g00170			VIT_14s0066g00590		VIT_03s0038g03530	VIT_14s0066g01650					VIT_06s0061g01370
								VIT_08s0058g00740	VIT_13s0019g02430			VIT_18s0001g15270		VIT_18s0001g14030	VIT_18s0001g13360					VIT_19s0027g01850
								VIT_08s0007g03330	VIT_17s0000g07820			VIT_18s0001g12420		VIT_06s0004g00590	VIT_07s0104g01340					VIT_11s0016g03760
								VIT_08s0040g01700	VIT_18s0001g09040			VIT_08s0007g02660		VIT_14s0171g00400	VIT_18s0001g15330					VIT_03s0088g01160
								VIT_03s0038g03120	VIT_03s0091g01010			VIT_07s0141g00020		VIT_17s0000g01010	VIT_08s0058g01210					VIT_03s0063g01800
								VIT_14s0066g00950	VIT_12s0028g00510			VIT_16s0148g00320		VIT_11s0052g00040	VIT_13s0067g02910					VIT_14s0108g00930
								VIT_04s0079g00530	VIT_08s0007g03670			VIT_08s0040g01130		VIT_01s0011g00450	VIT_01s0011g05730					VIT_19s0014g01370
								VIT_10s0003g00470	VIT_12s0055g01140			VIT_05s0077g00560		VIT_01s0011g05060	VIT_08s0032g01190					VIT_14s0066g01570
								VIT_10s0003g03790	VIT_00s0304g00070			VIT_11s0037g00740		VIT_16s0039g01770	VIT_01s0010g03550					VIT_04s0023g03740
								VIT_10s0003g03800	VIT_11s0206g00120			VIT_03s0088g00260		VIT_19s0014g01640	VIT_19s0085g00520					VIT_14s0066g00100
								VIT_11s0016g00710	VIT_17s0000g09690			VIT_13s0019g04030		VIT_13s0019g05250	VIT_01s0011g00400					VIT_16s0039g02440
								VIT_19s0015g00320	VIT_08s0007g02270			VIT_01s0011g04900		VIT_03s0088g01190	VIT_13s0147g00100					VIT_13s0084g00830
								VIT_14s0068g02150	VIT_02s0012g00990			VIT_04s0008g05350		VIT_00s0615g00030	VIT_12s0059g01280					VIT_02s0012g01590
								VIT_06s0004g02980	VIT_12s0142g00070			VIT_04s0008g05380		VIT_04s0044g01290	VIT_00s0813g00010					VIT_04s0008g04200
								VIT_01s0026g02080	VIT_07s0005g00100			VIT_18s0041g01290		VIT_12s0142g00130	VIT_10s0003g01460					VIT_16s0050g01920
								VIT_01s0127g00250	VIT_05s0051g00540			VIT_19s0014g04090		VIT_06s0004g03540	VIT_01s0026g00740					VIT_00s0499g00020
								VIT_17s0000g10130	VIT_03s0063g00010			VIT_19s0014g04130		VIT_11s0016g02580	VIT_15s0021g01330					VIT_06s0004g01730
								VIT_10s0003g01180	VIT_08s0058g01370			VIT_10s0071g00440		VIT_06s0004g03620	VIT_14s0068g00870					VIT_06s0004g04490
								VIT_12s0028g02340	VIT_12s0034g01090			VIT_19s0014g04080		VIT_06s0004g06850	VIT_10s0003g00880					VIT_16s0050g00430
								VIT_06s0004g01290	VIT_08s0007g08340			VIT_06s0004g01130		VIT_00s1194g00010	VIT_08s0007g05200					VIT_08s0007g08460
								VIT_01s0026g02650	VIT_13s0064g00740			VIT_05s0077g00550		VIT_00s0567g00010	VIT_00s0253g00060					VIT_07s0031g02770
								VIT_14s0108g01040	VIT_16s0022g02380			VIT_15s0048g02010		VIT_08s0058g00510	VIT_13s0019g01410					VIT_03s0017g02210
								VIT_13s0019g05360	VIT_17s0000g04990			VIT_14s0030g00650		VIT_10s0116g01860	VIT_00s0245g00050					VIT_00s0259g00170
								VIT_13s0019g00590	VIT_15s0048g01250			VIT_14s0030g00660		VIT_07s0031g00750	VIT_00s0259g00140					VIT_05s0020g00610
								VIT_06s0004g02560	VIT_17s0000g01230			VIT_16s0039g02500		VIT_02s0025g04420	VIT_02s0025g02390					VIT_14s0066g00050
								VIT_18s0001g01280	VIT_08s0040g00390			VIT_08s0040g03400		VIT_00s0477g00030	VIT_18s0001g00280					VIT_00s0261g00040
								VIT_18s0001g00850	VIT_16s0098g00690			VIT_12s0055g00590		VIT_18s0001g08200	VIT_18s0001g10740					VIT_09s0002g02970
								VIT_18s0075g00670	VIT_07s0205g00120			VIT_10s0092g00470		VIT_03s0038g02980	VIT_01s0026g02290					VIT_00s0179g00320
								VIT_00s0444g00010	VIT_01s0011g05120			VIT_12s0134g00450		VIT_18s0001g07500	VIT_18s0001g12780					VIT_13s0064g01020
								VIT_18s0075g00620	VIT_01s0011g05170			VIT_05s0049g01200		VIT_12s0142g00700	VIT_01s0150g00140					VIT_03s0038g03660
								VIT_18s0075g00700	VIT_03s0088g01190			VIT_19s0014g04050		VIT_18s0001g03960	VIT_06s0004g04440					VIT_14s0030g01890
								VIT_18s0001g00680	VIT_02s0033g01110			VIT_10s0071g00450		VIT_16s0098g00220	VIT_16s0098g00740					VIT_03s0038g04110
								VIT_18s0001g00080	VIT_04s0044g00190			VIT_19s0014g04240		VIT_15s0046g03500	VIT_13s0073g00140					VIT_12s0057g00240
								VIT_18s0001g02410	VIT_17s0000g07640			VIT_19s0014g04630		VIT_17s0000g01640	VIT_06s0004g07910					VIT_07s0005g05720
								VIT_18s0001g01010	VIT_07s0185g00130			VIT_19s0014g04320		VIT_05s0020g04600	VIT_08s0058g01110					VIT_09s0002g04620
								VIT_00s0731g00010	VIT_09s0002g04750			VIT_19s0014g04310		VIT_19s0014g02740	VIT_02s0087g00460					VIT_11s0118g00770
								VIT_00s1212g00020	VIT_05s0020g03670			VIT_09s0002g00640		VIT_19s0014g02120	VIT_01s0137g00290					VIT_02s0236g00060
								VIT_18s0001g00730	VIT_04s0008g04490			VIT_07s0129g00580		VIT_07s0031g00820	VIT_07s0005g00250					VIT_12s0059g02730
								VIT_00s2280g00010	VIT_11s0052g01510			VIT_17s0000g06860		VIT_09s0002g06870	VIT_09s0002g06350					VIT_14s0030g02170
								VIT_18s0001g00310	VIT_11s0052g01550			VIT_06s0004g03000		VIT_18s0001g05440	VIT_07s0031g00850					VIT_12s0034g01970
								VIT_08s0007g01550	VIT_11s0052g01540			VIT_12s0028g02570		VIT_01s0011g06330	VIT_07s0151g01130					VIT_10s0003g01590
								VIT_18s0164g00100	VIT_11s0052g01560			VIT_19s0014g01720		VIT_00s0194g00260	VIT_08s0058g00640					VIT_18s0001g15120
								VIT_18s0001g00790	VIT_15s0046g01940			VIT_05s0077g00810		VIT_11s0103g00570	VIT_19s0014g01180					VIT_00s0516g00020
								VIT_18s0117g00590	VIT_18s0001g00700			VIT_01s0146g00350		VIT_04s0023g01320	VIT_03s0097g00700					VIT_03s0110g00080
								VIT_18s0122g00690	VIT_15s0107g00270			VIT_01s0011g00380		VIT_14s0068g00890	VIT_08s0040g00780					VIT_11s0016g04260
								VIT_09s0002g06420	VIT_03s0038g03030			VIT_01s0010g03940		VIT_13s0019g04060	VIT_08s0007g00700					VIT_14s0066g02610
								VIT_14s0036g00520	VIT_11s0016g04200			VIT_18s0001g08550		VIT_05s0094g01570	VIT_12s0142g00240					VIT_14s0068g01400
								VIT_11s0052g00190	VIT_19s0014g03680			VIT_03s0088g01140		VIT_00s0227g00140	VIT_10s0116g00680					VIT_07s0005g03990
								VIT_14s0066g01240	VIT_00s0449g00010			VIT_14s0068g01780		VIT_13s0019g04070	VIT_12s0059g02310					VIT_16s0050g00410
								VIT_18s0001g02560	VIT_00s0532g00060			VIT_06s0004g01390		VIT_08s0040g02180	VIT_13s0019g04910					VIT_14s0030g01700
								VIT_15s0046g02110	VIT_05s0020g04870			VIT_13s0156g00630		VIT_10s0003g00410	VIT_08s0007g04820					VIT_06s0061g00680
								VIT_07s0005g00660	VIT_19s0085g01030			VIT_13s0156g00550		VIT_07s0031g02240	VIT_17s0000g09810					VIT_04s0079g00260
								VIT_08s0007g04200	VIT_18s0122g00720			VIT_05s0020g03290		VIT_10s0405g00020	VIT_19s0015g00510					VIT_06s0004g02250
								VIT_15s0046g00230	VIT_00s0218g00100			VIT_05s0020g03240		VIT_11s0016g01200	VIT_07s0005g02440					VIT_05s0020g01830
								VIT_13s0019g03780	VIT_14s0066g01390			VIT_06s0004g01380		VIT_04s0008g01770	VIT_05s0020g01110					VIT_12s0028g03330
								VIT_01s0011g03540	VIT_16s0022g02120			VIT_12s0028g01640		VIT_19s0015g01370	VIT_02s0154g00600					VIT_05s0020g02500
								VIT_01s0011g03530	VIT_06s0004g04650			VIT_06s0004g01410		VIT_18s0001g08540	VIT_04s0023g02980					VIT_08s0105g00200
								VIT_14s0006g02950	VIT_08s0007g00330			VIT_08s0007g03860		VIT_06s0009g02060	VIT_11s0016g00300					VIT_18s0001g06600
								VIT_11s0016g01470	VIT_19s0014g02740			VIT_05s0020g03300		VIT_03s0038g03570	VIT_10s0116g00590					VIT_02s0025g00500
								VIT_05s0102g01200	VIT_14s0068g01710			VIT_06s0004g01400		VIT_12s0059g00770	VIT_11s0016g00290					VIT_04s0023g03720
								VIT_15s0024g00410	VIT_07s0095g00760			VIT_19s0014g04040		VIT_08s0007g03610	VIT_14s0060g01120					VIT_14s0219g00090
								VIT_08s0007g06560	VIT_11s0065g01010			VIT_19s0014g04150		VIT_14s0066g01100	VIT_04s0023g01460					VIT_18s0001g01410
								VIT_08s0007g06580	VIT_08s0007g08540			VIT_19s0014g03130		VIT_14s0006g02900	VIT_14s0128g00290					VIT_09s0002g03350
								VIT_03s0038g04170	VIT_16s0022g01820			VIT_07s0031g00790		VIT_04s0044g00220	VIT_19s0014g02920					VIT_01s0026g01300
								VIT_08s0007g06610	VIT_19s0090g01230			VIT_10s0116g01090		VIT_18s0001g01110	VIT_13s0067g01440					VIT_13s0064g00460
								VIT_08s0007g00830	VIT_01s0011g06330			VIT_16s0100g00830		VIT_07s0104g01600	VIT_07s0129g00600					VIT_18s0072g00270
								VIT_01s0011g06080	VIT_01s0010g03540			VIT_16s0100g00750		VIT_00s0203g00080	VIT_15s0021g01210					VIT_05s0020g01440
								VIT_00s1557g00020	VIT_01s0011g05790			VIT_16s0100g01120		VIT_05s0102g00450	VIT_00s0769g00010					VIT_19s0014g01360
								VIT_00s0265g00110	VIT_00s0194g00260			VIT_16s0100g01200		VIT_09s0002g03540	VIT_16s0100g00360					VIT_08s0007g05570
								VIT_12s0028g03580	VIT_07s0129g01080			VIT_16s0100g00770		VIT_11s0016g02410	VIT_06s0009g00810					VIT_05s0020g01270
								VIT_00s0265g00100	VIT_09s0002g05260			VIT_16s0100g01100		VIT_10s0071g00660	VIT_06s0004g01180					VIT_18s0001g12860
								VIT_14s0108g00280	VIT_16s0013g00490			VIT_16s0100g01010		VIT_06s0080g00790	VIT_04s0023g02570					VIT_18s0001g06320
								VIT_07s0005g04020	VIT_01s0026g02450			VIT_16s0100g00780		VIT_09s0002g03610	VIT_12s0059g02420					VIT_09s0002g04240
								VIT_05s0094g01070	VIT_14s0108g00760			VIT_16s0100g01040		VIT_07s0005g03340	VIT_16s0022g00470					VIT_19s0015g01230
								VIT_10s0092g00570	VIT_01s0150g00390			VIT_16s0100g00910		VIT_14s0006g00450	VIT_13s0019g03410					VIT_13s0019g03610
								VIT_05s0020g03030	VIT_10s0003g03080			VIT_16s0100g01020		VIT_07s0129g01050	VIT_15s0021g01340					VIT_01s0011g05420
								VIT_12s0134g00420	VIT_03s0038g00300			VIT_16s0100g00880		VIT_03s0180g00210	VIT_04s0008g01670					VIT_18s0166g00190
								VIT_19s0027g00010	VIT_05s0020g00480			VIT_16s0100g01030		VIT_03s0063g01060	VIT_13s0067g01000					VIT_11s0016g04380
								VIT_00s0324g00010	VIT_10s0003g04040			VIT_16s0100g01160		VIT_08s0007g06310	VIT_19s0014g00230					VIT_18s0001g06610
								VIT_14s0066g02680	VIT_01s0010g02430			VIT_16s0100g01190		VIT_02s0033g00300	VIT_07s0130g00210					VIT_04s0008g06670
								VIT_16s0050g01900	VIT_14s0066g01400			VIT_16s0100g01130		VIT_18s0001g07620	VIT_06s0004g02620
								VIT_19s0014g00700	VIT_05s0094g01570			VIT_16s0100g01170		VIT_13s0019g04010	VIT_08s0040g01710
								VIT_18s0072g00990	VIT_08s0040g02180			VIT_16s0100g00990		VIT_11s0016g02800	VIT_13s0019g04460
								VIT_10s0042g00700	VIT_10s0405g00020			VIT_16s0100g01140		VIT_16s0050g02420	VIT_13s0067g03260
								VIT_14s0066g02250	VIT_04s0043g00130			VIT_16s0100g00760		VIT_18s0001g10560	VIT_14s0068g01260
								VIT_17s0000g06710	VIT_08s0007g07380			VIT_16s0100g00950		VIT_04s0008g02720	VIT_04s0008g05300
								VIT_06s0004g08250	VIT_03s0097g00530			VIT_16s0100g01000		VIT_16s0050g00100	VIT_14s0066g01000
								VIT_08s0105g00380	VIT_12s0059g00770			VIT_06s0009g00850		VIT_14s0128g00020	VIT_17s0000g08560
								VIT_06s0009g00440	VIT_01s0127g00710			VIT_02s0025g02850		VIT_06s0004g06220	VIT_09s0002g06990
								VIT_16s0100g00290	VIT_05s0020g04430			VIT_15s0048g01200		VIT_04s0044g01500	VIT_17s0000g01190
								VIT_18s0001g11820	VIT_00s0179g00300			VIT_06s0080g00150		VIT_07s0031g02610	VIT_02s0012g00090
								VIT_10s0003g04210	VIT_13s0074g00200			VIT_14s0066g00450		VIT_06s0004g00020	VIT_19s0014g01390
								VIT_16s0098g00460	VIT_13s0074g00190			VIT_07s0104g00830		VIT_03s0038g03410	VIT_18s0001g07070
								VIT_07s0031g00570	VIT_11s0016g01130			VIT_05s0020g04210		VIT_08s0007g07670	VIT_19s0014g01290
								VIT_10s0003g04200	VIT_02s0154g00080			VIT_11s0016g04160		VIT_18s0001g11980	VIT_17s0000g02430
								VIT_01s0010g02190	VIT_07s0141g00540			VIT_13s0019g00010		VIT_18s0001g01820	VIT_01s0011g05200
								VIT_18s0001g02780	VIT_11s0016g04080			VIT_05s0020g04610		VIT_01s0026g02710	VIT_02s0025g03610
								VIT_17s0000g10060	VIT_03s0038g02730			VIT_08s0032g01150		VIT_13s0019g05240	VIT_06s0004g01550
								VIT_18s0001g02760	VIT_19s0085g00890			VIT_18s0001g00840		VIT_15s0048g02280	VIT_04s0008g03590
								VIT_09s0002g00540	VIT_10s0116g00500			VIT_18s0117g00340		VIT_15s0048g02300	VIT_00s2607g00010
								VIT_09s0002g00510	VIT_15s0048g02410			VIT_03s0017g02140		VIT_18s0001g01660	VIT_09s0002g05700
								VIT_08s0040g02800	VIT_17s0000g04130			VIT_07s0005g05680		VIT_06s0004g08360	VIT_04s0008g06630
								VIT_10s0071g01020	VIT_06s0004g06100			VIT_02s0025g04300		VIT_04s0044g01310	VIT_01s0010g01390
								VIT_14s0128g00780	VIT_11s0016g02410			VIT_02s0025g04330		VIT_04s0008g00180	VIT_07s0005g06300
								VIT_14s0128g00790	VIT_08s0007g01920			VIT_09s0002g04160		VIT_02s0025g01260	VIT_07s0005g00340
								VIT_02s0154g00350	VIT_14s0006g00450			VIT_07s0005g06420		VIT_19s0014g03160	VIT_10s0003g02680
								VIT_05s0020g03570	VIT_04s0023g03710			VIT_18s0001g13250		VIT_18s0001g07630	VIT_04s0008g06050
								VIT_01s0146g00240	VIT_17s0000g01890			VIT_08s0007g04310		VIT_02s0012g00150	VIT_00s1328g00020
								VIT_08s0007g08190	VIT_06s0004g04140			VIT_00s0335g00020		VIT_12s0035g01260	VIT_05s0062g01120
								VIT_02s0012g00310	VIT_07s0005g02480			VIT_00s0160g00090		VIT_06s0004g06760	VIT_05s0020g04190
								VIT_14s0060g01230	VIT_14s0060g00240			VIT_07s0005g02130		VIT_14s0030g01790	VIT_11s0016g04620
								VIT_08s0007g04400	VIT_17s0000g02650			VIT_00s2188g00010		VIT_13s0067g00260	VIT_02s0025g00740
								VIT_00s0370g00010	VIT_11s0016g05660			VIT_04s0008g06330		VIT_13s0074g00720	VIT_12s0034g01140
								VIT_06s0080g00810	VIT_06s0004g02110			VIT_11s0065g00350		VIT_02s0025g03000	VIT_05s0020g03130
								VIT_04s0023g01080	VIT_16s0022g01210			VIT_10s0116g00960		VIT_14s0066g01600	VIT_15s0048g00580
								VIT_18s0122g00230	VIT_00s1241g00010			VIT_07s0005g03230		VIT_17s0000g07790	VIT_01s0011g01410
								VIT_03s0038g03530	VIT_01s0026g01910			VIT_01s0137g00360		VIT_18s0001g14840	VIT_08s0040g00970
								VIT_06s0061g01210	VIT_08s0007g00410			VIT_01s0026g00880		VIT_02s0154g00260	VIT_19s0090g00050
								VIT_14s0171g00400	VIT_17s0000g06190			VIT_02s0025g03740		VIT_10s0003g02030	VIT_01s0127g00800
								VIT_17s0000g06270	VIT_03s0063g01060			VIT_14s0030g01240		VIT_17s0000g09470	VIT_01s0127g00400
								VIT_14s0108g00870	VIT_08s0040g00100			VIT_02s0025g02170		VIT_17s0000g10000	VIT_15s0046g02000
								VIT_07s0005g03360	VIT_02s0033g00300			VIT_01s0026g00280		VIT_02s0033g00800	VIT_01s0011g01300
								VIT_14s0066g02400	VIT_07s0197g00060			VIT_17s0000g08010		VIT_12s0035g00770	VIT_03s0063g02250
								VIT_01s0137g00600	VIT_13s0019g03370			VIT_10s0003g01680		VIT_10s0003g02690	VIT_19s0177g00040
								VIT_01s0011g03650	VIT_00s0174g00170			VIT_00s0304g00080		VIT_13s0067g00940	VIT_06s0061g01380
								VIT_04s0008g01310	VIT_02s0012g01940			VIT_00s0233g00030		VIT_15s0048g02320	VIT_07s0005g06090
								VIT_07s0031g00490	VIT_05s0029g00060			VIT_12s0028g01670		VIT_15s0048g02270	VIT_11s0016g00110
								VIT_04s0044g01290	VIT_11s0016g03750			VIT_12s0028g02000		VIT_17s0000g05040	VIT_13s0067g02570
								VIT_06s0004g03540	VIT_17s0000g05370			VIT_06s0004g05320		VIT_00s0404g00070	VIT_11s0065g00460
								VIT_17s0000g02570	VIT_06s0004g03400			VIT_13s0019g02180		VIT_00s0187g00050	VIT_01s0026g00040
								VIT_06s0004g03620	VIT_13s0067g02400			VIT_19s0014g02190		VIT_19s0090g00600	VIT_06s0061g01300
								VIT_02s0025g04110	VIT_08s0040g02400			VIT_12s0059g01400		VIT_12s0057g00060	VIT_02s0025g01350
								VIT_07s0031g00530	VIT_19s0093g00590			VIT_06s0009g00370		VIT_15s0046g01360	VIT_13s0156g00220
								VIT_00s0567g00010	VIT_19s0014g03640			VIT_08s0105g00200		VIT_12s0057g00950	VIT_02s0025g00150
								VIT_18s0001g11240	VIT_18s0001g13970			VIT_18s0166g00190		VIT_13s0019g04880	VIT_06s0004g03710
								VIT_17s0000g02970	VIT_02s0025g03760			VIT_15s0021g01390		VIT_04s0023g01700	VIT_03s0063g02520
								VIT_08s0056g01120	VIT_08s0007g07580			VIT_06s0061g01120		VIT_08s0007g07360	VIT_06s0004g06590
								VIT_01s0011g04450	VIT_01s0026g02550			VIT_06s0004g01670		VIT_01s0011g05980	VIT_09s0002g03250
								VIT_17s0000g02990	VIT_14s0030g00710			VIT_17s0000g07090		VIT_18s0001g10620	VIT_14s0171g00430
								VIT_00s0225g00050	VIT_18s0001g10250			VIT_06s0004g07240		VIT_02s0012g01380	VIT_07s0005g01430
								VIT_02s0025g04420	VIT_02s0025g03020			VIT_06s0004g07270		VIT_05s0077g00540	VIT_06s0004g05920
								VIT_06s0004g07140	VIT_12s0028g03050			VIT_06s0004g07250		VIT_13s0019g03530	VIT_03s0038g01960
								VIT_14s0066g01450	VIT_01s0011g02990			VIT_03s0017g02120		VIT_15s0024g01170	VIT_03s0038g01850
								VIT_08s0032g01020	VIT_15s0048g02660			VIT_12s0034g00060		VIT_12s0035g01110	VIT_06s0061g01010
								VIT_14s0036g01520	VIT_15s0048g02300			VIT_12s0055g00020		VIT_00s0187g00010	VIT_08s0040g02260
								VIT_04s0008g03820	VIT_06s0004g06950			VIT_12s0055g00200		VIT_00s0199g00310	VIT_13s0156g00090
								VIT_10s0003g04070	VIT_07s0129g00260			VIT_18s0041g00910		VIT_18s0001g10610	VIT_06s0004g00910
								VIT_01s0026g00900	VIT_18s0001g13070			VIT_18s0041g00740		VIT_06s0061g01500	VIT_18s0001g12760
								VIT_14s0060g00910	VIT_07s0031g02690			VIT_18s0041g00810		VIT_08s0056g01600	VIT_14s0030g01670
								VIT_00s0207g00100	VIT_00s0505g00030			VIT_05s0062g00700		VIT_18s0041g02200	VIT_11s0016g02530
								VIT_19s0014g02120	VIT_00s0246g00100			VIT_06s0004g07280		VIT_01s0011g02710	VIT_10s0071g00750
								VIT_02s0025g02510	VIT_09s0002g03620			VIT_12s0055g00160		VIT_08s0056g01610	VIT_06s0004g02890
								VIT_05s0029g01200	VIT_11s0016g03210			VIT_08s0007g04590		VIT_01s0137g00790	VIT_12s0059g01560
								VIT_00s0253g00090	VIT_09s0002g08480			VIT_08s0007g04570		VIT_12s0028g03900	VIT_02s0025g03240
								VIT_00s0253g00100	VIT_12s0059g00670			VIT_10s0003g04080		VIT_16s0050g01230	VIT_13s0019g04550
								VIT_00s0253g00080	VIT_19s0014g03160			VIT_00s0471g00020		VIT_13s0067g02630	VIT_18s0001g03680
								VIT_02s0025g02200	VIT_12s0059g00270			VIT_01s0011g02380		VIT_09s0002g05180	VIT_07s0005g04710
								VIT_00s0477g00070	VIT_08s0007g00770			VIT_18s0001g04130		VIT_13s0064g01100	VIT_03s0038g02400
								VIT_08s0056g01280	VIT_01s0026g00330			VIT_01s0011g02390		VIT_12s0035g01240	VIT_06s0004g07070
								VIT_04s0023g01320	VIT_01s0026g00320			VIT_18s0001g15230		VIT_00s1306g00020	VIT_04s0044g01560
								VIT_14s0128g00390	VIT_03s0038g02470			VIT_00s0265g00060		VIT_01s0011g04040	VIT_18s0001g01680
								VIT_14s0068g01250	VIT_14s0060g01190			VIT_15s0021g01260		VIT_01s0011g04330	VIT_11s0016g05720
								VIT_14s0068g00890	VIT_03s0038g03730			VIT_01s0026g00910		VIT_03s0017g01450	VIT_08s0056g00150
								VIT_05s0020g01380	VIT_01s0010g01000			VIT_13s0156g00150		VIT_16s0013g00390	VIT_17s0000g09290
								VIT_14s0083g01170	VIT_14s0083g00620			VIT_05s0020g03050		VIT_00s0226g00170	VIT_11s0016g02150
								VIT_13s0019g02440	VIT_10s0003g01490			VIT_01s0011g02420		VIT_05s0020g04400	VIT_19s0014g02670
								VIT_15s0021g01920	VIT_01s0127g00230			VIT_13s0019g03910		VIT_19s0090g00700	VIT_12s0028g00310
								VIT_04s0023g02420	VIT_07s0151g00310			VIT_09s0002g05610		VIT_03s0017g01710	VIT_14s0128g00430
								VIT_11s0016g01770	VIT_12s0057g01210			VIT_09s0002g05820		VIT_13s0064g00260	VIT_07s0104g01740
								VIT_09s0018g01820	VIT_19s0015g00690			VIT_12s0059g00490		VIT_11s0016g05780	VIT_14s0128g00510
								VIT_17s0000g01970	VIT_15s0048g00430			VIT_15s0048g01080		VIT_01s0026g02740	VIT_12s0059g01820
								VIT_07s0151g00500	VIT_06s0009g01920			VIT_19s0090g00360		VIT_19s0085g00320	VIT_11s0016g04500
								VIT_05s0020g03870	VIT_12s0059g02660			VIT_09s0002g02970		VIT_05s0020g04670	VIT_04s0008g04270
								VIT_13s0019g04070	VIT_14s0066g01350			VIT_14s0030g01890		VIT_02s0087g00380	VIT_11s0016g02550
								VIT_10s0003g00410	VIT_02s0025g01080			VIT_16s0100g00740		VIT_18s0001g03890	VIT_04s0008g00740
								VIT_07s0031g02240	VIT_04s0023g00910			VIT_02s0025g00540		VIT_19s0090g01040	VIT_02s0012g01100
								VIT_00s0415g00030	VIT_18s0001g04520			VIT_10s0003g01650		VIT_14s0081g00190	VIT_11s0037g00160
								VIT_01s0011g01110	VIT_08s0007g04810			VIT_03s0017g01940		VIT_07s0031g01550	VIT_00s0226g00070
								VIT_06s0009g02140	VIT_17s0000g05930			VIT_13s0158g00090		VIT_08s0007g07330	VIT_17s0000g01300
								VIT_13s0156g00170	VIT_03s0063g02470			VIT_12s0028g00580		VIT_07s0005g04350	VIT_07s0130g00030
								VIT_14s0006g02900	VIT_13s0019g04880			VIT_13s0019g01100		VIT_06s0004g00440	VIT_14s0060g00450
								VIT_04s0044g00220	VIT_03s0091g00420			VIT_01s0010g03880		VIT_08s0007g07310	VIT_13s0067g03200
								VIT_18s0001g01110	VIT_13s0019g05320			VIT_00s0317g00060		VIT_00s1466g00010	VIT_18s0041g00580
								VIT_04s0044g00270	VIT_14s0060g01730			VIT_11s0016g04230		VIT_18s0001g08760	VIT_13s0067g02340
								VIT_07s0104g01600	VIT_14s0006g01510			VIT_03s0038g03690		VIT_06s0009g03540	VIT_01s0026g01490
								VIT_06s0004g01810	VIT_04s0008g00700			VIT_14s0083g00370		VIT_04s0023g01690	VIT_02s0012g00570
								VIT_17s0000g00010	VIT_06s0080g00680			VIT_01s0011g03850		VIT_18s0001g10640	VIT_14s0068g00330
								VIT_19s0090g01870	VIT_13s0067g02420			VIT_12s0028g02440		VIT_04s0008g06140	VIT_06s0004g00040
								VIT_04s0008g00900	VIT_09s0018g02120			VIT_07s0205g00040		VIT_01s0011g02660	VIT_01s0011g06290
								VIT_06s0080g00790	VIT_05s0051g00700			VIT_14s0066g00600		VIT_08s0007g08010	VIT_14s0066g01120
								VIT_08s0056g01190	VIT_02s0012g01380			VIT_17s0000g05440		VIT_03s0017g01410	VIT_10s0116g00360
								VIT_05s0077g00500	VIT_12s0035g00740			VIT_06s0004g05650		VIT_01s0011g04840	VIT_09s0018g01940
								VIT_05s0049g01020	VIT_05s0077g00540			VIT_02s0025g01090		VIT_18s0001g14260	VIT_08s0007g05430
								VIT_07s0005g03340	VIT_08s0007g01350			VIT_18s0001g07770		VIT_19s0014g05340	VIT_08s0056g00190
								VIT_14s0066g02180	VIT_15s0021g00320			VIT_10s0071g00840		VIT_08s0032g00460	VIT_03s0088g00410
								VIT_08s0007g05030	VIT_10s0003g03400			VIT_12s0035g00920		VIT_07s0005g00060	VIT_00s0179g00350
								VIT_04s0008g01810	VIT_12s0035g00730			VIT_01s0026g02100		VIT_02s0087g00250	VIT_12s0134g00630
								VIT_17s0000g02730	VIT_18s0001g12700			VIT_04s0044g01450		VIT_18s0001g06400	VIT_12s0028g02650
								VIT_17s0000g02710	VIT_04s0023g01010			VIT_11s0016g02920		VIT_19s0014g02180	VIT_02s0025g02530
								VIT_19s0085g00050	VIT_00s0199g00310			VIT_08s0007g08520		VIT_11s0037g00020	VIT_07s0104g01120
								VIT_02s0025g02210	VIT_08s0056g01600			VIT_19s0014g02100		VIT_01s0010g00790	VIT_12s0028g02630
								VIT_11s0016g02780	VIT_16s0039g02430			VIT_10s0116g00430		VIT_07s0005g02720	VIT_09s0002g09150
								VIT_04s0008g01800	VIT_01s0011g02710			VIT_18s0001g03830		VIT_00s0802g00010	VIT_07s0104g00520
								VIT_09s0002g01400	VIT_08s0007g00950			VIT_10s0003g00980		VIT_07s0141g01050	VIT_08s0058g00900
								VIT_07s0129g01050	VIT_12s0028g03900			VIT_19s0090g00130		VIT_02s0025g01320	VIT_04s0008g02780
								VIT_07s0005g01950	VIT_09s0002g05180			VIT_01s0011g04780		VIT_00s0477g00010	VIT_04s0008g04150
								VIT_00s1352g00010	VIT_02s0025g00870			VIT_01s0150g00410		VIT_08s0058g01160	VIT_04s0008g03950
								VIT_03s0180g00210	VIT_03s0097g00560			VIT_07s0005g04340		VIT_16s0022g00650	VIT_04s0008g04050
								VIT_12s0028g00980	VIT_16s0039g02770			VIT_04s0008g06170		VIT_03s0091g01040	VIT_04s0008g04020
								VIT_05s0020g01360	VIT_02s0012g01870			VIT_17s0000g03790		VIT_18s0001g10630	VIT_05s0020g04170
								VIT_07s0104g01630	VIT_18s0001g07110			VIT_18s0001g10360		VIT_01s0011g02720	VIT_00s0262g00080
								VIT_01s0011g00700	VIT_10s0003g02530			VIT_14s0006g01930		VIT_01s0137g00680	VIT_03s0063g00210
								VIT_07s0031g01930	VIT_19s0014g03650			VIT_01s0011g03050		VIT_08s0007g08000	VIT_01s0150g00020
								VIT_02s0012g01320	VIT_09s0018g01830			VIT_18s0122g00300		VIT_04s0008g00700	VIT_06s0009g01640
								VIT_04s0008g02720	VIT_17s0000g03780			VIT_01s0011g04550		VIT_18s0001g08590	VIT_01s0026g00580
								VIT_09s0002g01910	VIT_07s0141g00670			VIT_08s0040g00440		VIT_03s0097g00560	VIT_08s0040g00060
								VIT_16s0050g00100	VIT_00s0207g00250			VIT_01s0011g02320		VIT_02s0012g01870	VIT_16s0022g01620
								VIT_04s0069g00870	VIT_16s0050g02310			VIT_18s0001g09060		VIT_18s0001g04640	VIT_02s0025g01040
								VIT_03s0017g01500	VIT_14s0068g00200			VIT_08s0058g00860		VIT_16s0098g01000	VIT_03s0180g00150
								VIT_19s0014g03290	VIT_07s0129g00560			VIT_07s0005g01140		VIT_11s0016g04050	VIT_06s0009g00580
								VIT_18s0001g02300	VIT_06s0080g00600			VIT_09s0002g04580		VIT_11s0016g02760	VIT_17s0000g05570
								VIT_07s0031g02610	VIT_05s0077g01920			VIT_05s0049g00800		VIT_10s0003g03810	VIT_16s0050g02430
								VIT_06s0004g00020	VIT_00s0125g00200			VIT_09s0002g04180		VIT_01s0011g05240	VIT_05s0102g00370
								VIT_00s0375g00040	VIT_18s0001g09080			VIT_08s0007g04230		VIT_08s0007g08040	VIT_16s0098g00160
								VIT_12s0028g00860	VIT_05s0049g00970			VIT_02s0241g00060		VIT_08s0040g01820	VIT_16s0098g00400
								VIT_02s0012g01040	VIT_14s0030g01730			VIT_05s0049g00140		VIT_11s0118g00210	VIT_01s0011g04060
								VIT_13s0019g05240	VIT_05s0102g00590			VIT_14s0060g01980		VIT_14s0068g01870	VIT_01s0011g05600
								VIT_08s0007g07640	VIT_14s0068g00150			VIT_18s0001g00130		VIT_09s0002g08650	VIT_05s0049g01860
								VIT_05s0077g02340	VIT_13s0064g00670			VIT_02s0241g00100		VIT_05s0049g00450	VIT_01s0010g02560
								VIT_06s0004g07410	VIT_01s0010g02540			VIT_19s0090g00510		VIT_18s0001g03170	VIT_17s0000g07440
								VIT_16s0039g02180	VIT_11s0016g03570			VIT_08s0040g01930		VIT_02s0025g03140	VIT_02s0033g01170
								VIT_08s0056g01150	VIT_10s0042g00060			VIT_14s0108g00930		VIT_14s0066g01640	VIT_04s0008g02570
								VIT_04s0008g00180	VIT_17s0000g02850			VIT_04s0008g01380		VIT_17s0000g00830	VIT_12s0028g03190
								VIT_11s0052g00880	VIT_16s0098g00270			VIT_02s0012g01590		VIT_01s0026g01590	VIT_18s0001g00610
								VIT_02s0012g00150	VIT_08s0007g07330			VIT_14s0006g03050		VIT_10s0042g01250	VIT_13s0019g02710
								VIT_02s0025g02960	VIT_18s0001g08920			VIT_06s0004g04490		VIT_01s0011g05950	VIT_19s0014g00180
								VIT_10s0003g02260	VIT_14s0006g02310			VIT_12s0035g02270		VIT_05s0062g00790	VIT_18s0001g03370
								VIT_16s0098g00830	VIT_14s0083g00290			VIT_18s0001g14410		VIT_13s0156g00310	VIT_07s0031g01990
								VIT_08s0040g00600	VIT_08s0056g01470			VIT_14s0060g01780		VIT_08s0007g08250	VIT_14s0068g02000
								VIT_00s0301g00090	VIT_14s0083g00260			VIT_17s0000g00570		VIT_18s0001g05960	VIT_00s0225g00140
								VIT_06s0004g06760	VIT_18s0001g08970			VIT_13s0084g00670		VIT_18s0001g11260	VIT_01s0150g00580
								VIT_07s0104g00180	VIT_13s0019g05350			VIT_01s0127g00700		VIT_14s0128g00360	VIT_06s0004g08260
								VIT_05s0020g02730	VIT_05s0102g00490			VIT_15s0046g02330		VIT_05s0029g00420	VIT_08s0007g03340
								VIT_13s0067g00260	VIT_12s0059g01050			VIT_11s0103g00490		VIT_01s0011g04050	VIT_06s0080g00400
								VIT_14s0006g00650	VIT_18s0089g01180			VIT_12s0059g01640		VIT_06s0004g07930	VIT_12s0028g01800
								VIT_13s0074g00720	VIT_15s0024g00800			VIT_02s0025g03750		VIT_19s0015g00550	VIT_13s0019g04300
								VIT_15s0048g02370	VIT_05s0077g01910			VIT_18s0001g15120		VIT_17s0000g02050	VIT_08s0040g01870
								VIT_18s0001g10180	VIT_05s0102g00660			VIT_03s0063g01940		VIT_12s0057g01100	VIT_06s0004g02840
								VIT_18s0001g10230	VIT_17s0000g01060			VIT_18s0001g08810		VIT_05s0077g00620	VIT_13s0047g01160
								VIT_06s0080g00880	VIT_07s0005g06160			VIT_05s0102g01130		VIT_05s0051g00660	VIT_05s0029g00020
								VIT_07s0031g00460	VIT_17s0000g02560			VIT_06s0004g02250		VIT_11s0118g00490	VIT_11s0118g00670
								VIT_18s0001g03910	VIT_14s0068g00190			VIT_02s0025g02490		VIT_04s0008g06310	VIT_05s0049g01310
								VIT_01s0026g01570	VIT_12s0028g03120			VIT_04s0008g05970		VIT_03s0097g00600	VIT_15s0021g02480
								VIT_01s0127g00070	VIT_01s0011g04840			VIT_05s0020g02500		VIT_01s0011g04140	VIT_16s0013g02020
								VIT_17s0000g09470	VIT_05s0020g01210			VIT_12s0035g01220		VIT_17s0000g09190	VIT_00s0551g00020
								VIT_14s0219g00160	VIT_04s0044g00290			VIT_12s0028g02110		VIT_06s0009g00240	VIT_01s0010g03380
								VIT_02s0033g00800	VIT_09s0018g01690			VIT_12s0059g01800		VIT_18s0001g07950	VIT_17s0000g01520
								VIT_02s0109g00430	VIT_12s0028g03790			VIT_01s0010g00060		VIT_13s0067g01120	VIT_05s0077g02070
								VIT_02s0033g00770	VIT_05s0102g00620			VIT_04s0044g01430		VIT_11s0016g00120	VIT_14s0060g01930
								VIT_02s0033g00870	VIT_08s0007g05720			VIT_15s0046g03360		VIT_18s0001g12490	VIT_10s0003g03150
								VIT_02s0033g00670	VIT_08s0040g01720			VIT_14s0219g00080		VIT_14s0068g00690	VIT_12s0134g00060
								VIT_02s0033g00660	VIT_16s0100g00220			VIT_03s0063g01380		VIT_01s0011g04500	VIT_08s0007g06890
								VIT_03s0063g00370	VIT_08s0032g00460			VIT_05s0020g01830		VIT_18s0001g01430	VIT_08s0007g07010
								VIT_11s0016g01900	VIT_07s0005g00060			VIT_13s0073g00250		VIT_19s0014g05080	VIT_01s0150g00520
								VIT_01s0011g00940	VIT_19s0085g01010			VIT_01s0011g00530		VIT_18s0122g00680	VIT_07s0005g00560
								VIT_01s0026g00600	VIT_09s0018g01410			VIT_02s0154g00090		VIT_18s0001g03790	VIT_05s0077g02290
								VIT_14s0066g01370	VIT_14s0066g01330			VIT_00s0207g00280		VIT_09s0002g06970	VIT_05s0049g01790
								VIT_17s0000g00650	VIT_05s0102g00600			VIT_17s0000g04380		VIT_12s0034g01180	VIT_07s0005g04150
								VIT_13s0139g00020	VIT_08s0007g07990			VIT_17s0000g04360		VIT_15s0048g02190	VIT_16s0100g00650
								VIT_13s0019g02190	VIT_05s0020g04550			VIT_13s0019g02300		VIT_04s0044g00530	VIT_08s0007g03850
								VIT_16s0013g01590	VIT_18s0001g08080			VIT_19s0015g01750		VIT_06s0004g01220	VIT_07s0197g00010
								VIT_19s0090g00600	VIT_18s0089g00970			VIT_18s0001g15130		VIT_13s0019g04170	VIT_00s1247g00020
								VIT_01s0011g01350	VIT_17s0000g09800			VIT_12s0057g00110		VIT_18s0041g00430	VIT_07s0129g00160
								VIT_00s1711g00020	VIT_05s0077g01460			VIT_04s0008g05750		VIT_05s0077g01580	VIT_01s0011g01820
								VIT_12s0057g00950	VIT_10s0003g03380			VIT_04s0008g05760		VIT_18s0001g15650	VIT_00s0225g00020
								VIT_16s0098g01360	VIT_04s0008g04500			VIT_00s2547g00010		VIT_18s0001g15640	VIT_17s0000g09110
								VIT_04s0008g03710	VIT_01s0011g00060			VIT_15s0046g02190		VIT_18s0001g15660	VIT_14s0066g00560
								VIT_05s0020g00960	VIT_12s0035g00050			VIT_06s0004g07500		VIT_02s0087g00400	VIT_04s0008g00790
								VIT_11s0037g00470	VIT_10s0003g03430			VIT_08s0058g00690		VIT_14s0060g00230	VIT_09s0002g02560
								VIT_11s0118g00430	VIT_08s0007g08030			VIT_09s0018g00240		VIT_11s0016g00330	VIT_05s0077g01220
								VIT_01s0011g02580	VIT_12s0028g01130			VIT_07s0005g02570		VIT_01s0011g05380	VIT_18s0072g00340
								VIT_11s0016g04800	VIT_00s0477g00010			VIT_15s0046g01140		VIT_16s0098g01900	VIT_13s0064g00850
								VIT_05s0020g04990	VIT_19s0015g00490			VIT_19s0090g00840		VIT_09s0002g00330	VIT_13s0064g01240
								VIT_03s0097g00240	VIT_13s0019g02320			VIT_10s0116g01200		VIT_09s0002g00320	VIT_10s0003g02650
								VIT_00s0187g00020	VIT_00s0181g00030			VIT_12s0028g01700		VIT_01s0011g01970	VIT_00s0317g00130
								VIT_01s0011g04940	VIT_09s0002g00630			VIT_12s0028g01690		VIT_01s0011g00660	VIT_06s0004g04020
								VIT_14s0006g02340	VIT_14s0068g00040			VIT_10s0003g01600		VIT_04s0008g03850	VIT_13s0019g03260
								VIT_01s0011g02570	VIT_08s0007g00270			VIT_17s0000g05810		VIT_15s0046g01060	VIT_01s0011g02080
								VIT_02s0033g01390	VIT_01s0026g01900			VIT_14s0108g00120		VIT_08s0007g05520	VIT_13s0064g00880
								VIT_18s0072g00090	VIT_02s0033g00540			VIT_01s0010g03930		VIT_08s0040g03240	VIT_09s0002g04440
								VIT_00s0233g00010	VIT_01s0011g02720			VIT_17s0000g01280		VIT_14s0108g00970	VIT_02s0012g00100
								VIT_02s0025g04870	VIT_15s0024g00740			VIT_14s0068g01770		VIT_13s0073g00130	VIT_15s0021g01000
								VIT_12s0035g01240	VIT_10s0003g03410			VIT_12s0055g00340		VIT_12s0134g00210	VIT_04s0023g00930
								VIT_14s0128g00010	VIT_05s0062g01260			VIT_06s0004g02030		VIT_05s0029g00240	VIT_08s0040g03200
								VIT_01s0011g04040	VIT_05s0020g04490			VIT_11s0052g01280		VIT_08s0007g04280	VIT_06s0004g00360
								VIT_03s0063g01760	VIT_08s0007g08070			VIT_05s0062g00240		VIT_14s0060g00270	VIT_08s0217g00120
								VIT_06s0004g07510	VIT_19s0014g04960			VIT_05s0062g00610		VIT_18s0001g10530	VIT_13s0064g01390
								VIT_03s0088g00270	VIT_01s0011g00830			VIT_11s0052g01330		VIT_08s0007g08590	VIT_14s0068g01640
								VIT_00s0301g00080	VIT_17s0000g01160			VIT_11s0052g01200		VIT_16s0013g02120	VIT_17s0000g00980
								VIT_07s0031g01260	VIT_04s0008g06210			VIT_10s0003g02440		VIT_18s0122g01200	VIT_14s0083g00970
								VIT_00s0187g00080	VIT_18s0076g00320			VIT_11s0052g01180		VIT_11s0052g00600	VIT_19s0014g04760
								VIT_14s0030g01230	VIT_08s0040g00800			VIT_11s0052g01260		VIT_18s0001g05930	VIT_04s0023g03210
								VIT_00s0301g00070	VIT_18s0001g03180			VIT_02s0012g02220		VIT_01s0010g00630	VIT_16s0098g00730
								VIT_08s0007g05270	VIT_18s0001g03170			VIT_11s0052g01190		VIT_14s0060g01460	VIT_09s0002g01620
								VIT_13s0139g00140	VIT_02s0025g03140			VIT_11s0052g01320		VIT_18s0001g13220	VIT_13s0067g00270
								VIT_13s0047g01110	VIT_01s0026g00550			VIT_11s0052g01270		VIT_15s0046g01830	VIT_13s0019g03970
								VIT_18s0001g01530	VIT_14s0066g01640			VIT_11s0052g01300		VIT_12s0034g01820	VIT_15s0048g02610
								VIT_05s0049g00660	VIT_14s0066g01650			VIT_11s0052g01310		VIT_14s0068g02070	VIT_16s0098g01010
								VIT_19s0085g00610	VIT_02s0025g03130			VIT_11s0052g01220		VIT_18s0001g11140	VIT_08s0007g03620
								VIT_14s0081g00210	VIT_18s0072g00660			VIT_05s0062g00480		VIT_07s0104g01470	VIT_06s0061g01600
								VIT_01s0011g01810	VIT_18s0001g15330			VIT_11s0052g01340		VIT_18s0041g00730	VIT_11s0103g00220
								VIT_00s0801g00010	VIT_04s0008g01480			VIT_12s0134g00160		VIT_14s0066g01070	VIT_16s0050g01160
								VIT_07s0005g01690	VIT_08s0058g01350			VIT_11s0052g01710		VIT_19s0014g00170	VIT_02s0025g00310
								VIT_08s0007g01110	VIT_13s0067g02910			VIT_17s0000g06380		VIT_01s0150g00250	VIT_11s0037g00080
								VIT_00s0301g00060	VIT_05s0020g00750			VIT_14s0066g01880		VIT_10s0003g05150	VIT_09s0070g00050
								VIT_00s2001g00010	VIT_13s0156g00310			VIT_13s0047g00010		VIT_07s0031g01150	VIT_15s0048g00670
								VIT_11s0016g04050	VIT_12s0142g00120			VIT_13s0019g00480		VIT_01s0150g00200	VIT_06s0080g00740
								VIT_00s0407g00050	VIT_09s0002g00840			VIT_06s0061g00780		VIT_14s0066g01410	VIT_05s0020g04790
								VIT_17s0000g00640	VIT_14s0066g00490			VIT_06s0004g04180		VIT_14s0006g02750	VIT_13s0019g00530
								VIT_04s0023g03090	VIT_08s0032g01190			VIT_01s0026g01030		VIT_18s0072g00950	VIT_03s0063g00130
								VIT_03s0017g01460	VIT_10s0003g04650			VIT_05s0077g01970		VIT_03s0038g01940	VIT_05s0020g02990
								VIT_18s0001g08760	VIT_08s0007g08250			VIT_05s0029g00650		VIT_12s0055g01030	VIT_08s0007g02620
								VIT_14s0036g00920	VIT_00s0259g00180			VIT_03s0017g00670		VIT_07s0130g00220	VIT_13s0073g00120
								VIT_05s0049g00720	VIT_12s0057g01010			VIT_18s0001g10260		VIT_18s0001g06840	VIT_01s0011g00680
								VIT_10s0003g05650	VIT_17s0000g01130			VIT_06s0004g06530		VIT_11s0016g00560	VIT_17s0000g06980
								VIT_09s0002g03700	VIT_05s0020g02790			VIT_13s0019g04440		VIT_19s0085g00500	VIT_08s0007g08370
								VIT_01s0011g02660	VIT_00s0216g00060			VIT_12s0028g02530		VIT_15s0048g01890	VIT_16s0022g01460
								VIT_00s0426g00010	VIT_10s0116g00570			VIT_05s0020g04730		VIT_11s0016g03850	VIT_05s0020g01480
								VIT_03s0017g01410	VIT_13s0147g00100			VIT_02s0025g01430		VIT_17s0000g08410	VIT_06s0004g03410
								VIT_06s0004g02650	VIT_00s0813g00010			VIT_04s0008g00610		VIT_14s0036g01130	VIT_14s0030g01620
								VIT_00s0207g00030	VIT_17s0000g07850			VIT_01s0026g00850		VIT_02s0154g00610	VIT_03s0038g04560
								VIT_01s0137g00260	VIT_14s0068g00870			VIT_03s0017g02170		VIT_01s0011g05470	VIT_06s0004g07940
								VIT_13s0047g01170	VIT_01s0150g00320			VIT_06s0004g06940		VIT_04s0023g00780	VIT_13s0067g02700
								VIT_11s0052g01040	VIT_08s0058g00170					VIT_14s0060g01560	VIT_01s0150g00310
								VIT_06s0009g01410	VIT_01s0011g05670					VIT_11s0103g00120	VIT_09s0002g00970
								VIT_08s0007g05830	VIT_07s0255g00020					VIT_13s0019g03270	VIT_03s0091g00640
								VIT_05s0049g00760	VIT_00s0253g00060					VIT_08s0007g01690	VIT_04s0008g01750
								VIT_07s0104g01130	VIT_17s0000g04850					VIT_18s0001g06140	VIT_09s0002g02640
								VIT_06s0009g01010	VIT_03s0097g00600					VIT_03s0017g01210	VIT_11s0016g02690
								VIT_18s0001g06400	VIT_00s0291g00050					VIT_18s0001g06020	VIT_05s0020g03900
								VIT_19s0014g03750	VIT_01s0011g04140					VIT_18s0001g06180	VIT_14s0030g01810
								VIT_15s0048g02640	VIT_18s0001g08010					VIT_06s0061g00380	VIT_08s0058g00390
								VIT_09s0054g00570	VIT_04s0008g02930					VIT_04s0023g02150	VIT_06s0004g07150
								VIT_04s0079g00540	VIT_18s0001g12490					VIT_08s0007g01510	VIT_13s0067g01820
								VIT_05s0020g01900	VIT_08s0007g00780					VIT_01s0011g04180	VIT_08s0007g07220
								VIT_10s0116g01840	VIT_13s0019g05260					VIT_15s0046g00440	VIT_04s0043g00440
								VIT_01s0011g05240	VIT_15s0046g00140					VIT_08s0007g04980	VIT_03s0017g01350
								VIT_02s0025g01320	VIT_06s0004g04700					VIT_00s1995g00010	VIT_00s0337g00060
								VIT_06s0009g03390	VIT_04s0023g01490					VIT_11s0016g02850	VIT_17s0000g05970
								VIT_17s0000g03160	VIT_04s0008g05190					VIT_01s0011g05210	VIT_14s0108g00460
								VIT_05s0102g00190	VIT_02s0087g00460					VIT_16s0022g02320	VIT_09s0002g00610
								VIT_18s0001g08900	VIT_01s0026g02680					VIT_00s0265g00010	VIT_05s0020g01410
								VIT_08s0058g01160	VIT_02s0012g02050					VIT_17s0000g08200	VIT_10s0003g01280
								VIT_01s0146g00320	VIT_04s0008g02640					VIT_11s0016g00440	VIT_14s0036g00540
								VIT_02s0025g00770	VIT_12s0057g00560					VIT_09s0002g00590	VIT_10s0003g05690
								VIT_19s0014g03310	VIT_07s0005g01840					VIT_08s0105g00300	VIT_12s0142g00620
								VIT_08s0007g08220	VIT_07s0151g01130					VIT_03s0038g02090	VIT_01s0011g02800
								VIT_18s0001g12450	VIT_12s0034g01170					VIT_13s0047g01210	VIT_15s0021g00890
								VIT_19s0085g00400	VIT_00s0567g00060					VIT_00s0189g00030	VIT_18s0001g01940
								VIT_09s0054g00560	VIT_10s0092g00150					VIT_01s0011g02480	VIT_00s0187g00160
								VIT_07s0005g02930	VIT_08s0058g00640					VIT_02s0109g00080	VIT_01s0011g03860
								VIT_05s0094g00160	VIT_11s0052g01650					VIT_09s0002g05200	VIT_12s0134g00140
								VIT_12s0059g01720	VIT_11s0052g01620					VIT_17s0000g04650	VIT_08s0007g07820
								VIT_18s0001g04640	VIT_13s0019g04900					VIT_08s0007g01560	VIT_15s0048g02630
								VIT_09s0002g06400	VIT_13s0019g04910					VIT_16s0050g00410	VIT_08s0007g06300
								VIT_02s0087g00650	VIT_01s0137g00240					VIT_19s0027g00200	VIT_13s0158g00370
								VIT_03s0063g00840	VIT_08s0007g04820					VIT_18s0122g00430	VIT_07s0031g01290
								VIT_11s0118g00210	VIT_17s0000g09810					VIT_06s0009g01550	VIT_07s0005g03980
								VIT_14s0083g00870	VIT_02s0154g00600					VIT_00s0207g00210	VIT_02s0025g02740
								VIT_09s0002g08430	VIT_11s0016g00330					VIT_13s0019g00260	VIT_06s0004g08230
								VIT_03s0063g01210	VIT_05s0062g01160					VIT_03s0038g04210	VIT_16s0050g00880
								VIT_03s0063g01160	VIT_10s0116g00590					VIT_07s0031g02390	VIT_01s0010g03600
								VIT_19s0014g00280	VIT_17s0000g00040					VIT_17s0000g05060	VIT_10s0003g05420
								VIT_04s0043g00250	VIT_16s0050g01450					VIT_05s0077g01470	VIT_05s0020g02370
								VIT_03s0063g01970	VIT_13s0084g00820					VIT_02s0025g01130	VIT_11s0037g00950
								VIT_03s0063g01960	VIT_12s0034g00970					VIT_12s0028g01110	VIT_07s0005g02230
								VIT_02s0012g00390	VIT_03s0088g00320					VIT_17s0000g06040	VIT_05s0094g00960
								VIT_13s0064g00360	VIT_13s0084g00620					VIT_09s0002g00100	VIT_13s0019g01060
								VIT_07s0031g03060	VIT_16s0100g00360					VIT_03s0038g04180	VIT_08s0056g00050
								VIT_10s0003g00150	VIT_05s0020g04130					VIT_18s0122g00160	VIT_02s0154g00400
								VIT_01s0011g05950	VIT_06s0009g00810					VIT_14s0006g02510	VIT_04s0023g01380
								VIT_05s0062g00790	VIT_18s0001g07230					VIT_12s0059g01260	VIT_05s0020g03350
								VIT_12s0059g01970	VIT_06s0009g03650					VIT_16s0098g00940	VIT_04s0008g02590
								VIT_18s0001g12630	VIT_03s0038g01940					VIT_11s0016g05530	VIT_09s0002g00420
								VIT_07s0005g05860	VIT_07s0191g00050					VIT_18s0122g00320	VIT_18s0001g05020
								VIT_19s0014g02990	VIT_00s1677g00010					VIT_19s0014g00450	VIT_02s0025g04660
								VIT_11s0016g01480	VIT_00s0510g00030					VIT_12s0028g01360	VIT_14s0006g01420
								VIT_09s0002g01590	VIT_12s0059g02420					VIT_08s0007g06680	VIT_09s0002g09090
								VIT_05s0049g01940	VIT_08s0040g02200					VIT_12s0028g01370	VIT_13s0158g00070
								VIT_17s0000g05240	VIT_11s0016g03630					VIT_18s0001g03880	VIT_03s0063g00860
								VIT_06s0009g02100	VIT_00s0125g00170					VIT_14s0083g00980	VIT_11s0052g00750
								VIT_06s0004g02090	VIT_01s0011g03170					VIT_05s0077g00650	VIT_18s0001g15550
								VIT_13s0073g00710	VIT_15s0021g01340					VIT_01s0011g04320	VIT_08s0040g01130
								VIT_03s0038g00110	VIT_12s0059g01740					VIT_18s0001g08290	VIT_17s0000g00370
								VIT_01s0011g02180	VIT_04s0008g01670					VIT_13s0139g00110	VIT_08s0040g01140
								VIT_02s0025g01500	VIT_09s0002g01600					VIT_07s0005g00890	VIT_01s0011g02030
								VIT_17s0000g10280	VIT_08s0105g00360					VIT_00s0480g00060	VIT_05s0077g00560
								VIT_17s0000g01400	VIT_18s0089g01050					VIT_14s0036g01020	VIT_14s0068g00260
								VIT_17s0000g01410	VIT_08s0040g02510					VIT_02s0025g03300	VIT_03s0091g01290
								VIT_04s0023g01990	VIT_19s0015g01550					VIT_06s0004g06890	VIT_03s0088g00260
								VIT_19s0014g02810	VIT_19s0015g01620					VIT_18s0122g00410	VIT_11s0052g00770
								VIT_19s0015g00550	VIT_00s0194g00010					VIT_04s0023g01110	VIT_11s0052g00790
								VIT_10s0003g00880	VIT_16s0022g01430					VIT_07s0005g02610	VIT_03s0038g03600
								VIT_12s0057g01100	VIT_01s0011g01920					VIT_03s0088g01180	VIT_03s0038g03810
								VIT_12s0057g01110	VIT_01s0011g04180					VIT_14s0083g00520	VIT_11s0016g00240
								VIT_01s0127g00500	VIT_14s0006g02480					VIT_16s0050g02450	VIT_01s0137g00580
								VIT_04s0008g06310	VIT_01s0011g04160					VIT_13s0084g00160	VIT_17s0000g09500
								VIT_17s0000g04210	VIT_06s0009g03350					VIT_00s0264g00040	VIT_04s0008g00530
								VIT_00s0245g00050	VIT_17s0000g01190					VIT_06s0061g00970	VIT_12s0028g03360
								VIT_04s0023g03570	VIT_01s0010g00600					VIT_14s0006g02570	VIT_06s0004g01780
								VIT_02s0025g02390	VIT_01s0011g02740					VIT_03s0017g02260	VIT_07s0005g01590
								VIT_10s0116g00550	VIT_01s0011g05220					VIT_19s0015g01270	VIT_16s0098g01850
								VIT_13s0019g04410	VIT_16s0022g02320					VIT_05s0165g00220	VIT_18s0001g11380
								VIT_13s0067g01120	VIT_12s0034g01860					VIT_04s0008g02900	VIT_14s0030g00650
								VIT_18s0001g00290	VIT_00s0265g00010					VIT_18s0001g02510	VIT_14s0030g00660
								VIT_01s0026g02290	VIT_13s0067g00900					VIT_08s0007g05550	VIT_08s0040g03400
								VIT_18s0001g12780	VIT_03s0038g02090					VIT_00s0772g00010	VIT_00s0283g00070
								VIT_18s0001g11230	VIT_09s0002g06760					VIT_02s0025g01100	VIT_06s0080g00250
								VIT_13s0074g00470	VIT_00s0264g00100					VIT_09s0002g03440	VIT_03s0038g02480
								VIT_08s0040g01590	VIT_04s0008g05120					VIT_03s0038g03040	VIT_07s0031g01580
								VIT_13s0067g01510	VIT_02s0025g03590					VIT_15s0046g02030	VIT_15s0046g01810
								VIT_00s0250g00090	VIT_14s0060g02200					VIT_19s0014g01530	VIT_13s0073g00580
								VIT_06s0004g02120	VIT_17s0000g10050					VIT_18s0001g00180	VIT_18s0122g01350
								VIT_18s0001g03790	VIT_18s0072g01170					VIT_15s0046g02480	VIT_01s0150g00610
								VIT_07s0031g00210	VIT_05s0020g03180					VIT_00s0220g00120	VIT_14s0030g00830
								VIT_03s0063g00070	VIT_00s0125g00280					VIT_18s0001g03810	VIT_05s0020g00930
								VIT_07s0005g05780	VIT_07s0005g04920					VIT_18s0122g01260	VIT_18s0164g00070
								VIT_01s0127g00490	VIT_04s0044g01410					VIT_04s0044g00050	VIT_01s0150g00060
								VIT_18s0001g13270	VIT_19s0015g01760					VIT_01s0026g01880	VIT_01s0011g00370
								VIT_17s0000g04320	VIT_09s0002g04320					VIT_03s0038g03800	VIT_05s0020g03200
								VIT_08s0007g05800	VIT_06s0080g00920					VIT_06s0004g03670	VIT_04s0008g01740
								VIT_18s0001g10870	VIT_10s0003g04350					VIT_07s0031g00480	VIT_18s0122g00470
								VIT_18s0001g10850	VIT_04s0023g00410					VIT_18s0001g10310	VIT_09s0054g01600
								VIT_10s0116g00830	VIT_19s0027g00200					VIT_16s0050g01020	VIT_11s0016g05330
								VIT_18s0001g10910	VIT_18s0001g02740					VIT_06s0004g04580	VIT_04s0008g05420
								VIT_18s0001g10830	VIT_01s0137g00210					VIT_10s0116g00440	VIT_00s0525g00020
								VIT_05s0077g01520	VIT_12s0028g01080					VIT_10s0003g05720	VIT_18s0001g08550
								VIT_05s0077g01570	VIT_00s0904g00010					VIT_18s0001g10470	VIT_01s0010g03710
								VIT_05s0077g01690	VIT_18s0001g11710					VIT_07s0129g00960	VIT_12s0028g03350
								VIT_05s0077g01560	VIT_00s0207g00210					VIT_17s0000g06620	VIT_05s0020g01310
								VIT_05s0077g01550	VIT_12s0059g01810					VIT_13s0067g00490	VIT_05s0020g02910
								VIT_11s0103g00650	VIT_07s0141g00570					VIT_09s0002g08640	VIT_00s0499g00030
								VIT_18s0001g15660	VIT_14s0081g00060					VIT_13s0067g02510	VIT_04s0023g01630
								VIT_08s0040g02740	VIT_07s0104g01440					VIT_13s0019g04920	VIT_17s0000g04950
								VIT_06s0009g02630	VIT_04s0008g06630					VIT_08s0007g04850	VIT_05s0102g01170
								VIT_06s0009g02560	VIT_01s0137g00820					VIT_19s0014g02340	VIT_12s0035g01960
								VIT_06s0009g02590	VIT_00s0194g00080					VIT_09s0070g00490	VIT_06s0009g00850
								VIT_16s0022g00700	VIT_07s0005g06300					VIT_12s0028g03310	VIT_04s0210g00120
								VIT_11s0016g00300	VIT_07s0129g00380					VIT_16s0050g02570	VIT_10s0116g00100
								VIT_07s0005g00720	VIT_19s0177g00160					VIT_08s0040g02970	VIT_16s0022g00060
								VIT_01s0011g01970	VIT_02s0025g01110					VIT_18s0001g05690	VIT_07s0005g04410
								VIT_05s0029g00490	VIT_12s0028g01110					VIT_03s0091g00470	VIT_09s0002g01040
								VIT_14s0066g00860	VIT_14s0060g00260					VIT_06s0004g06840	VIT_15s0048g01130
								VIT_12s0028g01620	VIT_08s0056g00720					VIT_18s0122g01010	VIT_10s0003g02170
								VIT_14s0036g00680	VIT_04s0079g00680					VIT_03s0038g02650	VIT_16s0022g02200
								VIT_18s0001g01880	VIT_11s0016g04620					VIT_13s0019g02200	VIT_13s0019g02530
								VIT_08s0040g01750	VIT_10s0003g04320					VIT_00s0250g00020	VIT_13s0019g02550
								VIT_15s0046g00030	VIT_18s0122g00160					VIT_10s0042g01140	VIT_13s0019g02540
								VIT_14s0060g01120	VIT_05s0020g03130					VIT_18s0041g00490	VIT_09s0002g01030
								VIT_05s0094g01640	VIT_19s0014g02460					VIT_06s0004g06080	VIT_03s0038g02230
								VIT_14s0108g00970	VIT_18s0001g06580					VIT_08s0040g00830	VIT_14s0219g00150
								VIT_12s0059g01940	VIT_14s0108g01320					VIT_15s0021g00330	VIT_14s0030g00250
								VIT_00s0274g00040	VIT_18s0001g00760					VIT_18s0041g00670	VIT_05s0020g03970
								VIT_04s0023g01460	VIT_16s0039g01560					VIT_08s0007g01310	VIT_07s0151g00410
								VIT_00s0271g00080	VIT_02s0012g01400					VIT_08s0007g02020	VIT_07s0151g00340
								VIT_12s0057g00970	VIT_06s0009g03240					VIT_08s0007g02800	VIT_01s0011g04980
								VIT_06s0004g07690	VIT_06s0004g06350					VIT_01s0011g03350	VIT_05s0049g00150
								VIT_18s0001g07920	VIT_13s0067g00450					VIT_04s0008g01730	VIT_03s0091g00430
								VIT_18s0001g00570	VIT_08s0040g00970					VIT_06s0004g03920	VIT_02s0087g00810
								VIT_18s0041g01110	VIT_06s0009g02040					VIT_10s0003g01730	VIT_15s0024g00650
								VIT_19s0015g00900	VIT_14s0006g01610					VIT_13s0019g05160	VIT_18s0122g00670
								VIT_18s0001g14940	VIT_19s0014g00460					VIT_08s0007g07440	VIT_13s0064g01440
								VIT_18s0001g15530	VIT_18s0001g03880					VIT_12s0142g00050	VIT_03s0038g04720
								VIT_08s0056g00660	VIT_18s0001g05040					VIT_18s0001g06950	VIT_14s0128g00440
								VIT_18s0001g04270	VIT_14s0068g01620					VIT_15s0021g00650	VIT_12s0028g03330
								VIT_04s0023g02490	VIT_03s0017g01220					VIT_05s0051g00640	VIT_00s0670g00010
								VIT_05s0020g04580	VIT_01s0127g00850					VIT_18s0001g13330	VIT_12s0028g02520
								VIT_17s0000g02580	VIT_07s0005g02590					VIT_06s0009g00680	VIT_19s0014g01680
								VIT_04s0008g05070	VIT_01s0127g00400					VIT_08s0007g07350	VIT_15s0024g00620
								VIT_08s0007g08320	VIT_05s0020g00420					VIT_14s0060g01280	VIT_13s0019g04050
								VIT_11s0016g04660	VIT_15s0046g02000					VIT_16s0050g02660	VIT_19s0090g00630
								VIT_19s0014g02920	VIT_01s0011g01300					VIT_02s0012g01170	VIT_18s0001g00800
								VIT_18s0001g14960	VIT_14s0036g01020					VIT_05s0020g02310	VIT_07s0151g00680
								VIT_14s0068g01240	VIT_06s0061g01380					VIT_15s0048g02460	VIT_10s0116g00080
								VIT_08s0007g04280	VIT_11s0016g05810					VIT_01s0137g00670	VIT_04s0023g03740
								VIT_19s0085g00560	VIT_17s0000g01980					VIT_15s0045g00980	VIT_13s0019g02020
								VIT_14s0083g00720	VIT_11s0016g00110					VIT_15s0045g00880	VIT_03s0038g02170
								VIT_14s0060g00870	VIT_01s0026g00260					VIT_00s0455g00050	VIT_18s0001g11930
								VIT_14s0060g00270	VIT_11s0103g00010					VIT_15s0045g00680	VIT_08s0007g07620
								VIT_09s0002g02370	VIT_08s0058g01430					VIT_03s0017g00920	VIT_07s0005g06420
								VIT_09s0002g03210	VIT_05s0049g01040					VIT_10s0071g00150	VIT_03s0063g00280
								VIT_19s0014g02220	VIT_07s0151g01010					VIT_15s0045g00710	VIT_19s0015g01220
								VIT_08s0058g00760	VIT_12s0059g00750					VIT_12s0034g02530	VIT_11s0016g01910
								VIT_17s0000g07620	VIT_13s0156g00220					VIT_12s0057g01130	VIT_08s0007g04310
								VIT_08s0040g02940	VIT_03s0063g02520					VIT_10s0071g00190	VIT_04s0008g05990
								VIT_15s0046g02180	VIT_04s0023g01000					VIT_07s0197g00240	VIT_12s0057g00500
								VIT_08s0040g01530	VIT_11s0016g02940					VIT_00s0487g00050	VIT_16s0050g02160
								VIT_10s0003g00160	VIT_07s0005g01430					VIT_07s0197g00090	VIT_18s0072g01090
								VIT_01s0026g02130	VIT_14s0083g00520					VIT_18s0001g03900	VIT_09s0002g07030
								VIT_17s0000g05090	VIT_13s0067g00140					VIT_18s0075g00480	VIT_06s0004g05150
								VIT_01s0127g00660	VIT_17s0000g08970					VIT_18s0041g01340	VIT_18s0001g02050
								VIT_08s0007g03380	VIT_01s0011g06590					VIT_05s0029g00780	VIT_01s0150g00190
								VIT_17s0000g04710	VIT_19s0090g01470					VIT_18s0117g00360	VIT_06s0004g08150
								VIT_05s0020g01260	VIT_08s0007g01370					VIT_12s0034g00910	VIT_15s0021g01220
								VIT_04s0008g05050	VIT_13s0156g00090					VIT_18s0089g00600	VIT_14s0030g01860
								VIT_00s0271g00070	VIT_06s0004g00880					VIT_18s0001g03260	VIT_06s0080g01110
								VIT_02s0087g00360	VIT_14s0060g02260					VIT_05s0029g00880	VIT_14s0066g02370
								VIT_06s0004g06420	VIT_01s0150g00480					VIT_05s0029g00750	VIT_16s0050g02500
								VIT_09s0096g00100	VIT_18s0001g01030					VIT_12s0034g01350	VIT_15s0046g00310
								VIT_06s0009g02740	VIT_11s0016g03830					VIT_18s0001g03710	VIT_07s0104g01550
								VIT_05s0049g02300	VIT_02s0025g03250					VIT_18s0041g02120	VIT_03s0063g00620
								VIT_16s0022g01780	VIT_03s0063g02510					VIT_18s0001g06110	VIT_11s0149g00190
								VIT_18s0001g05980	VIT_06s0004g07070					VIT_09s0002g08290	VIT_15s0021g01350
								VIT_09s0002g08580	VIT_18s0001g01680					VIT_07s0197g00170	VIT_07s0151g00790
								VIT_15s0048g02620	VIT_15s0024g01750					VIT_09s0002g08240	VIT_14s0066g00650
								VIT_01s0011g01100	VIT_18s0001g00720					VIT_13s0158g00170	VIT_17s0000g04740
								VIT_14s0066g00420	VIT_17s0000g01460					VIT_13s0064g00410	VIT_13s0019g02400
								VIT_09s0002g02250	VIT_06s0004g00220					VIT_13s0139g00220	VIT_03s0017g00870
								VIT_12s0057g00740	VIT_08s0056g00150					VIT_13s0067g00910	VIT_15s0048g00370
								VIT_15s0046g01830	VIT_14s0006g01240					VIT_13s0139g00030	VIT_09s0002g00390
								VIT_16s0013g00200	VIT_07s0031g00480					VIT_13s0084g00060	VIT_00s0880g00020
								VIT_10s0003g00970	VIT_12s0028g00310					VIT_14s0030g00960	VIT_05s0049g01770
								VIT_18s0001g07250	VIT_16s0039g02400					VIT_00s0487g00030	VIT_12s0028g01160
								VIT_10s0003g01540	VIT_07s0031g02180					VIT_18s0001g11250	VIT_12s0028g01150
								VIT_00s0771g00010	VIT_12s0059g01820					VIT_04s0023g02380	VIT_07s0104g00090
								VIT_04s0008g07050	VIT_11s0016g04500					VIT_15s0024g00400	VIT_07s0104g01320
								VIT_14s0006g00170	VIT_12s0059g01170					VIT_08s0007g04750	VIT_19s0014g00320
								VIT_12s0059g01950	VIT_04s0008g07320					VIT_07s0141g00770	VIT_08s0007g02160
								VIT_15s0046g03020	VIT_16s0050g02570					VIT_13s0064g01300	VIT_08s0056g00610
								VIT_01s0010g01460	VIT_04s0008g00740					VIT_19s0177g00170	VIT_04s0008g01850
								VIT_03s0038g02080	VIT_12s0028g00410					VIT_03s0063g02680	VIT_04s0008g05130
								VIT_05s0049g01270	VIT_16s0050g02680					VIT_14s0066g00810	VIT_14s0030g01800
								VIT_02s0087g00760	VIT_11s0118g00700					VIT_18s0001g13280	VIT_11s0016g01300
								VIT_18s0001g15340	VIT_06s0004g05460					VIT_05s0020g01490	VIT_06s0061g00020
								VIT_17s0000g06770	VIT_13s0019g02200					VIT_14s0060g02150	VIT_19s0014g01250
								VIT_07s0151g00620	VIT_11s0037g00160					VIT_08s0040g02660	VIT_09s0018g01630
								VIT_13s0067g02100	VIT_00s0226g00070					VIT_14s0060g00280	VIT_14s0108g00440
								VIT_01s0010g01780	VIT_04s0023g00790					VIT_11s0016g03860	VIT_03s0088g00380
								VIT_01s0011g04690	VIT_13s0019g04080					VIT_11s0037g00010	VIT_00s1322g00010
								VIT_10s0597g00040	VIT_02s0012g01000					VIT_14s0068g00840	VIT_08s0040g00980
								VIT_00s0394g00020	VIT_09s0002g00200					VIT_17s0000g08370	VIT_08s0007g01630
								VIT_09s0002g07510	VIT_18s0041g00560					VIT_16s0039g00700	VIT_06s0004g05870
								VIT_09s0002g00230	VIT_18s0041g00670					VIT_04s0008g03930	VIT_10s0003g05320
								VIT_11s0016g01090	VIT_18s0041g00550					VIT_01s0011g05880	VIT_02s0025g03680
								VIT_18s0001g13220	VIT_18s0041g00650					VIT_19s0014g00500	VIT_15s0046g01350
								VIT_12s0055g00970	VIT_00s0558g00030					VIT_00s0484g00020	VIT_04s0043g00900
								VIT_00s0179g00220	VIT_04s0008g01730					VIT_01s0011g04270	VIT_10s0003g04240
								VIT_01s0011g00920	VIT_11s0016g01400					VIT_16s0039g01330	VIT_03s0038g03680
								VIT_04s0044g01550	VIT_06s0004g03660					VIT_16s0148g00060	VIT_16s0098g01190
								VIT_14s0068g01170	VIT_06s0004g03650					VIT_16s0050g02720	VIT_14s0219g00210
								VIT_18s0001g09690	VIT_08s0040g03120					VIT_16s0148g00210	VIT_06s0061g00070
								VIT_08s0007g03290	VIT_15s0048g02540					VIT_16s0098g00190	VIT_06s0004g00730
								VIT_17s0000g01990	VIT_13s0074g00400					VIT_16s0050g01690	VIT_19s0090g00080
								VIT_15s0021g00360	VIT_13s0019g05160					VIT_04s0008g02510	VIT_19s0090g00120
								VIT_10s0003g04330	VIT_09s0002g07880					VIT_10s0116g00150	VIT_18s0001g14530
								VIT_14s0060g00200	VIT_14s0060g01280					VIT_00s0262g00010	VIT_00s0199g00030
								VIT_15s0021g01680	VIT_13s0074g00210					VIT_17s0000g08760	VIT_02s0012g01340
								VIT_10s0003g00070	VIT_08s0007g07600					VIT_12s0057g00800	VIT_11s0118g00280
								VIT_18s0072g01010	VIT_07s0151g00090					VIT_02s0241g00120	VIT_06s0009g00320
								VIT_17s0053g00240	VIT_15s0046g02750					VIT_14s0068g00940	VIT_17s0119g00050
								VIT_14s0081g00700	VIT_15s0045g00710					VIT_01s0011g06150	VIT_07s0005g02160
								VIT_19s0093g00480	VIT_18s0117g00080					VIT_04s0043g00160	VIT_13s0019g02860
								VIT_16s0022g01760	VIT_15s0107g00290					VIT_19s0014g03400	VIT_00s0218g00220
								VIT_17s0000g03980	VIT_13s0158g00170					VIT_11s0016g03880	VIT_11s0052g01600
								VIT_09s0002g06030	VIT_12s0035g01150					VIT_01s0011g02460	VIT_16s0050g01680
								VIT_12s0035g00720	VIT_08s0007g04740					VIT_06s0004g06430	VIT_16s0039g02230
								VIT_12s0055g01000	VIT_19s0014g01160					VIT_16s0022g01640	VIT_09s0002g06590
								VIT_01s0026g00610	VIT_00s1506g00010					VIT_16s0098g00210	VIT_05s0062g00430
								VIT_00s0567g00020	VIT_14s0066g00180					VIT_16s0050g01700	VIT_05s0094g01030
								VIT_12s0055g01030	VIT_06s0004g05550					VIT_16s0050g01720	VIT_05s0077g02300
								VIT_14s0068g01920	VIT_11s0016g05700					VIT_16s0022g01650	VIT_18s0041g01040
								VIT_01s0010g02000	VIT_02s0025g02530					VIT_01s0011g03890	VIT_16s0050g01600
								VIT_12s0055g01020	VIT_15s0048g02830					VIT_01s0011g04290	VIT_00s0218g00150
								VIT_01s0010g02020	VIT_11s0016g03640					VIT_01s0011g04300	VIT_04s0069g00990
								VIT_07s0129g00360	VIT_18s0001g14670					VIT_08s0056g01290	VIT_05s0077g01070
								VIT_18s0001g06890	VIT_12s0028g02630					VIT_07s0129g00920	VIT_18s0001g03000
								VIT_08s0007g03970	VIT_17s0000g08960					VIT_18s0001g08230	VIT_01s0011g00080
								VIT_01s0011g01520	VIT_14s0066g00680					VIT_18s0041g01350	VIT_03s0091g00250
								VIT_18s0001g12050	VIT_08s0217g00030					VIT_11s0016g01990	VIT_07s0005g00120
								VIT_18s0001g12060	VIT_07s0005g00110					VIT_07s0005g00770	VIT_03s0088g00490
								VIT_04s0008g03860	VIT_07s0031g00540					VIT_16s0039g02260	VIT_19s0014g03670
								VIT_05s0049g01420	VIT_13s0019g03650					VIT_07s0031g00610	VIT_18s0072g01160
								VIT_14s0066g00640	VIT_13s0019g04680					VIT_16s0050g00080	VIT_04s0008g00850
								VIT_12s0055g01240	VIT_04s0008g04150					VIT_15s0046g03180	VIT_03s0063g01950
								VIT_01s0011g05470	VIT_04s0008g04050					VIT_04s0023g02020	VIT_01s0010g03890
								VIT_06s0061g01180	VIT_04s0008g04090					VIT_02s0025g00510	VIT_00s0267g00030
								VIT_07s0031g03130	VIT_04s0008g04020					VIT_10s0003g05430	VIT_05s0062g00260
								VIT_14s0060g01560	VIT_01s0011g05880					VIT_17s0000g09640	VIT_08s0007g03220
								VIT_07s0151g00870	VIT_03s0063g00210					VIT_01s0137g00460	VIT_11s0149g00060
								VIT_07s0104g00200	VIT_01s0150g00020					VIT_08s0007g01380	VIT_00s0256g00050
								VIT_07s0104g00220	VIT_08s0040g00060					VIT_14s0006g03260	VIT_14s0060g00990
								VIT_07s0104g00210	VIT_16s0022g01620					VIT_16s0100g00640	VIT_03s0017g02210
								VIT_16s0039g01360	VIT_02s0025g01040					VIT_02s0025g04130	VIT_12s0034g02510
								VIT_16s0039g01120	VIT_08s0007g02290					VIT_10s0092g00090	VIT_00s0391g00030
								VIT_16s0039g01320	VIT_05s0062g01070					VIT_13s0064g00170	VIT_00s0211g00170
								VIT_16s0039g01110	VIT_17s0000g05570					VIT_07s0151g01110	VIT_18s0075g00270
								VIT_16s0039g01100	VIT_09s0002g07060					VIT_09s0018g01270	VIT_08s0007g03310
								VIT_16s0039g01130	VIT_16s0098g00400					VIT_13s0019g02050	VIT_09s0002g03350
								VIT_11s0016g01660	VIT_07s0031g02910					VIT_01s0182g00050	VIT_18s0072g00270
								VIT_00s2849g00010	VIT_13s0073g00600					VIT_04s0043g00310	VIT_18s0001g08750
								VIT_11s0016g01520	VIT_07s0129g00920					VIT_17s0000g06450	VIT_08s0040g02930
								VIT_16s0039g01300	VIT_07s0005g04220					VIT_10s0116g00600	VIT_11s0016g00580
								VIT_16s0039g01170	VIT_18s0041g01350					VIT_13s0047g00170	VIT_08s0040g02960
								VIT_03s0063g02560	VIT_06s0009g03550					VIT_15s0046g01820	VIT_04s0023g01760
								VIT_17s0000g04630	VIT_13s0019g02280					VIT_07s0191g00230	VIT_19s0014g01280
								VIT_01s0182g00150	VIT_01s0137g00230					VIT_19s0014g00790	VIT_09s0002g08680
								VIT_01s0182g00140	VIT_08s0007g00930					VIT_19s0014g00710	VIT_08s0040g00480
								VIT_09s0002g02450	VIT_16s0050g02340					VIT_10s0003g02000	VIT_01s0127g00340
								VIT_07s0031g02290	VIT_16s0050g02350					VIT_10s0003g01880	VIT_10s0003g00210
								VIT_14s0068g01260	VIT_19s0085g00040					VIT_19s0014g00830	VIT_05s0049g01720
								VIT_05s0020g00740	VIT_18s0075g00220					VIT_10s0003g01990	VIT_11s0016g04330
								VIT_13s0019g03270	VIT_18s0001g10420					VIT_12s0028g01350	VIT_04s0008g04550
								VIT_17s0000g08560	VIT_08s0007g08280					VIT_12s0034g02220	VIT_16s0050g02190
								VIT_18s0001g06140	VIT_16s0050g00080					VIT_04s0008g01220	VIT_00s2582g00010
								VIT_06s0061g00380	VIT_15s0046g03180					VIT_07s0031g01490	VIT_11s0016g05790
								VIT_09s0002g06990	VIT_12s0028g03190					VIT_16s0039g00660	VIT_00s1403g00010
								VIT_04s0023g02150	VIT_01s0011g04030					VIT_13s0064g00190	VIT_13s0067g02390
								VIT_15s0046g00440	VIT_05s0029g00640					VIT_18s0001g05840	VIT_04s0008g01250
								VIT_00s0407g00070	VIT_09s0002g03660					VIT_13s0019g03610	VIT_09s0002g06300
								VIT_01s0011g04370	VIT_19s0085g01000					VIT_01s0011g00420	VIT_11s0118g00650
								VIT_15s0045g00380	VIT_05s0062g00780					VIT_01s0011g00990	VIT_05s0124g00100
								VIT_11s0016g02850	VIT_15s0021g01130					VIT_00s0231g00040	VIT_01s0010g03060
								VIT_14s0108g00540	VIT_18s0001g00610					VIT_00s0238g00130	VIT_00s1616g00010
								VIT_18s0001g08030	VIT_03s0038g03620					VIT_12s0034g01270	VIT_05s0077g02270
								VIT_04s0008g06620	VIT_13s0019g02710					VIT_18s0041g01750	VIT_08s0007g01490
								VIT_02s0025g04620	VIT_08s0007g06200					VIT_18s0041g01330	VIT_12s0059g01290
								VIT_05s0077g01830	VIT_16s0098g01280					VIT_05s0029g00870	VIT_01s0150g00110
								VIT_13s0047g01210	VIT_05s0020g01120					VIT_19s0027g01700	VIT_12s0059g00470
								VIT_17s0000g04450	VIT_14s0006g03260					VIT_09s0002g03870	VIT_07s0104g00500
								VIT_09s0002g01730	VIT_19s0014g00180					VIT_09s0002g06260	VIT_01s0026g00030
								VIT_01s0011g02480	VIT_17s0000g08000					VIT_10s0003g02660	VIT_16s0022g01870
								VIT_18s0001g04420	VIT_11s0016g00830					VIT_05s0051g00170	VIT_05s0165g00200
								VIT_08s0007g03960	VIT_10s0003g03160					VIT_14s0060g02140	VIT_01s0011g02310
								VIT_08s0007g03280	VIT_00s0616g00020					VIT_14s0030g01590	VIT_15s0021g00530
								VIT_13s0019g02070	VIT_00s0873g00010					VIT_18s0122g01290	VIT_14s0066g00060
								VIT_09s0002g05200	VIT_13s0101g00220					VIT_19s0093g00510	VIT_01s0011g05340
								VIT_00s2579g00010	VIT_03s0088g00280					VIT_10s0003g03830	VIT_00s0515g00030
								VIT_16s0050g00410	VIT_03s0038g00910					VIT_05s0020g00670	VIT_02s0025g04960
								VIT_18s0001g09110	VIT_19s0014g01350					VIT_14s0066g01810	VIT_16s0100g01250
								VIT_07s0031g02390	VIT_12s0028g02160					VIT_14s0066g01820	VIT_05s0051g00680
								VIT_13s0019g01270	VIT_10s0003g01280					VIT_13s0067g02190	VIT_13s0019g03180
								VIT_09s0002g00080	VIT_14s0036g00540					VIT_13s0019g04610	VIT_01s0010g02240
								VIT_19s0014g02360	VIT_08s0007g00840					VIT_18s0001g09230	VIT_18s0001g12300
								VIT_03s0063g01740	VIT_17s0000g03690					VIT_11s0052g01480	VIT_18s0001g00040
								VIT_05s0062g01120	VIT_04s0043g00310					VIT_07s0005g01330	VIT_08s0007g06500
								VIT_11s0052g00440	VIT_17s0000g06450					VIT_13s0019g01810	VIT_04s0023g01170
								VIT_13s0067g03790	VIT_04s0023g00400					VIT_13s0019g01710	VIT_05s0020g03650
								VIT_06s0061g01560	VIT_13s0047g00170					VIT_06s0004g04980	VIT_05s0020g03640
								VIT_17s0053g00460	VIT_00s0207g00090					VIT_13s0019g01220	VIT_05s0077g00530
								VIT_02s0033g00270	VIT_11s0016g00970					VIT_19s0090g01740	VIT_16s0098g01740
								VIT_05s0062g01190	VIT_08s0007g00720					VIT_00s0463g00020	VIT_00s0802g00020
								VIT_19s0090g01530	VIT_03s0063g01890					VIT_06s0004g04960	VIT_08s0007g07110
								VIT_14s0060g00430	VIT_15s0021g00890					VIT_18s0001g12950	VIT_06s0004g02230
								VIT_14s0006g02510	VIT_08s0007g04150					VIT_03s0038g04470	VIT_19s0027g01640
								VIT_18s0001g06610	VIT_08s0007g07820					VIT_17s0000g08850	VIT_12s0035g00840
								VIT_01s0011g06060	VIT_07s0031g02500					VIT_06s0080g00980	VIT_08s0040g00440
								VIT_18s0001g03950	VIT_16s0039g00660					VIT_08s0058g00790	VIT_06s0080g00760
								VIT_16s0050g01110	VIT_12s0035g01890					VIT_13s0019g03350	VIT_18s0001g09450
								VIT_13s0064g01370	VIT_01s0137g00270					VIT_00s0684g00030	VIT_06s0004g01320
								VIT_06s0004g01750	VIT_04s0159g00020					VIT_02s0012g00280	VIT_05s0077g01510
								VIT_09s0054g01080	VIT_03s0063g01050					VIT_11s0065g00370	VIT_06s0061g00140
								VIT_19s0014g02090	VIT_07s0005g03980					VIT_01s0011g05250	VIT_04s0023g03360
								VIT_00s0480g00030	VIT_05s0049g01660					VIT_07s0141g00020	VIT_10s0116g01820
								VIT_00s0480g00070	VIT_19s0027g00590					VIT_18s0072g00840	VIT_06s0004g02790
								VIT_10s0116g00560	VIT_01s0026g01970					VIT_16s0013g01920	VIT_07s0005g01470
								VIT_00s0480g00040	VIT_11s0016g03220					VIT_16s0098g00420	VIT_03s0038g02660
								VIT_14s0066g00920	VIT_06s0004g08230					VIT_00s0194g00120	VIT_11s0103g00310
								VIT_18s0001g12290	VIT_03s0038g00270					VIT_13s0158g00080	VIT_05s0062g01360
								VIT_11s0052g01030	VIT_18s0001g04680					VIT_10s0042g01050	VIT_13s0019g03390
								VIT_07s0129g00170	VIT_14s0068g00970					VIT_11s0037g00740	VIT_17s0000g02040
								VIT_11s0016g04750	VIT_02s0012g02720					VIT_18s0001g08840	VIT_03s0088g01160
								VIT_02s0025g03300	VIT_01s0010g03600					VIT_04s0023g00700	VIT_03s0063g02290
								VIT_18s0122g00410	VIT_14s0060g02140					VIT_11s0206g00110	VIT_05s0049g00440
								VIT_14s0219g00130	VIT_07s0005g00170					VIT_13s0019g04030	VIT_10s0003g02780
								VIT_17s0000g05310	VIT_14s0006g02080					VIT_10s0003g01230	VIT_08s0007g06340
								VIT_05s0102g00480	VIT_19s0093g00510					VIT_16s0013g01410	VIT_18s0001g00160
								VIT_08s0058g00560	VIT_07s0005g02230					VIT_04s0008g05380	VIT_18s0001g12090
								VIT_14s0081g00090	VIT_13s0067g02190					VIT_04s0210g00190	VIT_07s0005g01050
								VIT_06s0061g01300	VIT_18s0001g04010					VIT_14s0068g01300	VIT_02s0033g01340
								VIT_10s0116g01670	VIT_07s0005g01330					VIT_11s0052g00700	VIT_04s0044g00500
								VIT_09s0002g08070	VIT_18s0001g13960					VIT_07s0095g00290	VIT_15s0021g02070
								VIT_02s0025g01420	VIT_08s0056g00050					VIT_17s0000g03510	VIT_00s0499g00020
								VIT_08s0007g07130	VIT_02s0025g04000					VIT_14s0030g01660	VIT_06s0004g01730
								VIT_15s0021g02050	VIT_04s0023g01660					VIT_08s0056g00570	VIT_09s0018g01290
								VIT_02s0025g00150	VIT_10s0003g05480					VIT_18s0041g01290	VIT_16s0098g00590
								VIT_15s0048g02350	VIT_19s0015g00760					VIT_00s0286g00140	VIT_12s0028g03620
								VIT_14s0171g00430	VIT_03s0038g04470					VIT_19s0014g04130	VIT_07s0005g02170
								VIT_19s0015g00830	VIT_03s0038g04480					VIT_19s0014g04080	VIT_18s0001g11350
								VIT_19s0015g00840	VIT_05s0020g03350					VIT_01s0011g03010	VIT_00s0179g00320
								VIT_03s0088g01180	VIT_06s0080g00980					VIT_07s0031g02130	VIT_14s0060g01780
								VIT_14s0066g02170	VIT_13s0019g03350					VIT_12s0057g00520	VIT_00s0225g00160
								VIT_03s0091g00520	VIT_14s0066g02360					VIT_02s0025g00480	VIT_16s0039g01020
								VIT_18s0001g00950	VIT_05s0020g04880					VIT_04s0044g01260	VIT_11s0118g00770
								VIT_18s0001g00510	VIT_16s0039g02550					VIT_05s0077g00550	VIT_07s0005g02450
								VIT_07s0255g00060	VIT_00s0225g00110					VIT_07s0005g02100	VIT_18s0001g05370
								VIT_07s0141g00640	VIT_04s0008g02590					VIT_15s0048g02010	VIT_06s0004g05790
								VIT_00s0215g00020	VIT_00s0684g00030					VIT_06s0004g00260	VIT_13s0156g00100
								VIT_09s0002g00170	VIT_11s0016g00690					VIT_16s0050g00750	VIT_08s0007g08780
								VIT_09s0002g05800	VIT_11s0065g00370					VIT_11s0016g03890	VIT_07s0151g00290
								VIT_00s0215g00040	VIT_05s0077g02100					VIT_15s0024g00640	VIT_04s0008g05520
								VIT_01s0182g00070	VIT_18s0001g05020					VIT_11s0037g00300	VIT_17s0000g05830
								VIT_08s0007g01980	VIT_15s0021g00940					VIT_08s0040g00890	VIT_00s0264g00050
								VIT_13s0084g00650	VIT_14s0083g01050					VIT_07s0031g02510	VIT_18s0001g09260
								VIT_04s0008g03120	VIT_14s0006g01420					VIT_16s0050g01860	VIT_13s0147g00230
								VIT_18s0001g02510	VIT_00s1830g00010					VIT_00s0374g00020	VIT_07s0005g01190
								VIT_09s0002g04250	VIT_03s0063g00860					VIT_12s0134g00450	VIT_13s0064g00950
								VIT_12s0059g01560	VIT_05s0020g02600					VIT_05s0049g01200	VIT_15s0021g01860
								VIT_18s0001g14690	VIT_09s0018g01420					VIT_00s0456g00020	VIT_16s0050g02260
								VIT_00s0772g00010	VIT_16s0098g00710					VIT_10s0116g00170	VIT_02s0154g00200
								VIT_11s0016g01830	VIT_18s0001g11270					VIT_12s0134g00270	VIT_17s0000g09700
								VIT_02s0025g01100	VIT_00s0388g00010					VIT_19s0014g04630	VIT_09s0018g02110
								VIT_19s0027g00390	VIT_01s0026g00180					VIT_19s0014g04580	VIT_13s0064g00460
								VIT_18s0001g03810	VIT_04s0008g00530					VIT_19s0014g04590	VIT_19s0085g00900
								VIT_19s0014g01530	VIT_12s0028g03360					VIT_19s0014g04600	VIT_10s0003g01310
								VIT_16s0039g01870	VIT_00s0515g00050					VIT_19s0014g04470	VIT_05s0020g01440
								VIT_13s0158g00120	VIT_08s0007g07970					VIT_19s0014g04640	VIT_05s0020g01270
								VIT_01s0011g03800	VIT_06s0004g01780					VIT_19s0014g04280	VIT_00s0189g00010
								VIT_08s0040g01580	VIT_01s0011g03010					VIT_19s0014g04530	VIT_17s0000g03130
								VIT_08s0040g01570	VIT_13s0156g00060					VIT_18s0086g00210	VIT_02s0025g02720
								VIT_18s0122g01270	VIT_19s0090g01290					VIT_08s0007g00140	VIT_06s0004g04560
								VIT_04s0044g00050	VIT_09s0002g08540					VIT_12s0028g01390	VIT_10s0003g04050
								VIT_03s0038g03800	VIT_04s0008g06250					VIT_09s0002g00640	VIT_15s0048g00650
								VIT_13s0019g01080	VIT_05s0029g00080					VIT_02s0025g03970	VIT_08s0040g01680
								VIT_08s0058g01290	VIT_08s0056g00010					VIT_17s0000g06860	VIT_03s0017g01970
								VIT_06s0004g04580	VIT_18s0072g00390					VIT_07s0197g00080	VIT_19s0014g03220
								VIT_10s0116g00440	VIT_01s0011g05690					VIT_02s0236g00130	VIT_05s0077g02120
								VIT_18s0001g10470	VIT_07s0031g03150					VIT_11s0016g02720	VIT_13s0064g01330
								VIT_03s0091g00580	VIT_02s0087g00190					VIT_06s0004g03000	VIT_18s0001g09980
								VIT_13s0019g04920	VIT_12s0035g01060					VIT_02s0033g01370	VIT_08s0007g00210
								VIT_08s0007g04850	VIT_06s0061g00620					VIT_05s0077g00810	VIT_07s0255g00050
								VIT_01s0010g02350	VIT_10s0092g00470					VIT_19s0014g00070	VIT_11s0078g00260
								VIT_04s0008g04270	VIT_01s0011g00300					VIT_16s0098g01780	VIT_01s0026g02100
								VIT_09s0070g00490	VIT_10s0003g04910					VIT_10s0116g01730	VIT_05s0020g04500
								VIT_03s0091g00470	VIT_18s0001g14860					VIT_04s0008g06890	VIT_19s0014g02800
								VIT_05s0020g01460	VIT_03s0038g02480					VIT_16s0100g00300	VIT_15s0048g00850
								VIT_04s0023g00690	VIT_13s0139g00260					VIT_08s0007g03270	VIT_05s0049g01390
								VIT_14s0060g02070	VIT_09s0002g00640					VIT_01s0011g00380	VIT_02s0025g00550
								VIT_13s0067g03500	VIT_04s0008g01550					VIT_19s0014g02660	VIT_17s0000g06630
								VIT_00s0434g00020	VIT_04s0008g02620					VIT_18s0122g00380	VIT_08s0058g01420
								VIT_18s0001g10700	VIT_14s0108g01230					VIT_14s0060g02390	VIT_09s0002g00260
								VIT_04s0008g04780	VIT_07s0197g00080					VIT_05s0020g01400	VIT_13s0067g03020
								VIT_07s0005g02110	VIT_09s0002g07010					VIT_04s0044g00750	VIT_00s0238g00020
								VIT_03s0038g02650	VIT_04s0008g00630					VIT_04s0044g00720	VIT_16s0022g02370
								VIT_08s0007g00310	VIT_19s0014g01710					VIT_06s0004g01390	VIT_05s0077g01370
								VIT_07s0005g02630	VIT_04s0008g06890					VIT_05s0020g03270	VIT_00s0665g00030
								VIT_19s0014g01900	VIT_07s0031g01410					VIT_06s0004g01380	VIT_13s0067g02530
								VIT_19s0014g01020	VIT_06s0004g07830					VIT_12s0028g01650	VIT_05s0077g01980
								VIT_05s0020g05040	VIT_17s0000g08830					VIT_13s0156g00610	VIT_03s0063g02540
								VIT_02s0087g00750	VIT_19s0140g00210					VIT_05s0020g03240	VIT_06s0004g05950
								VIT_06s0004g05040	VIT_01s0011g00370					VIT_04s0044g00730	VIT_17s0000g07840
								VIT_15s0021g00430	VIT_17s0000g05160					VIT_00s0398g00020	VIT_00s0299g00070
								VIT_04s0023g01060	VIT_02s0025g00250					VIT_19s0014g04150	VIT_19s0090g00500
								VIT_06s0004g06080	VIT_15s0021g00140					VIT_18s0001g10370	VIT_19s0027g01850
								VIT_08s0007g01320	VIT_05s0020g03200					VIT_00s0878g00020	VIT_13s0067g02710
								VIT_08s0007g01310	VIT_08s0007g07090					VIT_15s0048g02600	VIT_18s0122g00290
								VIT_12s0035g01820	VIT_03s0038g02620					VIT_02s0025g02790	VIT_05s0049g00120
								VIT_03s0091g00120	VIT_00s0818g00010					VIT_10s0003g02880	VIT_04s0008g04200
								VIT_14s0060g01270	VIT_09s0054g01600					VIT_00s0561g00020	VIT_00s0508g00040
								VIT_07s0104g00850	VIT_06s0004g00200					VIT_10s0597g00010	VIT_05s0094g01430
								VIT_10s0003g01730	VIT_12s0028g03350					VIT_19s0014g03130	VIT_09s0002g05930
								VIT_05s0077g01770	VIT_02s0025g02790					VIT_17s0000g04840	VIT_18s0072g00150
								VIT_11s0078g00460	VIT_17s0000g00490					VIT_19s0015g01790	VIT_04s0008g06980
								VIT_18s0001g06950	VIT_01s0146g00520					VIT_07s0031g00790	VIT_02s0241g00050
								VIT_18s0001g06910	VIT_08s0032g00660					VIT_08s0058g01450	VIT_18s0164g00010
								VIT_15s0021g00650	VIT_05s0102g01170					VIT_07s0031g01530	VIT_14s0066g00050
								VIT_11s0016g00010	VIT_07s0031g01530					VIT_14s0030g00470	VIT_10s0092g00640
								VIT_03s0038g00250	VIT_00s1286g00010					VIT_15s0024g00820	VIT_09s0002g04620
								VIT_03s0038g00230	VIT_08s0007g05360					VIT_10s0071g00250	VIT_12s0059g01900
								VIT_05s0051g00640	VIT_04s0210g00080					VIT_09s0002g00150	VIT_18s0001g02500
								VIT_06s0009g00680	VIT_00s0445g00010					VIT_13s0019g03870	VIT_04s0008g03570
								VIT_00s0199g00240	VIT_00s0776g00010					VIT_08s0007g01280	VIT_08s0040g02680
								VIT_08s0007g05600	VIT_16s0022g00060					VIT_04s0008g01060	VIT_03s0038g03550
								VIT_08s0217g00100	VIT_13s0064g00180					VIT_08s0058g00450	VIT_03s0063g01360
								VIT_01s0146g00310	VIT_16s0022g02200					VIT_00s0454g00010	VIT_10s0003g03010
								VIT_14s0060g00420	VIT_09s0002g01040					VIT_16s0098g00950	VIT_06s0004g02860
								VIT_08s0007g05430	VIT_10s0003g02170					VIT_18s0001g10350	VIT_03s0091g00660
								VIT_06s0004g00130	VIT_06s0004g05570					VIT_00s0454g00030	VIT_14s0060g00900
								VIT_10s0071g01060	VIT_10s0092g00170					VIT_18s0001g10330	VIT_18s0001g05480
								VIT_08s0007g05490	VIT_04s0044g01970					VIT_16s0098g01160	VIT_07s0005g03990
								VIT_00s0179g00350	VIT_15s0048g01200					VIT_13s0019g02490	VIT_18s0001g14320
								VIT_08s0007g04170	VIT_15s0048g01180					VIT_13s0019g02480	VIT_06s0009g00230
								VIT_02s0025g02920	VIT_15s0048g01170					VIT_07s0005g00750	VIT_09s0002g07090
								VIT_18s0001g06460	VIT_03s0038g02230					VIT_08s0032g00840	VIT_11s0037g00730
								VIT_17s0000g09490	VIT_19s0015g00750					VIT_05s0029g01140	VIT_18s0001g09290
								VIT_01s0137g00670	VIT_05s0020g02260					VIT_11s0118g00200	VIT_18s0001g11970
								VIT_00s0274g00090	VIT_05s0020g02250					VIT_18s0089g00410	VIT_01s0011g05450
								VIT_07s0151g00260	VIT_18s0001g04930					VIT_00s0181g00010	VIT_14s0219g00090
								VIT_11s0052g00200	VIT_07s0031g00940					VIT_05s0020g03140	VIT_00s0317g00030
								VIT_03s0017g00920	VIT_07s0151g00340					VIT_05s0020g02170	VIT_00s0978g00020
								VIT_05s0102g01100	VIT_01s0011g04980					VIT_18s0001g14010	VIT_08s0056g00140
								VIT_12s0034g02530	VIT_14s0068g02110					VIT_05s0020g04210	VIT_09s0002g03470
								VIT_13s0064g00130	VIT_05s0124g00340					VIT_01s0026g02310	VIT_00s0333g00060
								VIT_12s0057g01130	VIT_05s0124g00330					VIT_01s0026g01960	VIT_19s0015g01230
								VIT_00s0238g00040	VIT_14s0068g01090					VIT_04s0008g05510	VIT_12s0034g01760
								VIT_18s0117g00360	VIT_19s0090g01460					VIT_14s0060g01540	VIT_03s0180g00100
								VIT_18s0089g00600	VIT_14s0060g00710					VIT_16s0039g01850	VIT_04s0023g03760
								VIT_18s0089g00270	VIT_03s0038g04720					VIT_18s0117g00340	VIT_19s0085g00990
								VIT_18s0001g06240	VIT_15s0046g01850					VIT_12s0035g00690	VIT_11s0016g04380
								VIT_05s0029g00750	VIT_04s0008g02770					VIT_18s0001g11120	VIT_07s0005g03390
								VIT_12s0034g01350	VIT_14s0128g00440					VIT_11s0037g01130	VIT_13s0067g01680
								VIT_18s0001g03710	VIT_12s0028g03330					VIT_03s0038g02930	VIT_07s0104g00470
								VIT_13s0139g00010	VIT_17s0000g04350					VIT_15s0046g00740	VIT_18s0075g00250
								VIT_13s0158g00400	VIT_09s0002g03460					VIT_11s0037g00840	VIT_01s0011g06580
								VIT_07s0197g00170	VIT_06s0004g07650					VIT_11s0037g00850	VIT_01s0011g04620
								VIT_00s2390g00010	VIT_14s0083g00150					VIT_07s0005g05720	VIT_12s0035g02080
								VIT_13s0139g00340	VIT_14s0068g01690					VIT_02s0025g04320	VIT_19s0085g00030
								VIT_17s0000g03080	VIT_11s0016g01890					VIT_02s0025g04330	VIT_00s0261g00040
								VIT_18s0001g11250	VIT_06s0004g02520					VIT_06s0004g06130	VIT_07s0005g01180
								VIT_13s0139g00130	VIT_09s0002g01480					VIT_10s0116g00530	VIT_04s0023g02970
								VIT_04s0023g02380	VIT_06s0004g08050					VIT_09s0002g04160	VIT_03s0063g02130
								VIT_15s0024g00400	VIT_18s0001g11120					VIT_09s0002g06560	VIT_01s0010g01210
								VIT_18s0001g07680	VIT_11s0016g02360					VIT_11s0016g02310	VIT_07s0031g02560
								VIT_16s0013g00520	VIT_13s0019g04050					VIT_08s0007g06700	VIT_08s0007g07790
								VIT_15s0021g00640	VIT_11s0037g01130					VIT_13s0019g04650	VIT_16s0022g00670
								VIT_00s0665g00040	VIT_19s0027g01680					VIT_18s0001g10510	VIT_01s0011g06000
								VIT_19s0177g00170	VIT_15s0107g00550					VIT_04s0023g00740	VIT_12s0057g00200
								VIT_16s0098g01220	VIT_10s0003g05230					VIT_00s0532g00030	VIT_18s0001g09940
								VIT_04s0008g01410	VIT_04s0023g03740					VIT_01s0026g01460	VIT_18s0072g00820
								VIT_16s0039g00700	VIT_04s0023g03720					VIT_18s0001g15310	VIT_10s0092g00360
								VIT_15s0024g01700	VIT_16s0100g00700					VIT_12s0028g02240	VIT_19s0090g01000
								VIT_16s0098g00190	VIT_08s0007g00760					VIT_10s0042g00200	VIT_18s0001g11620
								VIT_16s0022g01660	VIT_18s0001g14490					VIT_10s0042g00430	VIT_10s0003g05210
								VIT_16s0148g00010	VIT_04s0023g03550					VIT_18s0001g00820	VIT_14s0006g02600
								VIT_16s0050g01690	VIT_13s0019g02020					VIT_00s0199g00150	VIT_01s0026g01420
								VIT_00s0409g00010	VIT_03s0038g02170					VIT_08s0040g01400	VIT_15s0048g02390
								VIT_15s0024g01670	VIT_16s0098g00640					VIT_17s0000g01170	VIT_15s0046g00660
								VIT_00s2745g00010	VIT_17s0000g02470					VIT_14s0128g00050	VIT_15s0046g00520
								VIT_00s0748g00020	VIT_12s0034g01230					VIT_08s0040g00850	VIT_16s0098g00380
								VIT_00s0262g00010	VIT_19s0177g00140					VIT_18s0001g15360	VIT_04s0023g03320
								VIT_00s0437g00070	VIT_18s0001g10510					VIT_02s0154g00040	VIT_00s1206g00020
								VIT_00s0429g00010	VIT_04s0023g00740					VIT_15s0048g02500	VIT_11s0037g00820
								VIT_00s0262g00090	VIT_08s0040g00020					VIT_03s0063g02020	VIT_18s0089g00900
								VIT_00s0262g00120	VIT_00s0532g00030					VIT_11s0118g00470	VIT_18s0001g09670
								VIT_17s0000g08760	VIT_01s0026g01460					VIT_12s0034g01320	VIT_07s0031g01840
								VIT_11s0052g00350	VIT_14s0066g02560					VIT_18s0041g02210	VIT_08s0007g00570
								VIT_17s0000g09170	VIT_19s0014g02890					VIT_18s0041g00210	VIT_18s0001g10160
								VIT_10s0092g00710	VIT_19s0014g01470					VIT_07s0005g00180	VIT_17s0000g02460
								VIT_02s0087g00720	VIT_14s0128g00050					VIT_04s0008g03600	VIT_06s0061g00550
								VIT_19s0015g02410	VIT_13s0064g01080					VIT_16s0100g00410	VIT_08s0007g04950
								VIT_16s0050g02430	VIT_02s0154g00040					VIT_18s0072g00460	VIT_14s0128g00210
								VIT_11s0016g03880	VIT_02s0154g00060					VIT_08s0040g00990	VIT_13s0067g00610
								VIT_08s0007g02150	VIT_14s0171g00370					VIT_02s0025g03560	VIT_08s0040g00510
								VIT_16s0050g01720	VIT_04s0008g04950					VIT_18s0001g06270	VIT_12s0134g00400
								VIT_16s0039g01310	VIT_18s0001g07730					VIT_10s0003g01640	VIT_18s0001g13520
								VIT_01s0011g03890	VIT_17s0000g06570					VIT_14s0171g00230	VIT_09s0054g00530
								VIT_17s0000g03330	VIT_00s0181g00040					VIT_03s0063g02460	VIT_08s0007g05070
								VIT_16s0050g01700	VIT_18s0041g00220					VIT_05s0077g01160	VIT_02s0154g00220
								VIT_06s0080g01260	VIT_18s0041g01700					VIT_07s0104g00900	VIT_18s0001g03670
								VIT_14s0006g02630	VIT_01s0010g01740					VIT_07s0005g01420	VIT_07s0104g01620
								VIT_18s0001g08230	VIT_06s0004g03590					VIT_01s0026g00880	VIT_08s0040g01950
								VIT_04s0079g00290	VIT_18s0001g02050					VIT_19s0090g00420	VIT_15s0046g02070
								VIT_00s0226g00100	VIT_13s0067g03320					VIT_12s0059g02370	VIT_06s0004g08080
								VIT_08s0007g02810	VIT_03s0038g03940					VIT_19s0177g00100	VIT_06s0004g06930
								VIT_11s0016g01990	VIT_06s0004g05810					VIT_19s0027g00130	VIT_02s0087g00420
								VIT_06s0004g05990	VIT_08s0007g01520					VIT_02s0012g01630	VIT_11s0065g01210
								VIT_14s0060g02320	VIT_14s0030g01860					VIT_01s0146g00450	VIT_13s0019g03190
								VIT_01s0150g00440	VIT_04s0023g03240					VIT_04s0023g01270	VIT_01s0010g02220
								VIT_16s0100g01110	VIT_18s0001g07830					VIT_01s0026g00280	VIT_08s0040g00590
								VIT_16s0100g01070	VIT_07s0005g04630					VIT_17s0000g08010	VIT_19s0015g01000
								VIT_10s0003g05450	VIT_18s0001g07170					VIT_10s0003g01680	VIT_09s0002g01180
								VIT_10s0003g05430	VIT_13s0067g01130					VIT_16s0022g00660	VIT_08s0058g01270
								VIT_13s0019g04110	VIT_18s0164g00020					VIT_10s0003g02160	VIT_06s0004g06620
								VIT_01s0010g02160	VIT_17s0000g02670					VIT_03s0063g01510	VIT_15s0046g02210
								VIT_08s0007g00470	VIT_06s0004g06010					VIT_01s0011g05960	VIT_07s0031g02250
								VIT_12s0028g02200	VIT_19s0027g00790					VIT_12s0028g01670	VIT_05s0094g00470
								VIT_18s0001g03370	VIT_13s0019g04500					VIT_10s0003g02150	VIT_18s0001g09530
								VIT_12s0028g03420	VIT_19s0090g00420					VIT_09s0002g00990	VIT_09s0002g00800
								VIT_08s0040g01760	VIT_08s0032g00760					VIT_00s0394g00030	VIT_13s0064g00920
								VIT_05s0020g02560	VIT_11s0016g00020					VIT_07s0005g01240	VIT_16s0039g01570
								VIT_01s0011g04630	VIT_01s0146g00450					VIT_03s0091g00050	VIT_06s0061g00150
								VIT_02s0012g00530	VIT_18s0001g07120					VIT_18s0001g12770	VIT_07s0104g01460
								VIT_00s0225g00140	VIT_14s0068g01330					VIT_02s0025g03220	VIT_07s0005g02580
								VIT_06s0004g08260	VIT_04s0008g06930					VIT_06s0004g05430	VIT_14s0068g01530
								VIT_08s0007g03340	VIT_15s0021g00520					VIT_08s0007g00890	VIT_02s0025g02330
								VIT_17s0000g08500	VIT_08s0056g00610					VIT_06s0009g02340	VIT_08s0007g08060
								VIT_06s0004g02840	VIT_03s0088g01050					VIT_08s0007g07630	VIT_04s0008g05150
								VIT_14s0171g00250	VIT_18s0001g10430					VIT_08s0007g01480	VIT_09s0002g06110
								VIT_14s0006g00820	VIT_11s0118g00570					VIT_12s0055g00460	VIT_01s0010g03700
								VIT_05s0049g01310	VIT_02s0012g01410					VIT_07s0104g01290	VIT_03s0091g00260
								VIT_13s0019g04930	VIT_18s0001g04970					VIT_18s0001g12660	VIT_07s0141g00810
								VIT_01s0010g03370	VIT_06s0004g05430					VIT_03s0088g00400	VIT_01s0010g01670
								VIT_10s0003g03130	VIT_06s0004g05380					VIT_02s0025g03540	VIT_01s0011g01280
								VIT_05s0020g03480	VIT_14s0030g01800					VIT_11s0016g01120	VIT_06s0004g06940
								VIT_08s0007g07010	VIT_09s0018g01180					VIT_19s0014g02190	VIT_11s0052g00530
								VIT_07s0005g00560	VIT_19s0014g01250					VIT_07s0005g04480	VIT_09s0002g02210
								VIT_14s0060g02050	VIT_14s0108g00440					VIT_10s0597g00020	VIT_12s0059g00230
								VIT_07s0005g04150	VIT_03s0088g00380					VIT_14s0066g00160	VIT_04s0008g06670
								VIT_08s0007g04210	VIT_00s1322g00010					VIT_19s0014g01000	VIT_09s0002g02220
								VIT_13s0074g00140	VIT_00s0373g00010					VIT_04s0008g06230	VIT_09s0002g02150
								VIT_02s0025g00620	VIT_18s0001g08250					VIT_13s0019g04090	VIT_12s0059g00190
								VIT_14s0006g02470	VIT_08s0040g00980					VIT_03s0038g02390
								VIT_19s0027g00710	VIT_08s0007g01630					VIT_17s0000g07960
								VIT_00s0225g00020	VIT_06s0004g05870					VIT_02s0025g00070
								VIT_04s0008g00790	VIT_06s0009g02020					VIT_15s0046g00020
								VIT_18s0072g00340	VIT_02s0025g03680					VIT_18s0001g12620
								VIT_07s0031g01230	VIT_12s0028g03650					VIT_18s0166g00190
								VIT_13s0064g00850	VIT_05s0102g00080					VIT_01s0150g00330
								VIT_10s0003g02650	VIT_03s0038g03680					VIT_06s0061g01120
								VIT_01s0026g02410	VIT_03s0038g01240					VIT_03s0017g00680
								VIT_00s0317g00130	VIT_10s0003g01710					VIT_02s0025g04490
								VIT_15s0046g02690	VIT_13s0019g00910					VIT_01s0026g01890
								VIT_16s0050g00610	VIT_08s0007g00120					VIT_06s0004g07270
								VIT_01s0011g02080	VIT_17s0000g00610					VIT_17s0000g07070
								VIT_09s0002g04440	VIT_14s0108g00140					VIT_05s0062g00740
								VIT_15s0021g01000	VIT_01s0026g01770					VIT_16s0050g01660
								VIT_05s0102g01220	VIT_08s0032g00310					VIT_19s0014g00290
								VIT_12s0035g01020	VIT_06s0061g00070					VIT_14s0108g01600
								VIT_10s0116g00180	VIT_13s0019g04090					VIT_14s0108g01620
								VIT_08s0040g03200	VIT_06s0004g08200					VIT_14s0108g01590
								VIT_06s0004g00360	VIT_15s0046g01400					VIT_14s0108g01610
								VIT_15s0046g02140	VIT_19s0015g01190					VIT_03s0017g01990
								VIT_05s0094g00870	VIT_06s0004g04430					VIT_16s0115g00340
								VIT_00s0174g00190	VIT_02s0025g00070					VIT_05s0094g00990
								VIT_08s0007g06150	VIT_15s0046g02280					VIT_17s0000g07060
								VIT_09s0070g00130	VIT_18s0001g10100					VIT_04s0069g00770
								VIT_09s0054g00030	VIT_08s0007g02580					VIT_04s0044g01530
								VIT_09s0054g00010	VIT_01s0011g05630					VIT_06s0004g07280
								VIT_11s0052g00290	VIT_16s0050g00810					VIT_16s0050g01610
								VIT_14s0068g01640	VIT_03s0063g00180					VIT_04s0008g01190
								VIT_14s0083g00970	VIT_17s0000g08860					VIT_08s0007g04580
								VIT_04s0023g03210	VIT_10s0116g00210					VIT_08s0007g04610
								VIT_12s0034g01000	VIT_18s0041g00840					VIT_08s0007g04570
								VIT_15s0048g02610	VIT_11s0052g01580					VIT_06s0004g06540
								VIT_13s0074g00750	VIT_11s0016g02420					VIT_19s0014g01050
								VIT_02s0025g00310	VIT_04s0069g00990					VIT_17s0000g06930
								VIT_11s0037g00080	VIT_15s0048g00560					VIT_06s0004g05730
								VIT_09s0070g00050	VIT_14s0030g02230					VIT_07s0005g01350
								VIT_16s0022g01590	VIT_00s0203g00200					VIT_18s0001g08870
								VIT_08s0007g03020	VIT_03s0038g04750					VIT_08s0007g00710
								VIT_07s0141g00710	VIT_14s0060g01320					VIT_16s0050g01910
								VIT_08s0040g02460	VIT_12s0134g00430					VIT_00s0753g00010
								VIT_11s0016g02040	VIT_01s0011g00080					VIT_00s0265g00060
								VIT_13s0073g00120	VIT_14s0060g01300					VIT_00s0434g00060
								VIT_01s0011g00680	VIT_14s0066g01130					VIT_04s0008g05860
								VIT_17s0000g06980	VIT_19s0014g01270					VIT_08s0007g02590
								VIT_19s0014g02680	VIT_07s0005g00120					VIT_06s0004g02290
								VIT_13s0147g00060	VIT_02s0025g00860					VIT_14s0060g00980
								VIT_11s0016g00840	VIT_08s0007g00710					VIT_00s0264g00060
								VIT_06s0004g07560	VIT_10s0003g00220					VIT_04s0008g04810
								VIT_04s0008g01750	VIT_00s0411g00010					VIT_14s0068g00510
								VIT_09s0002g02640	VIT_09s0002g08420					VIT_08s0007g08240
								VIT_08s0058g00390	VIT_03s0088g00490					VIT_02s0012g01390
								VIT_06s0004g07150	VIT_13s0019g00920					VIT_17s0000g03680
								VIT_13s0067g01820	VIT_12s0057g00190					VIT_11s0016g02260
								VIT_08s0007g07220	VIT_18s0072g01160					VIT_03s0063g00350
								VIT_04s0043g00440	VIT_04s0008g01250					VIT_18s0001g08340
								VIT_12s0028g02100	VIT_10s0003g01630					VIT_02s0236g00120
								VIT_07s0191g00060	VIT_08s0007g03220					VIT_14s0068g01790
								VIT_18s0001g06290	VIT_08s0007g02590					VIT_01s0011g03760
								VIT_17s0000g03530	VIT_05s0077g00770					VIT_06s0004g04620
								VIT_05s0062g00120	VIT_13s0067g02610					VIT_15s0046g01460
								VIT_08s0105g00280	VIT_18s0001g14560					VIT_08s0040g02610
								VIT_01s0026g02110	VIT_00s2705g00010					VIT_16s0050g00970
								VIT_09s0002g00610	VIT_08s0007g03680					VIT_03s0091g01090
								VIT_15s0021g01910	VIT_14s0060g00990					VIT_00s1927g00010
								VIT_08s0058g01440	VIT_00s0199g00230					VIT_02s0025g04200
								VIT_05s0020g01410	VIT_03s0017g02210					VIT_08s0007g06280
								VIT_19s0027g00760	VIT_12s0059g02120					VIT_16s0100g00740
								VIT_05s0029g01080	VIT_15s0046g00280					VIT_03s0017g01940
								VIT_14s0171g00220	VIT_07s0151g00800					VIT_09s0002g08420
								VIT_19s0014g02900	VIT_14s0006g01600					VIT_19s0014g01940
								VIT_18s0001g06670	VIT_09s0002g04840					VIT_18s0001g14700
								VIT_18s0001g06790	VIT_18s0001g01410					VIT_16s0050g01990
								VIT_19s0014g00790	VIT_09s0002g03350					VIT_02s0025g01510
								VIT_10s0003g01920	VIT_18s0072g00270					VIT_11s0016g00820
								VIT_10s0003g01890	VIT_18s0001g08750					VIT_18s0001g13300
								VIT_19s0014g00810	VIT_09s0002g06300					VIT_02s0236g00100
								VIT_19s0014g00710	VIT_04s0008g00710					VIT_14s0066g02610
								VIT_10s0003g01960	VIT_13s0019g00090					VIT_18s0001g08420
								VIT_19s0014g00470	VIT_15s0048g02910					VIT_01s0010g03880
								VIT_10s0003g01940	VIT_02s0154g00620					VIT_14s0068g01000
								VIT_19s0014g00520	VIT_11s0118g00580					VIT_08s0007g04840
[truncated: 751 more rows]

## Sheet: B
(B) Enriched functional categories (FCTs) among up-regulated genes in response to N. parvum infection
0 hpi				3 hpi				24 hpi				2 wpi				6 wpi				8 wpi				12 wpi
Stem		Leaf		Stem		Leaf		Stem		Leaf		Stem		Leaf		Stem		Leaf		Stem		Leaf		Stem		Leaf
FCTs	P value	FCTs	P value	FCTs	P value	FCTs	P value	FCTs	P value	FCTs	P value	FCTs	P value	FCTs	P value	FCTs	P value	FCTs	P value	FCTs	P value	FCTs	P value	FCTs	P value	FCTs	P value
Metabolism.Cellular metabolism.Nitrogen and sulfur metabolism.Nitrogen metabolism.Nitrogen assimilation	0.000128898	Metabolism.Primary metabolism.Carbohydrate metabolism.Polysaccharide metabolism.Beta-1,3 glucan metabolism.Beta-1,3 glucan catabolism	5.17e-05	Cellular process.Cellular component organization and biogenesis.Ribosome organization and biogenesis	0.00672952	Cellular process.Cellular component organization and biogenesis.Cell wall organization and biogenesis.Cell wall metabolism.Cell wall modification.Xyloglucan modification	0.000729464	Cellular process.Cell growth and death.Cell death	0.00293486	Cellular process.Cellular component organization and biogenesis.Cell wall organization and biogenesis.Cell wall metabolism.Cell wall biosynthesis.Cell wall glycan monomers generation	0.00895213	Cellular process.Cellular component organization and biogenesis.Cell wall organization and biogenesis.Cell wall metabolism.Cell wall biosynthesis.Cellulose biosynthesis	1.37e-05	Cellular process.Cell growth and death.Cell death	0.000217946	Cellular process.Cellular component organization and biogenesis.Cell wall organization and biogenesis.Cell wall metabolism.Cell wall modification.Xyloglucan modification	1.51e-10	Cellular process.Cellular component organization and biogenesis.Cell wall organization and biogenesis.Cell wall metabolism.Cell wall biosynthesis.Cell wall glycan monomers generation	4.28e-07	Cellular process.Cell growth and death	0.000602492	Cellular process.Cellular component organization and biogenesis.Cell wall organization and biogenesis.Cell wall metabolism.Cell wall modification.Xyloglucan modification	1.29e-06	Cellular process.Cellular component organization and biogenesis.Cell wall organization and biogenesis.Cell wall metabolism.Cell wall biosynthesis.Cellulose biosynthesis	0.000950559	Metabolism.Primary metabolism.Amino acid metabolism.Amino acid catabolism	0.00661505
Metabolism.Cellular metabolism.Nitrogen and sulfur metabolism.Sulfur metabolism.Sulfate assimilation	0.00100166	Metabolism.Primary metabolism.Carbohydrate metabolism.Polysaccharide metabolism.Starch and sucrose metabolism	0.00246097	Metabolism.Primary metabolism.Carbohydrate metabolism.Oligosaccharide metabolism.Trehalose metabolism	0.000612968	Cellular process.Cellular component organization and biogenesis.Cell wall organization and biogenesis.Cell wall structural protein	6.28e-05	Cellular process.Cellular component organization and biogenesis.Ribosome organization and biogenesis	1.95e-06	Cellular process.Cellular component organization and biogenesis.Cell wall organization and biogenesis.Cell wall metabolism.Cell wall modification.Xyloglucan modification	2.18e-06	Cellular process.Cellular component organization and biogenesis.Cell wall organization and biogenesis.Cell wall metabolism.Cell wall modification.Xyloglucan modification	1.19e-13	Cellular process.Cellular component organization and biogenesis.Cell wall organization and biogenesis.Cell wall metabolism.Cell wall biosynthesis.Cell wall glycan monomers generation	0.00179699	Cellular process.Cellular component organization and biogenesis.Cell wall organization and biogenesis.Cell wall structural protein	0.0024682	Cellular process.Cellular component organization and biogenesis.Cell wall organization and biogenesis.Cell wall metabolism.Cell wall catabolism.Xylan catabolism	0.000226067	Cellular process.Cellular component organization and biogenesis.Cell wall organization and biogenesis.Cell wall metabolism.Cell wall biosynthesis.Cellulose biosynthesis	5.06e-09	Metabolism.Cellular metabolism.Oxidation reduction.Alcohol dehydrogenase superfamily	0.00875776	Cellular process.Cellular component organization and biogenesis.Cell wall organization and biogenesis.Cell wall metabolism.Cell wall catabolism.Pectin catabolism	0.00935657	Metabolism.Primary metabolism.Amino acid metabolism.Arginine and proline metabolism	0.00130942
Metabolism.Cellular metabolism.Oxidation reduction.Cytochrome P450 oxidoreductase	8.91e-05	Regulation overview.Regulation of gene expression.Regulation of transcription.Transcription factor.bZIP family transcription factor	0.00554182	Metabolism.Primary metabolism.Protein metabolism and modification.Protein folding.Chaperone-mediated protein folding.Chaperonin	0.00065952	Metabolism.Cellular metabolism.Oxidation reduction.Copper oxidase family	9.1e-05	Diverse functions.Gene family with diverse functions.Pentatricopeptide domain family	5.38e-16	Cellular process.Cellular component organization and biogenesis.Cell wall organization and biogenesis.Cell wall structural protein	0.00129589	Cellular process.Cellular component organization and biogenesis.Organelle organization and biogenesis.Peroxisome organization and biogenesis	0.000100545	Cellular process.Cellular component organization and biogenesis.Cell wall organization and biogenesis.Cell wall metabolism.Cell wall modification.Xyloglucan modification	7.27e-08	Cellular process.Cellular homeostasis.Heavy metal ion homeostasis	0.00171725	Cellular process.Cellular component organization and biogenesis.Cell wall organization and biogenesis.Cell wall metabolism.Cell wall modification.Xyloglucan modification	6.86e-11	Cellular process.Cellular component organization and biogenesis.Cell wall organization and biogenesis.Cell wall metabolism.Cell wall modification.Xyloglucan modification	3.14e-08	Metabolism.Primary metabolism.Amino acid metabolism.Amino acid catabolism	0.000360824	Cellular process.Cellular homeostasis.Heavy metal ion homeostasis	0.00157076	Metabolism.Primary metabolism.Amino acid metabolism.Aromatic amino acid metabolism.Tyrosine metabolism	0.00420411
Metabolism.Primary metabolism.Carbohydrate metabolism.Polysaccharide metabolism.Starch and sucrose metabolism.Starch biosynthesis catabolism.Starch catabolism	0.00196388	Signaling.Hormone Signaling.Ethylene Signaling.Ethylene-mediated Signaling pathway	0.00877069	Metabolism.Primary metabolism.Protein metabolism and modification.Protein synthesis.Translation.Translational initiation	0.00307394	Metabolism.Primary metabolism.Amino acid metabolism.Aromatic amino acid metabolism.Tyrosine metabolism.Tyrosine catabolism	0.00265163	Metabolism.Cellular metabolism.Nitrogen and sulfur metabolism.Nitrogen metabolism	1.86e-05	Diverse functions.Gene family with diverse functions.GASA family	0.00608966	Metabolism.Cellular metabolism.Methane metabolism	0.000708254	Cellular process.Cellular homeostasis.Cell redox homeostasis	0.000277358	Metabolism.Cellular metabolism.Amino acid derivative metabolism.Cyanoamino acid metabolism	0.00731785	Cellular process.Cellular component organization and biogenesis.Cell wall organization and biogenesis.Cell wall structural protein	5.33e-05	Cellular process.Cellular component organization and biogenesis.Cell wall organization and biogenesis.Cell wall structural protein	0.00154662	Metabolism.Primary metabolism.Amino acid metabolism.Aromatic amino acid metabolism.Tyrosine metabolism.Tyrosine catabolism	8.18e-07	Metabolism.Cellular metabolism.Esterase activity	0.00121954	Metabolism.Primary metabolism.Amino acid metabolism.Aromatic amino acid metabolism.Tyrosine metabolism.Tyrosine catabolism	7.94e-05
Metabolism.Primary metabolism.Carbohydrate metabolism.Polysaccharide metabolism.Starch and sucrose metabolism.Starch biosynthesis catabolism.Starch catabolism inhibitor	0.00232531	Signaling.Signaling pathway.Circadian clock Signaling	0.000342554	Regulation overview.Regulation of gene expression.Regulation of transcription.Transcription factor.Other zinc finger family transcription factor	7.78e-05	Metabolism.Primary metabolism.Carbohydrate metabolism.Polysaccharide metabolism.Beta-1,3 glucan metabolism.Beta-1,3 glucan catabolism	0.000373383	Metabolism.Cellular metabolism.Nitrogen and sulfur metabolism.Nitrogen metabolism.Nitrogen assimilation	0.00757051	Metabolism.Cellular metabolism.Oxidation reduction.Copper oxidase family	3.79e-05	Metabolism.Cellular metabolism.Nitrogen and sulfur metabolism.Nitrogen metabolism	0.000227268	Cellular process.Cellular homeostasis.Heavy metal ion homeostasis	0.00812537	Metabolism.Cellular metabolism.Cellular catabolism.Autophagy	0.00359904	Cellular process.Cellular homeostasis.Heavy metal ion homeostasis	0.000642241	Cellular process.Cellular component organization and biogenesis.Cytoskeleton organization and biogenesis.Microtubule organization and biogenesis.Microtubule-driven movement	5.04e-06	Metabolism.Primary metabolism.Carbohydrate metabolism.Oligosaccharide metabolism.Trehalose metabolism	0.000178905	Metabolism.Cellular metabolism.Methane metabolism	0.00107763	Metabolism.Primary metabolism.Carbohydrate metabolism.Glycolysis Gluconeogenesis	0.0072721
Metabolism.Secondary metabolism.Primary amino acids derivated metabolism.Alkaloid metabolism.Alkaloid biosynthesis.Monoterpenoid indole alkaloid metabolism.Monoterpenoid indole alkaloid biosynthesis	0.00988811	Signaling.Signaling pathway.Protein kinase	0.000352037	Signaling.Signaling pathway.Calcium sensors and Signaling	0.000882825	Metabolism.Primary metabolism.Carbohydrate metabolism.Polysaccharide metabolism.Starch and sucrose metabolism	0.00304587	Metabolism.Cellular metabolism.Phytoalexin metabolism.Phytoalexin biosynthesis	7.88e-21	Metabolism.Primary metabolism.Carbohydrate metabolism.Glycolysis Gluconeogenesis	0.00982663	Metabolism.Cellular metabolism.Nitrogen and sulfur metabolism.Nitrogen metabolism.Nitrogen assimilation	0.00771783	Metabolism.Primary metabolism.Amino acid metabolism.Glutamate metabolism	0.00863151	Metabolism.Cellular metabolism.Nitrogen and sulfur metabolism.Nitrogen metabolism	0.00115926	Metabolism.Primary metabolism.Carbohydrate metabolism.Monosaccharide metabolism.Nucleotide sugar metabolism	1.49e-08	Metabolism.Cellular metabolism.Amino acid derivative metabolism.Cyanoamino acid metabolism	0.00769504	Metabolism.Primary metabolism.Lipid metabolism.Glycerolipid metabolism.Glycerophospholipid metabolism	0.000577313	Metabolism.Primary metabolism.Carbohydrate metabolism.Glycolysis Gluconeogenesis.Gluconeogenesis	0.00958687	Metabolism.Primary metabolism.Carbohydrate metabolism.Oligosaccharide metabolism.Trehalose metabolism	0.00692169
Regulation overview.Regulation of gene expression.Regulation of transcription.Transcription factor.AP2 family transcription factor.ERF subfamily transcription factor	0.000717113			Transport overview.Ion transport.Cation transport	0.00878385	Metabolism.Primary metabolism.Lipid metabolism.Fatty acid metabolism.Alpha-linolenic acid metabolism	0.00069184	Metabolism.Cellular metabolism.Shikimate metabolism	2.57e-06	Metabolism.Primary metabolism.Carbohydrate metabolism.Monosaccharide metabolism.Amino sugar metabolism	0.0016487	Metabolism.Cellular metabolism.Oxidation reduction.Cytochrome P450 oxidoreductase	5.38e-05	Metabolism.Primary metabolism.Carbohydrate metabolism.Glycosyl transference	0.00175799	Metabolism.Primary metabolism.Carbohydrate metabolism.Polysaccharide metabolism.Starch and sucrose metabolism.Starch biosynthesis catabolism.Starch catabolism inhibitor	0.00738175	Metabolism.Primary metabolism.Carbohydrate metabolism.Monosaccharide metabolism.Pentose glucuronate interconversion	0.000324731	Metabolism.Cellular metabolism.Nitrogen and sulfur metabolism.Nitrogen metabolism	3.3e-08	Metabolism.Secondary metabolism.Aromatic compound metabolism.Rosmarinic acid biosynthesis	3.57e-06	Metabolism.Primary metabolism.Coenzyme and prosthetic group metabolism.Peptide derived compounds biosynthesis.Glutathione metabolism	0.00130686	Metabolism.Primary metabolism.Carbohydrate metabolism.Polysaccharide metabolism.Starch and sucrose metabolism	0.000250529
Regulation overview.Regulation of gene expression.Regulation of transcription.Transcription factor.WRKY family transcription factor	0.00013492			Transport overview.Macromolecule transport.RNA transport	1.98e-05	Metabolism.Primary metabolism.Lipid metabolism.Fatty acid metabolism.Oxylipin biosynthesis	4.81e-06	Metabolism.Primary metabolism.Amino acid metabolism.Alanine and aspartate metabolism	5.34e-05	Metabolism.Primary metabolism.Carbohydrate metabolism.Polysaccharide metabolism.Starch and sucrose metabolism	0.00888483	Metabolism.Cellular metabolism.Phytoalexin metabolism.Phytoalexin biosynthesis	1.47e-15	Metabolism.Primary metabolism.Carbohydrate metabolism.Monosaccharide metabolism.Galactose metabolism	0.00786837	Metabolism.Primary metabolism.Lipid metabolism.Glycerolipid metabolism.Glycerolipid catabolism	0.00359904	Metabolism.Primary metabolism.Carbohydrate metabolism.Polysaccharide metabolism.Starch and sucrose metabolism	0.00249374	Metabolism.Cellular metabolism.Phytoalexin metabolism.Phytoalexin biosynthesis	4.15e-05	Metabolism.Secondary metabolism.Phenylpropanoid metabolism.Flavonoid metabolism.Flavonoid biosynthesis.Anthocyanin biosynthesis	0.00984883	Metabolism.Primary metabolism.Lipid metabolism.Fatty acid metabolism	0.00108477	Metabolism.Primary metabolism.Lipid metabolism.Glycerolipid metabolism.Glycerophospholipid metabolism	7.38e-05
Response to stimulus.Stress response.Abiotic stress response.wounding	2.43e-11			Transport overview.Primary Active Transporters.P-P-bond hydrolysis-driven transporters.P-type ATPase (P-ATPase).Ca2+ATPase (efflux)	2.63e-06	Metabolism.Primary metabolism.Protein metabolism and modification.Proteolysis.Peptidase-mediated proteolysis	0.000495422	Metabolism.Primary metabolism.Amino acid metabolism.Amino acid biosynthesis	9.21e-09	Regulation overview.Regulation of gene expression.Regulation of transcription.Transcription factor.bHLH family transcription factor	5.09e-08	Metabolism.Cellular metabolism.Shikimate metabolism	0.00777925	Metabolism.Primary metabolism.Carbohydrate metabolism.Monosaccharide metabolism.Nucleotide sugar metabolism	0.00262627	Metabolism.Primary metabolism.Protein metabolism and modification.Proteolysis.Protease inhibition	7.22e-05	Metabolism.Primary metabolism.Carbohydrate metabolism.Polysaccharide metabolism.Starch and sucrose metabolism.Starch biosynthesis catabolism	1.84e-05	Metabolism.Primary metabolism.Amino acid metabolism.Arginine and proline metabolism	0.00468532	Metabolism.Secondary metabolism.Terpenoid metabolism.Terpenoid biosynthesis	0.00837799	Metabolism.Primary metabolism.Lipid metabolism.Fatty acid metabolism.Fatty acid biosynthesis	0.00019324	Metabolism.Secondary metabolism.Aromatic compound metabolism.Rosmarinic acid biosynthesis	0.000230223
Signaling.Hormone Signaling.Ethylene Signaling.Ethylene-mediated Signaling pathway	8.61e-05					Metabolism.Secondary metabolism.Aromatic compound metabolism.Rosmarinic acid biosynthesis	0.00723823	Metabolism.Primary metabolism.Amino acid metabolism.Amino acid catabolism	0.000431981	Regulation overview.Regulation of gene expression.Regulation of transcription.Transcription factor.GIF family transcription factor	0.00440767	Metabolism.Primary metabolism.Amino acid metabolism.Amino acid catabolism	0.000603404	Metabolism.Primary metabolism.Carbohydrate metabolism.Monosaccharide metabolism.Pentose glucuronate interconversion	0.000403437	Metabolism.Secondary metabolism.Phenylpropanoid metabolism.Lignan metabolism.Lignan biosynthesis	0.00200777	Metabolism.Primary metabolism.Lipid metabolism.Fatty acid metabolism.Fatty acid biosynthesis	0.00641548	Metabolism.Primary metabolism.Amino acid metabolism.Aromatic amino acid metabolism.Tyrosine metabolism	0.0031523	Regulation overview.Regulation of gene expression.Regulation of transcription.Transcription factor.JAZ family transcription factor	0.000679148	Metabolism.Primary metabolism.Lipid metabolism.Glycerolipid metabolism.Glycerophospholipid metabolism.Glycerophospholipid biosynthesis	0.00243509	Signaling.Hormone Signaling.ABA Signaling.ABA-mediated Signaling pathway	0.00710784
Transport overview.Accessory factors involved in transport.Auxiliary transport proteins.Phosphotransferase System Enzyme I	0.000945922					Metabolism.Secondary metabolism.Terpenoid metabolism.Terpenoid biosynthesis.Mevalonate biosynthesis	0.00400092	Metabolism.Primary metabolism.Amino acid metabolism.Arginine and proline metabolism	1.73e-05	Regulation overview.Regulation of gene expression.Regulation of transcription.Transcription factor.GRF family transcription factor	1.07e-05	Metabolism.Primary metabolism.Amino acid metabolism.Aromatic amino acid metabolism.Phenylalanine metabolism.Phenylalanine biosynthesis	4.91e-06	Metabolism.Primary metabolism.Carbohydrate metabolism.Oligosaccharide metabolism.Trehalose metabolism	7.44e-05	Metabolism.Secondary metabolism.Phenylpropanoid metabolism.Lignin metabolism	3.57e-10	Metabolism.Primary metabolism.Organic acid metabolism.Ascorbate and aldarate metabolism	0.000718976	Metabolism.Primary metabolism.Carbohydrate metabolism.Monosaccharide metabolism	0.00658753	Regulation overview.Regulation of gene expression.Regulation of transcription.Transcription factor.WRKY family transcription factor	0.0026125	Metabolism.Secondary metabolism.Phenylpropanoid metabolism.Lignin metabolism	7.04e-05
Transport overview.Electrochemical Potential-driven Transporters.Porters.Amino Acid/Auxin Permease	0.00434582					Regulation overview.Regulation of gene expression.Regulation of transcription.Transcription factor.AP2 family transcription factor	0.0078024	Metabolism.Primary metabolism.Amino acid metabolism.Aromatic amino acid metabolism.Aromatic amino acid biosynthesis	1.93e-08	Regulation overview.Regulation of gene expression.Regulation of transcription.Transcription factor.SBP family transcription factor	0.000174522	Metabolism.Primary metabolism.Amino acid metabolism.Aromatic amino acid metabolism.Tyrosine metabolism	8.25e-05	Metabolism.Primary metabolism.Carbohydrate metabolism.Polysaccharide metabolism.Starch and sucrose metabolism	0.00100025	Metabolism.Secondary metabolism.Phenylpropanoid metabolism.Phenylpropanoid biosynthesis	0.000705287	Metabolism.Primary metabolism.Protein metabolism and modification.Protein modification.Protein glycosylation	0.00256105	Metabolism.Primary metabolism.Carbohydrate metabolism.Monosaccharide metabolism.Amino sugar metabolism	0.0026911	Regulation overview.Regulation of gene expression.Regulation of transcription.Transcription factor.ZIM family transcription factor	0.00145459	Metabolism.Secondary metabolism.Phenylpropanoid metabolism.Phenylpropanoid biosynthesis	0.00052121
Transport overview.Electrochemical Potential-driven Transporters.Porters.Chloride Carrier/Channel	0.00972922					Regulation overview.Regulation of gene expression.Regulation of transcription.Transcription factor.bHLH family transcription factor	0.00433128	Metabolism.Primary metabolism.Amino acid metabolism.Aromatic amino acid metabolism.Phenylalanine metabolism.Phenylalanine biosynthesis	4.12e-08	Response to stimulus.Stress response.Biotic stress response.Plant-pathogen interaction	0.000233146	Metabolism.Primary metabolism.Amino acid metabolism.Aromatic amino acid metabolism.Tyrosine metabolism.Tyrosine catabolism	0.000740309	Metabolism.Primary metabolism.Carbohydrate metabolism.Polysaccharide metabolism.Starch and sucrose metabolism.Starch biosynthesis catabolism.Starch biosynthesis	5.84e-06	Metabolism.Secondary metabolism.Phenylpropanoid metabolism.Stilbenoid metabolism.Stilbenoid biosynthesis	0.00355111	Regulation overview.Regulation of gene expression.Regulation of transcription.Transcription factor.JAZ family transcription factor	8.2e-06	Metabolism.Primary metabolism.Carbohydrate metabolism.Polysaccharide metabolism.Beta-1,3 glucan metabolism.Beta-1,3 glucan catabolism	3.95e-05	Response to stimulus.Stress response.Abiotic stress response.Hypoxia stress response	0.000398467	Metabolism.Secondary metabolism.Phenylpropanoid metabolism.Stilbenoid metabolism.Stilbenoid biosynthesis	0.00310995
Transport overview.Electrochemical Potential-driven Transporters.Porters.Oligopeptide Transporter	0.000354398					Regulation overview.Regulation of gene expression.Regulation of transcription.Transcription factor.CO-like / B-box family transcriprion factor	0.000912876	Metabolism.Primary metabolism.Amino acid metabolism.Aromatic amino acid metabolism.Tyrosine metabolism	2.48e-10	Signaling.Hormone Signaling.ABA Signaling.ABA-mediated Signaling pathway	0.00325518	Metabolism.Primary metabolism.Amino acid metabolism.Beta-Alanine metabolism	0.00494465	Metabolism.Primary metabolism.Carbohydrate metabolism.Polysaccharide metabolism.Starch and sucrose metabolism.Starch biosynthesis catabolism.Starch branching	0.000292933	Metabolism.single reactions	1.9e-06	Regulation overview.Regulation of gene expression.Regulation of transcription.Transcription factor.TCP family transcription factor	0.00342377	Metabolism.Primary metabolism.Carbohydrate metabolism.Polysaccharide metabolism.Starch and sucrose metabolism.Starch biosynthesis catabolism.Starch catabolism inhibitor	2.59e-05	Response to stimulus.Stress response.Abiotic stress response.wounding	0.00281239	Regulation overview.Regulation of gene expression.Regulation of transcription.Transcription factor.AP2 family transcription factor.ERF subfamily transcription factor	0.00797147
Transport overview.Ion transport.Anion transport.Chloride transport	0.00100166					Regulation overview.Regulation of gene expression.Regulation of transcription.Transcription factor.JAZ family transcription factor	0.00928815	Metabolism.Primary metabolism.Amino acid metabolism.Asparagine, aspartate metabolism.Aspartate metabolism.Aspartate catabolism	0.00839791	Signaling.Hormone Signaling.Ethylene Signaling.Ethylene-mediated Signaling pathway	6.28e-06	Metabolism.Primary metabolism.Carbohydrate metabolism.Glycolysis Gluconeogenesis.Gluconeogenesis	0.000131187	Metabolism.Primary metabolism.Carbohydrate metabolism.Polysaccharide metabolism.Starch and sucrose metabolism.Starch biosynthesis catabolism.Starch catabolism	7.89e-05	Regulation overview.Regulation of gene expression.Regulation of transcription.Transcription factor.Orphans Response reg family transcription factor	0.00359935	Regulation overview.Regulation of gene expression.Regulation of transcription.Transcription factor.WRKY family transcription factor	0.00338552	Metabolism.Primary metabolism.Coenzyme and prosthetic group metabolism.Peptide derived compounds biosynthesis.Glutathione metabolism	7.24e-05	Signaling.Hormone Signaling.Jasmonate salicylate signaling.Jasmonate Signaling.Jasmonate-mediated Signaling pathway	0.00055233	Regulation overview.Regulation of gene expression.Regulation of transcription.Transcription factor.MYB family transcription factor	6.03e-06
Transport overview.Macromolecule transport.Amino acid transport	0.0072893					Regulation overview.Regulation of gene expression.Regulation of transcription.Transcription factor.SBP family transcription factor	0.00030219	Metabolism.Primary metabolism.Amino acid metabolism.Cysteine and methionine metabolism	0.00364283	Signaling.Hormone Signaling.Gibberellic acid Signaling.Gibberellic acid-mediated Signaling pathway	0.00294671	Metabolism.Primary metabolism.Carbohydrate metabolism.Monosaccharide metabolism.Galactose metabolism	0.00881285	Metabolism.Primary metabolism.Carbohydrate metabolism.Polysaccharide metabolism.Starch and sucrose metabolism.Sucrose biosynthesis	0.00551212	Regulation overview.Regulation of gene expression.Regulation of transcription.Transcription factor.WRKY family transcription factor	0.000527015	Regulation overview.Regulation of gene expression.Regulation of transcription.Transcription factor.ZIM family transcription factor	4.42e-05	Metabolism.Primary metabolism.Lipid metabolism.Fatty acid metabolism.Oxylipin biosynthesis	0.00367724	Signaling.Signaling pathway.Calcium sensors and Signaling	0.00582967	Regulation overview.Regulation of gene expression.Regulation of transcription.Transcription factor.WRKY family transcription factor	0.00250096
Transport overview.Macromolecule transport.Oligopeptide transport	6.6e-05					Signaling.Signaling pathway.Protein kinase	2.95e-05	Metabolism.Primary metabolism.Amino acid metabolism.Cysteine metabolism	0.000258362	Signaling.Hormone Signaling.Jasmonate salicylate signaling.Jasmonate Signaling.Jasmonate-mediated Signaling pathway	0.00918188	Metabolism.Primary metabolism.Carbohydrate metabolism.Monosaccharide metabolism.Pyruvate metabolism	1.27e-05	Metabolism.Primary metabolism.Coenzyme and prosthetic group metabolism.Nicotinate and nicotinamide metabolism	0.00593657	Response to stimulus.Stress response	0.00405303	Response to stimulus.Stress response.Abiotic stress response	0.00267261	Metabolism.Primary metabolism.Protein metabolism and modification.Proteolysis.Protease inhibition	0.00553331	Transport overview.Electrochemical Potential-driven Transporters.Porters.Amino Acid-Polyamine-Organocation.Cationic Amino Acid Transporter	0.00103161	Response to stimulus.Stress response.Abiotic stress response.Oxidative stress response	5.01e-08
						Signaling.Signaling pathway.Signaling receptor	0.000912876	Metabolism.Primary metabolism.Amino acid metabolism.Glycine, serine, and threonine metabolism	0.00105959	Signaling.Hormone Signaling.Jasmonate salicylate signaling.Salicylic acid Signaling.Salicylic acid-mediated Signaling pathway	3.19e-07	Metabolism.Primary metabolism.Carbohydrate metabolism.Oligosaccharide metabolism.Trehalose metabolism	8.99e-05	Metabolism.Primary metabolism.Generation of metabolite precursors and energy.Glyoxylate and dicarboxylate metabolism	0.000244679	Response to stimulus.Stress response.Abiotic stress response.Hypoxia stress response	9.01e-06	Response to stimulus.Stress response.Abiotic stress response.Hypoxia stress response	0.00526308	Metabolism.Secondary metabolism.Phenylpropanoid metabolism.Flavonoid metabolism.Flavonoid biosynthesis.Anthocyanin biosynthesis.Anthocyanin-glycoside biosynthesis	9.57e-05	Transport overview.Incompletely characterized transport systems.Recognized transporters of unknown biochemical mechanism.Iron/Lead Transporter.Oxidase-dep Fe2+ Transporter	0.000263419	Signaling.Hormone Signaling.Jasmonate salicylate signaling.Jasmonate Signaling.Jasmonate-mediated Signaling pathway	0.00284093
						Transport overview.Electrochemical Potential-driven Transporters.Porters.Proton-dependent Oligopeptide Transporter	0.000965211	Metabolism.Primary metabolism.Amino acid metabolism.Histidine metabolism	7.1e-05	Signaling.Signaling pathway.Calcium sensors and Signaling	0.000256866	Metabolism.Primary metabolism.Carbohydrate metabolism.Polysaccharide metabolism.Starch and sucrose metabolism.Sucrose catabolism	0.00939992	Metabolism.Primary metabolism.Generation of metabolite precursors and energy.Photosynthesis.Photosystem II	0.0076862	Response to stimulus.Stress response.Abiotic stress response.Oxidative stress response	1.02e-05	Response to stimulus.Stress response.Biotic stress response.Plant-pathogen interaction	7.63e-05	Metabolism.Secondary metabolism.Phenylpropanoid metabolism.Lignan metabolism.Lignan biosynthesis	0.000187466	Transport overview.Ion transport.Anion transport.Nitrate transport	0.00419755	Signaling.Hormone Signaling.Jasmonate salicylate signaling.Salicylic acid Signaling.Salicylic acid-mediated Signaling pathway	0.00958687
						Transport overview.Electrochemical Potential-driven Transporters.Porters.Resistance-Nodulation-Cell Division.Eukaryotic (Putative) Sterol Transporter	0.0026971	Metabolism.Primary metabolism.Amino acid metabolism.Lysine metabolism.Lysine biosynthesis	0.00883815	Signaling.Signaling pathway.Protein kinase	2.68e-13	Metabolism.Primary metabolism.Carbon fixation	0.00182336	Metabolism.Primary metabolism.Lipid metabolism.Glycerolipid metabolism	0.00299287	Response to stimulus.Stress response.Biotic stress response	0.00347764	Signaling.Hormone Signaling.Ethylene Signaling.Ethylene-mediated Signaling pathway	0.00782337	Metabolism.Secondary metabolism.Phenylpropanoid metabolism.Lignin metabolism	3.52e-05	Transport overview.Macromolecule transport.Amino acid transport	0.0086071	Transport overview.Electrochemical Potential-driven Transporters.Porters.Phosphate Permease (Pho1)	0.00586295
						Transport overview.Incompletely characterized transport systems.Recognized transporters of unknown biochemical mechanism.Iron/Lead Transporter.Oxidase-dep Fe2+ Transporter	0.00143412	Metabolism.Primary metabolism.Amino acid metabolism.Lysine metabolism.Lysine catabolism	0.00839791	Signaling.Signaling pathway.Protein kinase.MAPK cascade	0.000270277	Metabolism.Primary metabolism.Coenzyme and prosthetic group metabolism.Pantothenate and CoA metabolism.Pantothenate and CoA biosynthesis	0.00390697	Metabolism.Primary metabolism.Lipid metabolism.Glycerolipid metabolism.Glycerolipid catabolism	0.00109965	Response to stimulus.Stress response.Biotic stress response.Virus stress response	0.00880192	Signaling.Hormone Signaling.Gibberellic acid Signaling.Gibberellic acid-mediated Signaling pathway	0.00270725	Metabolism.Secondary metabolism.Phenylpropanoid metabolism.Phenylpropanoid biosynthesis	1.12e-09			Transport overview.Electrochemical Potential-driven Transporters.Porters.Proton-dependent Oligopeptide Transporter	0.00398357
						Transport overview.Macromolecule transport.Carbohydrate transport.Sugar transport	0.00641741	Metabolism.Primary metabolism.Carbohydrate metabolism.Glycolysis Gluconeogenesis.Pyruvate decarboxylation	0.00028474	Transport overview.Ion transport.Cation transport	0.00779982	Metabolism.Primary metabolism.Coenzyme and prosthetic group metabolism.Peptide derived compounds biosynthesis.Glutathione metabolism	1.15e-16	Metabolism.Primary metabolism.Organic acid metabolism.Ascorbate and aldarate metabolism	0.00509434	Signaling.Hormone Signaling.Jasmonate salicylate signaling.Salicylic acid Signaling.Salicylic acid-mediated Signaling pathway	0.000390103	Signaling.Signaling pathway.Calcium sensors and Signaling	3.86e-05	Metabolism.Secondary metabolism.Phenylpropanoid metabolism.Stilbenoid metabolism.Stilbenoid biosynthesis	4.35e-06			Transport overview.Electrochemical Potential-driven Transporters.Porters.Sulfate Permease	0.00975426
						Transport overview.Macromolecule transport.Oligopeptide transport	0.000359222	Metabolism.Primary metabolism.Carbohydrate metabolism.Monosaccharide metabolism.Pyruvate metabolism	0.00038081	Transport overview.Macromolecule transport.Nucleotide transport	0.0033687	Metabolism.Primary metabolism.Generation of metabolite precursors and energy.Citric acid cycle	0.000930393	Metabolism.Primary metabolism.Protein metabolism and modification.Proteolysis.Peptidase-mediated proteolysis	0.000442636	Transport overview.Channels and pores.a-Type channels.Neurotransmitter Receptor, Cys loop, Ligand-gated Ion Channel	3.93e-06	Transport overview.Ion transport.Cation transport	0.00362909	Metabolism.single reactions	0.00404674			Transport overview.Group translocators.Acyl CoA ligase-coupled transporters.Proposed Fatty Acid Transporter	0.0012831
						Transport overview.Water transport.Aquaporins.TIP	0.000244257	Metabolism.Primary metabolism.Carbohydrate metabolism.Polysaccharide metabolism.Starch and sucrose metabolism.Sucrose catabolism	1.77e-05	Transport overview.Macromolecule transport.Oligopeptide transport	0.0062082	Metabolism.Primary metabolism.Generation of metabolite precursors and energy.Reductive carboxylate cycle	0.00385326	Metabolism.Secondary metabolism.Terpenoid metabolism.Tetraterpenoid metabolism.Tetraterpenoid biosynthesis.Carotenoid biosynthesis	0.00189057	Transport overview.Incompletely characterized transport systems.Recognized transporters of unknown biochemical mechanism.Iron/Lead Transporter.Oxidase-dep Fe2+ Transporter	6.2e-09			Regulation overview.Regulation of cell cycle	9.19e-05			Transport overview.Incompletely characterized transport systems.Recognized transporters of unknown biochemical mechanism.Iron/Lead Transporter.Oxidase-dep Fe2+ Transporter	2.94e-05
								Metabolism.Primary metabolism.Carbon fixation	0.00134182			Metabolism.Primary metabolism.Lipid metabolism.Fatty acid metabolism.Alpha-linolenic acid metabolism	3.97e-05	Regulation overview.Regulation of gene expression.Regulation of transcription.Transcription factor.AP2 family transcription factor.ERF subfamily transcription factor	8.37e-07	Transport overview.Ion transport.Cation transport.Heavy metal ion transport	0.00588176			Regulation overview.Regulation of gene expression.Regulation of transcription.Transcription factor.WRKY family transcription factor	4.35e-08			Transport overview.Macromolecule transport	0.00405438
								Metabolism.Primary metabolism.Coenzyme and prosthetic group metabolism.Nicotinate and nicotinamide metabolism.NAD biosynthesis	0.00667424			Metabolism.Primary metabolism.Lipid metabolism.Fatty acid metabolism.Oxylipin biosynthesis	7.34e-05	Regulation overview.Regulation of gene expression.Regulation of transcription.Transcription factor.JAZ family transcription factor	0.00352636					Response to stimulus.Stress response	0.000228009			Transport overview.Macromolecule transport.Lipid transport	2.38e-09
								Metabolism.Primary metabolism.Coenzyme and prosthetic group metabolism.Pantothenate and CoA metabolism.Pantothenate and CoA biosynthesis	0.00460333			Metabolism.Primary metabolism.Lipid metabolism.Glycerolipid metabolism	0.00181537	Regulation overview.Regulation of gene expression.Regulation of transcription.Transcription factor.NAC family transcription factor	0.00553902					Response to stimulus.Stress response.Abiotic stress response.Oxidative stress response	2.63e-09			Transport overview.Macromolecule transport.Lipid transport.Phosphatidylinositol/Phosphatidyl choline transport	0.00243509
								Metabolism.Primary metabolism.Generation of metabolite precursors and energy.Citric acid cycle	1.78e-06			Metabolism.Primary metabolism.Organic acid metabolism.Propanoate metabolism	0.00281989	Regulation overview.Regulation of gene expression.Regulation of transcription.Transcription factor.Sigma70-like family transcription factor	0.00818214					Response to stimulus.Stress response.Biotic stress response	0.0013537			Transport overview.Macromolecule transport.Nucleobase or ascorbate transport	0.00157076
								Metabolism.Primary metabolism.Generation of metabolite precursors and energy.Reductive carboxylate cycle	0.00284156			Metabolism.Secondary metabolism.Aromatic compound metabolism.Rosmarinic acid biosynthesis	0.00390697	Regulation overview.Regulation of gene expression.Regulation of transcription.Transcription factor.WRKY family transcription factor	4e-06					Signaling.Hormone Signaling.Auxin Signaling.Auxin metabolism	0.00345365			Unclear	0.000811284
								Metabolism.Primary metabolism.Lipid metabolism.Fatty acid metabolism.Oxylipin biosynthesis	0.0032554			Metabolism.Secondary metabolism.Phenylpropanoid metabolism.Flavonoid metabolism.Flavonoid biosynthesis	0.000640856	Response to stimulus.Stress response.Biotic stress response	0.00986082					Signaling.Hormone Signaling.Cytokinin Signaling.Cytokinin metabolism.Cytokinin inactivation by glycosylation	0.00663871
								Metabolism.Primary metabolism.Nucleobase, nucleoside, nucleotide, nucleic acid metabolism.Nucleotide metabolism.Purine metabolism	2.28e-07			Metabolism.Secondary metabolism.Phenylpropanoid metabolism.Flavonoid metabolism.Flavonoid biosynthesis.Anthocyanin biosynthesis.Anthocyanin-glycoside biosynthesis	0.0073445	Response to stimulus.Stress response.Biotic stress response.Plant-pathogen interaction	4.87e-05					Signaling.Hormone Signaling.Ethylene Signaling.Ethylene-mediated Signaling pathway	0.00505109
								Metabolism.Primary metabolism.Protein metabolism and modification.Protein synthesis.Ribosome	8.12e-15			Metabolism.Secondary metabolism.Phenylpropanoid metabolism.Lignin metabolism	6.51e-16	Response to stimulus.Stress response.Biotic stress response.Plant-pathogen interaction.R proteins from Plant-pathogen interaction	3.04e-05					Signaling.Hormone Signaling.Jasmonate salicylate signaling.Salicylic acid Signaling.Salicylic acid-mediated Signaling pathway	0.00156075
								Metabolism.Primary metabolism.Protein metabolism and modification.Protein synthesis.Translation	0.000277464			Metabolism.Secondary metabolism.Phenylpropanoid metabolism.Lignin metabolism.Lignin biosynthesis	0.000387527	Signaling.Hormone Signaling.Ethylene Signaling.Ethylene-mediated Signaling pathway	0.000134907					Signaling.Signaling pathway.Protein kinase	2.99e-14
								Metabolism.Secondary metabolism.Aromatic compound metabolism.Rosmarinic acid biosynthesis	0.000946718			Metabolism.Secondary metabolism.Phenylpropanoid metabolism.Phenylpropanoid biosynthesis	4.82e-27	Signaling.Hormone Signaling.Jasmonate salicylate signaling.Jasmonate Signaling.Jasmonate-mediated Signaling pathway	0.00251759					Transport overview.Channels and pores.Pore-forming toxins.Aerolysin Channel-forming Toxin	0.00774076
								Metabolism.Secondary metabolism.Phenylpropanoid metabolism.Lignin metabolism	2.61e-05			Metabolism.Secondary metabolism.Phenylpropanoid metabolism.Stilbenoid metabolism.Stilbenoid biosynthesis	6.84e-21	Signaling.Hormone Signaling.Jasmonate salicylate signaling.Salicylic acid Signaling.Salicylic acid-mediated Signaling pathway	1.57e-06					Transport overview.Electrochemical Potential-driven Transporters.Porters.Major Facilitator Superfamily.Sugar Porter	0.00528347
								Metabolism.Secondary metabolism.Phenylpropanoid metabolism.Phenylpropanoid biosynthesis	4.4e-22			Metabolism.Secondary metabolism.Primary amino acids derivated metabolism.Alkaloid metabolism.Alkaloid biosynthesis.Monoterpenoid indole alkaloid metabolism.Monoterpenoid indole alkaloid biosynthesis	0.00281989	Signaling.Signaling pathway.Calcium sensors and Signaling	0.000210628					Transport overview.Electrochemical Potential-driven Transporters.Porters.Proton-dependent Oligopeptide Transporter	0.00345365
[truncated: 25 more rows]

## Sheet: C
(C) Enriched functional categories (FCTs) among down-regulated genes in response to N. parvum infection
0 hpi				3 hpi				24 hpi				2 wpi				6 wpi				8 wpi				12 wpi
Stem		Leaf		Stem		Leaf		Stem		Leaf		Stem		Leaf		Stem		Leaf		Stem		Leaf		Stem		Leaf
[truncated: 51 more rows]

## Sheet: D
(D) Transcriptional modulation of the 2,978 genes identified as significantly differentially expressed (adj. P ≤ 0.05) in both tissues in response to N. parvum infection
[truncated: 2,980 more rows]
